# Supplementary material for: Deriving comprehensive literature trends on multi-omics analysis studies in autism spectrum disorder using literature mining pipeline
Source: Front Neurosci. 2024 Nov 12;18:1400412. doi: 10.3389/fnins.2024.1400412 (PMC11590066; doi:10.3389/fnins.2024.1400412)
Supplement: SUPPLEMENTARY TABLE S1 — Results of topic modeling. [file Table_1.XLSX]

## Sheet: topic_info_w_pmids
PMID	Year	Month	Day	Title	Topic	Name	Representation	Representative_Docs	Top_n_words	Probability	Representative_document
15923790	2016	4	23	Health informatics: a roadmap for autism knowledge sharing.	-1	-1_asd_autism_children_disorder	['asd', 'autism', 'children', 'disorder', 'social', 'spectrum', 'study', 'disorders', 'autistic', 'individuals']	["Whether parental psychiatric disorders are associated with autism spectrum disorder (ASD) in offspring has remained inconclusive. We examined the associations of parental psychiatric disorders with ASD in offspring. This population-based case-control study used Taiwan's National Health Insurance Research Database to identify a cohort of children born from 2004 to 2017 and their parents. A total…	asd - autism - children - disorder - social - spectrum - study - disorders - autistic - individuals	0.146682	FALSE
16075402	2023	10	16	[Best practice guidelines for the early detection of Autistic Spectrum Disorders (I)].	0	0_diagnostic_screening_dsm_diagnosis	['diagnostic', 'screening', 'dsm', 'diagnosis', 'autism', 'ados', 'chat', 'months', 'developmental', 'specificity']	["The Modified Checklist for Autism in Toddlers (M-CHAT) could be appropriate for universal screening for autism spectrum disorder (ASD) at 18 months and 24 months. Validation studies, however, reported differences in psychometric properties across sample populations. This meta-analysis summarized its accuracy measures and quantified their change in relation to patient and study characteristics.F…	diagnostic - screening - dsm - diagnosis - autism - ados - chat - months - developmental - specificity	0.177984	FALSE
16138288	2023	10	16	[Best practice guidelines for the diagnosis of autistic spectrum disorders].	-1	-1_asd_autism_children_disorder	['asd', 'autism', 'children', 'disorder', 'social', 'spectrum', 'study', 'disorders', 'autistic', 'individuals']	["Whether parental psychiatric disorders are associated with autism spectrum disorder (ASD) in offspring has remained inconclusive. We examined the associations of parental psychiatric disorders with ASD in offspring. This population-based case-control study used Taiwan's National Health Insurance Research Database to identify a cohort of children born from 2004 to 2017 and their parents. A total…	asd - autism - children - disorder - social - spectrum - study - disorders - autistic - individuals	0.143173	FALSE
16415981	2014	4	28	Principal genetic syndromes and autism: from phenotypes, proteins to genes.	-1	-1_asd_autism_children_disorder	['asd', 'autism', 'children', 'disorder', 'social', 'spectrum', 'study', 'disorders', 'autistic', 'individuals']	["Whether parental psychiatric disorders are associated with autism spectrum disorder (ASD) in offspring has remained inconclusive. We examined the associations of parental psychiatric disorders with ASD in offspring. This population-based case-control study used Taiwan's National Health Insurance Research Database to identify a cohort of children born from 2004 to 2017 and their parents. A total…	asd - autism - children - disorder - social - spectrum - study - disorders - autistic - individuals	0.205852	FALSE
19124699	2013	7	17	Health care use and health and functional impact of developmental disabilities among US children, 1997-2005.	-1	-1_asd_autism_children_disorder	['asd', 'autism', 'children', 'disorder', 'social', 'spectrum', 'study', 'disorders', 'autistic', 'individuals']	["Whether parental psychiatric disorders are associated with autism spectrum disorder (ASD) in offspring has remained inconclusive. We examined the associations of parental psychiatric disorders with ASD in offspring. This population-based case-control study used Taiwan's National Health Insurance Research Database to identify a cohort of children born from 2004 to 2017 and their parents. A total…	asd - autism - children - disorder - social - spectrum - study - disorders - autistic - individuals	0.602332	FALSE
19124707	2013	7	17	Cerebral palsy, autism spectrum disorders, and developmental delay in children born after assisted conception: a systematic review and meta-analysis.	5	5_birth_risk_born_95	['birth', 'risk', 'born', '95', 'ci', 'preterm', 'maternal', 'perinatal', 'age', 'factors']	['We sought to estimate the prevalence of autism spectrum disorder (ASD) in children born extremely preterm relative to the U.S. population risk of 1.5% [CDC, 2014] using the best-available diagnostic procedures and minimizing confounding with other neurodevelopmental impairments. Eight hundred and eighty nine of 966 (92%) 10-year-old children from the Extremely Low Gestational Age Newborn birth …	birth - risk - born - 95 - ci - preterm - maternal - perinatal - age - factors	0.0813632	FALSE
19319661	2013	8	5	Creatine transporter deficiency in two adult patients with static encephalopathy.	-1	-1_asd_autism_children_disorder	['asd', 'autism', 'children', 'disorder', 'social', 'spectrum', 'study', 'disorders', 'autistic', 'individuals']	["Whether parental psychiatric disorders are associated with autism spectrum disorder (ASD) in offspring has remained inconclusive. We examined the associations of parental psychiatric disorders with ASD in offspring. This population-based case-control study used Taiwan's National Health Insurance Research Database to identify a cohort of children born from 2004 to 2017 and their parents. A total…	asd - autism - children - disorder - social - spectrum - study - disorders - autistic - individuals	0.738523	FALSE
19582215	2014	2	20	Association study between BDNF gene polymorphisms and autism by three-dimensional gel-based microarray.	57	57_snps_association_genetic_polymorphisms	['snps', 'association', 'genetic', 'polymorphisms', 'genome', 'allele', 'gene', 'haplotype', 'wide', 'genes']	["Autism spectrum disorder (ASD) is neurodevelopmental disorder characterized by stereotyped behavior and deficits in communication and social interactions. To date, numerous studies have investigated the associations between genetic variants and ASD risk. However, the results of these published studies lack a clear consensus. In the present study, we performed a systematic review on the associat…	snps - association - genetic - polymorphisms - genome - allele - gene - haplotype - wide - genes	1	FALSE
19582563	2013	1	14	Sex differences in autism spectrum disorder: an examination of developmental functioning, autistic symptoms, and coexisting behavior problems in toddlers.	26	26_females_camouflaging_sex_girls	['females', 'camouflaging', 'sex', 'girls', 'males', 'gender', 'differences', 'women', 'female', 'boys']	['There is lack of consensus in the literature regarding sex differences in social outcomes for individuals on the autism spectrum. Furthermore, little research has focused on the social experiences of high school students with autism spectrum disorder (ASD) during the school day. Using a large racially/ethnically diverse sample of high school students with ASD receiving special education service…	females - camouflaging - sex - girls - males - gender - differences - women - female - boys	1	FALSE
19588236	2013	1	14	Fundamental movement skills in children diagnosed with autism spectrum disorders and attention deficit hyperactivity disorder.	32	32_motor_walking_gait_coordination	['motor', 'walking', 'gait', 'coordination', 'dcd', 'gross', 'skills', 'movement', 'toe', 'stereotypies']	['Delays within the motor domain are often overlooked as an early surveillance marker for autism. The present study evaluated motor difficulties and its potential as an early predictive marker for later autism likelihood in a cohort of infants (N\xa0=\xa096) showing early behavioral signs of autism aged 9-14\u2009months. The motor domain was evaluated using the motor subscales of the Mullen Scale…	motor - walking - gait - coordination - dcd - gross - skills - movement - toe - stereotypies	0.616355	FALSE
19590943	2013	1	14	Looking but not seeing: atypical visual scanning and recognition of faces in 2 and 4-year-old children with autism spectrum disorder.	3	3_gaze_eye_attention_tracking	['gaze', 'eye', 'attention', 'tracking', 'visual', 'social', 'faces', 'stimuli', 'face', 'looking']	["Eye-gaze methods offer numerous advantages for studying cognitive processes in children with autism spectrum disorder (ASD), but data loss may threaten the validity and generalizability of results. Some eye-gaze systems may be more vulnerable to data loss than others, but to our knowledge, this issue has not been empirically investigated. In the current study, we asked whether automatic eye-tra…	gaze - eye - attention - tracking - visual - social - faces - stimuli - face - looking	0.132532	FALSE
19592726	2016	4	23	Designing affective video games to support the social-emotional development of teenagers with autism spectrum disorders.	109	109_virtual_vr_reality_based	['virtual', 'vr', 'reality', 'based', 'skills', 'game', 'intervention', 'la', 'technologies', 'immersive']	['Initially designed for the treatment of phobias, the use of virtual reality in phobic disorders has expanded to other mental health disorders such as posttraumatic stress disorder, substance-related disorders, eating disorders, psychosis, and autism spectrum disorder. The goal of this review is to provide an accessible understanding of why this approach is important for future practice, given i…	virtual - vr - reality - based - skills - game - intervention - la - technologies - immersive	1	FALSE
19592739	2016	4	23	Facial Synthesys of 3D Avatars for Therapeutic Applications.	3	3_gaze_eye_attention_tracking	['gaze', 'eye', 'attention', 'tracking', 'visual', 'social', 'faces', 'stimuli', 'face', 'looking']	["Eye-gaze methods offer numerous advantages for studying cognitive processes in children with autism spectrum disorder (ASD), but data loss may threaten the validity and generalizability of results. Some eye-gaze systems may be more vulnerable to data loss than others, but to our knowledge, this issue has not been empirically investigated. In the current study, we asked whether automatic eye-tra…	gaze - eye - attention - tracking - visual - social - faces - stimuli - face - looking	0.0849016	FALSE
19593645	2013	1	14	Brief report: Increasing verbal greeting initiations for a student with autism via a Social Storyâ„¢ intervention.	115	115_play_pretend_intervention_peer	['play', 'pretend', 'intervention', 'peer', 'peers', 'skills', 'communication', 'children', 'parental', 'parents']	["Although the literature on parent-child interactions in young children with autism has examined dyadic style, synchrony, and sustained engagement, the examination of parental skill in sustaining and developing play skills themselves has not been targeted. This study examined the extent to which parents of young children with autism match and scaffold their child's play. Sixteen dyads of parents…	play - pretend - intervention - peer - peers - skills - communication - children - parental - parents	1	FALSE
19626433	2013	1	14	Discrepancies between self- and parent-perceptions of autistic traits and empathy in high functioning children and adolescents on the autism spectrum.	-1	-1_asd_autism_children_disorder	['asd', 'autism', 'children', 'disorder', 'social', 'spectrum', 'study', 'disorders', 'autistic', 'individuals']	["Whether parental psychiatric disorders are associated with autism spectrum disorder (ASD) in offspring has remained inconclusive. We examined the associations of parental psychiatric disorders with ASD in offspring. This population-based case-control study used Taiwan's National Health Insurance Research Database to identify a cohort of children born from 2004 to 2017 and their parents. A total…	asd - autism - children - disorder - social - spectrum - study - disorders - autistic - individuals	0.386558	FALSE
19915968	2016	2	2	A Comprehensive Profile of Decoding and Comprehension in Autism Spectrum Disorders.	73	73_reading_comprehension_literacy_writing	['reading', 'comprehension', 'literacy', 'writing', 'instruction', 'skills', 'print', 'students', 'read', 'vocabulary']	['The sources of reading comprehension difficulties in people with autism spectrum disorder (ASD) are still open to discussion. We explored their ability to adapt reading strategies to different reading goals using eye-tracking technology. A group of participants with ASD, and intelligence-, receptive oral language- and reading skills-matched control peers, read three stories under three differen…	reading - comprehension - literacy - writing - instruction - skills - print - students - read - vocabulary	0.198653	FALSE
19936908	2016	2	2	Brief Report: Question-Asking and Collateral Language Acquisition in Children with Autism.	124	124_aac_conversation_communication_tech	['aac', 'conversation', 'communication', 'tech', 'intervention', 'skills', 'pecs', 'augmentative', 'picture', 'exchange']	['The researchers designed a delayed intervention start randomized controlled trial to compare improvements in functional communication following augmentative and alternative communication (AAC) interventions. The study compared outcomes from function-based applied behavior analytic (ABA) and eclectic non-ABA forms of classroom-based communication strategies (waitlist control) as well as from hig…	aac - conversation - communication - tech - intervention - skills - pecs - augmentative - picture - exchange	1	FALSE
20177786	2014	4	8	Adenylosuccinate lyase deficiency in a Malaysian patient, with novel adenylosuccinate lyase gene mutations.	-1	-1_asd_autism_children_disorder	['asd', 'autism', 'children', 'disorder', 'social', 'spectrum', 'study', 'disorders', 'autistic', 'individuals']	["Whether parental psychiatric disorders are associated with autism spectrum disorder (ASD) in offspring has remained inconclusive. We examined the associations of parental psychiatric disorders with ASD in offspring. This population-based case-control study used Taiwan's National Health Insurance Research Database to identify a cohort of children born from 2004 to 2017 and their parents. A total…	asd - autism - children - disorder - social - spectrum - study - disorders - autistic - individuals	0.939555	FALSE
20393790	2015	11	17	Adaptive and Innate Immune Responses in Autism: Rationale for Therapeutic Use of Intravenous Immunoglobulin.	-1	-1_asd_autism_children_disorder	['asd', 'autism', 'children', 'disorder', 'social', 'spectrum', 'study', 'disorders', 'autistic', 'individuals']	["Whether parental psychiatric disorders are associated with autism spectrum disorder (ASD) in offspring has remained inconclusive. We examined the associations of parental psychiatric disorders with ASD in offspring. This population-based case-control study used Taiwan's National Health Insurance Research Database to identify a cohort of children born from 2004 to 2017 and their parents. A total…	asd - autism - children - disorder - social - spectrum - study - disorders - autistic - individuals	0.673802	FALSE
20411868	2015	9	12	Xerophthalmia and intracranial hypertension in an autistic child with vitamin A deficiency.	-1	-1_asd_autism_children_disorder	['asd', 'autism', 'children', 'disorder', 'social', 'spectrum', 'study', 'disorders', 'autistic', 'individuals']	["Whether parental psychiatric disorders are associated with autism spectrum disorder (ASD) in offspring has remained inconclusive. We examined the associations of parental psychiatric disorders with ASD in offspring. This population-based case-control study used Taiwan's National Health Insurance Research Database to identify a cohort of children born from 2004 to 2017 and their parents. A total…	asd - autism - children - disorder - social - spectrum - study - disorders - autistic - individuals	0.453969	FALSE
20452047	2014	6	3	The relationship between theory of mind and autobiographical memory in high-functioning autism and Asperger syndrome.	-1	-1_asd_autism_children_disorder	['asd', 'autism', 'children', 'disorder', 'social', 'spectrum', 'study', 'disorders', 'autistic', 'individuals']	["Whether parental psychiatric disorders are associated with autism spectrum disorder (ASD) in offspring has remained inconclusive. We examined the associations of parental psychiatric disorders with ASD in offspring. This population-based case-control study used Taiwan's National Health Insurance Research Database to identify a cohort of children born from 2004 to 2017 and their parents. A total…	asd - autism - children - disorder - social - spectrum - study - disorders - autistic - individuals	0.604724	FALSE
20452058	2014	6	3	Family-based association study of microsatellites in the 5' flanking region of AVPR1A with autism spectrum disorder in the Korean population.	57	57_snps_association_genetic_polymorphisms	['snps', 'association', 'genetic', 'polymorphisms', 'genome', 'allele', 'gene', 'haplotype', 'wide', 'genes']	["Autism spectrum disorder (ASD) is neurodevelopmental disorder characterized by stereotyped behavior and deficits in communication and social interactions. To date, numerous studies have investigated the associations between genetic variants and ASD risk. However, the results of these published studies lack a clear consensus. In the present study, we performed a systematic review on the associat…	snps - association - genetic - polymorphisms - genome - allele - gene - haplotype - wide - genes	0.598137	FALSE
20471104	2014	6	3	Schizotypy and altered digit ratios: a second look.	-1	-1_asd_autism_children_disorder	['asd', 'autism', 'children', 'disorder', 'social', 'spectrum', 'study', 'disorders', 'autistic', 'individuals']	["Whether parental psychiatric disorders are associated with autism spectrum disorder (ASD) in offspring has remained inconclusive. We examined the associations of parental psychiatric disorders with ASD in offspring. This population-based case-control study used Taiwan's National Health Insurance Research Database to identify a cohort of children born from 2004 to 2017 and their parents. A total…	asd - autism - children - disorder - social - spectrum - study - disorders - autistic - individuals	0.780457	FALSE
20480396	2014	4	8	Aminoacylase 1 deficiency associated with autistic behavior.	52	52_metabolic_metabolism_amino_metabolites	['metabolic', 'metabolism', 'amino', 'metabolites', 'acid', 'acids', 'eacute', 'aacute', 'urine', 'plasma']	['Although developmental delays affect learning, language, and behavior, some evidence suggests the presence of disturbances in metabolism are associated with psychiatric disorders. Here, the plasma metabolic phenotype of children with autism spectrum disorder (ASD, n\u2009=\u2009167), idiopathic-developmental delay (i-DD, n\u2009=\u200951), and Down syndrome (DS, n\u2009=\u200931), as compared t…	metabolic - metabolism - amino - metabolites - acid - acids - eacute - aacute - urine - plasma	0.225801	FALSE
20557481	2015	11	23	An event-related source localization study of response monitoring and social impairments in autism spectrum disorder.	-1	-1_asd_autism_children_disorder	['asd', 'autism', 'children', 'disorder', 'social', 'spectrum', 'study', 'disorders', 'autistic', 'individuals']	["Whether parental psychiatric disorders are associated with autism spectrum disorder (ASD) in offspring has remained inconclusive. We examined the associations of parental psychiatric disorders with ASD in offspring. This population-based case-control study used Taiwan's National Health Insurance Research Database to identify a cohort of children born from 2004 to 2017 and their parents. A total…	asd - autism - children - disorder - social - spectrum - study - disorders - autistic - individuals	0.690382	FALSE
20845086	2013	1	14	Evaluation of oxidative stress in autism: defective antioxidant enzymes and increased lipid peroxidation.	81	81_oxidative_stress_antioxidant_glutathione	['oxidative', 'stress', 'antioxidant', 'glutathione', 'gsh', 'plasma', 'levels', 'gssg', 'sod', 'redox']	['Despite increasing evidence of oxidative stress in the pathophysiology of autism, most studies have not evaluated biomarkers within specific brain regions, and the functional consequences of oxidative stress remain relatively understudied. We examined frozen samples from the cerebellum and temporal cortex (Brodmann area 22 (BA22)) from individuals with autism and unaffected controls (n=15 and n…	oxidative - stress - antioxidant - glutathione - gsh - plasma - levels - gssg - sod - redox	1	FALSE
20877735	2013	8	23	Periodontal status and orthodontic treatment need of autistic children.	27	27_dental_oral_care_caries	['dental', 'oral', 'care', 'caries', 'hygiene', 'health', 'dmft', 'teeth', 'children', 'orthodontic']	['Autism spectrum disorder (ASD) is characterized by impairments in social interaction and communication, restricted patterns of behaviour, and unusual sensory sensitivities. The hypotheses to be tested were that adult patients with ASD have a higher caries prevalence, have more risk factors for caries development, and utilize dental health care to a lesser extent than people recruited from the n…	dental - oral - care - caries - hygiene - health - dmft - teeth - children - orthodontic	0.886584	FALSE
21151713	2013	2	20	Children with high functioning autism show increased prefrontal and temporal cortex activity during error monitoring.	-1	-1_asd_autism_children_disorder	['asd', 'autism', 'children', 'disorder', 'social', 'spectrum', 'study', 'disorders', 'autistic', 'individuals']	["Whether parental psychiatric disorders are associated with autism spectrum disorder (ASD) in offspring has remained inconclusive. We examined the associations of parental psychiatric disorders with ASD in offspring. This population-based case-control study used Taiwan's National Health Insurance Research Database to identify a cohort of children born from 2004 to 2017 and their parents. A total…	asd - autism - children - disorder - social - spectrum - study - disorders - autistic - individuals	0.691366	FALSE
21172129	2016	4	23	[Mental health state of parents of children with autism].	4	4_parenting_stress_mothers_parents	['parenting', 'stress', 'mothers', 'parents', 'coping', 'child', 'fathers', 'family', 'parental', 'support']	['The aim of the study was to investigate the perception of the family functioning in parents of children with autism spectrum disorders (ASD) with normal-range intelligence and the relationships between family functioning, parenting stress and quality of life. Dyads of parents of children with ASD without intellectual disability and parents of typically developing children (controls) completed a…	parenting - stress - mothers - parents - coping - child - fathers - family - parental - support	0.202752	FALSE
21176760	2013	1	3	Safety review: squalene and thimerosal in vaccines.	66	66_vaccine_vaccination_vaccines_mmr	['vaccine', 'vaccination', 'vaccines', 'mmr', 'measles', 'media', 'thimerosal', 'influenza', 'hesitancy', 'tweets']	['Vaccine hesitancy is defined as a delay in acceptance, or refusal, of vaccines, despite availability. It is a complex and context specific phenomenon and identified as a global health priority. The "Parent Attitudes about Childhood Vaccines" (PACV) questionnaire is a validated tool for identifying vaccine hesitancy. Our aim was to use the PACV to assess vaccine hesitancy and its relationship wi…	vaccine - vaccination - vaccines - mmr - measles - media - thimerosal - influenza - hesitancy - tweets	0.13056	FALSE
21285894	2015	1	12	Social participation in a nationally representative sample of older youth and young adults with autism.	106	106_participation_activities_education_school	['participation', 'activities', 'education', 'school', 'transition', 'community', 'sen', 'youth', 'policies', 'mainstream']	["Participation is essential to children's development and is a major focus of intervention. This study aimed to describe the participation patterns of children with ASD, in comparison to typically developing (TD) children.70 preschoolers participated: 33 children with ASD, attending non-inclusive-education settings; and 37 TD children, attending mainstream educational settings. Two occupational …	participation - activities - education - school - transition - community - sen - youth - policies - mainstream	1	FALSE
21401819	2014	12	9	Expressive morphosyntax in boys with Fragile X syndrome with and without autism spectrum disorder.	59	59_fxs_fragile_syndrome_boys	['fxs', 'fragile', 'syndrome', 'boys', 'premutation', 'males', 'anxiety', 'fmr1', 'social', 'language']	['Fragile X syndrome (FXS) is the most common known genetic cause of autism spectrum disorder (ASD). Although 50-75\u2009% of children with FXS meet ASD criteria, no studies have compared ASD symptoms in infants with FXS versus other high risk groups, such as siblings of children with ASD (ASIBs). Using the Autism Observation Scale for Infants, our findings indicate that 53\u2009% of 12-month inf…	fxs - fragile - syndrome - boys - premutation - males - anxiety - fmr1 - social - language	0.15773	FALSE
21458972	2016	7	14	[Social skills training groups for children and adolescents with Asperger syndrome: A review].	0	0_diagnostic_screening_dsm_diagnosis	['diagnostic', 'screening', 'dsm', 'diagnosis', 'autism', 'ados', 'chat', 'months', 'developmental', 'specificity']	["The Modified Checklist for Autism in Toddlers (M-CHAT) could be appropriate for universal screening for autism spectrum disorder (ASD) at 18 months and 24 months. Validation studies, however, reported differences in psychometric properties across sample populations. This meta-analysis summarized its accuracy measures and quantified their change in relation to patient and study characteristics.F…	diagnostic - screening - dsm - diagnosis - autism - ados - chat - months - developmental - specificity	0.188213	FALSE
21465627	2013	4	30	Enhanced visual functioning in autism: an ALE meta-analysis.	10	10_memory_visual_processing_perceptual	['memory', 'visual', 'processing', 'perceptual', 'task', 'motion', 'perception', 'local', 'tasks', 'global']	['What does an individual with autism spectrum disorder (ASD) perceive first: the forest or the trees? In spite of 30 years of research and influential theories like the weak central coherence (WCC) theory and the enhanced perceptual functioning (EPF) account, the interplay of local and global visual processing in ASD remains only partly understood. Research findings vary in indicating a local pr…	memory - visual - processing - perceptual - task - motion - perception - local - tasks - global	0.14253	FALSE
21470330	2013	3	14	Self-reported mental health of mothers with a school-aged child with a disability in Victoria: a mixed method study.	11	11_sleep_problems_disturbances_daytime	['sleep', 'problems', 'disturbances', 'daytime', 'children', 'cshq', 'insomnia', 'disturbance', 'night', 'quality']	["Sleep is an important biological necessity, a lack of which can have many cognitive, psychological, social, and physical impacts. Children with autism are known to present with sleep difficulties more frequently than their typically developing peers but despite this, there is relatively little research looking at the impact of sleep on the family. To investigate the effect of sleep on families …	sleep - problems - disturbances - daytime - children - cshq - insomnia - disturbance - night - quality	0.132091	FALSE
21502871	2015	1	12	Characterization of depression in children with autism spectrum disorders.	93	93_depression_depressive_symptoms_depressed	['depression', 'depressive', 'symptoms', 'depressed', 'rumination', 'mood', 'autistic', 'adults', 'self', 'job']	['In adults with autism spectrum disorder, co-occurring psychiatric conditions are prevalent, and depression is one of the most common co-occurring disorders. This study examined the relationship between depression and cognitive ability, autism symptom severity, and self-reported social impairments in autism spectrum disorder. A total of 33 adults with autism spectrum disorder and 28 adults with …	depression - depressive - symptoms - depressed - rumination - mood - autistic - adults - self - job	1	FALSE
21573835	2014	12	10	Adaptive behavior in toddlers under two with autism spectrum disorders.	-1	-1_asd_autism_children_disorder	['asd', 'autism', 'children', 'disorder', 'social', 'spectrum', 'study', 'disorders', 'autistic', 'individuals']	["Whether parental psychiatric disorders are associated with autism spectrum disorder (ASD) in offspring has remained inconclusive. We examined the associations of parental psychiatric disorders with ASD in offspring. This population-based case-control study used Taiwan's National Health Insurance Research Database to identify a cohort of children born from 2004 to 2017 and their parents. A total…	asd - autism - children - disorder - social - spectrum - study - disorders - autistic - individuals	0.640323	FALSE
21575074	2014	12	10	Literacy skills in primary school-aged children with pragmatic language impairment: a comparison with children with specific language impairment.	1	1_language_children_speech_expressive	['language', 'children', 'speech', 'expressive', 'verbal', 'vocabulary', 'pragmatic', 'words', 'word', 'communication']	['Both small-scale and epidemiological longitudinal studies of early language delay indicate that most late talkers attain language scores in the average range by age 5, 6, or 7. However, late talker groups typically obtain significantly lower scores than groups with typical language histories on most language measures into adolescence. These findings support a dimensional account of language del…	language - children - speech - expressive - verbal - vocabulary - pragmatic - words - word - communication	0.59121	FALSE
21610185	2013	4	17	Perception of mirror symmetry in autism spectrum disorders.	100	100_face_faces_recognition_aftereffects	['face', 'faces', 'recognition', 'aftereffects', 'identity', 'processing', 'coding', 'facial', 'individuals', 'inversion']	['There are few direct examinations of whether face-processing difficulties in autism are disproportionate to difficulties with other complex non-face stimuli. Here we examined discrimination ability and memory for faces, cars, and inverted faces in children and adolescents with and without autism. Results showed that, relative to typical children, the difficulties of children and adolescents wit…	face - faces - recognition - aftereffects - identity - processing - coding - facial - individuals - inversion	1	FALSE
21610187	2013	8	27	Evaluation of the revised algorithm of Autism Diagnostic Observation Schedule (ADOS) in the diagnostic investigation of high-functioning children and adolescents with autism spectrum disorders.	0	0_diagnostic_screening_dsm_diagnosis	['diagnostic', 'screening', 'dsm', 'diagnosis', 'autism', 'ados', 'chat', 'months', 'developmental', 'specificity']	["The Modified Checklist for Autism in Toddlers (M-CHAT) could be appropriate for universal screening for autism spectrum disorder (ASD) at 18 months and 24 months. Validation studies, however, reported differences in psychometric properties across sample populations. This meta-analysis summarized its accuracy measures and quantified their change in relation to patient and study characteristics.F…	diagnostic - screening - dsm - diagnosis - autism - ados - chat - months - developmental - specificity	0.623745	FALSE
21610188	2013	3	1	'I just don't fit anywhere': support experiences and future support needs of individuals with Asperger syndrome in middle adulthood.	0	0_diagnostic_screening_dsm_diagnosis	['diagnostic', 'screening', 'dsm', 'diagnosis', 'autism', 'ados', 'chat', 'months', 'developmental', 'specificity']	["The Modified Checklist for Autism in Toddlers (M-CHAT) could be appropriate for universal screening for autism spectrum disorder (ASD) at 18 months and 24 months. Validation studies, however, reported differences in psychometric properties across sample populations. This meta-analysis summarized its accuracy measures and quantified their change in relation to patient and study characteristics.F…	diagnostic - screening - dsm - diagnosis - autism - ados - chat - months - developmental - specificity	0.134884	FALSE
21690082	2013	3	1	Evaluation of the criterion and convergent validity of the Diagnostic Interview for Social and Communication Disorders in young and low-functioning children.	0	0_diagnostic_screening_dsm_diagnosis	['diagnostic', 'screening', 'dsm', 'diagnosis', 'autism', 'ados', 'chat', 'months', 'developmental', 'specificity']	["The Modified Checklist for Autism in Toddlers (M-CHAT) could be appropriate for universal screening for autism spectrum disorder (ASD) at 18 months and 24 months. Validation studies, however, reported differences in psychometric properties across sample populations. This meta-analysis summarized its accuracy measures and quantified their change in relation to patient and study characteristics.F…	diagnostic - screening - dsm - diagnosis - autism - ados - chat - months - developmental - specificity	0.337937	FALSE
21715547	2013	9	3	Does central coherence relate to the cognitive performance of children with autism in dynamic assessments?	1	1_language_children_speech_expressive	['language', 'children', 'speech', 'expressive', 'verbal', 'vocabulary', 'pragmatic', 'words', 'word', 'communication']	['Both small-scale and epidemiological longitudinal studies of early language delay indicate that most late talkers attain language scores in the average range by age 5, 6, or 7. However, late talker groups typically obtain significantly lower scores than groups with typical language histories on most language measures into adolescence. These findings support a dimensional account of language del…	language - children - speech - expressive - verbal - vocabulary - pragmatic - words - word - communication	0.254189	FALSE
21729335	2016	4	22	Autism.	-1	-1_asd_autism_children_disorder	['asd', 'autism', 'children', 'disorder', 'social', 'spectrum', 'study', 'disorders', 'autistic', 'individuals']	["Whether parental psychiatric disorders are associated with autism spectrum disorder (ASD) in offspring has remained inconclusive. We examined the associations of parental psychiatric disorders with ASD in offspring. This population-based case-control study used Taiwan's National Health Insurance Research Database to identify a cohort of children born from 2004 to 2017 and their parents. A total…	asd - autism - children - disorder - social - spectrum - study - disorders - autistic - individuals	0.396785	FALSE
21731598	2013	5	21	Temporal dynamics reveal atypical brain response to social exclusion in autism.	105	105_reward_rewards_anticipation_social	['reward', 'rewards', 'anticipation', 'social', 'monetary', 'nonsocial', 'processing', 'rewarding', 'stimuli', 'task']	['In autism spectrum disorders (ASD), social motivation theories suggest that the core social communication problems seen in children with ASD arise from diminished responsiveness to social reward. Although clinical and experimental data support these theories, the extent to which the reward deficit in ASD is unique for social rewards remains unclear. With the present investigation, we aimed to p…	reward - rewards - anticipation - social - monetary - nonsocial - processing - rewarding - stimuli - task	1	FALSE
21743819	2013	5	21	Enhanced neural responses to rule violation in children with autism: a comparison to social exclusion.	-1	-1_asd_autism_children_disorder	['asd', 'autism', 'children', 'disorder', 'social', 'spectrum', 'study', 'disorders', 'autistic', 'individuals']	["Whether parental psychiatric disorders are associated with autism spectrum disorder (ASD) in offspring has remained inconclusive. We examined the associations of parental psychiatric disorders with ASD in offspring. This population-based case-control study used Taiwan's National Health Insurance Research Database to identify a cohort of children born from 2004 to 2017 and their parents. A total…	asd - autism - children - disorder - social - spectrum - study - disorders - autistic - individuals	0.160307	FALSE
21788254	2013	9	3	Factors affecting the age at diagnosis of autism spectrum disorders in Nova Scotia, Canada.	23	23_prevalence_surveillance_addm_years	['prevalence', 'surveillance', 'addm', 'years', 'incidence', 'aged', 'diagnosis', '000', 'children', 'hispanic']	["Autism spectrum disorder (ASD).2010.The Autism and Developmental Disabilities Monitoring (ADDM) Network is an active surveillance system in the United States that provides estimates of the prevalence of ASD and other characteristics among children aged 8 years whose parents or guardians live in 11 ADDM sites in the United States. ADDM surveillance is conducted in two phases. The first phase con…	prevalence - surveillance - addm - years - incidence - aged - diagnosis - 000 - children - hispanic	0.160373	FALSE
21788255	2014	2	19	Fatigue, wellbeing and parental self-efficacy in mothers of children with an autism spectrum disorder.	4	4_parenting_stress_mothers_parents	['parenting', 'stress', 'mothers', 'parents', 'coping', 'child', 'fathers', 'family', 'parental', 'support']	['The aim of the study was to investigate the perception of the family functioning in parents of children with autism spectrum disorders (ASD) with normal-range intelligence and the relationships between family functioning, parenting stress and quality of life. Dyads of parents of children with ASD without intellectual disability and parents of typically developing children (controls) completed a…	parenting - stress - mothers - parents - coping - child - fathers - family - parental - support	0.195424	FALSE
21801163	2013	7	5	Corpus callosum abnormalities, intellectual disability, speech impairment, and autism in patients with haploinsufficiency of ARID1B.	41	41_variants_sequencing_exome_variant	['variants', 'sequencing', 'exome', 'variant', 'pathogenic', 'delay', 'intellectual', 'patients', 'disability', 'features']	['gene have been identified as a cause of a unique neurodevelopmental disorder with variable combination of global developmental delay or isolated speech delay, intellectual disability, autistic features, and seizures.-related neurodevelopmental disorder. Articles were identified through search engines using appropriate search terms.Along with the presented 2 cases, 40 cases were analyzed. Out of…	variants - sequencing - exome - variant - pathogenic - delay - intellectual - patients - disability - features	1	FALSE
21810909	2013	3	1	Confusion and inconsistency in diagnosis of Asperger syndrome: a review of studies from 1981 to 2010.	0	0_diagnostic_screening_dsm_diagnosis	['diagnostic', 'screening', 'dsm', 'diagnosis', 'autism', 'ados', 'chat', 'months', 'developmental', 'specificity']	["The Modified Checklist for Autism in Toddlers (M-CHAT) could be appropriate for universal screening for autism spectrum disorder (ASD) at 18 months and 24 months. Validation studies, however, reported differences in psychometric properties across sample populations. This meta-analysis summarized its accuracy measures and quantified their change in relation to patient and study characteristics.F…	diagnostic - screening - dsm - diagnosis - autism - ados - chat - months - developmental - specificity	0.192455	FALSE
21810911	2013	4	17	Listeners prefer the laughs of children with autism to those of typically developing children.	-1	-1_asd_autism_children_disorder	['asd', 'autism', 'children', 'disorder', 'social', 'spectrum', 'study', 'disorders', 'autistic', 'individuals']	["Whether parental psychiatric disorders are associated with autism spectrum disorder (ASD) in offspring has remained inconclusive. We examined the associations of parental psychiatric disorders with ASD in offspring. This population-based case-control study used Taiwan's National Health Insurance Research Database to identify a cohort of children born from 2004 to 2017 and their parents. A total…	asd - autism - children - disorder - social - spectrum - study - disorders - autistic - individuals	0.605999	FALSE
21833759	2013	4	2	Access to care for children with autism in the context of state Medicaid reimbursement.	34	34_costs_medicaid_care_cost	['costs', 'medicaid', 'care', 'cost', 'ed', 'services', 'health', 'utilization', 'emergency', 'spending']	['Individuals with intellectual and/or developmental disabilities (IDD) tend to incur high health care costs. The Neurobehavior HOME Program (HOME) is an interdisciplinary program that cares for this population. This study will evaluate the health care costs and utilization of individuals during their first year of enrollment in HOME and identify factors associated with higher cost and utilizatio…	costs - medicaid - care - cost - ed - services - health - utilization - emergency - spending	1	FALSE
21846665	2013	4	17	Increasing verbal responsiveness in parents of children with autism:a pilot study.	-1	-1_asd_autism_children_disorder	['asd', 'autism', 'children', 'disorder', 'social', 'spectrum', 'study', 'disorders', 'autistic', 'individuals']	["Whether parental psychiatric disorders are associated with autism spectrum disorder (ASD) in offspring has remained inconclusive. We examined the associations of parental psychiatric disorders with ASD in offspring. This population-based case-control study used Taiwan's National Health Insurance Research Database to identify a cohort of children born from 2004 to 2017 and their parents. A total…	asd - autism - children - disorder - social - spectrum - study - disorders - autistic - individuals	0.474756	FALSE
21846667	2013	4	17	Prevalence and correlates of autism in a state psychiatric hospital.	0	0_diagnostic_screening_dsm_diagnosis	['diagnostic', 'screening', 'dsm', 'diagnosis', 'autism', 'ados', 'chat', 'months', 'developmental', 'specificity']	["The Modified Checklist for Autism in Toddlers (M-CHAT) could be appropriate for universal screening for autism spectrum disorder (ASD) at 18 months and 24 months. Validation studies, however, reported differences in psychometric properties across sample populations. This meta-analysis summarized its accuracy measures and quantified their change in relation to patient and study characteristics.F…	diagnostic - screening - dsm - diagnosis - autism - ados - chat - months - developmental - specificity	1	FALSE
21911305	2013	2	4	A potential pathogenic role of oxalate in autism.	81	81_oxidative_stress_antioxidant_glutathione	['oxidative', 'stress', 'antioxidant', 'glutathione', 'gsh', 'plasma', 'levels', 'gssg', 'sod', 'redox']	['Despite increasing evidence of oxidative stress in the pathophysiology of autism, most studies have not evaluated biomarkers within specific brain regions, and the functional consequences of oxidative stress remain relatively understudied. We examined frozen samples from the cerebellum and temporal cortex (Brodmann area 22 (BA22)) from individuals with autism and unaffected controls (n=15 and n…	oxidative - stress - antioxidant - glutathione - gsh - plasma - levels - gssg - sod - redox	0.458597	FALSE
21916929	2013	3	27	Parent views of the positive contributions of elementary and high school-aged children with autism spectrum disorders and Down syndrome.	-1	-1_asd_autism_children_disorder	['asd', 'autism', 'children', 'disorder', 'social', 'spectrum', 'study', 'disorders', 'autistic', 'individuals']	["Whether parental psychiatric disorders are associated with autism spectrum disorder (ASD) in offspring has remained inconclusive. We examined the associations of parental psychiatric disorders with ASD in offspring. This population-based case-control study used Taiwan's National Health Insurance Research Database to identify a cohort of children born from 2004 to 2017 and their parents. A total…	asd - autism - children - disorder - social - spectrum - study - disorders - autistic - individuals	0.460745	FALSE
21949004	2013	4	17	Motor proficiency and emotional/behavioural disturbance in autism and Asperger's disorder: another piece of the neurological puzzle?	32	32_motor_walking_gait_coordination	['motor', 'walking', 'gait', 'coordination', 'dcd', 'gross', 'skills', 'movement', 'toe', 'stereotypies']	['Delays within the motor domain are often overlooked as an early surveillance marker for autism. The present study evaluated motor difficulties and its potential as an early predictive marker for later autism likelihood in a cohort of infants (N\xa0=\xa096) showing early behavioral signs of autism aged 9-14\u2009months. The motor domain was evaluated using the motor subscales of the Mullen Scale…	motor - walking - gait - coordination - dcd - gross - skills - movement - toe - stereotypies	1	FALSE
21949005	2013	9	3	Learning through interaction in children with autism: preliminary data from asocial-communication-based intervention.	-1	-1_asd_autism_children_disorder	['asd', 'autism', 'children', 'disorder', 'social', 'spectrum', 'study', 'disorders', 'autistic', 'individuals']	["Whether parental psychiatric disorders are associated with autism spectrum disorder (ASD) in offspring has remained inconclusive. We examined the associations of parental psychiatric disorders with ASD in offspring. This population-based case-control study used Taiwan's National Health Insurance Research Database to identify a cohort of children born from 2004 to 2017 and their parents. A total…	asd - autism - children - disorder - social - spectrum - study - disorders - autistic - individuals	0.0357895	FALSE
21975036	2013	9	3	Autobiographical memory in adults with autism spectrum disorder: the role of depressed mood, rumination, working memory and theory of mind.	93	93_depression_depressive_symptoms_depressed	['depression', 'depressive', 'symptoms', 'depressed', 'rumination', 'mood', 'autistic', 'adults', 'self', 'job']	['In adults with autism spectrum disorder, co-occurring psychiatric conditions are prevalent, and depression is one of the most common co-occurring disorders. This study examined the relationship between depression and cognitive ability, autism symptom severity, and self-reported social impairments in autism spectrum disorder. A total of 33 adults with autism spectrum disorder and 28 adults with …	depression - depressive - symptoms - depressed - rumination - mood - autistic - adults - self - job	0.204922	FALSE
21975037	2013	9	3	Feasibility of exposure response prevention to treat repetitive behaviors of children with autism and an intellectual disability: a brief report.	82	82_ocd_compulsive_obsessive_hoarding	['ocd', 'compulsive', 'obsessive', 'hoarding', 'cbt', 'oc', 'bocs', 'symptoms', 'treatment', 'obsessions']	['Obsessive-compulsive disorder (OCD) and autism spectrum disorders (ASD) commonly co-occur and are considered challenging to manage when they co-occur in youth. However, clinical characteristics and prognosis of this group remain poorly understood. This study examined the prevalence, clinical correlates and outcomes of paediatric OCD co-occurring with ASD (OCD\u2009+\u2009ASD) in a large clinica…	ocd - compulsive - obsessive - hoarding - cbt - oc - bocs - symptoms - treatment - obsessions	1	FALSE
21985898	2013	1	17	Epidemiological designs for vaccine safety assessment: methods and pitfalls.	66	66_vaccine_vaccination_vaccines_mmr	['vaccine', 'vaccination', 'vaccines', 'mmr', 'measles', 'media', 'thimerosal', 'influenza', 'hesitancy', 'tweets']	['Vaccine hesitancy is defined as a delay in acceptance, or refusal, of vaccines, despite availability. It is a complex and context specific phenomenon and identified as a global health priority. The "Parent Attitudes about Childhood Vaccines" (PACV) questionnaire is a validated tool for identifying vaccine hesitancy. Our aim was to use the PACV to assess vaccine hesitancy and its relationship wi…	vaccine - vaccination - vaccines - mmr - measles - media - thimerosal - influenza - hesitancy - tweets	1	FALSE
22017703	2013	3	27	Ensuring successful admission to hospital for young people with learning difficulties, autism and challenging behaviour: a continuous quality improvement and change management programme.	-1	-1_asd_autism_children_disorder	['asd', 'autism', 'children', 'disorder', 'social', 'spectrum', 'study', 'disorders', 'autistic', 'individuals']	["Whether parental psychiatric disorders are associated with autism spectrum disorder (ASD) in offspring has remained inconclusive. We examined the associations of parental psychiatric disorders with ASD in offspring. This population-based case-control study used Taiwan's National Health Insurance Research Database to identify a cohort of children born from 2004 to 2017 and their parents. A total…	asd - autism - children - disorder - social - spectrum - study - disorders - autistic - individuals	0.189324	FALSE
22021093	2013	6	4	Brain growth rate abnormalities visualized in adolescents with autism.	19	19_volume_cortical_brain_matter	['volume', 'cortical', 'brain', 'matter', 'thickness', 'gray', 'gm', 'structural', 'volumes', 'surface']	['Results on grey matter (GM) structural alterations in autism spectrum disorder (ASD) are inconclusive. Moreover, little is known about age effects on brain-structure abnormalities in ASD beyond childhood. Here, we aimed to examine regional GM volumes in a large sample of children, adolescents, and adults with ASD. Magnetic resonance imaging scans were obtained in 47 male ASD subjects and 51 mat…	volume - cortical - brain - matter - thickness - gray - gm - structural - volumes - surface	0.631999	FALSE
22026573	2014	12	9	Acquisition of Turkish grammatical morphology by children with developmental disorders.	1	1_language_children_speech_expressive	['language', 'children', 'speech', 'expressive', 'verbal', 'vocabulary', 'pragmatic', 'words', 'word', 'communication']	['Both small-scale and epidemiological longitudinal studies of early language delay indicate that most late talkers attain language scores in the average range by age 5, 6, or 7. However, late talker groups typically obtain significantly lower scores than groups with typical language histories on most language measures into adolescence. These findings support a dimensional account of language del…	language - children - speech - expressive - verbal - vocabulary - pragmatic - words - word - communication	0.648432	FALSE
22040464	2014	7	16	Autism in Glasgow: cumulative incidence and the effects of referral age, deprivation and geographical location.	23	23_prevalence_surveillance_addm_years	['prevalence', 'surveillance', 'addm', 'years', 'incidence', 'aged', 'diagnosis', '000', 'children', 'hispanic']	["Autism spectrum disorder (ASD).2010.The Autism and Developmental Disabilities Monitoring (ADDM) Network is an active surveillance system in the United States that provides estimates of the prevalence of ASD and other characteristics among children aged 8 years whose parents or guardians live in 11 ADDM sites in the United States. ADDM surveillance is conducted in two phases. The first phase con…	prevalence - surveillance - addm - years - incidence - aged - diagnosis - 000 - children - hispanic	1	FALSE
22042307	2013	1	14	The big picture: storytelling ability in adults with autism spectrum conditions.	1	1_language_children_speech_expressive	['language', 'children', 'speech', 'expressive', 'verbal', 'vocabulary', 'pragmatic', 'words', 'word', 'communication']	['Both small-scale and epidemiological longitudinal studies of early language delay indicate that most late talkers attain language scores in the average range by age 5, 6, or 7. However, late talker groups typically obtain significantly lower scores than groups with typical language histories on most language measures into adolescence. These findings support a dimensional account of language del…	language - children - speech - expressive - verbal - vocabulary - pragmatic - words - word - communication	0.0876232	FALSE
22042308	2013	1	14	Empathic responding in toddlers at risk for an autism spectrum disorder.	72	72_empathy_empathic_traits_emotional	['empathy', 'empathic', 'traits', 'emotional', 'moral', 'eq', 'pain', 'self', 'cu', 'emotion']	['The Empathy Quotient (EQ) self-report questionnaire is used to measure empathy in individuals with clinical conditions that have been associated with social impairments. In this study, older teens and adults with autism spectrum disorder (ASD; N\u202f=\u202f60), early psychosis (EP; N\u202f=\u202f51) and social anxiety disorder (SAD; N\u202f=\u202f71) and neurotypical controls (NT; N\u202f=\u20…	empathy - empathic - traits - emotional - moral - eq - pain - self - cu - emotion	1	FALSE
22042309	2013	1	14	Using individualized reinforcers and hierarchical exposure to increase food flexibility in children with autism spectrum disorders.	22	22_food_feeding_mealtime_eating	['food', 'feeding', 'mealtime', 'eating', 'selectivity', 'foods', 'intake', 'children', 'dietary', 'nutrition']	['Autism spectrum disorders (ASD) are characterized by impairments in social interaction, communication, and restricted, stereotyped behavior. Gastrointestinal (GI), nutritional, and feeding problems are often reported in ASD. We investigated the prevalence of GI symptoms, food selectivity, and mealtime difficulties, and their associations with dietary interventions, food supplement use, and beha…	food - feeding - mealtime - eating - selectivity - foods - intake - children - dietary - nutrition	0.260676	FALSE
22047968	2013	1	31	Is there a common neuroanatomical substrate of language deficit between autism spectrum disorder and specific language impairment?	-1	-1_asd_autism_children_disorder	['asd', 'autism', 'children', 'disorder', 'social', 'spectrum', 'study', 'disorders', 'autistic', 'individuals']	["Whether parental psychiatric disorders are associated with autism spectrum disorder (ASD) in offspring has remained inconclusive. We examined the associations of parental psychiatric disorders with ASD in offspring. This population-based case-control study used Taiwan's National Health Insurance Research Database to identify a cohort of children born from 2004 to 2017 and their parents. A total…	asd - autism - children - disorder - social - spectrum - study - disorders - autistic - individuals	0.724882	FALSE
22068821	2013	1	14	Audiovisual speech perception and eye gaze behavior of adults with asperger syndrome.	-1	-1_asd_autism_children_disorder	['asd', 'autism', 'children', 'disorder', 'social', 'spectrum', 'study', 'disorders', 'autistic', 'individuals']	["Whether parental psychiatric disorders are associated with autism spectrum disorder (ASD) in offspring has remained inconclusive. We examined the associations of parental psychiatric disorders with ASD in offspring. This population-based case-control study used Taiwan's National Health Insurance Research Database to identify a cohort of children born from 2004 to 2017 and their parents. A total…	asd - autism - children - disorder - social - spectrum - study - disorders - autistic - individuals	0.779308	FALSE
22087041	2014	2	19	Learning of idiomatic language expressions in a group intervention for children with autism.	1	1_language_children_speech_expressive	['language', 'children', 'speech', 'expressive', 'verbal', 'vocabulary', 'pragmatic', 'words', 'word', 'communication']	['Both small-scale and epidemiological longitudinal studies of early language delay indicate that most late talkers attain language scores in the average range by age 5, 6, or 7. However, late talker groups typically obtain significantly lower scores than groups with typical language histories on most language measures into adolescence. These findings support a dimensional account of language del…	language - children - speech - expressive - verbal - vocabulary - pragmatic - words - word - communication	0.202332	FALSE
22087043	2014	2	19	Friendship characteristics and activity patterns of adolescents with an autism spectrum disorder.	113	113_friendship_friendships_loneliness_friends	['friendship', 'friendships', 'loneliness', 'friends', 'telehealth', 'social', 'autistic', 'girls', 'adolescents', 'peers']	['There has been limited research exploring the similarity of perception of friendship quality between children with Autism Spectrum Disorder (ASD) and their friends. In this study, 45 children with ASD participated together with their friends. Two levels of friendship quality congruency were investigated: reciprocity and mutuality. A high proportion of the friendships were reciprocated for both …	friendship - friendships - loneliness - friends - telehealth - social - autistic - girls - adolescents - peers	1	FALSE
22087045	2013	4	17	A social competence intervention for young children with high functioning autism and Asperger syndrome: a pilot study.	-1	-1_asd_autism_children_disorder	['asd', 'autism', 'children', 'disorder', 'social', 'spectrum', 'study', 'disorders', 'autistic', 'individuals']	["Whether parental psychiatric disorders are associated with autism spectrum disorder (ASD) in offspring has remained inconclusive. We examined the associations of parental psychiatric disorders with ASD in offspring. This population-based case-control study used Taiwan's National Health Insurance Research Database to identify a cohort of children born from 2004 to 2017 and their parents. A total…	asd - autism - children - disorder - social - spectrum - study - disorders - autistic - individuals	0.160247	FALSE
22093185	2013	10	17	Autism-like behaviours with transient histone hyperacetylation in mice treated prenatally with valproic acid.	36	36_vpa_rats_valproic_exposure	['vpa', 'rats', 'valproic', 'exposure', 'exposed', 'zebrafish', 'acid', 'bpa', 'model', 'rat']	['Autism spectrum disorder (ASD) is a pervasive developmental disorder characterized by three main behavioral symptoms including social deficits, impaired communication, and stereotyped and repetitive behaviors. ASD prevalence shows gender bias to male. Prenatal exposure to valproic acid (VPA), a drug used in epilepsy and bipolar disorder, induces autistic symptoms in both human and rodents. As w…	vpa - rats - valproic - exposure - exposed - zebrafish - acid - bpa - model - rat	1	FALSE
22093691	2013	1	17	Early manifestations of autism spectrum disorders. Experience of 393 cases in a paediatric neurology.	-1	-1_asd_autism_children_disorder	['asd', 'autism', 'children', 'disorder', 'social', 'spectrum', 'study', 'disorders', 'autistic', 'individuals']	["Whether parental psychiatric disorders are associated with autism spectrum disorder (ASD) in offspring has remained inconclusive. We examined the associations of parental psychiatric disorders with ASD in offspring. This population-based case-control study used Taiwan's National Health Insurance Research Database to identify a cohort of children born from 2004 to 2017 and their parents. A total…	asd - autism - children - disorder - social - spectrum - study - disorders - autistic - individuals	0.120575	FALSE
22098722	2014	4	9	Might cholesterol sulfate deficiency contribute to the development of autistic spectrum disorder?	-1	-1_asd_autism_children_disorder	['asd', 'autism', 'children', 'disorder', 'social', 'spectrum', 'study', 'disorders', 'autistic', 'individuals']	["Whether parental psychiatric disorders are associated with autism spectrum disorder (ASD) in offspring has remained inconclusive. We examined the associations of parental psychiatric disorders with ASD in offspring. This population-based case-control study used Taiwan's National Health Insurance Research Database to identify a cohort of children born from 2004 to 2017 and their parents. A total…	asd - autism - children - disorder - social - spectrum - study - disorders - autistic - individuals	0.869195	FALSE
22102292	2013	1	14	Self-monitoring of gaze in high functioning autism.	3	3_gaze_eye_attention_tracking	['gaze', 'eye', 'attention', 'tracking', 'visual', 'social', 'faces', 'stimuli', 'face', 'looking']	["Eye-gaze methods offer numerous advantages for studying cognitive processes in children with autism spectrum disorder (ASD), but data loss may threaten the validity and generalizability of results. Some eye-gaze systems may be more vulnerable to data loss than others, but to our knowledge, this issue has not been empirically investigated. In the current study, we asked whether automatic eye-tra…	gaze - eye - attention - tracking - visual - social - faces - stimuli - face - looking	1	FALSE
22105140	2013	1	14	Do planning and visual integration difficulties underpin motor dysfunction in autism? A kinematic study of young children with autism.	32	32_motor_walking_gait_coordination	['motor', 'walking', 'gait', 'coordination', 'dcd', 'gross', 'skills', 'movement', 'toe', 'stereotypies']	['Delays within the motor domain are often overlooked as an early surveillance marker for autism. The present study evaluated motor difficulties and its potential as an early predictive marker for later autism likelihood in a cohort of infants (N\xa0=\xa096) showing early behavioral signs of autism aged 9-14\u2009months. The motor domain was evaluated using the motor subscales of the Mullen Scale…	motor - walking - gait - coordination - dcd - gross - skills - movement - toe - stereotypies	0.0477678	FALSE
22105141	2013	1	14	Exploring the relationship between autism spectrum disorder and epilepsy using latent class cluster analysis.	0	0_diagnostic_screening_dsm_diagnosis	['diagnostic', 'screening', 'dsm', 'diagnosis', 'autism', 'ados', 'chat', 'months', 'developmental', 'specificity']	["The Modified Checklist for Autism in Toddlers (M-CHAT) could be appropriate for universal screening for autism spectrum disorder (ASD) at 18 months and 24 months. Validation studies, however, reported differences in psychometric properties across sample populations. This meta-analysis summarized its accuracy measures and quantified their change in relation to patient and study characteristics.F…	diagnostic - screening - dsm - diagnosis - autism - ados - chat - months - developmental - specificity	0.129799	FALSE
22105142	2013	2	11	Predicting the academic achievement of gifted students with autism spectrum disorder.	-1	-1_asd_autism_children_disorder	['asd', 'autism', 'children', 'disorder', 'social', 'spectrum', 'study', 'disorders', 'autistic', 'individuals']	["Whether parental psychiatric disorders are associated with autism spectrum disorder (ASD) in offspring has remained inconclusive. We examined the associations of parental psychiatric disorders with ASD in offspring. This population-based case-control study used Taiwan's National Health Insurance Research Database to identify a cohort of children born from 2004 to 2017 and their parents. A total…	asd - autism - children - disorder - social - spectrum - study - disorders - autistic - individuals	0.829257	FALSE
22105143	2013	1	14	Normal rates of neuroradiological findings in children with high functioning autism.	-1	-1_asd_autism_children_disorder	['asd', 'autism', 'children', 'disorder', 'social', 'spectrum', 'study', 'disorders', 'autistic', 'individuals']	["Whether parental psychiatric disorders are associated with autism spectrum disorder (ASD) in offspring has remained inconclusive. We examined the associations of parental psychiatric disorders with ASD in offspring. This population-based case-control study used Taiwan's National Health Insurance Research Database to identify a cohort of children born from 2004 to 2017 and their parents. A total…	asd - autism - children - disorder - social - spectrum - study - disorders - autistic - individuals	0.556751	FALSE
22105621	2013	8	12	QTL replication and targeted association highlight the nerve growth factor gene for nonverbal communication deficits in autism spectrum disorders.	57	57_snps_association_genetic_polymorphisms	['snps', 'association', 'genetic', 'polymorphisms', 'genome', 'allele', 'gene', 'haplotype', 'wide', 'genes']	["Autism spectrum disorder (ASD) is neurodevelopmental disorder characterized by stereotyped behavior and deficits in communication and social interactions. To date, numerous studies have investigated the associations between genetic variants and ASD risk. However, the results of these published studies lack a clear consensus. In the present study, we performed a systematic review on the associat…	snps - association - genetic - polymorphisms - genome - allele - gene - haplotype - wide - genes	0.415175	FALSE
22106036	2013	6	20	Phenotype of FOXP2 haploinsufficiency in a mother and son.	-1	-1_asd_autism_children_disorder	['asd', 'autism', 'children', 'disorder', 'social', 'spectrum', 'study', 'disorders', 'autistic', 'individuals']	["Whether parental psychiatric disorders are associated with autism spectrum disorder (ASD) in offspring has remained inconclusive. We examined the associations of parental psychiatric disorders with ASD in offspring. This population-based case-control study used Taiwan's National Health Insurance Research Database to identify a cohort of children born from 2004 to 2017 and their parents. A total…	asd - autism - children - disorder - social - spectrum - study - disorders - autistic - individuals	0.659265	FALSE
22106044	2013	6	20	Long QT, syndactyly, joint contractures, stroke and novel CACNA1C mutation: expanding the spectrum of Timothy syndrome.	24	24_cacna1c_mutation_mutations_timothy	['cacna1c', 'mutation', 'mutations', 'timothy', 'gene', 'syndrome', 'qt', 'variant', 'variants', 'ts']	['Timothy syndrome is characterized by a unique combination of a prolongation of the corrected QT interval of the electrocardiogram and bilateral cutaneous syndactyly of the fingers and the toes and is caused by heterozygous mutations in CACNA1C, a gene encoding a calcium channel. After the discovery of the CACNA1C gene as the causative gene for Timothy syndrome, patients with CACNA1C mutations w…	cacna1c - mutation - mutations - timothy - gene - syndrome - qt - variant - variants - ts	0.0439496	FALSE
22113746	2013	1	14	Anticipation of action intentions in autism spectrum disorder.	3	3_gaze_eye_attention_tracking	['gaze', 'eye', 'attention', 'tracking', 'visual', 'social', 'faces', 'stimuli', 'face', 'looking']	["Eye-gaze methods offer numerous advantages for studying cognitive processes in children with autism spectrum disorder (ASD), but data loss may threaten the validity and generalizability of results. Some eye-gaze systems may be more vulnerable to data loss than others, but to our knowledge, this issue has not been empirically investigated. In the current study, we asked whether automatic eye-tra…	gaze - eye - attention - tracking - visual - social - faces - stimuli - face - looking	0.543378	FALSE
22139431	2013	1	14	Category formation in autism: can individuals with autism form categories and prototypes of dot patterns?	10	10_memory_visual_processing_perceptual	['memory', 'visual', 'processing', 'perceptual', 'task', 'motion', 'perception', 'local', 'tasks', 'global']	['What does an individual with autism spectrum disorder (ASD) perceive first: the forest or the trees? In spite of 30 years of research and influential theories like the weak central coherence (WCC) theory and the enhanced perceptual functioning (EPF) account, the interplay of local and global visual processing in ASD remains only partly understood. Research findings vary in indicating a local pr…	memory - visual - processing - perceptual - task - motion - perception - local - tasks - global	0.698046	FALSE
22146933	2013	1	14	Goal-directed and goal-less imitation in autism spectrum disorder.	35	35_imitation_motor_mirror_action	['imitation', 'motor', 'mirror', 'action', 'actions', 'movement', 'interpersonal', 'movements', 'synchrony', 'hand']	['Imitation is a potentially crucial aspect of social cognitive development. Although deficits in imitation ability have been widely demonstrated in autism spectrum disorder (ASD), the specificity and significance of the findings is unclear, due largely to methodological limitations. We developed a novel assessment of imitation ability, using objective movement parameters (path length and action …	imitation - motor - mirror - action - actions - movement - interpersonal - movements - synchrony - hand	1	FALSE
22146934	2013	1	14	Brief report: effect of a focused imitation intervention on social functioning in children with autism.	35	35_imitation_motor_mirror_action	['imitation', 'motor', 'mirror', 'action', 'actions', 'movement', 'interpersonal', 'movements', 'synchrony', 'hand']	['Imitation is a potentially crucial aspect of social cognitive development. Although deficits in imitation ability have been widely demonstrated in autism spectrum disorder (ASD), the specificity and significance of the findings is unclear, due largely to methodological limitations. We developed a novel assessment of imitation ability, using objective movement parameters (path length and action …	imitation - motor - mirror - action - actions - movement - interpersonal - movements - synchrony - hand	1	FALSE
22160300	2013	1	14	Melatonin for sleep in children with autism: a controlled trial examining dose, tolerability, and outcomes.	87	87_melatonin_sleep_circadian_insomnia	['melatonin', 'sleep', 'circadian', 'insomnia', 'asmt', 'rhythms', 'clock', 'rhythm', 'disturbances', 'pedprm']	['Melatonin is one of the most used pharmacologic treatments for sleep problems in autism spectrum disorder, though its relationship with circadian and sleep parameters is still not well stablished. A naturalistic study was conducted in children with autism spectrum disorder, previously drug-naÃ¯ve, before and after treatment with immediate-release melatonin. Circadian rhythms and sleep parameter…	melatonin - sleep - circadian - insomnia - asmt - rhythms - clock - rhythm - disturbances - pedprm	1	FALSE
22160347	2013	2	11	The home TEACCHing program for toddlers with autism.	8	8_intervention_parent_interventions_training	['intervention', 'parent', 'interventions', 'training', 'early', 'parents', 'program', 'eibi', 'esdm', 'child']	['Although data from parent-implemented Naturalistic Developmental Behavioral Interventions have shown positive effects on decreasing core symptoms of autism, there has been limited examination of the effectiveness of Naturalistic Developmental Behavioral Interventions in community settings. In addition, parent perspectives of their involvement in parent-implemented early intervention programs ha…	intervention - parent - interventions - training - early - parents - program - eibi - esdm - child	0.460599	FALSE
22160371	2013	2	11	Just another social scene: evidence for decreased attention to negative social scenes in high-functioning autism.	-1	-1_asd_autism_children_disorder	['asd', 'autism', 'children', 'disorder', 'social', 'spectrum', 'study', 'disorders', 'autistic', 'individuals']	["Whether parental psychiatric disorders are associated with autism spectrum disorder (ASD) in offspring has remained inconclusive. We examined the associations of parental psychiatric disorders with ASD in offspring. This population-based case-control study used Taiwan's National Health Insurance Research Database to identify a cohort of children born from 2004 to 2017 and their parents. A total…	asd - autism - children - disorder - social - spectrum - study - disorders - autistic - individuals	0.0738623	FALSE
22167342	2013	2	11	Daily health symptoms of mothers of adolescents and adults with fragile x syndrome and mothers of adolescents and adults with autism spectrum disorder.	59	59_fxs_fragile_syndrome_boys	['fxs', 'fragile', 'syndrome', 'boys', 'premutation', 'males', 'anxiety', 'fmr1', 'social', 'language']	['Fragile X syndrome (FXS) is the most common known genetic cause of autism spectrum disorder (ASD). Although 50-75\u2009% of children with FXS meet ASD criteria, no studies have compared ASD symptoms in infants with FXS versus other high risk groups, such as siblings of children with ASD (ASIBs). Using the Autism Observation Scale for Infants, our findings indicate that 53\u2009% of 12-month inf…	fxs - fragile - syndrome - boys - premutation - males - anxiety - fmr1 - social - language	0.255496	FALSE
22168894	2013	6	3	The epidemiology of community paediatric outpatient referrals 2006.	63	63_screening_referral_knowledge_pharmacists	['screening', 'referral', 'knowledge', 'pharmacists', 'care', 'diagnostic', 'referrals', 'diagnosis', 'training', 'practices']	['Autism spectrum disorder (ASD) screening completion rates are often low despite their validity and influence on earlier intervention and positive treatment outcomes. This study sought to examine the use of one ASD screening tool, the Modified Checklist for Autism in Toddlers-Revised (MCHAT-R), in a racially and ethnically diverse urban pediatric clinic to review potential disparities within scr…	screening - referral - knowledge - pharmacists - care - diagnostic - referrals - diagnosis - training - practices	0.460703	FALSE
22173749	2013	6	13	Functional and structural MR imaging in neuropsychiatric disorders, part 2: application in schizophrenia and autism.	19	19_volume_cortical_brain_matter	['volume', 'cortical', 'brain', 'matter', 'thickness', 'gray', 'gm', 'structural', 'volumes', 'surface']	['Results on grey matter (GM) structural alterations in autism spectrum disorder (ASD) are inconclusive. Moreover, little is known about age effects on brain-structure abnormalities in ASD beyond childhood. Here, we aimed to examine regional GM volumes in a large sample of children, adolescents, and adults with ASD. Magnetic resonance imaging scans were obtained in 47 male ASD subjects and 51 mat…	volume - cortical - brain - matter - thickness - gray - gm - structural - volumes - surface	1	FALSE
22175527	2014	4	23	Amniotic fluid inflammatory cytokines: potential markers of immunologic dysfunction in autism spectrum disorders.	49	49_il_immune_cytokine_cytokines	['il', 'immune', 'cytokine', 'cytokines', 'inflammatory', 'levels', 'cells', 'interleukin', '1Î²', 'serum']	['B cells play multiple roles in preservation of healthy immune system including management of immune responses by expression of pro- and anti-inflammatory cytokines. Several earlier studies have documented that B cells express both pro-inflammatory cytokines such as IL-6, TNF-Î± as well as anti-inflammatory cytokines such as IL-10. However, it is yet to be examined whether these pro-/anti-inflam…	il - immune - cytokine - cytokines - inflammatory - levels - cells - interleukin - 1Î² - serum	0.0825561	FALSE
22176162	2013	2	14	The neural underpinnings of prosody in autism.	-1	-1_asd_autism_children_disorder	['asd', 'autism', 'children', 'disorder', 'social', 'spectrum', 'study', 'disorders', 'autistic', 'individuals']	["Whether parental psychiatric disorders are associated with autism spectrum disorder (ASD) in offspring has remained inconclusive. We examined the associations of parental psychiatric disorders with ASD in offspring. This population-based case-control study used Taiwan's National Health Insurance Research Database to identify a cohort of children born from 2004 to 2017 and their parents. A total…	asd - autism - children - disorder - social - spectrum - study - disorders - autistic - individuals	0.358292	FALSE
22180003	2013	2	11	Motor skills in children aged 7-10 years, diagnosed with autism spectrum disorder.	32	32_motor_walking_gait_coordination	['motor', 'walking', 'gait', 'coordination', 'dcd', 'gross', 'skills', 'movement', 'toe', 'stereotypies']	['Delays within the motor domain are often overlooked as an early surveillance marker for autism. The present study evaluated motor difficulties and its potential as an early predictive marker for later autism likelihood in a cohort of infants (N\xa0=\xa096) showing early behavioral signs of autism aged 9-14\u2009months. The motor domain was evaluated using the motor subscales of the Mullen Scale…	motor - walking - gait - coordination - dcd - gross - skills - movement - toe - stereotypies	0.141613	FALSE
22183423	2013	2	11	Brief Report: the Social Responsiveness Scale for Adults (SRS-A): initial results in a German cohort.	0	0_diagnostic_screening_dsm_diagnosis	['diagnostic', 'screening', 'dsm', 'diagnosis', 'autism', 'ados', 'chat', 'months', 'developmental', 'specificity']	["The Modified Checklist for Autism in Toddlers (M-CHAT) could be appropriate for universal screening for autism spectrum disorder (ASD) at 18 months and 24 months. Validation studies, however, reported differences in psychometric properties across sample populations. This meta-analysis summarized its accuracy measures and quantified their change in relation to patient and study characteristics.F…	diagnostic - screening - dsm - diagnosis - autism - ados - chat - months - developmental - specificity	0.227921	FALSE
22189962	2013	2	11	Specialized inpatient psychiatry units for children with autism and developmental disorders: a United States survey.	34	34_costs_medicaid_care_cost	['costs', 'medicaid', 'care', 'cost', 'ed', 'services', 'health', 'utilization', 'emergency', 'spending']	['Individuals with intellectual and/or developmental disabilities (IDD) tend to incur high health care costs. The Neurobehavior HOME Program (HOME) is an interdisciplinary program that cares for this population. This study will evaluate the health care costs and utilization of individuals during their first year of enrollment in HOME and identify factors associated with higher cost and utilizatio…	costs - medicaid - care - cost - ed - services - health - utilization - emergency - spending	0.0575657	FALSE
22189963	2013	2	11	The rubber hand illusion reveals proprioceptive and sensorimotor differences in autism spectrum disorders.	-1	-1_asd_autism_children_disorder	['asd', 'autism', 'children', 'disorder', 'social', 'spectrum', 'study', 'disorders', 'autistic', 'individuals']	["Whether parental psychiatric disorders are associated with autism spectrum disorder (ASD) in offspring has remained inconclusive. We examined the associations of parental psychiatric disorders with ASD in offspring. This population-based case-control study used Taiwan's National Health Insurance Research Database to identify a cohort of children born from 2004 to 2017 and their parents. A total…	asd - autism - children - disorder - social - spectrum - study - disorders - autistic - individuals	0.68988	FALSE
22195112	2013	2	25	Evaluation of semantic-based information retrieval methods in the autism phenotype domain.	-1	-1_asd_autism_children_disorder	['asd', 'autism', 'children', 'disorder', 'social', 'spectrum', 'study', 'disorders', 'autistic', 'individuals']	["Whether parental psychiatric disorders are associated with autism spectrum disorder (ASD) in offspring has remained inconclusive. We examined the associations of parental psychiatric disorders with ASD in offspring. This population-based case-control study used Taiwan's National Health Insurance Research Database to identify a cohort of children born from 2004 to 2017 and their parents. A total…	asd - autism - children - disorder - social - spectrum - study - disorders - autistic - individuals	0.822168	FALSE
22200937	2013	2	11	The development of facial gender categorization in individuals with and without autism: the impact of typicality.	100	100_face_faces_recognition_aftereffects	['face', 'faces', 'recognition', 'aftereffects', 'identity', 'processing', 'coding', 'facial', 'individuals', 'inversion']	['There are few direct examinations of whether face-processing difficulties in autism are disproportionate to difficulties with other complex non-face stimuli. Here we examined discrimination ability and memory for faces, cars, and inverted faces in children and adolescents with and without autism. Results showed that, relative to typical children, the difficulties of children and adolescents wit…	face - faces - recognition - aftereffects - identity - processing - coding - facial - individuals - inversion	1	FALSE
22206802	2013	1	11	Toward a better understanding of the savant brain.	-1	-1_asd_autism_children_disorder	['asd', 'autism', 'children', 'disorder', 'social', 'spectrum', 'study', 'disorders', 'autistic', 'individuals']	["Whether parental psychiatric disorders are associated with autism spectrum disorder (ASD) in offspring has remained inconclusive. We examined the associations of parental psychiatric disorders with ASD in offspring. This population-based case-control study used Taiwan's National Health Insurance Research Database to identify a cohort of children born from 2004 to 2017 and their parents. A total…	asd - autism - children - disorder - social - spectrum - study - disorders - autistic - individuals	0.55491	FALSE
22212893	2013	7	19	Respiratory sinus arrhythmia: a marker for positive social functioning and receptive language skills in children with autism spectrum disorders.	92	92_rsa_hrv_autonomic_heart	['rsa', 'hrv', 'autonomic', 'heart', 'eda', 'parasympathetic', 'sinus', 'physiological', 'arrhythmia', 'respiratory']	['A growing body of research has suggested heart rate variability (HRV) may be reduced in autism spectrum disorder (ASD) in comparison to neurotypical cohorts. While there have been several studies investigating HRV in children diagnosed with ASD, few studies have been conducted in adults. The objective of the current study was to investigate autonomic nervous system activity as assessed by HRV i…	rsa - hrv - autonomic - heart - eda - parasympathetic - sinus - physiological - arrhythmia - respiratory	1	FALSE
22215435	2013	2	11	Autonomic arousal to direct gaze correlates with social impairments among children with ASD.	3	3_gaze_eye_attention_tracking	['gaze', 'eye', 'attention', 'tracking', 'visual', 'social', 'faces', 'stimuli', 'face', 'looking']	["Eye-gaze methods offer numerous advantages for studying cognitive processes in children with autism spectrum disorder (ASD), but data loss may threaten the validity and generalizability of results. Some eye-gaze systems may be more vulnerable to data loss than others, but to our knowledge, this issue has not been empirically investigated. In the current study, we asked whether automatic eye-tra…	gaze - eye - attention - tracking - visual - social - faces - stimuli - face - looking	0.120721	FALSE
22215436	2013	2	11	Exploring the social impact of being a typical peer model for included children with autism spectrum disorder.	-1	-1_asd_autism_children_disorder	['asd', 'autism', 'children', 'disorder', 'social', 'spectrum', 'study', 'disorders', 'autistic', 'individuals']	["Whether parental psychiatric disorders are associated with autism spectrum disorder (ASD) in offspring has remained inconclusive. We examined the associations of parental psychiatric disorders with ASD in offspring. This population-based case-control study used Taiwan's National Health Insurance Research Database to identify a cohort of children born from 2004 to 2017 and their parents. A total…	asd - autism - children - disorder - social - spectrum - study - disorders - autistic - individuals	0.448193	FALSE
22222344	2013	1	29	Awareness and knowledge of autism among pharmacists.	63	63_screening_referral_knowledge_pharmacists	['screening', 'referral', 'knowledge', 'pharmacists', 'care', 'diagnostic', 'referrals', 'diagnosis', 'training', 'practices']	['Autism spectrum disorder (ASD) screening completion rates are often low despite their validity and influence on earlier intervention and positive treatment outcomes. This study sought to examine the use of one ASD screening tool, the Modified Checklist for Autism in Toddlers-Revised (MCHAT-R), in a racially and ethnically diverse urban pediatric clinic to review potential disparities within scr…	screening - referral - knowledge - pharmacists - care - diagnostic - referrals - diagnosis - training - practices	0.490504	FALSE
22222775	2013	3	19	Brief report: peculiar evolution of autistic behaviors in two unrelated children with brachidactyly-mental retardation syndrome.	16	16_deletion_duplication_16p11_22q11	['deletion', 'duplication', '16p11', '22q11', 'deletions', 'syndrome', 'region', 'microdeletion', 'carriers', 'duplications']	['Copy number variants (CNVs) are genetic rearrangements, such as deletions and duplications, which result in a deviation from the normal number of copies of a given gene segment. CNVs are implicated in many neuropsychiatric disorders. Deletions of the human chromosomal region 16p11.2 are one of the most common genetic linkages to autism spectrum disorders (ASD). However, ASD is not the only pres…	deletion - duplication - 16p11 - 22q11 - deletions - syndrome - region - microdeletion - carriers - duplications	0.138255	FALSE
22222776	2013	2	11	Brief report: repetitive behaviors in young children with autism spectrum disorder and developmentally similar peers: a follow up to Watt et al. (2008).	-1	-1_asd_autism_children_disorder	['asd', 'autism', 'children', 'disorder', 'social', 'spectrum', 'study', 'disorders', 'autistic', 'individuals']	["Whether parental psychiatric disorders are associated with autism spectrum disorder (ASD) in offspring has remained inconclusive. We examined the associations of parental psychiatric disorders with ASD in offspring. This population-based case-control study used Taiwan's National Health Insurance Research Database to identify a cohort of children born from 2004 to 2017 and their parents. A total…	asd - autism - children - disorder - social - spectrum - study - disorders - autistic - individuals	0.785537	FALSE
22230883	2014	4	4	Cerebral folate receptor autoantibodies in autism spectrum disorder.	108	108_folic_folate_iron_acid	['folic', 'folate', 'iron', 'acid', 'pregnancy', 'supplementation', 'anemia', 'supplements', 'deficiency', '95']	['Prenatal folic acid supplements reduce the risk of neural tube defects in children, but it has not been determined whether they protect against other neurodevelopmental disorders.To examine the association between maternal use of prenatal folic acid supplements and subsequent risk of autism spectrum disorders (ASDs) (autistic disorder, Asperger syndrome, pervasive developmental disorder-not oth…	folic - folate - iron - acid - pregnancy - supplementation - anemia - supplements - deficiency - 95	0.774837	FALSE
22230961	2013	2	11	Maternal and paternal age are jointly associated with childhood autism in Jamaica.	5	5_birth_risk_born_95	['birth', 'risk', 'born', '95', 'ci', 'preterm', 'maternal', 'perinatal', 'age', 'factors']	['We sought to estimate the prevalence of autism spectrum disorder (ASD) in children born extremely preterm relative to the U.S. population risk of 1.5% [CDC, 2014] using the best-available diagnostic procedures and minimizing confounding with other neurodevelopmental impairments. Eight hundred and eighty nine of 966 (92%) 10-year-old children from the Extremely Low Gestational Age Newborn birth …	birth - risk - born - 95 - ci - preterm - maternal - perinatal - age - factors	1	FALSE
22232386	2013	1	7	Effects of sampling context on spontaneous expressive language in males with fragile X syndrome or Down syndrome.	59	59_fxs_fragile_syndrome_boys	['fxs', 'fragile', 'syndrome', 'boys', 'premutation', 'males', 'anxiety', 'fmr1', 'social', 'language']	['Fragile X syndrome (FXS) is the most common known genetic cause of autism spectrum disorder (ASD). Although 50-75\u2009% of children with FXS meet ASD criteria, no studies have compared ASD symptoms in infants with FXS versus other high risk groups, such as siblings of children with ASD (ASIBs). Using the Autism Observation Scale for Infants, our findings indicate that 53\u2009% of 12-month inf…	fxs - fragile - syndrome - boys - premutation - males - anxiety - fmr1 - social - language	0.134184	FALSE
22263878	2013	2	12	Hemispheric asymmetry and theory of mind: is there an association?	122	122_alexithymia_tas_empathy_interoceptive	['alexithymia', 'tas', 'empathy', 'interoceptive', 'emotional', 'traits', 'emotions', 'interoception', 'autistic', 'difficulties']	["Alexithymia refers to pronounced difficulty in identifying and describing one's own emotions and is associated with an externally oriented focus of thinking. Alexithymia is known to be much more common in adults with autism spectrum disorders (ASD) compared with the typically developing (TD) adult population. However, we know very little about alexithymia in young children with ASD and advancin…	alexithymia - tas - empathy - interoceptive - emotional - traits - emotions - interoception - autistic - difficulties	1	FALSE
22267520	2013	11	5	Autistic traits are associated with diminished neural response to affective touch.	-1	-1_asd_autism_children_disorder	['asd', 'autism', 'children', 'disorder', 'social', 'spectrum', 'study', 'disorders', 'autistic', 'individuals']	["Whether parental psychiatric disorders are associated with autism spectrum disorder (ASD) in offspring has remained inconclusive. We examined the associations of parental psychiatric disorders with ASD in offspring. This population-based case-control study used Taiwan's National Health Insurance Research Database to identify a cohort of children born from 2004 to 2017 and their parents. A total…	asd - autism - children - disorder - social - spectrum - study - disorders - autistic - individuals	0.779376	FALSE
22271195	2013	2	11	The rising prevalence of autism: a prospective longitudinal study in the Faroe Islands.	23	23_prevalence_surveillance_addm_years	['prevalence', 'surveillance', 'addm', 'years', 'incidence', 'aged', 'diagnosis', '000', 'children', 'hispanic']	["Autism spectrum disorder (ASD).2010.The Autism and Developmental Disabilities Monitoring (ADDM) Network is an active surveillance system in the United States that provides estimates of the prevalence of ASD and other characteristics among children aged 8 years whose parents or guardians live in 11 ADDM sites in the United States. ADDM surveillance is conducted in two phases. The first phase con…	prevalence - surveillance - addm - years - incidence - aged - diagnosis - 000 - children - hispanic	0.127265	FALSE
22271196	2013	2	11	Differences in autism symptoms between minority and non-minority toddlers.	-1	-1_asd_autism_children_disorder	['asd', 'autism', 'children', 'disorder', 'social', 'spectrum', 'study', 'disorders', 'autistic', 'individuals']	["Whether parental psychiatric disorders are associated with autism spectrum disorder (ASD) in offspring has remained inconclusive. We examined the associations of parental psychiatric disorders with ASD in offspring. This population-based case-control study used Taiwan's National Health Insurance Research Database to identify a cohort of children born from 2004 to 2017 and their parents. A total…	asd - autism - children - disorder - social - spectrum - study - disorders - autistic - individuals	0.924891	FALSE
22271197	2013	2	11	Goal attainment scaling as an outcome measure in randomized controlled trials of psychosocial interventions in autism.	-1	-1_asd_autism_children_disorder	['asd', 'autism', 'children', 'disorder', 'social', 'spectrum', 'study', 'disorders', 'autistic', 'individuals']	["Whether parental psychiatric disorders are associated with autism spectrum disorder (ASD) in offspring has remained inconclusive. We examined the associations of parental psychiatric disorders with ASD in offspring. This population-based case-control study used Taiwan's National Health Insurance Research Database to identify a cohort of children born from 2004 to 2017 and their parents. A total…	asd - autism - children - disorder - social - spectrum - study - disorders - autistic - individuals	0.446735	FALSE
22271844	2014	9	29	Psychotropic medication use in children and adolescents in an inpatient setting.	70	70_psychotropic_antipsychotic_medication_antipsychotics	['psychotropic', 'antipsychotic', 'medication', 'antipsychotics', 'prescribed', 'medications', 'prescription', 'use', 'polypharmacy', 'drugs']	['The goal of this study was to examine rates of psychotropic medication use and identify associated child and family characteristics among children and adolescents with autism spectrum disorder (ASD) enrolled in an autism registry maintained by the Autism Treatment Network (ATN).The sample, derived from the ATN registry, consists of 2853 children aged 2 to 17 years with diagnoses of ASD supporte…	psychotropic - antipsychotic - medication - antipsychotics - prescribed - medications - prescription - use - polypharmacy - drugs	1	FALSE
22278029	2013	3	19	Attentional processing of faces in ASD: a Dot-Probe study.	-1	-1_asd_autism_children_disorder	['asd', 'autism', 'children', 'disorder', 'social', 'spectrum', 'study', 'disorders', 'autistic', 'individuals']	["Whether parental psychiatric disorders are associated with autism spectrum disorder (ASD) in offspring has remained inconclusive. We examined the associations of parental psychiatric disorders with ASD in offspring. This population-based case-control study used Taiwan's National Health Insurance Research Database to identify a cohort of children born from 2004 to 2017 and their parents. A total…	asd - autism - children - disorder - social - spectrum - study - disorders - autistic - individuals	0.064553	FALSE
22278030	2013	3	19	Precursors to social and communication difficulties in infants at-risk for autism: gaze following and attentional engagement.	3	3_gaze_eye_attention_tracking	['gaze', 'eye', 'attention', 'tracking', 'visual', 'social', 'faces', 'stimuli', 'face', 'looking']	["Eye-gaze methods offer numerous advantages for studying cognitive processes in children with autism spectrum disorder (ASD), but data loss may threaten the validity and generalizability of results. Some eye-gaze systems may be more vulnerable to data loss than others, but to our knowledge, this issue has not been empirically investigated. In the current study, we asked whether automatic eye-tra…	gaze - eye - attention - tracking - visual - social - faces - stimuli - face - looking	0.573422	FALSE
22290121	2013	8	12	Disorder-specific functional abnormalities during sustained attention in youth with Attention Deficit Hyperactivity Disorder (ADHD) and with autism.	-1	-1_asd_autism_children_disorder	['asd', 'autism', 'children', 'disorder', 'social', 'spectrum', 'study', 'disorders', 'autistic', 'individuals']	["Whether parental psychiatric disorders are associated with autism spectrum disorder (ASD) in offspring has remained inconclusive. We examined the associations of parental psychiatric disorders with ASD in offspring. This population-based case-control study used Taiwan's National Health Insurance Research Database to identify a cohort of children born from 2004 to 2017 and their parents. A total…	asd - autism - children - disorder - social - spectrum - study - disorders - autistic - individuals	0.923183	FALSE
22292906	2013	6	25	Urban-rural differences in the nature and prevalence of mental ill-health in adults with intellectual disabilities.	23	23_prevalence_surveillance_addm_years	['prevalence', 'surveillance', 'addm', 'years', 'incidence', 'aged', 'diagnosis', '000', 'children', 'hispanic']	["Autism spectrum disorder (ASD).2010.The Autism and Developmental Disabilities Monitoring (ADDM) Network is an active surveillance system in the United States that provides estimates of the prevalence of ASD and other characteristics among children aged 8 years whose parents or guardians live in 11 ADDM sites in the United States. ADDM surveillance is conducted in two phases. The first phase con…	prevalence - surveillance - addm - years - incidence - aged - diagnosis - 000 - children - hispanic	0.55395	FALSE
22292930	2013	6	25	Investigating low adaptive behaviour and presence of the triad of impairments characteristic of autistic spectrum disorder as indicators of risk for challenging behaviour among adults with intellectual disabilities.	61	61_adaptive_iq_intelligence_functioning	['adaptive', 'iq', 'intelligence', 'functioning', 'scores', 'wisc', 'vineland', 'behavior', 'intellectual', 'skills']	['We aimed to clarify the strengths and weaknesses in adaptive behavior in children with focal epilepsy and show children-associated factors related to adaptive behavior.Sixty-three children with focal epilepsy aged 5-18\u202fyears with intellectual quotient (IQ) ranging from 67 to 135 were enrolled in this study. Adaptive behavior was evaluated using the Vineland Adaptive Behavior Scale, 2nd edi…	adaptive - iq - intelligence - functioning - scores - wisc - vineland - behavior - intellectual - skills	0.194397	FALSE
22294525	2016	2	12	Social Interaction Style of Children and Adolescents with High-Functioning Autism Spectrum Disorder.	47	47_ef_executive_memory_cognitive	['ef', 'executive', 'memory', 'cognitive', 'working', 'function', 'adaptive', 'functioning', 'performance', 'flexibility']	['Performance on a single executive function (EF) task (e.g., a card sorting task) is often taken to represent ability on the underlying subcomponent of EF (e.g., set shifting) without accounting for the non-specific and non-executive skills employed to complete the task. This study used a manualised battery of EF tasks to derive individual task scores and latent EF scores. Seventy-nine adolescen…	ef - executive - memory - cognitive - working - function - adaptive - functioning - performance - flexibility	0.330381	FALSE
22296118	2015	10	13	A toothbrush impalement injury of the floor of mouth in autism child.	27	27_dental_oral_care_caries	['dental', 'oral', 'care', 'caries', 'hygiene', 'health', 'dmft', 'teeth', 'children', 'orthodontic']	['Autism spectrum disorder (ASD) is characterized by impairments in social interaction and communication, restricted patterns of behaviour, and unusual sensory sensitivities. The hypotheses to be tested were that adult patients with ASD have a higher caries prevalence, have more risk factors for caries development, and utilize dental health care to a lesser extent than people recruited from the n…	dental - oral - care - caries - hygiene - health - dmft - teeth - children - orthodontic	0.90011	FALSE
22297201	2013	8	27	Enhancing parental well-being and coping through a family-centred short course for Iranian parents of children with an autism spectrum disorder.	-1	-1_asd_autism_children_disorder	['asd', 'autism', 'children', 'disorder', 'social', 'spectrum', 'study', 'disorders', 'autistic', 'individuals']	["Whether parental psychiatric disorders are associated with autism spectrum disorder (ASD) in offspring has remained inconclusive. We examined the associations of parental psychiatric disorders with ASD in offspring. This population-based case-control study used Taiwan's National Health Insurance Research Database to identify a cohort of children born from 2004 to 2017 and their parents. A total…	asd - autism - children - disorder - social - spectrum - study - disorders - autistic - individuals	0.794553	FALSE
22298107	2016	2	12	Correlates of Attachment Perceptions in Parents of Children with Autism Spectrum Disorders.	-1	-1_asd_autism_children_disorder	['asd', 'autism', 'children', 'disorder', 'social', 'spectrum', 'study', 'disorders', 'autistic', 'individuals']	["Whether parental psychiatric disorders are associated with autism spectrum disorder (ASD) in offspring has remained inconclusive. We examined the associations of parental psychiatric disorders with ASD in offspring. This population-based case-control study used Taiwan's National Health Insurance Research Database to identify a cohort of children born from 2004 to 2017 and their parents. A total…	asd - autism - children - disorder - social - spectrum - study - disorders - autistic - individuals	0.805736	FALSE
22298108	2016	2	12	Do Children with Specific Language Impairment have a Cognitive Profile Reminiscent of Autism? A Review of the Literature.	1	1_language_children_speech_expressive	['language', 'children', 'speech', 'expressive', 'verbal', 'vocabulary', 'pragmatic', 'words', 'word', 'communication']	['Both small-scale and epidemiological longitudinal studies of early language delay indicate that most late talkers attain language scores in the average range by age 5, 6, or 7. However, late talker groups typically obtain significantly lower scores than groups with typical language histories on most language measures into adolescence. These findings support a dimensional account of language del…	language - children - speech - expressive - verbal - vocabulary - pragmatic - words - word - communication	0.293321	FALSE
22302509	2016	2	12	Promoting Task Accuracy and Independence in Students with Autism Across Educational Setting Through the Use of Individual Work Systems.	98	98_video_modeling_students_skills	['video', 'modeling', 'students', 'skills', 'instruction', 'vm', 'participants', 'design', 'heuristics', 'intervention']	['Many individuals with autism spectrum disorders (ASD) show deficits in functional living skills, leading to low independence, limited community involvement, and poor quality of life. With development of mobile devices, utilizing video modeling has become more feasible for educators to promote functional living skills of individuals with ASD.This article aims to review the single-case experiment…	video - modeling - students - skills - instruction - vm - participants - design - heuristics - intervention	1	FALSE
22309718	2013	3	21	Memory for emotionally arousing events over time in Autism Spectrum Disorder.	-1	-1_asd_autism_children_disorder	['asd', 'autism', 'children', 'disorder', 'social', 'spectrum', 'study', 'disorders', 'autistic', 'individuals']	["Whether parental psychiatric disorders are associated with autism spectrum disorder (ASD) in offspring has remained inconclusive. We examined the associations of parental psychiatric disorders with ASD in offspring. This population-based case-control study used Taiwan's National Health Insurance Research Database to identify a cohort of children born from 2004 to 2017 and their parents. A total…	asd - autism - children - disorder - social - spectrum - study - disorders - autistic - individuals	0.619434	FALSE
22310906	2013	2	11	Developmental profiles of infants and toddlers with autism spectrum disorders identified prospectively in a community-based setting.	1	1_language_children_speech_expressive	['language', 'children', 'speech', 'expressive', 'verbal', 'vocabulary', 'pragmatic', 'words', 'word', 'communication']	['Both small-scale and epidemiological longitudinal studies of early language delay indicate that most late talkers attain language scores in the average range by age 5, 6, or 7. However, late talker groups typically obtain significantly lower scores than groups with typical language histories on most language measures into adolescence. These findings support a dimensional account of language del…	language - children - speech - expressive - verbal - vocabulary - pragmatic - words - word - communication	0.650261	FALSE
22314575	2013	3	19	Brief report: impaired differentiation of vegetative/affective and intentional nonverbal vocalizations in a subject with Asperger syndrome (AS).	18	18_auditory_speech_pitch_processing	['auditory', 'speech', 'pitch', 'processing', 'mmn', 'sounds', 'prosody', 'acoustic', 'perception', 'abr']	['Purpose Investigations into the nature of communication disorders in autistic individuals increasingly evaluate neural responses to speech stimuli. This integrative review aimed to consolidate the available data related to speech and language processing across levels of stimulus complexity (from single speech sounds to sentences) and to relate it to the current theories of autism. Method An ele…	auditory - speech - pitch - processing - mmn - sounds - prosody - acoustic - perception - abr	0.0457161	FALSE
22318760	2014	11	16	Motor and tactile-perceptual skill differences between individuals with high-functioning autism and typically developing individuals ages 5-21.	32	32_motor_walking_gait_coordination	['motor', 'walking', 'gait', 'coordination', 'dcd', 'gross', 'skills', 'movement', 'toe', 'stereotypies']	['Delays within the motor domain are often overlooked as an early surveillance marker for autism. The present study evaluated motor difficulties and its potential as an early predictive marker for later autism likelihood in a cohort of infants (N\xa0=\xa096) showing early behavioral signs of autism aged 9-14\u2009months. The motor domain was evaluated using the motor subscales of the Mullen Scale…	motor - walking - gait - coordination - dcd - gross - skills - movement - toe - stereotypies	0.0486951	FALSE
22318966	2013	3	29	Fried-potato diet causes vitamin A deficiency in an autistic child.	-1	-1_asd_autism_children_disorder	['asd', 'autism', 'children', 'disorder', 'social', 'spectrum', 'study', 'disorders', 'autistic', 'individuals']	["Whether parental psychiatric disorders are associated with autism spectrum disorder (ASD) in offspring has remained inconclusive. We examined the associations of parental psychiatric disorders with ASD in offspring. This population-based case-control study used Taiwan's National Health Insurance Research Database to identify a cohort of children born from 2004 to 2017 and their parents. A total…	asd - autism - children - disorder - social - spectrum - study - disorders - autistic - individuals	0.737843	FALSE
22322581	2013	3	19	Patterns of autobiographical memory in adults with autism spectrum disorder.	10	10_memory_visual_processing_perceptual	['memory', 'visual', 'processing', 'perceptual', 'task', 'motion', 'perception', 'local', 'tasks', 'global']	['What does an individual with autism spectrum disorder (ASD) perceive first: the forest or the trees? In spite of 30 years of research and influential theories like the weak central coherence (WCC) theory and the enhanced perceptual functioning (EPF) account, the interplay of local and global visual processing in ASD remains only partly understood. Research findings vary in indicating a local pr…	memory - visual - processing - perceptual - task - motion - perception - local - tasks - global	0.103677	FALSE
22322582	2013	3	19	Brief report: stereotypes in autism revisited.	-1	-1_asd_autism_children_disorder	['asd', 'autism', 'children', 'disorder', 'social', 'spectrum', 'study', 'disorders', 'autistic', 'individuals']	["Whether parental psychiatric disorders are associated with autism spectrum disorder (ASD) in offspring has remained inconclusive. We examined the associations of parental psychiatric disorders with ASD in offspring. This population-based case-control study used Taiwan's National Health Insurance Research Database to identify a cohort of children born from 2004 to 2017 and their parents. A total…	asd - autism - children - disorder - social - spectrum - study - disorders - autistic - individuals	0.614211	FALSE
22324909	2013	11	12	The experiences of parents of children with severe autism in connection with their children's anaesthetics, in the presence and absence of the perioperative dialogue: a hermeneutic study.	97	97_anesthesia_sedation_perioperative_dexmedetomidine	['anesthesia', 'sedation', 'perioperative', 'dexmedetomidine', 'patients', 'midazolam', 'induction', 'general', 'ketamine', 'preoperative']	['Autism Spectrum Disorder (ASD) is characterized by impaired social interaction and communication, and by restricted and repetitive behavior, that begins usually before a child is three years old.(1) Researchers have shown that prevalence rates in the U.S. may be as high as 1 in 68.(52) A number of studies have examined the effects of early exposure to anesthesia on brain development and subsequ…	anesthesia - sedation - perioperative - dexmedetomidine - patients - midazolam - induction - general - ketamine - preoperative	1	FALSE
22327267	2013	2	25	Functional communication training and chained schedules of reinforcement to treat challenging behavior maintained by terminations of activity interruptions.	20	20_reinforcement_problem_stereotypy_reinforcer	['reinforcement', 'problem', 'stereotypy', 'reinforcer', 'behavior', 'preference', 'fct', 'rird', 'extinction', 'responding']	["This study examined behavioral persistence during extinction following continuous or intermittent reinforcement in the context of an analogue functional analysis of problem behavior. Participants were 4 children who had been diagnosed with an autism spectrum disorder and who engaged in problem behavior maintained by social reinforcement. Experimental sessions included 4 successive 5-min compone…	reinforcement - problem - stereotypy - reinforcer - behavior - preference - fct - rird - extinction - responding	0.675702	FALSE
22333911	2013	10	25	Gray matter textural heterogeneity as a potential in-vivo biomarker of fine structural abnormalities in Asperger syndrome.	19	19_volume_cortical_brain_matter	['volume', 'cortical', 'brain', 'matter', 'thickness', 'gray', 'gm', 'structural', 'volumes', 'surface']	['Results on grey matter (GM) structural alterations in autism spectrum disorder (ASD) are inconclusive. Moreover, little is known about age effects on brain-structure abnormalities in ASD beyond childhood. Here, we aimed to examine regional GM volumes in a large sample of children, adolescents, and adults with ASD. Magnetic resonance imaging scans were obtained in 47 male ASD subjects and 51 mat…	volume - cortical - brain - matter - thickness - gray - gm - structural - volumes - surface	0.838427	FALSE
22350336	2013	3	19	The Study to Explore Early Development (SEED): a multisite epidemiologic study of autism by the Centers for Autism and Developmental Disabilities Research and Epidemiology (CADDRE) network.	5	5_birth_risk_born_95	['birth', 'risk', 'born', '95', 'ci', 'preterm', 'maternal', 'perinatal', 'age', 'factors']	['We sought to estimate the prevalence of autism spectrum disorder (ASD) in children born extremely preterm relative to the U.S. population risk of 1.5% [CDC, 2014] using the best-available diagnostic procedures and minimizing confounding with other neurodevelopmental impairments. Eight hundred and eighty nine of 966 (92%) 10-year-old children from the Extremely Low Gestational Age Newborn birth …	birth - risk - born - 95 - ci - preterm - maternal - perinatal - age - factors	0.130203	FALSE
22350338	2013	3	19	Brief report: examining the link between autistic traits and compulsive Internet use in a non-clinical sample.	-1	-1_asd_autism_children_disorder	['asd', 'autism', 'children', 'disorder', 'social', 'spectrum', 'study', 'disorders', 'autistic', 'individuals']	["Whether parental psychiatric disorders are associated with autism spectrum disorder (ASD) in offspring has remained inconclusive. We examined the associations of parental psychiatric disorders with ASD in offspring. This population-based case-control study used Taiwan's National Health Insurance Research Database to identify a cohort of children born from 2004 to 2017 and their parents. A total…	asd - autism - children - disorder - social - spectrum - study - disorders - autistic - individuals	0.932595	FALSE
22350340	2013	3	19	Play and joint attention of children with autism in the preschool special education classroom.	-1	-1_asd_autism_children_disorder	['asd', 'autism', 'children', 'disorder', 'social', 'spectrum', 'study', 'disorders', 'autistic', 'individuals']	["Whether parental psychiatric disorders are associated with autism spectrum disorder (ASD) in offspring has remained inconclusive. We examined the associations of parental psychiatric disorders with ASD in offspring. This population-based case-control study used Taiwan's National Health Insurance Research Database to identify a cohort of children born from 2004 to 2017 and their parents. A total…	asd - autism - children - disorder - social - spectrum - study - disorders - autistic - individuals	0.200221	FALSE
22350341	2013	4	18	A two-year longitudinal MRI study of the corpus callosum in autism.	-1	-1_asd_autism_children_disorder	['asd', 'autism', 'children', 'disorder', 'social', 'spectrum', 'study', 'disorders', 'autistic', 'individuals']	["Whether parental psychiatric disorders are associated with autism spectrum disorder (ASD) in offspring has remained inconclusive. We examined the associations of parental psychiatric disorders with ASD in offspring. This population-based case-control study used Taiwan's National Health Insurance Research Database to identify a cohort of children born from 2004 to 2017 and their parents. A total…	asd - autism - children - disorder - social - spectrum - study - disorders - autistic - individuals	0.548827	FALSE
22350451	2013	3	19	An examination of handedness and footedness in children with high functioning autism and Asperger syndrome.	-1	-1_asd_autism_children_disorder	['asd', 'autism', 'children', 'disorder', 'social', 'spectrum', 'study', 'disorders', 'autistic', 'individuals']	["Whether parental psychiatric disorders are associated with autism spectrum disorder (ASD) in offspring has remained inconclusive. We examined the associations of parental psychiatric disorders with ASD in offspring. This population-based case-control study used Taiwan's National Health Insurance Research Database to identify a cohort of children born from 2004 to 2017 and their parents. A total…	asd - autism - children - disorder - social - spectrum - study - disorders - autistic - individuals	0.650227	FALSE
22350453	2013	3	19	Language in low-functioning children with autistic disorder: differences between receptive and expressive skills and concurrent predictors of language.	1	1_language_children_speech_expressive	['language', 'children', 'speech', 'expressive', 'verbal', 'vocabulary', 'pragmatic', 'words', 'word', 'communication']	['Both small-scale and epidemiological longitudinal studies of early language delay indicate that most late talkers attain language scores in the average range by age 5, 6, or 7. However, late talker groups typically obtain significantly lower scores than groups with typical language histories on most language measures into adolescence. These findings support a dimensional account of language del…	language - children - speech - expressive - verbal - vocabulary - pragmatic - words - word - communication	0.246527	FALSE
22354708	2013	3	19	Gaze performance in children with autism spectrum disorder when observing communicative actions.	-1	-1_asd_autism_children_disorder	['asd', 'autism', 'children', 'disorder', 'social', 'spectrum', 'study', 'disorders', 'autistic', 'individuals']	["Whether parental psychiatric disorders are associated with autism spectrum disorder (ASD) in offspring has remained inconclusive. We examined the associations of parental psychiatric disorders with ASD in offspring. This population-based case-control study used Taiwan's National Health Insurance Research Database to identify a cohort of children born from 2004 to 2017 and their parents. A total…	asd - autism - children - disorder - social - spectrum - study - disorders - autistic - individuals	0.0622351	FALSE
22354709	2013	4	18	A comparative study: completion of fine motor office related tasks by high school students with autism using video models on large and small screen sizes.	98	98_video_modeling_students_skills	['video', 'modeling', 'students', 'skills', 'instruction', 'vm', 'participants', 'design', 'heuristics', 'intervention']	['Many individuals with autism spectrum disorders (ASD) show deficits in functional living skills, leading to low independence, limited community involvement, and poor quality of life. With development of mobile devices, utilizing video modeling has become more feasible for educators to promote functional living skills of individuals with ASD.This article aims to review the single-case experiment…	video - modeling - students - skills - instruction - vm - participants - design - heuristics - intervention	1	FALSE
22359179	2013	3	19	Brief report: driving and young adults with ASD: parents' experiences.	37	37_driving_postural_dog_drivers	['driving', 'postural', 'dog', 'drivers', 'assisted', 'dogs', 'balance', 'animal', 'control', 'therapy']	["Previous studies have shown that individuals with autism spectrum disorder (ASD) demonstrate poorer driving performance than their peers and are less likely to obtain a driver's license. This study aims to examine the relationship between driving performance and executive functioning for novice drivers, with and without ASD, using a driving simulator. Forty-four males (ages 15-23), 17 with ASD …	driving - postural - dog - drivers - assisted - dogs - balance - animal - control - therapy	0.000497689	FALSE
22359385	2014	1	27	Callosal fiber length and interhemispheric connectivity in adults with autism: brain overgrowth and underconnectivity.	48	48_matter_white_diffusion_tracts	['matter', 'white', 'diffusion', 'tracts', 'diffusivity', 'fa', 'anisotropy', 'tract', 'fractional', 'dti']	['Abnormal functional connections are associated with impaired white matter tract integrity in the brain. Diffusion tensor imaging (DTI) is a promising method for evaluating white matter integrity in infants and young children. This work aims to shed light on the location and nature of the decrease in white matter integrity.Here, the results of 19 studies have been presented that investigated whi…	matter - white - diffusion - tracts - diffusivity - fa - anisotropy - tract - fractional - dti	0.0888772	FALSE
22361104	2013	3	25	A comparison of developmental social-pragmatic and naturalistic behavioral interventions on language use and social engagement in children with autism.	-1	-1_asd_autism_children_disorder	['asd', 'autism', 'children', 'disorder', 'social', 'spectrum', 'study', 'disorders', 'autistic', 'individuals']	["Whether parental psychiatric disorders are associated with autism spectrum disorder (ASD) in offspring has remained inconclusive. We examined the associations of parental psychiatric disorders with ASD in offspring. This population-based case-control study used Taiwan's National Health Insurance Research Database to identify a cohort of children born from 2004 to 2017 and their parents. A total…	asd - autism - children - disorder - social - spectrum - study - disorders - autistic - individuals	0.785664	FALSE
22361923	2013	4	18	Comparison of children with autism spectrum disorder with and without schizophrenia spectrum traits: gender, season of birth, and mental health risk factors.	62	62_schizophrenia_psychosis_schizotypal_psychotic	['schizophrenia', 'psychosis', 'schizotypal', 'psychotic', 'traits', 'schizotypy', 'symptoms', 'disorders', 'sads', 'autistic']	['Autism spectrum and schizophrenia spectrum disorders are classified separately in the DSM-5, yet research indicates that these two disorders share overlapping features. The aim of the present study was to examine the overlap between autistic and schizotypal personality traits and whether anxiety and depression act as confounding variables in this relationship within a non-clinical population. O…	schizophrenia - psychosis - schizotypal - psychotic - traits - schizotypy - symptoms - disorders - sads - autistic	1	FALSE
22361924	2013	4	18	Self-reported autism symptoms in adults with autism spectrum disorders.	0	0_diagnostic_screening_dsm_diagnosis	['diagnostic', 'screening', 'dsm', 'diagnosis', 'autism', 'ados', 'chat', 'months', 'developmental', 'specificity']	["The Modified Checklist for Autism in Toddlers (M-CHAT) could be appropriate for universal screening for autism spectrum disorder (ASD) at 18 months and 24 months. Validation studies, however, reported differences in psychometric properties across sample populations. This meta-analysis summarized its accuracy measures and quantified their change in relation to patient and study characteristics.F…	diagnostic - screening - dsm - diagnosis - autism - ados - chat - months - developmental - specificity	0.234538	FALSE
22366648	2014	4	15	Social memory, amnesia, and autism: brain oxytocin secretion is regulated by NAD+ metabolites and single nucleotide polymorphisms of CD38.	14	14_oxytocin_ot_oxt_oxtr	['oxytocin', 'ot', 'oxt', 'oxtr', 'intranasal', 'administration', 'social', 'avp', 'placebo', 'neuropeptide']	['Autism spectrum disorder is a behavioral disorder characterized by impairments in social interaction and communication together with the presence of stereotyped behaviors and restricted interests. Although highly genetic, its etiology is complex which correlates with the extensive heterogeneity found in its clinical manifestation, adding to the challenge of understanding its pathophysiology and…	oxytocin - ot - oxt - oxtr - intranasal - administration - social - avp - placebo - neuropeptide	0.12137	FALSE
22366913	2013	4	18	Temperament and sensory features of children with autism.	-1	-1_asd_autism_children_disorder	['asd', 'autism', 'children', 'disorder', 'social', 'spectrum', 'study', 'disorders', 'autistic', 'individuals']	["Whether parental psychiatric disorders are associated with autism spectrum disorder (ASD) in offspring has remained inconclusive. We examined the associations of parental psychiatric disorders with ASD in offspring. This population-based case-control study used Taiwan's National Health Insurance Research Database to identify a cohort of children born from 2004 to 2017 and their parents. A total…	asd - autism - children - disorder - social - spectrum - study - disorders - autistic - individuals	0.910472	FALSE
22369279	2013	8	5	Clinical application of 2.7M Cytogenetics array for CNV detection in subjects with idiopathic autism and/or intellectual disability.	69	69_cnvs_cnv_copy_genomic	['cnvs', 'cnv', 'copy', 'genomic', 'pathogenic', 'array', 'number', 'chromosomal', 'variants', 'microarray']	['Chromosomal microarray analysis (CMA) is currently considered a first-tier diagnostic assay for the investigation of autism spectrum disorders (ASD), developmental delay and intellectual disability of unknown etiology. High-resolution arrays were utilized for the identification of copy number variations (CNVs) in 195 ASD patients of Greek origin (126 males, 69 females). CMA resulted in the dete…	cnvs - cnv - copy - genomic - pathogenic - array - number - chromosomal - variants - microarray	1	FALSE
22369675	2016	11	14	Determinants of adult functional outcome in adolescents receiving special educational assistance.	0	0_diagnostic_screening_dsm_diagnosis	['diagnostic', 'screening', 'dsm', 'diagnosis', 'autism', 'ados', 'chat', 'months', 'developmental', 'specificity']	["The Modified Checklist for Autism in Toddlers (M-CHAT) could be appropriate for universal screening for autism spectrum disorder (ASD) at 18 months and 24 months. Validation studies, however, reported differences in psychometric properties across sample populations. This meta-analysis summarized its accuracy measures and quantified their change in relation to patient and study characteristics.F…	diagnostic - screening - dsm - diagnosis - autism - ados - chat - months - developmental - specificity	0.33618	FALSE
22374775	2013	5	28	[Measurements of stress and family impact in the parents of children with autism spectrum disorders before and after taking part in a training programme].	4	4_parenting_stress_mothers_parents	['parenting', 'stress', 'mothers', 'parents', 'coping', 'child', 'fathers', 'family', 'parental', 'support']	['The aim of the study was to investigate the perception of the family functioning in parents of children with autism spectrum disorders (ASD) with normal-range intelligence and the relationships between family functioning, parenting stress and quality of life. Dyads of parents of children with ASD without intellectual disability and parents of typically developing children (controls) completed a…	parenting - stress - mothers - parents - coping - child - fathers - family - parental - support	0.229283	FALSE
22378669	2013	6	5	Association between peroxisomal biogenesis factor 7 and autism spectrum disorders in a Korean population.	57	57_snps_association_genetic_polymorphisms	['snps', 'association', 'genetic', 'polymorphisms', 'genome', 'allele', 'gene', 'haplotype', 'wide', 'genes']	["Autism spectrum disorder (ASD) is neurodevelopmental disorder characterized by stereotyped behavior and deficits in communication and social interactions. To date, numerous studies have investigated the associations between genetic variants and ASD risk. However, the results of these published studies lack a clear consensus. In the present study, we performed a systematic review on the associat…	snps - association - genetic - polymorphisms - genome - allele - gene - haplotype - wide - genes	0.575318	FALSE
22382606	2013	4	18	Brief report: a comparison of statistical learning in school-aged children with high functioning autism and typically developing peers.	-1	-1_asd_autism_children_disorder	['asd', 'autism', 'children', 'disorder', 'social', 'spectrum', 'study', 'disorders', 'autistic', 'individuals']	["Whether parental psychiatric disorders are associated with autism spectrum disorder (ASD) in offspring has remained inconclusive. We examined the associations of parental psychiatric disorders with ASD in offspring. This population-based case-control study used Taiwan's National Health Insurance Research Database to identify a cohort of children born from 2004 to 2017 and their parents. A total…	asd - autism - children - disorder - social - spectrum - study - disorders - autistic - individuals	0.589429	FALSE
22382729	2015	1	20	Behavioural genetics of childhood disorders.	31	31_genetic_psychiatric_schizophrenia_polygenic	['genetic', 'psychiatric', 'schizophrenia', 'polygenic', 'adhd', 'genome', 'disorders', 'wide', 'bipolar', 'major']	['Epidemiological studies demonstrate an association between classes of obesity and psychiatric disorders, although little is known about shared genetics and causality of association. Thus, we aimed to investigate shared genetics and causal link between different classes of obesity and psychiatric disorders.We used genome-wide association study (GWAS) summary data range from 9725 to 500,199 sampl…	genetic - psychiatric - schizophrenia - polygenic - adhd - genome - disorders - wide - bipolar - major	1	FALSE
22389942	2013	12	26	How sensory experiences of children with and without autism affect family occupations.	-1	-1_asd_autism_children_disorder	['asd', 'autism', 'children', 'disorder', 'social', 'spectrum', 'study', 'disorders', 'autistic', 'individuals']	["Whether parental psychiatric disorders are associated with autism spectrum disorder (ASD) in offspring has remained inconclusive. We examined the associations of parental psychiatric disorders with ASD in offspring. This population-based case-control study used Taiwan's National Health Insurance Research Database to identify a cohort of children born from 2004 to 2017 and their parents. A total…	asd - autism - children - disorder - social - spectrum - study - disorders - autistic - individuals	0.0900841	FALSE
22390668	2013	8	9	Difference or disorder? Cultural issues in understanding neurodevelopmental disorders.	-1	-1_asd_autism_children_disorder	['asd', 'autism', 'children', 'disorder', 'social', 'spectrum', 'study', 'disorders', 'autistic', 'individuals']	["Whether parental psychiatric disorders are associated with autism spectrum disorder (ASD) in offspring has remained inconclusive. We examined the associations of parental psychiatric disorders with ASD in offspring. This population-based case-control study used Taiwan's National Health Insurance Research Database to identify a cohort of children born from 2004 to 2017 and their parents. A total…	asd - autism - children - disorder - social - spectrum - study - disorders - autistic - individuals	0.776579	FALSE
22391809	2013	4	18	Reasoning on the basis of fantasy content: two studies with high-functioning autistic adolescents.	-1	-1_asd_autism_children_disorder	['asd', 'autism', 'children', 'disorder', 'social', 'spectrum', 'study', 'disorders', 'autistic', 'individuals']	["Whether parental psychiatric disorders are associated with autism spectrum disorder (ASD) in offspring has remained inconclusive. We examined the associations of parental psychiatric disorders with ASD in offspring. This population-based case-control study used Taiwan's National Health Insurance Research Database to identify a cohort of children born from 2004 to 2017 and their parents. A total…	asd - autism - children - disorder - social - spectrum - study - disorders - autistic - individuals	0.0825312	FALSE
22391810	2013	4	18	Flexible visual processing in young adults with autism: the effects of implicit learning on a global-local task.	10	10_memory_visual_processing_perceptual	['memory', 'visual', 'processing', 'perceptual', 'task', 'motion', 'perception', 'local', 'tasks', 'global']	['What does an individual with autism spectrum disorder (ASD) perceive first: the forest or the trees? In spite of 30 years of research and influential theories like the weak central coherence (WCC) theory and the enhanced perceptual functioning (EPF) account, the interplay of local and global visual processing in ASD remains only partly understood. Research findings vary in indicating a local pr…	memory - visual - processing - perceptual - task - motion - perception - local - tasks - global	1	FALSE
22392415	2013	2	1	A double-blind placebo controlled trial of Ginkgo biloba added to risperidone in patients with autistic disorders.	21	21_risperidone_aripiprazole_irritability_placebo	['risperidone', 'aripiprazole', 'irritability', 'placebo', 'treatment', 'mg', 'drug', 'abc', 'effects', 'dose']	['The objective of this trial, Biomarkers in Autism of Aripiprazole and Risperidone Treatment (BAART), was to provide support and guidance for an evidence-based approach for the selection and monitoring of initial pharmacotherapy in patients with autism by assessing predictors of efficacy, tolerability, and safety. This randomized double-blind parallel-group study was conducted in three academic …	risperidone - aripiprazole - irritability - placebo - treatment - mg - drug - abc - effects - dose	0.172322	FALSE
22394527	2013	7	1	Sense and self-regulation checklist, a measure of comorbid autism symptoms: initial psychometric evidence.	33	33_sensory_tactile_touch_processing	['sensory', 'tactile', 'touch', 'processing', 'reactivity', 'features', 'seeking', 'sensitivity', 'profile', 'ssp']	['This study examines whether sensory differences can be used to classify meaningful subgroups of children with autism spectrum disorder (ASD). Caregivers of children with ASD aged 2-10 years (n\u2009=\u2009228) completed the Short Sensory Profile. Model-based cluster analysis was used to extract sensory subtypes. The relationship of these subtypes to age, gender, autism symptom severity, and non…	sensory - tactile - touch - processing - reactivity - features - seeking - sensitivity - profile - ssp	0.582946	FALSE
22395820	2013	4	18	Convergent and discriminant validity and reliability of the pediatric anxiety rating scale in youth with autism spectrum disorders.	30	30_anxiety_symptoms_social_parent	['anxiety', 'symptoms', 'social', 'parent', 'youth', 'sad', 'children', 'asd', 'uncertainty', 'iu']	['Children with Autism Spectrum Disorder are vulnerable to anxiety. Repetitive behaviours are a core feature of Autism Spectrum Disorder (ASD) and have been associated anxiety. This study examined repetitive behaviours and anxiety in two groups of children with autism spectrum disorder, those with high anxiety and those with lower levels of anxiety. Children with high anxiety had more repetitive …	anxiety - symptoms - social - parent - youth - sad - children - asd - uncertainty - iu	1	FALSE
22397633	2014	4	23	Neurotransmitter systems and neurotrophic factors in autism: association study of 37 genes suggests involvement of DDC.	-1	-1_asd_autism_children_disorder	['asd', 'autism', 'children', 'disorder', 'social', 'spectrum', 'study', 'disorders', 'autistic', 'individuals']	["Whether parental psychiatric disorders are associated with autism spectrum disorder (ASD) in offspring has remained inconclusive. We examined the associations of parental psychiatric disorders with ASD in offspring. This population-based case-control study used Taiwan's National Health Insurance Research Database to identify a cohort of children born from 2004 to 2017 and their parents. A total…	asd - autism - children - disorder - social - spectrum - study - disorders - autistic - individuals	0.621518	FALSE
22399411	2013	4	18	Parental occupational exposures and autism spectrum disorder.	-1	-1_asd_autism_children_disorder	['asd', 'autism', 'children', 'disorder', 'social', 'spectrum', 'study', 'disorders', 'autistic', 'individuals']	["Whether parental psychiatric disorders are associated with autism spectrum disorder (ASD) in offspring has remained inconclusive. We examined the associations of parental psychiatric disorders with ASD in offspring. This population-based case-control study used Taiwan's National Health Insurance Research Database to identify a cohort of children born from 2004 to 2017 and their parents. A total…	asd - autism - children - disorder - social - spectrum - study - disorders - autistic - individuals	0.659251	FALSE
22399448	2013	3	1	Compliance with requests by children with autism: the impact of sentence type.	1	1_language_children_speech_expressive	['language', 'children', 'speech', 'expressive', 'verbal', 'vocabulary', 'pragmatic', 'words', 'word', 'communication']	['Both small-scale and epidemiological longitudinal studies of early language delay indicate that most late talkers attain language scores in the average range by age 5, 6, or 7. However, late talker groups typically obtain significantly lower scores than groups with typical language histories on most language measures into adolescence. These findings support a dimensional account of language del…	language - children - speech - expressive - verbal - vocabulary - pragmatic - words - word - communication	0.168463	FALSE
22399449	2013	8	27	A nationwide survey on quality of life and associated factors of adults with high-functioning autism spectrum disorders.	110	110_qol_quality_life_vida	['qol', 'quality', 'life', 'vida', 'calidad', 'pedsql', 'fqol', 'functioning', 'health', 'disability']	["\u2003 Compared with other conditions there has been a lack of focus on quality of life (QoL) as an outcome measure for children and young people with Autism Spectrum Disorder (ASD). This pilot study aimed to evaluate the validity of existing QoL questionnaires for use with children with ASD aged 8-12 years.\u2003 A literature review (1990-2011) identified the PedsQL (Pediatric Quality of Life …	qol - quality - life - vida - calidad - pedsql - fqol - functioning - health - disability	0.482827	FALSE
22407279	2013	2	1	The role of co-occurring disruptive behavior in the clinical presentation of children and adolescents with anxiety in the context of autism spectrum disorders.	-1	-1_asd_autism_children_disorder	['asd', 'autism', 'children', 'disorder', 'social', 'spectrum', 'study', 'disorders', 'autistic', 'individuals']	["Whether parental psychiatric disorders are associated with autism spectrum disorder (ASD) in offspring has remained inconclusive. We examined the associations of parental psychiatric disorders with ASD in offspring. This population-based case-control study used Taiwan's National Health Insurance Research Database to identify a cohort of children born from 2004 to 2017 and their parents. A total…	asd - autism - children - disorder - social - spectrum - study - disorders - autistic - individuals	0.521217	FALSE
22407579	2013	4	18	Assessing autistic traits in a Taiwan preschool population: cross-cultural validation of the Social Responsiveness Scale (SRS).	0	0_diagnostic_screening_dsm_diagnosis	['diagnostic', 'screening', 'dsm', 'diagnosis', 'autism', 'ados', 'chat', 'months', 'developmental', 'specificity']	["The Modified Checklist for Autism in Toddlers (M-CHAT) could be appropriate for universal screening for autism spectrum disorder (ASD) at 18 months and 24 months. Validation studies, however, reported differences in psychometric properties across sample populations. This meta-analysis summarized its accuracy measures and quantified their change in relation to patient and study characteristics.F…	diagnostic - screening - dsm - diagnosis - autism - ados - chat - months - developmental - specificity	0.103459	FALSE
22407580	2015	8	10	Eyewitness testimony in autism spectrum disorder: a review.	-1	-1_asd_autism_children_disorder	['asd', 'autism', 'children', 'disorder', 'social', 'spectrum', 'study', 'disorders', 'autistic', 'individuals']	["Whether parental psychiatric disorders are associated with autism spectrum disorder (ASD) in offspring has remained inconclusive. We examined the associations of parental psychiatric disorders with ASD in offspring. This population-based case-control study used Taiwan's National Health Insurance Research Database to identify a cohort of children born from 2004 to 2017 and their parents. A total…	asd - autism - children - disorder - social - spectrum - study - disorders - autistic - individuals	0.200835	FALSE
22415587	2013	5	17	Underutilization of genetics services for autism: the importance of parental awareness and provider recommendation.	104	104_testing_genetic_genetics_parents	['testing', 'genetic', 'genetics', 'parents', 'families', 'research', 'knowledge', 'pgt', 'services', 'ethical']	['This study examined the experiences of Autism Spectrum Disorder (ASD) genetic testing among parents of children with ASD. A nationwide sample of 552 parents of children with ASD completed an online survey. Nearly one-quarter (22.5%) of the parents reported that their affected children had undergone ASD genetic testing. The testing utilization was associated with awareness of ASD genetic testing…	testing - genetic - genetics - parents - families - research - knowledge - pgt - services - ethical	0.472286	FALSE
22419380	2013	4	18	Brief report: assessment of the social-emotional profile in children with autism spectrum disorders using a novel comic strip task.	85	85_tom_mind_theory_ef	['tom', 'mind', 'theory', 'ef', 'verbal', 'social', 'comprehension', 'children', 'cognitive', 'ability']	["'Theory of Mind' (ToM) is the ability to attribute mental states to others to make sense of their behaviour. ToM research has informed understanding of (a)typical social behaviour, including the symptoms of autism spectrum disorder (ASD). This began with research on ToM in autistic children and there has been a noticeable increase in the study of ToM in autistic adults. However, methodological …	tom - mind - theory - ef - verbal - social - comprehension - children - cognitive - ability	1	FALSE
22421071	2013	3	17	Is autism spectrum disorder common in schizophrenia?	62	62_schizophrenia_psychosis_schizotypal_psychotic	['schizophrenia', 'psychosis', 'schizotypal', 'psychotic', 'traits', 'schizotypy', 'symptoms', 'disorders', 'sads', 'autistic']	['Autism spectrum and schizophrenia spectrum disorders are classified separately in the DSM-5, yet research indicates that these two disorders share overlapping features. The aim of the present study was to examine the overlap between autistic and schizotypal personality traits and whether anxiety and depression act as confounding variables in this relationship within a non-clinical population. O…	schizophrenia - psychosis - schizotypal - psychotic - traits - schizotypy - symptoms - disorders - sads - autistic	1	FALSE
22422339	2013	4	18	The effect of gestational age on symptom severity in children with autism spectrum disorder.	0	0_diagnostic_screening_dsm_diagnosis	['diagnostic', 'screening', 'dsm', 'diagnosis', 'autism', 'ados', 'chat', 'months', 'developmental', 'specificity']	["The Modified Checklist for Autism in Toddlers (M-CHAT) could be appropriate for universal screening for autism spectrum disorder (ASD) at 18 months and 24 months. Validation studies, however, reported differences in psychometric properties across sample populations. This meta-analysis summarized its accuracy measures and quantified their change in relation to patient and study characteristics.F…	diagnostic - screening - dsm - diagnosis - autism - ados - chat - months - developmental - specificity	0.121369	FALSE
22425467	2013	4	30	Emotional face processing in neurotypicals with autistic traits: implications for the broad autism phenotype.	29	29_emotion_facial_expressions_recognition	['emotion', 'facial', 'expressions', 'recognition', 'emotions', 'emotional', 'face', 'faces', 'happy', 'angry']	["Facial mimicry as well as the accurate assessment of one's performance when judging others' emotional expressions have been suggested to inform successful emotion recognition. Differences in the integration of these two information sources might explain alterations in the perception of others' emotions in individuals with Social Anxiety Disorder and individuals on the autism spectrum. Using a n…	emotion - facial - expressions - recognition - emotions - emotional - face - faces - happy - angry	0.0930898	FALSE
22426803	2013	5	24	1H-MRS in autism spectrum disorders: a systematic meta-analysis.	67	67_gaba_glutamate_cr_mrs	['gaba', 'glutamate', 'cr', 'mrs', 'glx', 'spectroscopy', 'naa', 'levels', 'cortex', 'acc']	['Imbalanced levels of excitation and inhibition (E/I) have been proposed to account for various behavioral and electrophysiological phenotypes in autism. Although proton magnetic resonance spectroscopy ((1)H-MRS) studies have been published on various metabolite levels in autism, including glutamate, the major excitatory neurotransmitter, few (1)H-MRS studies have yet been conducted the major in…	gaba - glutamate - cr - mrs - glx - spectroscopy - naa - levels - cortex - acc	0.453899	FALSE
22426848	2013	2	11	Altered neurotrophin, neuropeptide, cytokines and nitric oxide levels in autism.	49	49_il_immune_cytokine_cytokines	['il', 'immune', 'cytokine', 'cytokines', 'inflammatory', 'levels', 'cells', 'interleukin', '1Î²', 'serum']	['B cells play multiple roles in preservation of healthy immune system including management of immune responses by expression of pro- and anti-inflammatory cytokines. Several earlier studies have documented that B cells express both pro-inflammatory cytokines such as IL-6, TNF-Î± as well as anti-inflammatory cytokines such as IL-10. However, it is yet to be examined whether these pro-/anti-inflam…	il - immune - cytokine - cytokines - inflammatory - levels - cells - interleukin - 1Î² - serum	0.559404	FALSE
22427260	2013	4	18	Brief report: the medical care of adults with autism spectrum disorders: identifying the needs.	-1	-1_asd_autism_children_disorder	['asd', 'autism', 'children', 'disorder', 'social', 'spectrum', 'study', 'disorders', 'autistic', 'individuals']	["Whether parental psychiatric disorders are associated with autism spectrum disorder (ASD) in offspring has remained inconclusive. We examined the associations of parental psychiatric disorders with ASD in offspring. This population-based case-control study used Taiwan's National Health Insurance Research Database to identify a cohort of children born from 2004 to 2017 and their parents. A total…	asd - autism - children - disorder - social - spectrum - study - disorders - autistic - individuals	0.0428023	FALSE
22430361	2013	4	18	Brief report: concurrent validity of the Leiter-R and KBIT-2 scales of nonverbal intelligence for children with autism and language impairments.	61	61_adaptive_iq_intelligence_functioning	['adaptive', 'iq', 'intelligence', 'functioning', 'scores', 'wisc', 'vineland', 'behavior', 'intellectual', 'skills']	['We aimed to clarify the strengths and weaknesses in adaptive behavior in children with focal epilepsy and show children-associated factors related to adaptive behavior.Sixty-three children with focal epilepsy aged 5-18\u202fyears with intellectual quotient (IQ) ranging from 67 to 135 were enrolled in this study. Adaptive behavior was evaluated using the Vineland Adaptive Behavior Scale, 2nd edi…	adaptive - iq - intelligence - functioning - scores - wisc - vineland - behavior - intellectual - skills	0.281684	FALSE
22434280	2013	4	18	Support for a link between the local processing bias and social deficits in autism: an investigation of embedded figures test performance in non-clinical individuals.	-1	-1_asd_autism_children_disorder	['asd', 'autism', 'children', 'disorder', 'social', 'spectrum', 'study', 'disorders', 'autistic', 'individuals']	["Whether parental psychiatric disorders are associated with autism spectrum disorder (ASD) in offspring has remained inconclusive. We examined the associations of parental psychiatric disorders with ASD in offspring. This population-based case-control study used Taiwan's National Health Insurance Research Database to identify a cohort of children born from 2004 to 2017 and their parents. A total…	asd - autism - children - disorder - social - spectrum - study - disorders - autistic - individuals	0.514475	FALSE
22434281	2013	4	24	Cognitive control of intentions for voluntary actions in individuals with a high level of autistic traits.	-1	-1_asd_autism_children_disorder	['asd', 'autism', 'children', 'disorder', 'social', 'spectrum', 'study', 'disorders', 'autistic', 'individuals']	["Whether parental psychiatric disorders are associated with autism spectrum disorder (ASD) in offspring has remained inconclusive. We examined the associations of parental psychiatric disorders with ASD in offspring. This population-based case-control study used Taiwan's National Health Insurance Research Database to identify a cohort of children born from 2004 to 2017 and their parents. A total…	asd - autism - children - disorder - social - spectrum - study - disorders - autistic - individuals	0.921796	FALSE
22435515	2013	9	12	First preliminary results of an observation of Panax ginseng treatment in patients with autistic disorder.	-1	-1_asd_autism_children_disorder	['asd', 'autism', 'children', 'disorder', 'social', 'spectrum', 'study', 'disorders', 'autistic', 'individuals']	["Whether parental psychiatric disorders are associated with autism spectrum disorder (ASD) in offspring has remained inconclusive. We examined the associations of parental psychiatric disorders with ASD in offspring. This population-based case-control study used Taiwan's National Health Insurance Research Database to identify a cohort of children born from 2004 to 2017 and their parents. A total…	asd - autism - children - disorder - social - spectrum - study - disorders - autistic - individuals	0.3493	FALSE
22447071	2013	4	24	Implicit social learning in relation to autistic-like traits.	3	3_gaze_eye_attention_tracking	['gaze', 'eye', 'attention', 'tracking', 'visual', 'social', 'faces', 'stimuli', 'face', 'looking']	["Eye-gaze methods offer numerous advantages for studying cognitive processes in children with autism spectrum disorder (ASD), but data loss may threaten the validity and generalizability of results. Some eye-gaze systems may be more vulnerable to data loss than others, but to our knowledge, this issue has not been empirically investigated. In the current study, we asked whether automatic eye-tra…	gaze - eye - attention - tracking - visual - social - faces - stimuli - face - looking	0.159391	FALSE
22447748	2013	3	20	Genetic testing for autism spectrum disorders.	-1	-1_asd_autism_children_disorder	['asd', 'autism', 'children', 'disorder', 'social', 'spectrum', 'study', 'disorders', 'autistic', 'individuals']	["Whether parental psychiatric disorders are associated with autism spectrum disorder (ASD) in offspring has remained inconclusive. We examined the associations of parental psychiatric disorders with ASD in offspring. This population-based case-control study used Taiwan's National Health Insurance Research Database to identify a cohort of children born from 2004 to 2017 and their parents. A total…	asd - autism - children - disorder - social - spectrum - study - disorders - autistic - individuals	0.699964	FALSE
22450702	2013	4	18	Brief report: the relationship between visual acuity, the embedded figures test and systemizing in autism spectrum disorders.	10	10_memory_visual_processing_perceptual	['memory', 'visual', 'processing', 'perceptual', 'task', 'motion', 'perception', 'local', 'tasks', 'global']	['What does an individual with autism spectrum disorder (ASD) perceive first: the forest or the trees? In spite of 30 years of research and influential theories like the weak central coherence (WCC) theory and the enhanced perceptual functioning (EPF) account, the interplay of local and global visual processing in ASD remains only partly understood. Research findings vary in indicating a local pr…	memory - visual - processing - perceptual - task - motion - perception - local - tasks - global	1	FALSE
22453928	2013	4	24	Sex differences in children with autism spectrum disorder identified within a high-risk infant cohort.	26	26_females_camouflaging_sex_girls	['females', 'camouflaging', 'sex', 'girls', 'males', 'gender', 'differences', 'women', 'female', 'boys']	['There is lack of consensus in the literature regarding sex differences in social outcomes for individuals on the autism spectrum. Furthermore, little research has focused on the social experiences of high school students with autism spectrum disorder (ASD) during the school day. Using a large racially/ethnically diverse sample of high school students with ASD receiving special education service…	females - camouflaging - sex - girls - males - gender - differences - women - female - boys	1	FALSE
22456820	2013	4	24	Are prenatal ultrasound scans associated with the autism phenotype? Follow-up of a randomised controlled trial.	5	5_birth_risk_born_95	['birth', 'risk', 'born', '95', 'ci', 'preterm', 'maternal', 'perinatal', 'age', 'factors']	['We sought to estimate the prevalence of autism spectrum disorder (ASD) in children born extremely preterm relative to the U.S. population risk of 1.5% [CDC, 2014] using the best-available diagnostic procedures and minimizing confounding with other neurodevelopmental impairments. Eight hundred and eighty nine of 966 (92%) 10-year-old children from the Extremely Low Gestational Age Newborn birth …	birth - risk - born - 95 - ci - preterm - maternal - perinatal - age - factors	0.0440428	FALSE
22460295	2013	1	15	The Frankfurt early intervention program FFIP for preschool aged children with autism spectrum disorder: a pilot study.	-1	-1_asd_autism_children_disorder	['asd', 'autism', 'children', 'disorder', 'social', 'spectrum', 'study', 'disorders', 'autistic', 'individuals']	["Whether parental psychiatric disorders are associated with autism spectrum disorder (ASD) in offspring has remained inconclusive. We examined the associations of parental psychiatric disorders with ASD in offspring. This population-based case-control study used Taiwan's National Health Insurance Research Database to identify a cohort of children born from 2004 to 2017 and their parents. A total…	asd - autism - children - disorder - social - spectrum - study - disorders - autistic - individuals	0.460909	FALSE
22466688	2013	4	24	Microglia in the cerebral cortex in autism.	-1	-1_asd_autism_children_disorder	['asd', 'autism', 'children', 'disorder', 'social', 'spectrum', 'study', 'disorders', 'autistic', 'individuals']	["Whether parental psychiatric disorders are associated with autism spectrum disorder (ASD) in offspring has remained inconclusive. We examined the associations of parental psychiatric disorders with ASD in offspring. This population-based case-control study used Taiwan's National Health Insurance Research Database to identify a cohort of children born from 2004 to 2017 and their parents. A total…	asd - autism - children - disorder - social - spectrum - study - disorders - autistic - individuals	0.745071	FALSE
22466689	2013	4	24	Rating parent-child interactions: joint engagement, communication dynamics, and shared topics in autism, Down syndrome, and typical development.	-1	-1_asd_autism_children_disorder	['asd', 'autism', 'children', 'disorder', 'social', 'spectrum', 'study', 'disorders', 'autistic', 'individuals']	["Whether parental psychiatric disorders are associated with autism spectrum disorder (ASD) in offspring has remained inconclusive. We examined the associations of parental psychiatric disorders with ASD in offspring. This population-based case-control study used Taiwan's National Health Insurance Research Database to identify a cohort of children born from 2004 to 2017 and their parents. A total…	asd - autism - children - disorder - social - spectrum - study - disorders - autistic - individuals	0.448879	FALSE
22468644	2013	9	2	Coherence and other autistic spectrum traits and eating disorders: building from mechanism to treatment. The Birgit Olsson lecture.	77	77_eating_nervosa_anorexia_traits	['eating', 'nervosa', 'anorexia', 'traits', 'ed', 'eds', 'women', 'autistic', 'disordered', 'behaviours']	["This study explores autistic women's experiences of eating disorder services. About 20%-30% of people with anorexia nervosa are also autistic, and current treatments seem not to work as well for them. We interviewed 15 autistic women with experience of anorexia nervosa, 12 parents of autistic women with anorexia nervosa, and 11 healthcare professionals working in eating disorder services. We as…	eating - nervosa - anorexia - traits - ed - eds - women - autistic - disordered - behaviours	1	FALSE
22469462	2013	3	14	AutismPro system in supporting treatment of children with autism in Poland.	8	8_intervention_parent_interventions_training	['intervention', 'parent', 'interventions', 'training', 'early', 'parents', 'program', 'eibi', 'esdm', 'child']	['Although data from parent-implemented Naturalistic Developmental Behavioral Interventions have shown positive effects on decreasing core symptoms of autism, there has been limited examination of the effectiveness of Naturalistic Developmental Behavioral Interventions in community settings. In addition, parent perspectives of their involvement in parent-implemented early intervention programs ha…	intervention - parent - interventions - training - early - parents - program - eibi - esdm - child	0.0892562	FALSE
22471524	2013	6	25	Use and cost of psychotropic drugs among recipients with autism in a state Medicaid fee-for-service programme.	70	70_psychotropic_antipsychotic_medication_antipsychotics	['psychotropic', 'antipsychotic', 'medication', 'antipsychotics', 'prescribed', 'medications', 'prescription', 'use', 'polypharmacy', 'drugs']	['The goal of this study was to examine rates of psychotropic medication use and identify associated child and family characteristics among children and adolescents with autism spectrum disorder (ASD) enrolled in an autism registry maintained by the Autism Treatment Network (ATN).The sample, derived from the ATN registry, consists of 2853 children aged 2 to 17 years with diagnoses of ASD supporte…	psychotropic - antipsychotic - medication - antipsychotics - prescribed - medications - prescription - use - polypharmacy - drugs	1	FALSE
22472874	2013	5	7	Modeling psychiatric disorders at the cellular and network levels.	39	39_stem_cells_pluripotent_ipsc	['stem', 'cells', 'pluripotent', 'ipsc', 'ipscs', 'cell', 'human', 'neurons', 'derived', 'induced']	['Autism spectrum disorder (ASD) is a complex neurodevelopmental disorder characterized by deficits in social cognition, language development, and repetitive/restricted behaviors. Due to the complexity and heterogeneity of ASD and lack of a proper human cellular model system, the pathophysiological mechanism of ASD during the developmental process is largely unknown. However, recent progress in i…	stem - cells - pluripotent - ipsc - ipscs - cell - human - neurons - derived - induced	0.29012	FALSE
22473836	2013	6	13	Cognitive, environmental, and linguistic predictors of syntax in fragile X syndrome and Down syndrome.	59	59_fxs_fragile_syndrome_boys	['fxs', 'fragile', 'syndrome', 'boys', 'premutation', 'males', 'anxiety', 'fmr1', 'social', 'language']	['Fragile X syndrome (FXS) is the most common known genetic cause of autism spectrum disorder (ASD). Although 50-75\u2009% of children with FXS meet ASD criteria, no studies have compared ASD symptoms in infants with FXS versus other high risk groups, such as siblings of children with ASD (ASIBs). Using the Autism Observation Scale for Infants, our findings indicate that 53\u2009% of 12-month inf…	fxs - fragile - syndrome - boys - premutation - males - anxiety - fmr1 - social - language	0.174869	FALSE
22475181	2015	2	9	Measuring the effects of alexithymia on perception of emotional vocalizations in autistic spectrum disorder and typical development.	122	122_alexithymia_tas_empathy_interoceptive	['alexithymia', 'tas', 'empathy', 'interoceptive', 'emotional', 'traits', 'emotions', 'interoception', 'autistic', 'difficulties']	["Alexithymia refers to pronounced difficulty in identifying and describing one's own emotions and is associated with an externally oriented focus of thinking. Alexithymia is known to be much more common in adults with autism spectrum disorders (ASD) compared with the typically developing (TD) adult population. However, we know very little about alexithymia in young children with ASD and advancin…	alexithymia - tas - empathy - interoceptive - emotional - traits - emotions - interoception - autistic - difficulties	1	FALSE
22477468	2013	4	24	Daytime secretion of salivary cortisol and alpha-amylase in preschool-aged children with autism and typically developing children.	-1	-1_asd_autism_children_disorder	['asd', 'autism', 'children', 'disorder', 'social', 'spectrum', 'study', 'disorders', 'autistic', 'individuals']	["Whether parental psychiatric disorders are associated with autism spectrum disorder (ASD) in offspring has remained inconclusive. We examined the associations of parental psychiatric disorders with ASD in offspring. This population-based case-control study used Taiwan's National Health Insurance Research Database to identify a cohort of children born from 2004 to 2017 and their parents. A total…	asd - autism - children - disorder - social - spectrum - study - disorders - autistic - individuals	0.835672	FALSE
22483074	2013	5	22	Processing of novel and familiar faces in infants at average and high risk for autism.	3	3_gaze_eye_attention_tracking	['gaze', 'eye', 'attention', 'tracking', 'visual', 'social', 'faces', 'stimuli', 'face', 'looking']	["Eye-gaze methods offer numerous advantages for studying cognitive processes in children with autism spectrum disorder (ASD), but data loss may threaten the validity and generalizability of results. Some eye-gaze systems may be more vulnerable to data loss than others, but to our knowledge, this issue has not been empirically investigated. In the current study, we asked whether automatic eye-tra…	gaze - eye - attention - tracking - visual - social - faces - stimuli - face - looking	0.141071	FALSE
22483267	2013	4	22	Mining and modeling human genetics for autism therapeutics.	2	2_synaptic_genes_mice_protein	['synaptic', 'genes', 'mice', 'protein', 'mouse', 'gene', 'mutations', 'cell', 'proteins', 'expression']	['Recent advances in human genetics identified genetic variants involved in causing autism spectrum disorders (ASDs). Mouse models that mimic mutations found in patients with ASD exhibit behavioral phenotypes consistent with ASD symptoms. These mouse models suggest critical biological factors of ASD etiology. Another important implication of ASD genetics is the enrichment of ASD risk genes in mol…	synaptic - genes - mice - protein - mouse - gene - mutations - cell - proteins - expression	0.270051	FALSE
22484793	2013	4	24	Network characteristics, perceived social support, and psychological adjustment in mothers of children with autism spectrum disorder.	4	4_parenting_stress_mothers_parents	['parenting', 'stress', 'mothers', 'parents', 'coping', 'child', 'fathers', 'family', 'parental', 'support']	['The aim of the study was to investigate the perception of the family functioning in parents of children with autism spectrum disorders (ASD) with normal-range intelligence and the relationships between family functioning, parenting stress and quality of life. Dyads of parents of children with ASD without intellectual disability and parents of typically developing children (controls) completed a…	parenting - stress - mothers - parents - coping - child - fathers - family - parental - support	0.0802891	FALSE
22484794	2013	4	24	Predicting developmental status from 12 to 24 months in infants at risk for Autism Spectrum Disorder: a preliminary report.	0	0_diagnostic_screening_dsm_diagnosis	['diagnostic', 'screening', 'dsm', 'diagnosis', 'autism', 'ados', 'chat', 'months', 'developmental', 'specificity']	["The Modified Checklist for Autism in Toddlers (M-CHAT) could be appropriate for universal screening for autism spectrum disorder (ASD) at 18 months and 24 months. Validation studies, however, reported differences in psychometric properties across sample populations. This meta-analysis summarized its accuracy measures and quantified their change in relation to patient and study characteristics.F…	diagnostic - screening - dsm - diagnosis - autism - ados - chat - months - developmental - specificity	0.247969	FALSE
22492990	2013	1	14	Enriched rearing improves behavioral responses of an animal model for CNV-based autistic-like traits.	-1	-1_asd_autism_children_disorder	['asd', 'autism', 'children', 'disorder', 'social', 'spectrum', 'study', 'disorders', 'autistic', 'individuals']	["Whether parental psychiatric disorders are associated with autism spectrum disorder (ASD) in offspring has remained inconclusive. We examined the associations of parental psychiatric disorders with ASD in offspring. This population-based case-control study used Taiwan's National Health Insurance Research Database to identify a cohort of children born from 2004 to 2017 and their parents. A total…	asd - autism - children - disorder - social - spectrum - study - disorders - autistic - individuals	0.630417	FALSE
22495745	2014	4	14	Functional connectivity for an "island of sparing" in autism spectrum disorder: an fMRI study of visual search.	9	9_connectivity_functional_network_brain	['connectivity', 'functional', 'network', 'brain', 'networks', 'resting', 'state', 'dmn', 'regions', 'default']	['Autism spectrum disorder (ASD) is a neurodevelopmental disorder associated with social communication deficits and restricted/repetitive behaviors and is characterized by large-scale atypical subcortical-cortical connectivity, including impaired resting-state functional connectivity between thalamic and sensory regions. Previous studies have typically focused on the abnormal static connectivity …	connectivity - functional - network - brain - networks - resting - state - dmn - regions - default	0.0377416	FALSE
22500773	2013	1	25	Altered structural brain connectivity in healthy carriers of the autism risk gene, CNTNAP2.	-1	-1_asd_autism_children_disorder	['asd', 'autism', 'children', 'disorder', 'social', 'spectrum', 'study', 'disorders', 'autistic', 'individuals']	["Whether parental psychiatric disorders are associated with autism spectrum disorder (ASD) in offspring has remained inconclusive. We examined the associations of parental psychiatric disorders with ASD in offspring. This population-based case-control study used Taiwan's National Health Insurance Research Database to identify a cohort of children born from 2004 to 2017 and their parents. A total…	asd - autism - children - disorder - social - spectrum - study - disorders - autistic - individuals	0.680999	FALSE
22503282	2013	9	25	Zoom-out attentional impairment in children with autism spectrum disorder.	3	3_gaze_eye_attention_tracking	['gaze', 'eye', 'attention', 'tracking', 'visual', 'social', 'faces', 'stimuli', 'face', 'looking']	["Eye-gaze methods offer numerous advantages for studying cognitive processes in children with autism spectrum disorder (ASD), but data loss may threaten the validity and generalizability of results. Some eye-gaze systems may be more vulnerable to data loss than others, but to our knowledge, this issue has not been empirically investigated. In the current study, we asked whether automatic eye-tra…	gaze - eye - attention - tracking - visual - social - faces - stimuli - face - looking	0.485194	FALSE
22504060	2013	2	15	Brain water channel proteins in health and disease.	96	96_channel_scn2a_channels_voltage	['channel', 'scn2a', 'channels', 'voltage', 'variants', 'gated', 'scn8a', 'sodium', 'calcium', 'mutation']	['Autism spectrum disorder is a complex-genetic disease and its etiology is unknown for the majority of cases. So far, more than one hundred different susceptibility genes were detected. Voltage-gated calcium channels are among the candidates linked to autism spectrum disorder by results of genetic studies. Mutations of nearly all pore-forming and some auxiliary subunits of voltage gated calcium …	channel - scn2a - channels - voltage - variants - gated - scn8a - sodium - calcium - mutation	1	FALSE
22505330	2014	4	14	Atypical brain activation patterns during a face-to-face joint attention game in adults with autism spectrum disorder.	-1	-1_asd_autism_children_disorder	['asd', 'autism', 'children', 'disorder', 'social', 'spectrum', 'study', 'disorders', 'autistic', 'individuals']	["Whether parental psychiatric disorders are associated with autism spectrum disorder (ASD) in offspring has remained inconclusive. We examined the associations of parental psychiatric disorders with ASD in offspring. This population-based case-control study used Taiwan's National Health Insurance Research Database to identify a cohort of children born from 2004 to 2017 and their parents. A total…	asd - autism - children - disorder - social - spectrum - study - disorders - autistic - individuals	0.609483	FALSE
22506855	2013	6	28	Neuropsychological evaluation in an adolescent with cerebellar hypoplasia diagnosed with Asperger's Syndrome.	102	102_cerebellar_cerebellum_crus_motor	['cerebellar', 'cerebellum', 'crus', 'motor', 'purkinje', 'granule', 'connectivity', 'cells', 'functions', 'functional']	['The cerebellum has long been conceptualized to control motor learning and motor coordination. However, increasing evidence suggests its roles in cognition and emotion behaviors. In particular, the cerebellum has been recognized as one of key brain regions affected in autism spectrum disorder (ASD). To better understand the contribution of the cerebellum in ASD pathogenesis, we here discuss rece…	cerebellar - cerebellum - crus - motor - purkinje - granule - connectivity - cells - functions - functional	1	FALSE
22515401	2013	12	26	Finding out what matters: validity of quality of life measurement in young people with ASD.	110	110_qol_quality_life_vida	['qol', 'quality', 'life', 'vida', 'calidad', 'pedsql', 'fqol', 'functioning', 'health', 'disability']	["\u2003 Compared with other conditions there has been a lack of focus on quality of life (QoL) as an outcome measure for children and young people with Autism Spectrum Disorder (ASD). This pilot study aimed to evaluate the validity of existing QoL questionnaires for use with children with ASD aged 8-12 years.\u2003 A literature review (1990-2011) identified the PedsQL (Pediatric Quality of Life …	qol - quality - life - vida - calidad - pedsql - fqol - functioning - health - disability	1	TRUE
22521893	2013	2	14	Salivary antioxidants and oral health in children with autism.	27	27_dental_oral_care_caries	['dental', 'oral', 'care', 'caries', 'hygiene', 'health', 'dmft', 'teeth', 'children', 'orthodontic']	['Autism spectrum disorder (ASD) is characterized by impairments in social interaction and communication, restricted patterns of behaviour, and unusual sensory sensitivities. The hypotheses to be tested were that adult patients with ASD have a higher caries prevalence, have more risk factors for caries development, and utilize dental health care to a lesser extent than people recruited from the n…	dental - oral - care - caries - hygiene - health - dmft - teeth - children - orthodontic	0.296335	FALSE
22527700	2013	4	24	Left visual field biases when infants process faces: a comparison of infants at high- and low-risk for autism spectrum disorder.	3	3_gaze_eye_attention_tracking	['gaze', 'eye', 'attention', 'tracking', 'visual', 'social', 'faces', 'stimuli', 'face', 'looking']	["Eye-gaze methods offer numerous advantages for studying cognitive processes in children with autism spectrum disorder (ASD), but data loss may threaten the validity and generalizability of results. Some eye-gaze systems may be more vulnerable to data loss than others, but to our knowledge, this issue has not been empirically investigated. In the current study, we asked whether automatic eye-tra…	gaze - eye - attention - tracking - visual - social - faces - stimuli - face - looking	0.165515	FALSE
22527701	2013	4	24	Dialogic linkage and resonance in autism.	1	1_language_children_speech_expressive	['language', 'children', 'speech', 'expressive', 'verbal', 'vocabulary', 'pragmatic', 'words', 'word', 'communication']	['Both small-scale and epidemiological longitudinal studies of early language delay indicate that most late talkers attain language scores in the average range by age 5, 6, or 7. However, late talker groups typically obtain significantly lower scores than groups with typical language histories on most language measures into adolescence. These findings support a dimensional account of language del…	language - children - speech - expressive - verbal - vocabulary - pragmatic - words - word - communication	0.178816	FALSE
22527702	2013	3	19	'History and first descriptions' of autism: a response to Michael Fitzgerald.	-1	-1_asd_autism_children_disorder	['asd', 'autism', 'children', 'disorder', 'social', 'spectrum', 'study', 'disorders', 'autistic', 'individuals']	["Whether parental psychiatric disorders are associated with autism spectrum disorder (ASD) in offspring has remained inconclusive. We examined the associations of parental psychiatric disorders with ASD in offspring. This population-based case-control study used Taiwan's National Health Insurance Research Database to identify a cohort of children born from 2004 to 2017 and their parents. A total…	asd - autism - children - disorder - social - spectrum - study - disorders - autistic - individuals	0.660072	FALSE
22527703	2013	4	24	From interdisciplinary to integrated care of the child with autism: the essential role for a code of ethics.	-1	-1_asd_autism_children_disorder	['asd', 'autism', 'children', 'disorder', 'social', 'spectrum', 'study', 'disorders', 'autistic', 'individuals']	["Whether parental psychiatric disorders are associated with autism spectrum disorder (ASD) in offspring has remained inconclusive. We examined the associations of parental psychiatric disorders with ASD in offspring. This population-based case-control study used Taiwan's National Health Insurance Research Database to identify a cohort of children born from 2004 to 2017 and their parents. A total…	asd - autism - children - disorder - social - spectrum - study - disorders - autistic - individuals	0.801959	FALSE
22527704	2013	4	18	The relationship between anxiety and repetitive behaviours in autism spectrum disorder.	30	30_anxiety_symptoms_social_parent	['anxiety', 'symptoms', 'social', 'parent', 'youth', 'sad', 'children', 'asd', 'uncertainty', 'iu']	['Children with Autism Spectrum Disorder are vulnerable to anxiety. Repetitive behaviours are a core feature of Autism Spectrum Disorder (ASD) and have been associated anxiety. This study examined repetitive behaviours and anxiety in two groups of children with autism spectrum disorder, those with high anxiety and those with lower levels of anxiety. Children with high anxiety had more repetitive …	anxiety - symptoms - social - parent - youth - sad - children - asd - uncertainty - iu	0.160466	TRUE
22527705	2013	4	24	Brief report: Insight into illness and social attributional style in Asperger's syndrome.	-1	-1_asd_autism_children_disorder	['asd', 'autism', 'children', 'disorder', 'social', 'spectrum', 'study', 'disorders', 'autistic', 'individuals']	["Whether parental psychiatric disorders are associated with autism spectrum disorder (ASD) in offspring has remained inconclusive. We examined the associations of parental psychiatric disorders with ASD in offspring. This population-based case-control study used Taiwan's National Health Insurance Research Database to identify a cohort of children born from 2004 to 2017 and their parents. A total…	asd - autism - children - disorder - social - spectrum - study - disorders - autistic - individuals	0.0682384	FALSE
22527707	2013	4	24	Brief report: The relationship between language skills, adaptive behavior, and emotional and behavior problems in pre-schoolers with autism.	1	1_language_children_speech_expressive	['language', 'children', 'speech', 'expressive', 'verbal', 'vocabulary', 'pragmatic', 'words', 'word', 'communication']	['Both small-scale and epidemiological longitudinal studies of early language delay indicate that most late talkers attain language scores in the average range by age 5, 6, or 7. However, late talker groups typically obtain significantly lower scores than groups with typical language histories on most language measures into adolescence. These findings support a dimensional account of language del…	language - children - speech - expressive - verbal - vocabulary - pragmatic - words - word - communication	0.392385	FALSE
22527708	2013	4	24	An early social engagement intervention for young children with autism and their parents.	-1	-1_asd_autism_children_disorder	['asd', 'autism', 'children', 'disorder', 'social', 'spectrum', 'study', 'disorders', 'autistic', 'individuals']	["Whether parental psychiatric disorders are associated with autism spectrum disorder (ASD) in offspring has remained inconclusive. We examined the associations of parental psychiatric disorders with ASD in offspring. This population-based case-control study used Taiwan's National Health Insurance Research Database to identify a cohort of children born from 2004 to 2017 and their parents. A total…	asd - autism - children - disorder - social - spectrum - study - disorders - autistic - individuals	0.778592	FALSE
22528028	2013	2	1	Facial emotion recognition in children with high functioning autism and children with social phobia.	29	29_emotion_facial_expressions_recognition	['emotion', 'facial', 'expressions', 'recognition', 'emotions', 'emotional', 'face', 'faces', 'happy', 'angry']	["Facial mimicry as well as the accurate assessment of one's performance when judging others' emotional expressions have been suggested to inform successful emotion recognition. Differences in the integration of these two information sources might explain alterations in the perception of others' emotions in individuals with Social Anxiety Disorder and individuals on the autism spectrum. Using a n…	emotion - facial - expressions - recognition - emotions - emotional - face - faces - happy - angry	1	FALSE
22528029	2014	2	24	Longitudinal developmental courses in Japanese children with autism spectrum disorder.	0	0_diagnostic_screening_dsm_diagnosis	['diagnostic', 'screening', 'dsm', 'diagnosis', 'autism', 'ados', 'chat', 'months', 'developmental', 'specificity']	["The Modified Checklist for Autism in Toddlers (M-CHAT) could be appropriate for universal screening for autism spectrum disorder (ASD) at 18 months and 24 months. Validation studies, however, reported differences in psychometric properties across sample populations. This meta-analysis summarized its accuracy measures and quantified their change in relation to patient and study characteristics.F…	diagnostic - screening - dsm - diagnosis - autism - ados - chat - months - developmental - specificity	1	FALSE
22534237	2013	6	26	Non-protein-bound iron and 4-hydroxynonenal protein adducts in classic autism.	81	81_oxidative_stress_antioxidant_glutathione	['oxidative', 'stress', 'antioxidant', 'glutathione', 'gsh', 'plasma', 'levels', 'gssg', 'sod', 'redox']	['Despite increasing evidence of oxidative stress in the pathophysiology of autism, most studies have not evaluated biomarkers within specific brain regions, and the functional consequences of oxidative stress remain relatively understudied. We examined frozen samples from the cerebellum and temporal cortex (Brodmann area 22 (BA22)) from individuals with autism and unaffected controls (n=15 and n…	oxidative - stress - antioxidant - glutathione - gsh - plasma - levels - gssg - sod - redox	1	FALSE
22535309	2013	2	4	Aripiprazole in the treatment of challenging behaviour in adults with autism spectrum disorder.	21	21_risperidone_aripiprazole_irritability_placebo	['risperidone', 'aripiprazole', 'irritability', 'placebo', 'treatment', 'mg', 'drug', 'abc', 'effects', 'dose']	['The objective of this trial, Biomarkers in Autism of Aripiprazole and Risperidone Treatment (BAART), was to provide support and guidance for an evidence-based approach for the selection and monitoring of initial pharmacotherapy in patients with autism by assessing predictors of efficacy, tolerability, and safety. This randomized double-blind parallel-group study was conducted in three academic …	risperidone - aripiprazole - irritability - placebo - treatment - mg - drug - abc - effects - dose	1	FALSE
22537103	2013	2	11	The co-occurrence of autism spectrum disorder and attention-deficit/hyperactivity disorder symptoms in parents of children with ASD or ASD with ADHD.	-1	-1_asd_autism_children_disorder	['asd', 'autism', 'children', 'disorder', 'social', 'spectrum', 'study', 'disorders', 'autistic', 'individuals']	["Whether parental psychiatric disorders are associated with autism spectrum disorder (ASD) in offspring has remained inconclusive. We examined the associations of parental psychiatric disorders with ASD in offspring. This population-based case-control study used Taiwan's National Health Insurance Research Database to identify a cohort of children born from 2004 to 2017 and their parents. A total…	asd - autism - children - disorder - social - spectrum - study - disorders - autistic - individuals	0.765648	FALSE
22537536	2013	2	12	Effects of a dolphin interaction program on children with autism spectrum disorders: an exploratory research.	-1	-1_asd_autism_children_disorder	['asd', 'autism', 'children', 'disorder', 'social', 'spectrum', 'study', 'disorders', 'autistic', 'individuals']	["Whether parental psychiatric disorders are associated with autism spectrum disorder (ASD) in offspring has remained inconclusive. We examined the associations of parental psychiatric disorders with ASD in offspring. This population-based case-control study used Taiwan's National Health Insurance Research Database to identify a cohort of children born from 2004 to 2017 and their parents. A total…	asd - autism - children - disorder - social - spectrum - study - disorders - autistic - individuals	0.227818	FALSE
22538295	2013	5	3	Mitochondrial and ion channel gene alterations in autism.	-1	-1_asd_autism_children_disorder	['asd', 'autism', 'children', 'disorder', 'social', 'spectrum', 'study', 'disorders', 'autistic', 'individuals']	["Whether parental psychiatric disorders are associated with autism spectrum disorder (ASD) in offspring has remained inconclusive. We examined the associations of parental psychiatric disorders with ASD in offspring. This population-based case-control study used Taiwan's National Health Insurance Research Database to identify a cohort of children born from 2004 to 2017 and their parents. A total…	asd - autism - children - disorder - social - spectrum - study - disorders - autistic - individuals	0.197321	FALSE
22541665	2013	6	26	Pharmacotherapy of autism spectrum disorders.	21	21_risperidone_aripiprazole_irritability_placebo	['risperidone', 'aripiprazole', 'irritability', 'placebo', 'treatment', 'mg', 'drug', 'abc', 'effects', 'dose']	['The objective of this trial, Biomarkers in Autism of Aripiprazole and Risperidone Treatment (BAART), was to provide support and guidance for an evidence-based approach for the selection and monitoring of initial pharmacotherapy in patients with autism by assessing predictors of efficacy, tolerability, and safety. This randomized double-blind parallel-group study was conducted in three academic …	risperidone - aripiprazole - irritability - placebo - treatment - mg - drug - abc - effects - dose	0.506458	FALSE
22543975	2013	6	25	Evaluation of copy number variations reveals novel candidate genes in autism spectrum disorder-associated pathways.	-1	-1_asd_autism_children_disorder	['asd', 'autism', 'children', 'disorder', 'social', 'spectrum', 'study', 'disorders', 'autistic', 'individuals']	["Whether parental psychiatric disorders are associated with autism spectrum disorder (ASD) in offspring has remained inconclusive. We examined the associations of parental psychiatric disorders with ASD in offspring. This population-based case-control study used Taiwan's National Health Insurance Research Database to identify a cohort of children born from 2004 to 2017 and their parents. A total…	asd - autism - children - disorder - social - spectrum - study - disorders - autistic - individuals	0.142174	FALSE
22544388	2014	1	15	Atomoxetine for treating ADHD symptoms in autism: a systematic review.	119	119_adhd_atx_atomoxetine_methylphenidate	['adhd', 'atx', 'atomoxetine', 'methylphenidate', 'hyperactivity', 'pt', 'treatment', 'medication', 'mph', 'symptoms']	['Clinically significant attention-deficit/hyperactivity disorder (ADHD) symptoms are common and impairing in children and youth with autism spectrum disorder(ASD). The aim of this systematic review and meta-analysis was to (a) evaluate the efficacy and safety of pharmacotherapy for the treatment of ADHD symptoms in ASD and (b) distil findings for clinical translation.We searched electronic datab…	adhd - atx - atomoxetine - methylphenidate - hyperactivity - pt - treatment - medication - mph - symptoms	1	FALSE
22544470	2013	6	28	Brief report: oxytocin enhances paternal sensitivity to a child with autism: a double-blind within-subject experiment with intranasally administered oxytocin.	14	14_oxytocin_ot_oxt_oxtr	['oxytocin', 'ot', 'oxt', 'oxtr', 'intranasal', 'administration', 'social', 'avp', 'placebo', 'neuropeptide']	['Autism spectrum disorder is a behavioral disorder characterized by impairments in social interaction and communication together with the presence of stereotyped behaviors and restricted interests. Although highly genetic, its etiology is complex which correlates with the extensive heterogeneity found in its clinical manifestation, adding to the challenge of understanding its pathophysiology and…	oxytocin - ot - oxt - oxtr - intranasal - administration - social - avp - placebo - neuropeptide	0.888511	FALSE
22545843	2013	8	9	Deficit, difference, or both? Autism and neurodiversity.	0	0_diagnostic_screening_dsm_diagnosis	['diagnostic', 'screening', 'dsm', 'diagnosis', 'autism', 'ados', 'chat', 'months', 'developmental', 'specificity']	["The Modified Checklist for Autism in Toddlers (M-CHAT) could be appropriate for universal screening for autism spectrum disorder (ASD) at 18 months and 24 months. Validation studies, however, reported differences in psychometric properties across sample populations. This meta-analysis summarized its accuracy measures and quantified their change in relation to patient and study characteristics.F…	diagnostic - screening - dsm - diagnosis - autism - ados - chat - months - developmental - specificity	0.147051	FALSE
22546616	2013	9	9	The brain GABA-benzodiazepine receptor alpha-5 subtype in autism spectrum disorder: a pilot [(11)C]Ro15-4513 positron emission tomography study.	67	67_gaba_glutamate_cr_mrs	['gaba', 'glutamate', 'cr', 'mrs', 'glx', 'spectroscopy', 'naa', 'levels', 'cortex', 'acc']	['Imbalanced levels of excitation and inhibition (E/I) have been proposed to account for various behavioral and electrophysiological phenotypes in autism. Although proton magnetic resonance spectroscopy ((1)H-MRS) studies have been published on various metabolite levels in autism, including glutamate, the major excitatory neurotransmitter, few (1)H-MRS studies have yet been conducted the major in…	gaba - glutamate - cr - mrs - glx - spectroscopy - naa - levels - cortex - acc	1	FALSE
22549408	2013	3	19	CNVs leading to fusion transcripts in individuals with autism spectrum disorder.	-1	-1_asd_autism_children_disorder	['asd', 'autism', 'children', 'disorder', 'social', 'spectrum', 'study', 'disorders', 'autistic', 'individuals']	["Whether parental psychiatric disorders are associated with autism spectrum disorder (ASD) in offspring has remained inconclusive. We examined the associations of parental psychiatric disorders with ASD in offspring. This population-based case-control study used Taiwan's National Health Insurance Research Database to identify a cohort of children born from 2004 to 2017 and their parents. A total…	asd - autism - children - disorder - social - spectrum - study - disorders - autistic - individuals	0.191372	FALSE
22549762	2013	1	14	Paliperidone for irritability in adolescents and young adults with autistic disorder.	21	21_risperidone_aripiprazole_irritability_placebo	['risperidone', 'aripiprazole', 'irritability', 'placebo', 'treatment', 'mg', 'drug', 'abc', 'effects', 'dose']	['The objective of this trial, Biomarkers in Autism of Aripiprazole and Risperidone Treatment (BAART), was to provide support and guidance for an evidence-based approach for the selection and monitoring of initial pharmacotherapy in patients with autism by assessing predictors of efficacy, tolerability, and safety. This randomized double-blind parallel-group study was conducted in three academic …	risperidone - aripiprazole - irritability - placebo - treatment - mg - drug - abc - effects - dose	0.23559	FALSE
22550089	2013	7	26	SCN1A mutation associated with intractable myoclonic epilepsy and migraine headache.	-1	-1_asd_autism_children_disorder	['asd', 'autism', 'children', 'disorder', 'social', 'spectrum', 'study', 'disorders', 'autistic', 'individuals']	["Whether parental psychiatric disorders are associated with autism spectrum disorder (ASD) in offspring has remained inconclusive. We examined the associations of parental psychiatric disorders with ASD in offspring. This population-based case-control study used Taiwan's National Health Insurance Research Database to identify a cohort of children born from 2004 to 2017 and their parents. A total…	asd - autism - children - disorder - social - spectrum - study - disorders - autistic - individuals	0.62481	FALSE
22555366	2013	6	28	A common susceptibility factor of both autism and epilepsy: functional deficiency of GABA A receptors.	2	2_synaptic_genes_mice_protein	['synaptic', 'genes', 'mice', 'protein', 'mouse', 'gene', 'mutations', 'cell', 'proteins', 'expression']	['Recent advances in human genetics identified genetic variants involved in causing autism spectrum disorders (ASDs). Mouse models that mimic mutations found in patients with ASD exhibit behavioral phenotypes consistent with ASD symptoms. These mouse models suggest critical biological factors of ASD etiology. Another important implication of ASD genetics is the enrichment of ASD risk genes in mol…	synaptic - genes - mice - protein - mouse - gene - mutations - cell - proteins - expression	0.155117	FALSE
22560338	2013	4	22	Targeted treatment trials for tuberous sclerosis and autism: no longer a dream.	-1	-1_asd_autism_children_disorder	['asd', 'autism', 'children', 'disorder', 'social', 'spectrum', 'study', 'disorders', 'autistic', 'individuals']	["Whether parental psychiatric disorders are associated with autism spectrum disorder (ASD) in offspring has remained inconclusive. We examined the associations of parental psychiatric disorders with ASD in offspring. This population-based case-control study used Taiwan's National Health Insurance Research Database to identify a cohort of children born from 2004 to 2017 and their parents. A total…	asd - autism - children - disorder - social - spectrum - study - disorders - autistic - individuals	0.602907	FALSE
22562209	2013	6	28	Is maternal influenza or fever during pregnancy associated with autism or developmental delays? Results from the CHARGE (CHildhood Autism Risks from Genetics and Environment) study.	-1	-1_asd_autism_children_disorder	['asd', 'autism', 'children', 'disorder', 'social', 'spectrum', 'study', 'disorders', 'autistic', 'individuals']	["Whether parental psychiatric disorders are associated with autism spectrum disorder (ASD) in offspring has remained inconclusive. We examined the associations of parental psychiatric disorders with ASD in offspring. This population-based case-control study used Taiwan's National Health Insurance Research Database to identify a cohort of children born from 2004 to 2017 and their parents. A total…	asd - autism - children - disorder - social - spectrum - study - disorders - autistic - individuals	0.433918	FALSE
22562210	2013	6	28	The structure of autism spectrum disorder symptoms in the general population at 18Â months.	0	0_diagnostic_screening_dsm_diagnosis	['diagnostic', 'screening', 'dsm', 'diagnosis', 'autism', 'ados', 'chat', 'months', 'developmental', 'specificity']	["The Modified Checklist for Autism in Toddlers (M-CHAT) could be appropriate for universal screening for autism spectrum disorder (ASD) at 18 months and 24 months. Validation studies, however, reported differences in psychometric properties across sample populations. This meta-analysis summarized its accuracy measures and quantified their change in relation to patient and study characteristics.F…	diagnostic - screening - dsm - diagnosis - autism - ados - chat - months - developmental - specificity	0.218668	FALSE
22562829	2013	6	13	Finiteness marking in boys with fragile X syndrome.	59	59_fxs_fragile_syndrome_boys	['fxs', 'fragile', 'syndrome', 'boys', 'premutation', 'males', 'anxiety', 'fmr1', 'social', 'language']	['Fragile X syndrome (FXS) is the most common known genetic cause of autism spectrum disorder (ASD). Although 50-75\u2009% of children with FXS meet ASD criteria, no studies have compared ASD symptoms in infants with FXS versus other high risk groups, such as siblings of children with ASD (ASIBs). Using the Autism Observation Scale for Infants, our findings indicate that 53\u2009% of 12-month inf…	fxs - fragile - syndrome - boys - premutation - males - anxiety - fmr1 - social - language	0.278395	FALSE
22566142	2013	2	13	Computational model of excitatory/inhibitory ratio imbalance role in attention deficit disorders.	-1	-1_asd_autism_children_disorder	['asd', 'autism', 'children', 'disorder', 'social', 'spectrum', 'study', 'disorders', 'autistic', 'individuals']	["Whether parental psychiatric disorders are associated with autism spectrum disorder (ASD) in offspring has remained inconclusive. We examined the associations of parental psychiatric disorders with ASD in offspring. This population-based case-control study used Taiwan's National Health Insurance Research Database to identify a cohort of children born from 2004 to 2017 and their parents. A total…	asd - autism - children - disorder - social - spectrum - study - disorders - autistic - individuals	0.919776	FALSE
22566537	2013	4	19	Zebrafish homologs of genes within 16p11.2, a genomic region associated with brain disorders, are active during brain development, and include two deletion dosage sensor genes.	36	36_vpa_rats_valproic_exposure	['vpa', 'rats', 'valproic', 'exposure', 'exposed', 'zebrafish', 'acid', 'bpa', 'model', 'rat']	['Autism spectrum disorder (ASD) is a pervasive developmental disorder characterized by three main behavioral symptoms including social deficits, impaired communication, and stereotyped and repetitive behaviors. ASD prevalence shows gender bias to male. Prenatal exposure to valproic acid (VPA), a drug used in epilepsy and bipolar disorder, induces autistic symptoms in both human and rodents. As w…	vpa - rats - valproic - exposure - exposed - zebrafish - acid - bpa - model - rat	0.010403	FALSE
22569187	2014	3	10	Neural correlates of moral reasoning in autism spectrum disorder.	72	72_empathy_empathic_traits_emotional	['empathy', 'empathic', 'traits', 'emotional', 'moral', 'eq', 'pain', 'self', 'cu', 'emotion']	['The Empathy Quotient (EQ) self-report questionnaire is used to measure empathy in individuals with clinical conditions that have been associated with social impairments. In this study, older teens and adults with autism spectrum disorder (ASD; N\u202f=\u202f60), early psychosis (EP; N\u202f=\u202f51) and social anxiety disorder (SAD; N\u202f=\u202f71) and neurotypical controls (NT; N\u202f=\u20…	empathy - empathic - traits - emotional - moral - eq - pain - self - cu - emotion	0.154197	FALSE
22570145	2013	6	28	Virtual reality social cognition training for young adults with high-functioning autism.	109	109_virtual_vr_reality_based	['virtual', 'vr', 'reality', 'based', 'skills', 'game', 'intervention', 'la', 'technologies', 'immersive']	['Initially designed for the treatment of phobias, the use of virtual reality in phobic disorders has expanded to other mental health disorders such as posttraumatic stress disorder, substance-related disorders, eating disorders, psychosis, and autism spectrum disorder. The goal of this review is to provide an accessible understanding of why this approach is important for future practice, given i…	virtual - vr - reality - based - skills - game - intervention - la - technologies - immersive	1	FALSE
22574686	2013	2	11	Latent class analysis of early developmental trajectory in baby siblings of children with autism.	0	0_diagnostic_screening_dsm_diagnosis	['diagnostic', 'screening', 'dsm', 'diagnosis', 'autism', 'ados', 'chat', 'months', 'developmental', 'specificity']	["The Modified Checklist for Autism in Toddlers (M-CHAT) could be appropriate for universal screening for autism spectrum disorder (ASD) at 18 months and 24 months. Validation studies, however, reported differences in psychometric properties across sample populations. This meta-analysis summarized its accuracy measures and quantified their change in relation to patient and study characteristics.F…	diagnostic - screening - dsm - diagnosis - autism - ados - chat - months - developmental - specificity	1	FALSE
22576167	2013	6	28	Social responsiveness and competence in Prader-Willi syndrome: direct comparison to autism spectrum disorder.	-1	-1_asd_autism_children_disorder	['asd', 'autism', 'children', 'disorder', 'social', 'spectrum', 'study', 'disorders', 'autistic', 'individuals']	["Whether parental psychiatric disorders are associated with autism spectrum disorder (ASD) in offspring has remained inconclusive. We examined the associations of parental psychiatric disorders with ASD in offspring. This population-based case-control study used Taiwan's National Health Insurance Research Database to identify a cohort of children born from 2004 to 2017 and their parents. A total…	asd - autism - children - disorder - social - spectrum - study - disorders - autistic - individuals	0.538057	FALSE
22579532	2014	2	26	Complexity of spontaneous brain activity in mental disorders.	-1	-1_asd_autism_children_disorder	['asd', 'autism', 'children', 'disorder', 'social', 'spectrum', 'study', 'disorders', 'autistic', 'individuals']	["Whether parental psychiatric disorders are associated with autism spectrum disorder (ASD) in offspring has remained inconclusive. We examined the associations of parental psychiatric disorders with ASD in offspring. This population-based case-control study used Taiwan's National Health Insurance Research Database to identify a cohort of children born from 2004 to 2017 and their parents. A total…	asd - autism - children - disorder - social - spectrum - study - disorders - autistic - individuals	0.210042	FALSE
22580987	2013	3	20	How useful are screening instruments for toddlers to predict outcome at age 4? General development, language skills, and symptom severity in children with a false positive screen for autism spectrum disorder.	-1	-1_asd_autism_children_disorder	['asd', 'autism', 'children', 'disorder', 'social', 'spectrum', 'study', 'disorders', 'autistic', 'individuals']	["Whether parental psychiatric disorders are associated with autism spectrum disorder (ASD) in offspring has remained inconclusive. We examined the associations of parental psychiatric disorders with ASD in offspring. This population-based case-control study used Taiwan's National Health Insurance Research Database to identify a cohort of children born from 2004 to 2017 and their parents. A total…	asd - autism - children - disorder - social - spectrum - study - disorders - autistic - individuals	0.150952	FALSE
22582764	2013	1	16	Teacher-implemented joint attention intervention: pilot randomized controlled study for preschoolers with autism.	-1	-1_asd_autism_children_disorder	['asd', 'autism', 'children', 'disorder', 'social', 'spectrum', 'study', 'disorders', 'autistic', 'individuals']	["Whether parental psychiatric disorders are associated with autism spectrum disorder (ASD) in offspring has remained inconclusive. We examined the associations of parental psychiatric disorders with ASD in offspring. This population-based case-control study used Taiwan's National Health Insurance Research Database to identify a cohort of children born from 2004 to 2017 and their parents. A total…	asd - autism - children - disorder - social - spectrum - study - disorders - autistic - individuals	0.160114	FALSE
22584617	2013	6	28	The Triple I Hypothesis: taking another('s) perspective on executive dysfunction in autism.	47	47_ef_executive_memory_cognitive	['ef', 'executive', 'memory', 'cognitive', 'working', 'function', 'adaptive', 'functioning', 'performance', 'flexibility']	['Performance on a single executive function (EF) task (e.g., a card sorting task) is often taken to represent ability on the underlying subcomponent of EF (e.g., set shifting) without accounting for the non-specific and non-executive skills employed to complete the task. This study used a manualised battery of EF tasks to derive individual task scores and latent EF scores. Seventy-nine adolescen…	ef - executive - memory - cognitive - working - function - adaptive - functioning - performance - flexibility	1	FALSE
22588377	2013	6	28	The Coping Cat program for children with anxiety and autism spectrum disorder: a pilot randomized controlled trial.	83	83_cbt_anxiety_treatment_youth	['cbt', 'anxiety', 'treatment', 'youth', 'therapy', 'cognitive', 'adapted', 'tau', 'post', 'efficacy']	['Previous Cochrane Reviews have shown that cognitive behavioural therapy (CBT) is effective in treating childhood anxiety disorders. However, questions remain regarding the following: up-to-date evidence of the relative efficacy and acceptability of CBT compared to waiting lists/no treatment, treatment as usual, attention controls, and alternative treatments; benefits across a range of outcomes;…	cbt - anxiety - treatment - youth - therapy - cognitive - adapted - tau - post - efficacy	1	FALSE
22589251	2013	6	25	Alterations of social interaction through genetic and environmental manipulation of the 22q11.2 gene Sept5 in the mouse brain.	16	16_deletion_duplication_16p11_22q11	['deletion', 'duplication', '16p11', '22q11', 'deletions', 'syndrome', 'region', 'microdeletion', 'carriers', 'duplications']	['Copy number variants (CNVs) are genetic rearrangements, such as deletions and duplications, which result in a deviation from the normal number of copies of a given gene segment. CNVs are implicated in many neuropsychiatric disorders. Deletions of the human chromosomal region 16p11.2 are one of the most common genetic linkages to autism spectrum disorders (ASD). However, ASD is not the only pres…	deletion - duplication - 16p11 - 22q11 - deletions - syndrome - region - microdeletion - carriers - duplications	1	FALSE
22589452	2013	3	1	Social anxiety mediates the effect of autism spectrum disorder characteristics on hostility in young adults.	-1	-1_asd_autism_children_disorder	['asd', 'autism', 'children', 'disorder', 'social', 'spectrum', 'study', 'disorders', 'autistic', 'individuals']	["Whether parental psychiatric disorders are associated with autism spectrum disorder (ASD) in offspring has remained inconclusive. We examined the associations of parental psychiatric disorders with ASD in offspring. This population-based case-control study used Taiwan's National Health Insurance Research Database to identify a cohort of children born from 2004 to 2017 and their parents. A total…	asd - autism - children - disorder - social - spectrum - study - disorders - autistic - individuals	0.185985	FALSE
22589453	2014	2	19	Prevalence of autism spectrum disorder symptomatology and related behavioural characteristics in individuals with Down syndrome.	-1	-1_asd_autism_children_disorder	['asd', 'autism', 'children', 'disorder', 'social', 'spectrum', 'study', 'disorders', 'autistic', 'individuals']	["Whether parental psychiatric disorders are associated with autism spectrum disorder (ASD) in offspring has remained inconclusive. We examined the associations of parental psychiatric disorders with ASD in offspring. This population-based case-control study used Taiwan's National Health Insurance Research Database to identify a cohort of children born from 2004 to 2017 and their parents. A total…	asd - autism - children - disorder - social - spectrum - study - disorders - autistic - individuals	0.537677	FALSE
22591180	2013	5	17	Emotion regulation in the context of frustration in children with high functioning autism and their typical peers.	116	116_emotion_er_regulation_emotional	['emotion', 'er', 'regulation', 'emotional', 'dysregulation', 'reappraisal', 'edi', 'anxiety', 'strategies', 'maladaptive']	["There has been little research connecting underlying emotion processes (e.g., emotion regulation) to frequent behavior problems in young children with autism spectrum disorder (ASD). This study examined the stability of emotion regulation and its relationship with other aspects of child functioning. Participants included 108 children with ASD, ages 4-7, and their primary caregivers. ASD symptom…	emotion - er - regulation - emotional - dysregulation - reappraisal - edi - anxiety - strategies - maladaptive	1	FALSE
22592952	2013	6	28	Treatments for neurodevelopmental disorders: evidence, advocacy, and the Internet.	-1	-1_asd_autism_children_disorder	['asd', 'autism', 'children', 'disorder', 'social', 'spectrum', 'study', 'disorders', 'autistic', 'individuals']	["Whether parental psychiatric disorders are associated with autism spectrum disorder (ASD) in offspring has remained inconclusive. We examined the associations of parental psychiatric disorders with ASD in offspring. This population-based case-control study used Taiwan's National Health Insurance Research Database to identify a cohort of children born from 2004 to 2017 and their parents. A total…	asd - autism - children - disorder - social - spectrum - study - disorders - autistic - individuals	0.63924	FALSE
22605628	2013	1	29	[Therapeutic update in tuberous sclerosis complex: the role of mTOR pathway inhibitors].	-1	-1_asd_autism_children_disorder	['asd', 'autism', 'children', 'disorder', 'social', 'spectrum', 'study', 'disorders', 'autistic', 'individuals']	["Whether parental psychiatric disorders are associated with autism spectrum disorder (ASD) in offspring has remained inconclusive. We examined the associations of parental psychiatric disorders with ASD in offspring. This population-based case-control study used Taiwan's National Health Insurance Research Database to identify a cohort of children born from 2004 to 2017 and their parents. A total…	asd - autism - children - disorder - social - spectrum - study - disorders - autistic - individuals	0.273114	FALSE
22605633	2013	1	29	[Video electroencephalographic diagnosis of epileptic and non-epileptic paroxysmal episodes in infants and children at the pre-school age].	45	45_epilepsy_seizures_seizure_eeg	['epilepsy', 'seizures', 'seizure', 'eeg', 'epileptic', 'patients', 'epileptiform', 'abnormalities', 'focal', 'onset']	['Epilepsy is common in children with autism spectrum disorder (ASD) but little is known about how seizures impact the autism phenotype. The association between epilepsy and autism symptoms and associated maladaptive behaviors was examined in 2,645 children with ASD, of whom 139 had epilepsy, from the Simons Simplex Collection. Children with ASD and epilepsy had significantly more autism symptoms…	epilepsy - seizures - seizure - eeg - epileptic - patients - epileptiform - abnormalities - focal - onset	1	FALSE
22607127	2013	9	27	Autism and esophageal achalasia in childhood: a possible correlation? Report on three cases.	90	90_gi_gastrointestinal_constipation_incontinence	['gi', 'gastrointestinal', 'constipation', 'incontinence', 'symptoms', 'bowel', 'bladder', 'ibd', 'problems', 'gerd']	['There is no standard approach to measuring GI symptoms in individuals with ASD, despite postulated interactions. The objectives of this study were to (a) describe the range of GI symptom ascertainment approaches in studies of ASD, (b) describe the range of prevalence estimates across studies, and (c) assess associations between ascertainment approach and prevalence estimates. Studies published …	gi - gastrointestinal - constipation - incontinence - symptoms - bowel - bladder - ibd - problems - gerd	1	FALSE
22613035	2013	5	16	Day and nighttime excretion of 6-sulphatoxymelatonin in adolescents and young adults with autistic disorder.	87	87_melatonin_sleep_circadian_insomnia	['melatonin', 'sleep', 'circadian', 'insomnia', 'asmt', 'rhythms', 'clock', 'rhythm', 'disturbances', 'pedprm']	['Melatonin is one of the most used pharmacologic treatments for sleep problems in autism spectrum disorder, though its relationship with circadian and sleep parameters is still not well stablished. A naturalistic study was conducted in children with autism spectrum disorder, previously drug-naÃ¯ve, before and after treatment with immediate-release melatonin. Circadian rhythms and sleep parameter…	melatonin - sleep - circadian - insomnia - asmt - rhythms - clock - rhythm - disturbances - pedprm	1	FALSE
22617343	2013	4	29	Phenotypic spectrum and genotype-phenotype correlations of NRXN1 exon deletions.	16	16_deletion_duplication_16p11_22q11	['deletion', 'duplication', '16p11', '22q11', 'deletions', 'syndrome', 'region', 'microdeletion', 'carriers', 'duplications']	['Copy number variants (CNVs) are genetic rearrangements, such as deletions and duplications, which result in a deviation from the normal number of copies of a given gene segment. CNVs are implicated in many neuropsychiatric disorders. Deletions of the human chromosomal region 16p11.2 are one of the most common genetic linkages to autism spectrum disorders (ASD). However, ASD is not the only pres…	deletion - duplication - 16p11 - 22q11 - deletions - syndrome - region - microdeletion - carriers - duplications	0.092263	FALSE
22617862	2015	6	8	Handwriting in children with ADHD.	-1	-1_asd_autism_children_disorder	['asd', 'autism', 'children', 'disorder', 'social', 'spectrum', 'study', 'disorders', 'autistic', 'individuals']	["Whether parental psychiatric disorders are associated with autism spectrum disorder (ASD) in offspring has remained inconclusive. We examined the associations of parental psychiatric disorders with ASD in offspring. This population-based case-control study used Taiwan's National Health Insurance Research Database to identify a cohort of children born from 2004 to 2017 and their parents. A total…	asd - autism - children - disorder - social - spectrum - study - disorders - autistic - individuals	0.919184	FALSE
22622767	2013	3	19	Sharing heterogeneous data: the national database for autism research.	28	28_classification_brain_fmri_imaging	['classification', 'brain', 'fmri', 'imaging', 'learning', 'graph', 'data', 'proposed', 'abide', 'deep']	['In recent years, the use of advanced magnetic resonance (MR) imaging methods such as functional magnetic resonance imaging (fMRI) and structural magnetic resonance imaging (sMRI) has recorded a great increase in neuropsychiatric disorders. Deep learning is a branch of machine learning that is increasingly being used for applications of medical image analysis such as computer-aided diagnosis. In…	classification - brain - fmri - imaging - learning - graph - data - proposed - abide - deep	0.358573	FALSE
22624856	2013	4	3	The effectiveness of video prompting on teaching aquatic play skills for children with autism.	25	25_physical_pa_activity_exercise	['physical', 'pa', 'activity', 'exercise', 'motor', 'program', 'participation', 'skills', 'sedentary', 'fitness']	["\u2009=\u2009201) of school-aged children and youth with autism spectrum disorder completed measures of parent physical activity support (intentions, behavioural regulation, support behaviour), as well as their child's physical activity behaviour. The results showed that parent's intentions to provide physical activity support were associated with their support behaviour for their child's physi…	physical - pa - activity - exercise - motor - program - participation - skills - sedentary - fitness	0.0132603	FALSE
22628087	2013	1	7	The ADOS calibrated severity score: relationship to phenotypic variables and stability over time.	0	0_diagnostic_screening_dsm_diagnosis	['diagnostic', 'screening', 'dsm', 'diagnosis', 'autism', 'ados', 'chat', 'months', 'developmental', 'specificity']	["The Modified Checklist for Autism in Toddlers (M-CHAT) could be appropriate for universal screening for autism spectrum disorder (ASD) at 18 months and 24 months. Validation studies, however, reported differences in psychometric properties across sample populations. This meta-analysis summarized its accuracy measures and quantified their change in relation to patient and study characteristics.F…	diagnostic - screening - dsm - diagnosis - autism - ados - chat - months - developmental - specificity	0.182254	FALSE
22638967	2013	6	28	Perception of talker age by young adults with high-functioning autism.	1	1_language_children_speech_expressive	['language', 'children', 'speech', 'expressive', 'verbal', 'vocabulary', 'pragmatic', 'words', 'word', 'communication']	['Both small-scale and epidemiological longitudinal studies of early language delay indicate that most late talkers attain language scores in the average range by age 5, 6, or 7. However, late talker groups typically obtain significantly lower scores than groups with typical language histories on most language measures into adolescence. These findings support a dimensional account of language del…	language - children - speech - expressive - verbal - vocabulary - pragmatic - words - word - communication	0.225927	FALSE
22640177	2013	1	28	Stressful life events and daily stressors affect awakening cortisol level in midlife mothers of individuals with autism spectrum disorders.	-1	-1_asd_autism_children_disorder	['asd', 'autism', 'children', 'disorder', 'social', 'spectrum', 'study', 'disorders', 'autistic', 'individuals']	["Whether parental psychiatric disorders are associated with autism spectrum disorder (ASD) in offspring has remained inconclusive. We examined the associations of parental psychiatric disorders with ASD in offspring. This population-based case-control study used Taiwan's National Health Insurance Research Database to identify a cohort of children born from 2004 to 2017 and their parents. A total…	asd - autism - children - disorder - social - spectrum - study - disorders - autistic - individuals	0.342614	FALSE
22643885	2013	2	11	Traits of ADHD and autism in girls with a twin brother: a Mendelian randomization study.	13	13_sex_testosterone_twin_pcos	['sex', 'testosterone', 'twin', 'pcos', 'twins', 'males', 'females', 'traits', 'male', 'genetic']	['Females might possess protective mechanisms regarding autism spectrum disorder (ASD) and require a higher detrimental load, including structural brain alterations, before developing clinically relevant levels of autistic traits. This study examines sex differences in structural brain morphology in autism and autistic traits using a within-twin pair approach. Twin design inherently controls for …	sex - testosterone - twin - pcos - twins - males - females - traits - male - genetic	0.392893	TRUE
22644617	2013	6	28	Brief report: pointing cues facilitate word learning in children with autism spectrum disorder.	-1	-1_asd_autism_children_disorder	['asd', 'autism', 'children', 'disorder', 'social', 'spectrum', 'study', 'disorders', 'autistic', 'individuals']	["Whether parental psychiatric disorders are associated with autism spectrum disorder (ASD) in offspring has remained inconclusive. We examined the associations of parental psychiatric disorders with ASD in offspring. This population-based case-control study used Taiwan's National Health Insurance Research Database to identify a cohort of children born from 2004 to 2017 and their parents. A total…	asd - autism - children - disorder - social - spectrum - study - disorders - autistic - individuals	0.625916	FALSE
22644965	2014	1	16	Pupil and salivary indicators of autonomic dysfunction in autism spectrum disorder.	-1	-1_asd_autism_children_disorder	['asd', 'autism', 'children', 'disorder', 'social', 'spectrum', 'study', 'disorders', 'autistic', 'individuals']	["Whether parental psychiatric disorders are associated with autism spectrum disorder (ASD) in offspring has remained inconclusive. We examined the associations of parental psychiatric disorders with ASD in offspring. This population-based case-control study used Taiwan's National Health Insurance Research Database to identify a cohort of children born from 2004 to 2017 and their parents. A total…	asd - autism - children - disorder - social - spectrum - study - disorders - autistic - individuals	0.835134	FALSE
22652240	2013	10	30	Atypical category processing and hemispheric asymmetries in high-functioning children with autism: revealed through high-density EEG mapping.	-1	-1_asd_autism_children_disorder	['asd', 'autism', 'children', 'disorder', 'social', 'spectrum', 'study', 'disorders', 'autistic', 'individuals']	["Whether parental psychiatric disorders are associated with autism spectrum disorder (ASD) in offspring has remained inconclusive. We examined the associations of parental psychiatric disorders with ASD in offspring. This population-based case-control study used Taiwan's National Health Insurance Research Database to identify a cohort of children born from 2004 to 2017 and their parents. A total…	asd - autism - children - disorder - social - spectrum - study - disorders - autistic - individuals	0.641586	FALSE
22653549	2013	6	28	Communication and social deficits in relatives of individuals with SLI and relatives of individuals with ASD.	-1	-1_asd_autism_children_disorder	['asd', 'autism', 'children', 'disorder', 'social', 'spectrum', 'study', 'disorders', 'autistic', 'individuals']	["Whether parental psychiatric disorders are associated with autism spectrum disorder (ASD) in offspring has remained inconclusive. We examined the associations of parental psychiatric disorders with ASD in offspring. This population-based case-control study used Taiwan's National Health Insurance Research Database to identify a cohort of children born from 2004 to 2017 and their parents. A total…	asd - autism - children - disorder - social - spectrum - study - disorders - autistic - individuals	0.784099	FALSE
22657747	2013	5	21	Developmental exposure to mercury chloride does not impair social behavior of C57BL/6 Ã— BTBR F(1) mice.	44	44_mercury_metals_zinc_hair	['mercury', 'metals', 'zinc', 'hair', 'pb', 'elements', 'trace', 'hg', 'levels', 'toxic']	["Since genetic factors alone cannot explain most cases of Autism, the environmental factors are worth investigating as they play an essential role in the development of some cases of Autism. This research is a review paper that aims to clarify the role of the macro elements (MEs), Trace elements (TEs) and ultra-trace elements (UTEs) on human health if they are greater or less than the normal ran…	mercury - metals - zinc - hair - pb - elements - trace - hg - levels - toxic	0.0590005	FALSE
22664040	2013	4	22	PTEN signaling in autism spectrum disorders.	120	120_pten_phts_macrocephaly_mutations	['pten', 'phts', 'macrocephaly', 'mutations', 'hamartoma', 'tumor', 'germline', 'cancer', 'mutation', 'phosphatase']	['Germline mutations in PTEN, the gene that encodes phosphatase and tensin homolog, have been identified in up to 20% of children with autism spectrum disorder (ASD) and macrocephaly and are associated with marked abnormalities in the white matter of the brain. This study sought to characterize the neurobehavioral phenotype of PTEN-ASD. Comprehensive neurobehavioral evaluations were conducted in …	pten - phts - macrocephaly - mutations - hamartoma - tumor - germline - cancer - mutation - phosphatase	0.551885	FALSE
22669539	2013	6	28	Predictive value of morphological features in patients with autism versus normal controls.	28	28_classification_brain_fmri_imaging	['classification', 'brain', 'fmri', 'imaging', 'learning', 'graph', 'data', 'proposed', 'abide', 'deep']	['In recent years, the use of advanced magnetic resonance (MR) imaging methods such as functional magnetic resonance imaging (fMRI) and structural magnetic resonance imaging (sMRI) has recorded a great increase in neuropsychiatric disorders. Deep learning is a branch of machine learning that is increasingly being used for applications of medical image analysis such as computer-aided diagnosis. In…	classification - brain - fmri - imaging - learning - graph - data - proposed - abide - deep	0.0888857	FALSE
22673860	2013	6	28	Autism severity and qualities of parent-child relations.	4	4_parenting_stress_mothers_parents	['parenting', 'stress', 'mothers', 'parents', 'coping', 'child', 'fathers', 'family', 'parental', 'support']	['The aim of the study was to investigate the perception of the family functioning in parents of children with autism spectrum disorders (ASD) with normal-range intelligence and the relationships between family functioning, parenting stress and quality of life. Dyads of parents of children with ASD without intellectual disability and parents of typically developing children (controls) completed a…	parenting - stress - mothers - parents - coping - child - fathers - family - parental - support	0.0687024	FALSE
22674640	2013	1	7	Digit ratio 2D:4D in relation to autism spectrum disorders, empathizing, and systemizing: a quantitative review.	13	13_sex_testosterone_twin_pcos	['sex', 'testosterone', 'twin', 'pcos', 'twins', 'males', 'females', 'traits', 'male', 'genetic']	['Females might possess protective mechanisms regarding autism spectrum disorder (ASD) and require a higher detrimental load, including structural brain alterations, before developing clinically relevant levels of autistic traits. This study examines sex differences in structural brain morphology in autism and autistic traits using a within-twin pair approach. Twin design inherently controls for …	sex - testosterone - twin - pcos - twins - males - females - traits - male - genetic	0.253466	FALSE
22674669	2013	1	7	Same but different: 9-month-old infants at average and high risk for autism look at the same facial features but process them using different brain mechanisms.	3	3_gaze_eye_attention_tracking	['gaze', 'eye', 'attention', 'tracking', 'visual', 'social', 'faces', 'stimuli', 'face', 'looking']	["Eye-gaze methods offer numerous advantages for studying cognitive processes in children with autism spectrum disorder (ASD), but data loss may threaten the validity and generalizability of results. Some eye-gaze systems may be more vulnerable to data loss than others, but to our knowledge, this issue has not been empirically investigated. In the current study, we asked whether automatic eye-tra…	gaze - eye - attention - tracking - visual - social - faces - stimuli - face - looking	0.218224	FALSE
22674695	2013	1	7	Changes in the sulcal size associated with autism spectrum disorder revealed by sulcal morphometry.	19	19_volume_cortical_brain_matter	['volume', 'cortical', 'brain', 'matter', 'thickness', 'gray', 'gm', 'structural', 'volumes', 'surface']	['Results on grey matter (GM) structural alterations in autism spectrum disorder (ASD) are inconclusive. Moreover, little is known about age effects on brain-structure abnormalities in ASD beyond childhood. Here, we aimed to examine regional GM volumes in a large sample of children, adolescents, and adults with ASD. Magnetic resonance imaging scans were obtained in 47 male ASD subjects and 51 mat…	volume - cortical - brain - matter - thickness - gray - gm - structural - volumes - surface	1	FALSE
22676294	2014	4	1	On the differential nature of induced and incidental echolalia in autism.	1	1_language_children_speech_expressive	['language', 'children', 'speech', 'expressive', 'verbal', 'vocabulary', 'pragmatic', 'words', 'word', 'communication']	['Both small-scale and epidemiological longitudinal studies of early language delay indicate that most late talkers attain language scores in the average range by age 5, 6, or 7. However, late talker groups typically obtain significantly lower scores than groups with typical language histories on most language measures into adolescence. These findings support a dimensional account of language del…	language - children - speech - expressive - verbal - vocabulary - pragmatic - words - word - communication	0.121238	FALSE
22676327	2014	1	16	Influence of colour on acquisition and generalisation of graphic symbols.	-1	-1_asd_autism_children_disorder	['asd', 'autism', 'children', 'disorder', 'social', 'spectrum', 'study', 'disorders', 'autistic', 'individuals']	["Whether parental psychiatric disorders are associated with autism spectrum disorder (ASD) in offspring has remained inconclusive. We examined the associations of parental psychiatric disorders with ASD in offspring. This population-based case-control study used Taiwan's National Health Insurance Research Database to identify a cohort of children born from 2004 to 2017 and their parents. A total…	asd - autism - children - disorder - social - spectrum - study - disorders - autistic - individuals	0.610161	FALSE
22677565	2013	1	10	Risk of autism spectrum disorders in low birth weight and small for gestational age infants.	5	5_birth_risk_born_95	['birth', 'risk', 'born', '95', 'ci', 'preterm', 'maternal', 'perinatal', 'age', 'factors']	['We sought to estimate the prevalence of autism spectrum disorder (ASD) in children born extremely preterm relative to the U.S. population risk of 1.5% [CDC, 2014] using the best-available diagnostic procedures and minimizing confounding with other neurodevelopmental impairments. Eight hundred and eighty nine of 966 (92%) 10-year-old children from the Extremely Low Gestational Age Newborn birth …	birth - risk - born - 95 - ci - preterm - maternal - perinatal - age - factors	1	FALSE
22678458	2013	2	15	Treatment for co-occurring attention deficit/hyperactivity disorder and autism spectrum disorder.	12	12_adhd_hyperactivity_symptoms_deficit	['adhd', 'hyperactivity', 'symptoms', 'deficit', 'attention', 'comorbid', 'asd', 'disorder', 'ef', 'problems']	["This study examined the prevalence of autism spectrum disorder (ASD) symptoms in a community-based sample of children with attention-deficit/hyperactivity disorder (ADHD) and non-ADHD controls. We also examined the relationship between ASD symptoms and ADHD subtype, ADHD symptom severity and child gender. Participants were 6-10-year-old children (164 ADHD; 198 non-ADHD control) attending 43 sch…	adhd - hyperactivity - symptoms - deficit - attention - comorbid - asd - disorder - ef - problems	0.287754	FALSE
22684525	2013	6	28	Eye-tracking, autonomic, and electrophysiological correlates of emotional face processing in adolescents with autism spectrum disorder.	29	29_emotion_facial_expressions_recognition	['emotion', 'facial', 'expressions', 'recognition', 'emotions', 'emotional', 'face', 'faces', 'happy', 'angry']	["Facial mimicry as well as the accurate assessment of one's performance when judging others' emotional expressions have been suggested to inform successful emotion recognition. Differences in the integration of these two information sources might explain alterations in the perception of others' emotions in individuals with Social Anxiety Disorder and individuals on the autism spectrum. Using a n…	emotion - facial - expressions - recognition - emotions - emotional - face - faces - happy - angry	0.131045	FALSE
22686868	2013	2	11	Qualitatively distinct factors contribute to elevated rates of paranoia in autism and schizophrenia.	62	62_schizophrenia_psychosis_schizotypal_psychotic	['schizophrenia', 'psychosis', 'schizotypal', 'psychotic', 'traits', 'schizotypy', 'symptoms', 'disorders', 'sads', 'autistic']	['Autism spectrum and schizophrenia spectrum disorders are classified separately in the DSM-5, yet research indicates that these two disorders share overlapping features. The aim of the present study was to examine the overlap between autistic and schizotypal personality traits and whether anxiety and depression act as confounding variables in this relationship within a non-clinical population. O…	schizophrenia - psychosis - schizotypal - psychotic - traits - schizotypy - symptoms - disorders - sads - autistic	1	FALSE
22686870	2013	11	18	Prodromal and autistic symptoms in schizotypal personality disorder and 22q11.2 deletion syndrome.	-1	-1_asd_autism_children_disorder	['asd', 'autism', 'children', 'disorder', 'social', 'spectrum', 'study', 'disorders', 'autistic', 'individuals']	["Whether parental psychiatric disorders are associated with autism spectrum disorder (ASD) in offspring has remained inconclusive. We examined the associations of parental psychiatric disorders with ASD in offspring. This population-based case-control study used Taiwan's National Health Insurance Research Database to identify a cohort of children born from 2004 to 2017 and their parents. A total…	asd - autism - children - disorder - social - spectrum - study - disorders - autistic - individuals	0.699964	FALSE
22688680	2013	2	27	Early childhood assessments of community pediatric professionals predict autism spectrum and attention deficit hyperactivity problems.	12	12_adhd_hyperactivity_symptoms_deficit	['adhd', 'hyperactivity', 'symptoms', 'deficit', 'attention', 'comorbid', 'asd', 'disorder', 'ef', 'problems']	["This study examined the prevalence of autism spectrum disorder (ASD) symptoms in a community-based sample of children with attention-deficit/hyperactivity disorder (ADHD) and non-ADHD controls. We also examined the relationship between ASD symptoms and ADHD subtype, ADHD symptom severity and child gender. Participants were 6-10-year-old children (164 ADHD; 198 non-ADHD control) attending 43 sch…	adhd - hyperactivity - symptoms - deficit - attention - comorbid - asd - disorder - ef - problems	1	FALSE
22688777	2013	6	28	Brief report: compliance and noncompliance to parental control strategies in children with high-functioning autism and their typical peers.	-1	-1_asd_autism_children_disorder	['asd', 'autism', 'children', 'disorder', 'social', 'spectrum', 'study', 'disorders', 'autistic', 'individuals']	["Whether parental psychiatric disorders are associated with autism spectrum disorder (ASD) in offspring has remained inconclusive. We examined the associations of parental psychiatric disorders with ASD in offspring. This population-based case-control study used Taiwan's National Health Insurance Research Database to identify a cohort of children born from 2004 to 2017 and their parents. A total…	asd - autism - children - disorder - social - spectrum - study - disorders - autistic - individuals	0.780511	FALSE
22689217	2014	6	18	Selective impairment of cognitive empathy for moral judgment in adults with high functioning autism.	-1	-1_asd_autism_children_disorder	['asd', 'autism', 'children', 'disorder', 'social', 'spectrum', 'study', 'disorders', 'autistic', 'individuals']	["Whether parental psychiatric disorders are associated with autism spectrum disorder (ASD) in offspring has remained inconclusive. We examined the associations of parental psychiatric disorders with ASD in offspring. This population-based case-control study used Taiwan's National Health Insurance Research Database to identify a cohort of children born from 2004 to 2017 and their parents. A total…	asd - autism - children - disorder - social - spectrum - study - disorders - autistic - individuals	0.421425	FALSE
22689534	2013	1	7	Haploinsufficiency of CMIP in a girl with autism spectrum disorder and developmental delay due to a de novo deletion on chromosome 16q23.2.	15	15_genes_variants_mutations_novo	['genes', 'variants', 'mutations', 'novo', 'sequencing', 'gene', 'genetic', 'genome', 'rare', 'exome']	['Autism spectrum disorder (ASD) is a neurodevelopmental disorder with a strong genetic component. Recently developed genomic technologies, including microarray and next-generation sequencing (NGS), have enabled researchers to genetic analyses aimed at identifying genetic variations associated with ASD and to elucidate the genetic architecture of the disorder. Large-scale microarray, exome sequen…	genes - variants - mutations - novo - sequencing - gene - genetic - genome - rare - exome	0.329133	FALSE
22689649	2014	4	9	Long-term temporal stability of measured inattention and impulsivity in typical and referred children.	12	12_adhd_hyperactivity_symptoms_deficit	['adhd', 'hyperactivity', 'symptoms', 'deficit', 'attention', 'comorbid', 'asd', 'disorder', 'ef', 'problems']	["This study examined the prevalence of autism spectrum disorder (ASD) symptoms in a community-based sample of children with attention-deficit/hyperactivity disorder (ADHD) and non-ADHD controls. We also examined the relationship between ASD symptoms and ADHD subtype, ADHD symptom severity and child gender. Participants were 6-10-year-old children (164 ADHD; 198 non-ADHD control) attending 43 sch…	adhd - hyperactivity - symptoms - deficit - attention - comorbid - asd - disorder - ef - problems	0.579108	FALSE
22689755	2013	1	31	DELISHUS: an efficient and exact algorithm for genome-wide detection of deletion polymorphism in autism.	15	15_genes_variants_mutations_novo	['genes', 'variants', 'mutations', 'novo', 'sequencing', 'gene', 'genetic', 'genome', 'rare', 'exome']	['Autism spectrum disorder (ASD) is a neurodevelopmental disorder with a strong genetic component. Recently developed genomic technologies, including microarray and next-generation sequencing (NGS), have enabled researchers to genetic analyses aimed at identifying genetic variations associated with ASD and to elucidate the genetic architecture of the disorder. Large-scale microarray, exome sequen…	genes - variants - mutations - novo - sequencing - gene - genetic - genome - rare - exome	0.541014	FALSE
22693142	2013	4	9	Defining genetically meaningful language and personality traits in relatives of individuals with fragile X syndrome and relatives of individuals with autism.	59	59_fxs_fragile_syndrome_boys	['fxs', 'fragile', 'syndrome', 'boys', 'premutation', 'males', 'anxiety', 'fmr1', 'social', 'language']	['Fragile X syndrome (FXS) is the most common known genetic cause of autism spectrum disorder (ASD). Although 50-75\u2009% of children with FXS meet ASD criteria, no studies have compared ASD symptoms in infants with FXS versus other high risk groups, such as siblings of children with ASD (ASIBs). Using the Autism Observation Scale for Infants, our findings indicate that 53\u2009% of 12-month inf…	fxs - fragile - syndrome - boys - premutation - males - anxiety - fmr1 - social - language	0.396788	FALSE
22695064	2013	2	27	Concerns and considerations among caregivers of a child with autism in Qatar.	7	7_parents_services_care_families	['parents', 'services', 'care', 'families', 'service', 'child', 'needs', 'experiences', 'latino', 'family']	["Autism spectrum disorders (ASD) significantly impact lives of affected individuals and their families. They confront daunting challenges and multiple demands in their daily life, when compared to parents of children with other disabilities or parents of typically developing children.Participants completed The Caregiver Needs Survey, the survey intended for parents or primary caregivers of child…	parents - services - care - families - service - child - needs - experiences - latino - family	0.0468541	FALSE
22695072	2013	3	29	Preference for blocking or response redirection during stereotypy treatment.	20	20_reinforcement_problem_stereotypy_reinforcer	['reinforcement', 'problem', 'stereotypy', 'reinforcer', 'behavior', 'preference', 'fct', 'rird', 'extinction', 'responding']	["This study examined behavioral persistence during extinction following continuous or intermittent reinforcement in the context of an analogue functional analysis of problem behavior. Participants were 4 children who had been diagnosed with an autism spectrum disorder and who engaged in problem behavior maintained by social reinforcement. Experimental sessions included 4 successive 5-min compone…	reinforcement - problem - stereotypy - reinforcer - behavior - preference - fct - rird - extinction - responding	0.201861	FALSE
22696195	2013	6	28	Autism spectrum disorder reclassified: a second look at the 1980s Utah/UCLA Autism Epidemiologic Study.	23	23_prevalence_surveillance_addm_years	['prevalence', 'surveillance', 'addm', 'years', 'incidence', 'aged', 'diagnosis', '000', 'children', 'hispanic']	["Autism spectrum disorder (ASD).2010.The Autism and Developmental Disabilities Monitoring (ADDM) Network is an active surveillance system in the United States that provides estimates of the prevalence of ASD and other characteristics among children aged 8 years whose parents or guardians live in 11 ADDM sites in the United States. ADDM surveillance is conducted in two phases. The first phase con…	prevalence - surveillance - addm - years - incidence - aged - diagnosis - 000 - children - hispanic	0.121244	FALSE
22696196	2013	7	19	Getting a grip on social gaze: control over others' gaze helps gaze detection in high-functioning autism.	3	3_gaze_eye_attention_tracking	['gaze', 'eye', 'attention', 'tracking', 'visual', 'social', 'faces', 'stimuli', 'face', 'looking']	["Eye-gaze methods offer numerous advantages for studying cognitive processes in children with autism spectrum disorder (ASD), but data loss may threaten the validity and generalizability of results. Some eye-gaze systems may be more vulnerable to data loss than others, but to our knowledge, this issue has not been empirically investigated. In the current study, we asked whether automatic eye-tra…	gaze - eye - attention - tracking - visual - social - faces - stimuli - face - looking	0.409787	FALSE
22696626	2013	9	6	Effect of whole body vibration on stereotypy of young children with autism.	32	32_motor_walking_gait_coordination	['motor', 'walking', 'gait', 'coordination', 'dcd', 'gross', 'skills', 'movement', 'toe', 'stereotypies']	['Delays within the motor domain are often overlooked as an early surveillance marker for autism. The present study evaluated motor difficulties and its potential as an early predictive marker for later autism likelihood in a cohort of infants (N\xa0=\xa096) showing early behavioral signs of autism aged 9-14\u2009months. The motor domain was evaluated using the motor subscales of the Mullen Scale…	motor - walking - gait - coordination - dcd - gross - skills - movement - toe - stereotypies	0.257233	FALSE
22699139	2013	1	23	Self-reported and parent-reported pain for common painful events in high-functioning children and adolescents with autism spectrum disorder.	-1	-1_asd_autism_children_disorder	['asd', 'autism', 'children', 'disorder', 'social', 'spectrum', 'study', 'disorders', 'autistic', 'individuals']	["Whether parental psychiatric disorders are associated with autism spectrum disorder (ASD) in offspring has remained inconclusive. We examined the associations of parental psychiatric disorders with ASD in offspring. This population-based case-control study used Taiwan's National Health Insurance Research Database to identify a cohort of children born from 2004 to 2017 and their parents. A total…	asd - autism - children - disorder - social - spectrum - study - disorders - autistic - individuals	0.85275	FALSE
22699247	2013	3	29	Predicting mental health among mothers of school-aged children with developmental disabilities: the relative contribution of child, maternal and environmental factors.	4	4_parenting_stress_mothers_parents	['parenting', 'stress', 'mothers', 'parents', 'coping', 'child', 'fathers', 'family', 'parental', 'support']	['The aim of the study was to investigate the perception of the family functioning in parents of children with autism spectrum disorders (ASD) with normal-range intelligence and the relationships between family functioning, parenting stress and quality of life. Dyads of parents of children with ASD without intellectual disability and parents of typically developing children (controls) completed a…	parenting - stress - mothers - parents - coping - child - fathers - family - parental - support	1	FALSE
22700988	2014	4	3	White matter and development in children with an autism spectrum disorder.	48	48_matter_white_diffusion_tracts	['matter', 'white', 'diffusion', 'tracts', 'diffusivity', 'fa', 'anisotropy', 'tract', 'fractional', 'dti']	['Abnormal functional connections are associated with impaired white matter tract integrity in the brain. Diffusion tensor imaging (DTI) is a promising method for evaluating white matter integrity in infants and young children. This work aims to shed light on the location and nature of the decrease in white matter integrity.Here, the results of 19 studies have been presented that investigated whi…	matter - white - diffusion - tracts - diffusivity - fa - anisotropy - tract - fractional - dti	1	FALSE
22705413	2013	7	10	CACNA1C (Cav1.2) in the pathophysiology of psychiatric disease.	-1	-1_asd_autism_children_disorder	['asd', 'autism', 'children', 'disorder', 'social', 'spectrum', 'study', 'disorders', 'autistic', 'individuals']	["Whether parental psychiatric disorders are associated with autism spectrum disorder (ASD) in offspring has remained inconclusive. We examined the associations of parental psychiatric disorders with ASD in offspring. This population-based case-control study used Taiwan's National Health Insurance Research Database to identify a cohort of children born from 2004 to 2017 and their parents. A total…	asd - autism - children - disorder - social - spectrum - study - disorders - autistic - individuals	0.42051	FALSE
22705454	2013	3	29	Cost comparison of early intensive behavioral intervention and treatment as usual for children with autism spectrum disorder in The Netherlands.	34	34_costs_medicaid_care_cost	['costs', 'medicaid', 'care', 'cost', 'ed', 'services', 'health', 'utilization', 'emergency', 'spending']	['Individuals with intellectual and/or developmental disabilities (IDD) tend to incur high health care costs. The Neurobehavior HOME Program (HOME) is an interdisciplinary program that cares for this population. This study will evaluate the health care costs and utilization of individuals during their first year of enrollment in HOME and identify factors associated with higher cost and utilizatio…	costs - medicaid - care - cost - ed - services - health - utilization - emergency - spending	1	FALSE
22712574	2013	3	14	Parent-implemented picture exchange communication system (PECS) training: an analysis of YouTube videos.	115	115_play_pretend_intervention_peer	['play', 'pretend', 'intervention', 'peer', 'peers', 'skills', 'communication', 'children', 'parental', 'parents']	["Although the literature on parent-child interactions in young children with autism has examined dyadic style, synchrony, and sustained engagement, the examination of parental skill in sustaining and developing play skills themselves has not been targeted. This study examined the extent to which parents of young children with autism match and scaffold their child's play. Sixteen dyads of parents…	play - pretend - intervention - peer - peers - skills - communication - children - parental - parents	1	FALSE
22712808	2014	11	21	Diagnosing autistic spectrum disorder in the age of austerity.	63	63_screening_referral_knowledge_pharmacists	['screening', 'referral', 'knowledge', 'pharmacists', 'care', 'diagnostic', 'referrals', 'diagnosis', 'training', 'practices']	['Autism spectrum disorder (ASD) screening completion rates are often low despite their validity and influence on earlier intervention and positive treatment outcomes. This study sought to examine the use of one ASD screening tool, the Modified Checklist for Autism in Toddlers-Revised (MCHAT-R), in a racially and ethnically diverse urban pediatric clinic to review potential disparities within scr…	screening - referral - knowledge - pharmacists - care - diagnostic - referrals - diagnosis - training - practices	0.175779	FALSE
22713374	2013	2	20	Sylvian fissure and parietal anatomy in children with autism spectrum disorder.	-1	-1_asd_autism_children_disorder	['asd', 'autism', 'children', 'disorder', 'social', 'spectrum', 'study', 'disorders', 'autistic', 'individuals']	["Whether parental psychiatric disorders are associated with autism spectrum disorder (ASD) in offspring has remained inconclusive. We examined the associations of parental psychiatric disorders with ASD in offspring. This population-based case-control study used Taiwan's National Health Insurance Research Database to identify a cohort of children born from 2004 to 2017 and their parents. A total…	asd - autism - children - disorder - social - spectrum - study - disorders - autistic - individuals	0.68064	FALSE
22717029	2013	4	23	Levels of soluble platelet endothelial cell adhesion molecule-1 and P-selectin are decreased in children with autism spectrum disorder.	49	49_il_immune_cytokine_cytokines	['il', 'immune', 'cytokine', 'cytokines', 'inflammatory', 'levels', 'cells', 'interleukin', '1Î²', 'serum']	['B cells play multiple roles in preservation of healthy immune system including management of immune responses by expression of pro- and anti-inflammatory cytokines. Several earlier studies have documented that B cells express both pro-inflammatory cytokines such as IL-6, TNF-Î± as well as anti-inflammatory cytokines such as IL-10. However, it is yet to be examined whether these pro-/anti-inflam…	il - immune - cytokine - cytokines - inflammatory - levels - cells - interleukin - 1Î² - serum	0.0806366	FALSE
22717189	2013	1	14	Does microglial dysfunction play a role in autism and Rett syndrome?	-1	-1_asd_autism_children_disorder	['asd', 'autism', 'children', 'disorder', 'social', 'spectrum', 'study', 'disorders', 'autistic', 'individuals']	["Whether parental psychiatric disorders are associated with autism spectrum disorder (ASD) in offspring has remained inconclusive. We examined the associations of parental psychiatric disorders with ASD in offspring. This population-based case-control study used Taiwan's National Health Insurance Research Database to identify a cohort of children born from 2004 to 2017 and their parents. A total…	asd - autism - children - disorder - social - spectrum - study - disorders - autistic - individuals	0.745071	FALSE
22722980	2013	2	27	The discovery of autism: Indian parents' experiences of caring for their child with an autism spectrum disorder.	7	7_parents_services_care_families	['parents', 'services', 'care', 'families', 'service', 'child', 'needs', 'experiences', 'latino', 'family']	["Autism spectrum disorders (ASD) significantly impact lives of affected individuals and their families. They confront daunting challenges and multiple demands in their daily life, when compared to parents of children with other disabilities or parents of typically developing children.Participants completed The Caregiver Needs Survey, the survey intended for parents or primary caregivers of child…	parents - services - care - families - service - child - needs - experiences - latino - family	1	FALSE
22723127	2013	7	19	Motor abilities in autism: a review using a computational context.	32	32_motor_walking_gait_coordination	['motor', 'walking', 'gait', 'coordination', 'dcd', 'gross', 'skills', 'movement', 'toe', 'stereotypies']	['Delays within the motor domain are often overlooked as an early surveillance marker for autism. The present study evaluated motor difficulties and its potential as an early predictive marker for later autism likelihood in a cohort of infants (N\xa0=\xa096) showing early behavioral signs of autism aged 9-14\u2009months. The motor domain was evaluated using the motor subscales of the Mullen Scale…	motor - walking - gait - coordination - dcd - gross - skills - movement - toe - stereotypies	0.0653994	FALSE
22727823	2013	9	9	GABAergic activity in autism spectrum disorders: an investigation of cortical inhibition via transcranial magnetic stimulation.	67	67_gaba_glutamate_cr_mrs	['gaba', 'glutamate', 'cr', 'mrs', 'glx', 'spectroscopy', 'naa', 'levels', 'cortex', 'acc']	['Imbalanced levels of excitation and inhibition (E/I) have been proposed to account for various behavioral and electrophysiological phenotypes in autism. Although proton magnetic resonance spectroscopy ((1)H-MRS) studies have been published on various metabolite levels in autism, including glutamate, the major excitatory neurotransmitter, few (1)H-MRS studies have yet been conducted the major in…	gaba - glutamate - cr - mrs - glx - spectroscopy - naa - levels - cortex - acc	1	FALSE
22728603	2013	3	29	Psychometric validation and normative data of a second Chinese version of the Hooper Visual Organization Test in children.	0	0_diagnostic_screening_dsm_diagnosis	['diagnostic', 'screening', 'dsm', 'diagnosis', 'autism', 'ados', 'chat', 'months', 'developmental', 'specificity']	["The Modified Checklist for Autism in Toddlers (M-CHAT) could be appropriate for universal screening for autism spectrum disorder (ASD) at 18 months and 24 months. Validation studies, however, reported differences in psychometric properties across sample populations. This meta-analysis summarized its accuracy measures and quantified their change in relation to patient and study characteristics.F…	diagnostic - screening - dsm - diagnosis - autism - ados - chat - months - developmental - specificity	0.116976	FALSE
22729383	2013	7	19	Individuals with Asperger's disorder exhibit difficulty in switching attention from a local level to a global level.	10	10_memory_visual_processing_perceptual	['memory', 'visual', 'processing', 'perceptual', 'task', 'motion', 'perception', 'local', 'tasks', 'global']	['What does an individual with autism spectrum disorder (ASD) perceive first: the forest or the trees? In spite of 30 years of research and influential theories like the weak central coherence (WCC) theory and the enhanced perceptual functioning (EPF) account, the interplay of local and global visual processing in ASD remains only partly understood. Research findings vary in indicating a local pr…	memory - visual - processing - perceptual - task - motion - perception - local - tasks - global	0.782454	FALSE
22730494	2013	3	14	RBFOX1 regulates both splicing and transcriptional networks in human neuronal development.	2	2_synaptic_genes_mice_protein	['synaptic', 'genes', 'mice', 'protein', 'mouse', 'gene', 'mutations', 'cell', 'proteins', 'expression']	['Recent advances in human genetics identified genetic variants involved in causing autism spectrum disorders (ASDs). Mouse models that mimic mutations found in patients with ASD exhibit behavioral phenotypes consistent with ASD symptoms. These mouse models suggest critical biological factors of ASD etiology. Another important implication of ASD genetics is the enrichment of ASD risk genes in mol…	synaptic - genes - mice - protein - mouse - gene - mutations - cell - proteins - expression	0.238752	FALSE
22733215	2013	2	18	Inherited calcium channelopathies in the pathophysiology of arrhythmias.	38	38_mirnas_mir_mirna_expression	['mirnas', 'mir', 'mirna', 'expression', 'rna', 'genes', 'micrornas', 'gene', 'cell', 'cells']	['Development of biomarkers for autism spectrum disorder (ASD) has still remained a challenge to date. Recently, alterations of the expression of microRNAs (miRNAs) in peripheral blood, serum and post-mortem brain tissue have been linked to ASD. miRNAs are known to be secreted by various cell types and can mediate transmission of information into recipient cells and to modulate their physiologica…	mirnas - mir - mirna - expression - rna - genes - micrornas - gene - cell - cells	0.0841113	FALSE
22733297	2013	7	19	Autism spectrum traits in children with anxiety disorders.	30	30_anxiety_symptoms_social_parent	['anxiety', 'symptoms', 'social', 'parent', 'youth', 'sad', 'children', 'asd', 'uncertainty', 'iu']	['Children with Autism Spectrum Disorder are vulnerable to anxiety. Repetitive behaviours are a core feature of Autism Spectrum Disorder (ASD) and have been associated anxiety. This study examined repetitive behaviours and anxiety in two groups of children with autism spectrum disorder, those with high anxiety and those with lower levels of anxiety. Children with high anxiety had more repetitive …	anxiety - symptoms - social - parent - youth - sad - children - asd - uncertainty - iu	1	FALSE
22733298	2013	7	19	Non-word repetition impairment in autism and specific language impairment: evidence for distinct underlying cognitive causes.	1	1_language_children_speech_expressive	['language', 'children', 'speech', 'expressive', 'verbal', 'vocabulary', 'pragmatic', 'words', 'word', 'communication']	['Both small-scale and epidemiological longitudinal studies of early language delay indicate that most late talkers attain language scores in the average range by age 5, 6, or 7. However, late talker groups typically obtain significantly lower scores than groups with typical language histories on most language measures into adolescence. These findings support a dimensional account of language del…	language - children - speech - expressive - verbal - vocabulary - pragmatic - words - word - communication	0.349007	FALSE
22733299	2013	8	15	Social anxiety in parents of high-functioning children with autism and Asperger syndrome.	30	30_anxiety_symptoms_social_parent	['anxiety', 'symptoms', 'social', 'parent', 'youth', 'sad', 'children', 'asd', 'uncertainty', 'iu']	['Children with Autism Spectrum Disorder are vulnerable to anxiety. Repetitive behaviours are a core feature of Autism Spectrum Disorder (ASD) and have been associated anxiety. This study examined repetitive behaviours and anxiety in two groups of children with autism spectrum disorder, those with high anxiety and those with lower levels of anxiety. Children with high anxiety had more repetitive …	anxiety - symptoms - social - parent - youth - sad - children - asd - uncertainty - iu	0.130088	FALSE
22733365	2013	2	4	Arrhythmia-associated cardiac CaÂ²(+) cycling proteins and gene mutations.	24	24_cacna1c_mutation_mutations_timothy	['cacna1c', 'mutation', 'mutations', 'timothy', 'gene', 'syndrome', 'qt', 'variant', 'variants', 'ts']	['Timothy syndrome is characterized by a unique combination of a prolongation of the corrected QT interval of the electrocardiogram and bilateral cutaneous syndactyly of the fingers and the toes and is caused by heterozygous mutations in CACNA1C, a gene encoding a calcium channel. After the discovery of the CACNA1C gene as the causative gene for Timothy syndrome, patients with CACNA1C mutations w…	cacna1c - mutation - mutations - timothy - gene - syndrome - qt - variant - variants - ts	0.0462688	FALSE
22735682	2013	8	27	Early markers of autism spectrum disorders in infants and toddlers prospectively identified in the Social Attention and Communication Study.	0	0_diagnostic_screening_dsm_diagnosis	['diagnostic', 'screening', 'dsm', 'diagnosis', 'autism', 'ados', 'chat', 'months', 'developmental', 'specificity']	["The Modified Checklist for Autism in Toddlers (M-CHAT) could be appropriate for universal screening for autism spectrum disorder (ASD) at 18 months and 24 months. Validation studies, however, reported differences in psychometric properties across sample populations. This meta-analysis summarized its accuracy measures and quantified their change in relation to patient and study characteristics.F…	diagnostic - screening - dsm - diagnosis - autism - ados - chat - months - developmental - specificity	0.139177	FALSE
22735897	2013	7	19	Randomized controlled trial: Multimodal Anxiety and Social Skill Intervention for adolescents with autism spectrum disorder.	83	83_cbt_anxiety_treatment_youth	['cbt', 'anxiety', 'treatment', 'youth', 'therapy', 'cognitive', 'adapted', 'tau', 'post', 'efficacy']	['Previous Cochrane Reviews have shown that cognitive behavioural therapy (CBT) is effective in treating childhood anxiety disorders. However, questions remain regarding the following: up-to-date evidence of the relative efficacy and acceptability of CBT compared to waiting lists/no treatment, treatment as usual, attention controls, and alternative treatments; benefits across a range of outcomes;…	cbt - anxiety - treatment - youth - therapy - cognitive - adapted - tau - post - efficacy	1	FALSE
22736078	2013	1	8	The distinct and overlapping phenotypic spectra of FOXP1 and FOXP2 in cognitive disorders.	-1	-1_asd_autism_children_disorder	['asd', 'autism', 'children', 'disorder', 'social', 'spectrum', 'study', 'disorders', 'autistic', 'individuals']	["Whether parental psychiatric disorders are associated with autism spectrum disorder (ASD) in offspring has remained inconclusive. We examined the associations of parental psychiatric disorders with ASD in offspring. This population-based case-control study used Taiwan's National Health Insurance Research Database to identify a cohort of children born from 2004 to 2017 and their parents. A total…	asd - autism - children - disorder - social - spectrum - study - disorders - autistic - individuals	0.605555	FALSE
22736195	2013	4	15	Development of an internet-based support and coaching model for adolescents and young adults with ADHD and autism spectrum disorders: a pilot study.	-1	-1_asd_autism_children_disorder	['asd', 'autism', 'children', 'disorder', 'social', 'spectrum', 'study', 'disorders', 'autistic', 'individuals']	["Whether parental psychiatric disorders are associated with autism spectrum disorder (ASD) in offspring has remained inconclusive. We examined the associations of parental psychiatric disorders with ASD in offspring. This population-based case-control study used Taiwan's National Health Insurance Research Database to identify a cohort of children born from 2004 to 2017 and their parents. A total…	asd - autism - children - disorder - social - spectrum - study - disorders - autistic - individuals	0.601771	FALSE
22736729	2013	8	22	Otitis and autism spectrum disorders.	0	0_diagnostic_screening_dsm_diagnosis	['diagnostic', 'screening', 'dsm', 'diagnosis', 'autism', 'ados', 'chat', 'months', 'developmental', 'specificity']	["The Modified Checklist for Autism in Toddlers (M-CHAT) could be appropriate for universal screening for autism spectrum disorder (ASD) at 18 months and 24 months. Validation studies, however, reported differences in psychometric properties across sample populations. This meta-analysis summarized its accuracy measures and quantified their change in relation to patient and study characteristics.F…	diagnostic - screening - dsm - diagnosis - autism - ados - chat - months - developmental - specificity	0.88617	FALSE
22738084	2013	1	9	Abnormal modulation of corticospinal excitability in adults with Asperger's syndrome.	101	101_tdcs_stimulation_transcranial_rtms	['tdcs', 'stimulation', 'transcranial', 'rtms', 'tms', 'sham', 'ctbs', 'anodal', 'magnetic', 'itbs']	['Dysfunctional frontal cortical areas associated with clinical features are observed in children with autism spectrum disorder (ASD). This study attempted to identify any potential therapeutic effects of bilateral anodal transcranial direct current stimulation (tDCS) applied over the left and right prefrontal and motor areas on the clinical characteristics of children with ASD. Fifty children wi…	tdcs - stimulation - transcranial - rtms - tms - sham - ctbs - anodal - magnetic - itbs	1	FALSE
22742928	2014	1	27	Using picture schedules in medical settings for patients with an autism spectrum disorder.	30	30_anxiety_symptoms_social_parent	['anxiety', 'symptoms', 'social', 'parent', 'youth', 'sad', 'children', 'asd', 'uncertainty', 'iu']	['Children with Autism Spectrum Disorder are vulnerable to anxiety. Repetitive behaviours are a core feature of Autism Spectrum Disorder (ASD) and have been associated anxiety. This study examined repetitive behaviours and anxiety in two groups of children with autism spectrum disorder, those with high anxiety and those with lower levels of anxiety. Children with high anxiety had more repetitive …	anxiety - symptoms - social - parent - youth - sad - children - asd - uncertainty - iu	1	FALSE
22743806	2013	6	28	(Re-)conceptualisation in Asperger's syndrome and typical individuals with varying degrees of autistic-like traits.	10	10_memory_visual_processing_perceptual	['memory', 'visual', 'processing', 'perceptual', 'task', 'motion', 'perception', 'local', 'tasks', 'global']	['What does an individual with autism spectrum disorder (ASD) perceive first: the forest or the trees? In spite of 30 years of research and influential theories like the weak central coherence (WCC) theory and the enhanced perceptual functioning (EPF) account, the interplay of local and global visual processing in ASD remains only partly understood. Research findings vary in indicating a local pr…	memory - visual - processing - perceptual - task - motion - perception - local - tasks - global	0.217296	FALSE
22747567	2013	4	1	Perinatal stress, brain inflammation and risk of autism-review and proposal.	53	53_immune_maternal_mia_il	['immune', 'maternal', 'mia', 'il', 'autoantibodies', 'offspring', 'fetal', 'inflammation', 'activation', 'infection']	["Maternal health during pregnancy plays a major role in shaping health and disease risks in the offspring. The maternal immune activation hypothesis proposes that inflammatory perturbations in utero can affect fetal neurodevelopment, and evidence from human epidemiological studies supports an association between maternal inflammation during pregnancy and offspring neurodevelopmental disorders (N…	immune - maternal - mia - il - autoantibodies - offspring - fetal - inflammation - activation - infection	0.675693	FALSE
22748016	2013	6	10	Elevated serum levels of interleukin-17A in children with autism.	49	49_il_immune_cytokine_cytokines	['il', 'immune', 'cytokine', 'cytokines', 'inflammatory', 'levels', 'cells', 'interleukin', '1Î²', 'serum']	['B cells play multiple roles in preservation of healthy immune system including management of immune responses by expression of pro- and anti-inflammatory cytokines. Several earlier studies have documented that B cells express both pro-inflammatory cytokines such as IL-6, TNF-Î± as well as anti-inflammatory cytokines such as IL-10. However, it is yet to be examined whether these pro-/anti-inflam…	il - immune - cytokine - cytokines - inflammatory - levels - cells - interleukin - 1Î² - serum	1	FALSE
22748032	2013	9	16	Pragmatic language impairment and associated behavioural problems.	1	1_language_children_speech_expressive	['language', 'children', 'speech', 'expressive', 'verbal', 'vocabulary', 'pragmatic', 'words', 'word', 'communication']	['Both small-scale and epidemiological longitudinal studies of early language delay indicate that most late talkers attain language scores in the average range by age 5, 6, or 7. However, late talker groups typically obtain significantly lower scores than groups with typical language histories on most language measures into adolescence. These findings support a dimensional account of language del…	language - children - speech - expressive - verbal - vocabulary - pragmatic - words - word - communication	0.636047	FALSE
22749736	2013	6	26	SHANK3 as an autism spectrum disorder-associated gene.	-1	-1_asd_autism_children_disorder	['asd', 'autism', 'children', 'disorder', 'social', 'spectrum', 'study', 'disorders', 'autistic', 'individuals']	["Whether parental psychiatric disorders are associated with autism spectrum disorder (ASD) in offspring has remained inconclusive. We examined the associations of parental psychiatric disorders with ASD in offspring. This population-based case-control study used Taiwan's National Health Insurance Research Database to identify a cohort of children born from 2004 to 2017 and their parents. A total…	asd - autism - children - disorder - social - spectrum - study - disorders - autistic - individuals	0.660783	FALSE
22751751	2014	2	19	Longitudinal study of perceived negative impact in African American and Caucasian mothers of children with autism spectrum disorder.	-1	-1_asd_autism_children_disorder	['asd', 'autism', 'children', 'disorder', 'social', 'spectrum', 'study', 'disorders', 'autistic', 'individuals']	["Whether parental psychiatric disorders are associated with autism spectrum disorder (ASD) in offspring has remained inconclusive. We examined the associations of parental psychiatric disorders with ASD in offspring. This population-based case-control study used Taiwan's National Health Insurance Research Database to identify a cohort of children born from 2004 to 2017 and their parents. A total…	asd - autism - children - disorder - social - spectrum - study - disorders - autistic - individuals	0.839384	FALSE
22751752	2014	4	3	Predicting language and social outcomes at age 5 for later-born siblings of children with autism spectrum disorders.	-1	-1_asd_autism_children_disorder	['asd', 'autism', 'children', 'disorder', 'social', 'spectrum', 'study', 'disorders', 'autistic', 'individuals']	["Whether parental psychiatric disorders are associated with autism spectrum disorder (ASD) in offspring has remained inconclusive. We examined the associations of parental psychiatric disorders with ASD in offspring. This population-based case-control study used Taiwan's National Health Insurance Research Database to identify a cohort of children born from 2004 to 2017 and their parents. A total…	asd - autism - children - disorder - social - spectrum - study - disorders - autistic - individuals	0.610657	FALSE
22752149	2013	1	2	Family history of schizophrenia and bipolar disorder as risk factors for autism.	-1	-1_asd_autism_children_disorder	['asd', 'autism', 'children', 'disorder', 'social', 'spectrum', 'study', 'disorders', 'autistic', 'individuals']	["Whether parental psychiatric disorders are associated with autism spectrum disorder (ASD) in offspring has remained inconclusive. We examined the associations of parental psychiatric disorders with ASD in offspring. This population-based case-control study used Taiwan's National Health Insurance Research Database to identify a cohort of children born from 2004 to 2017 and their parents. A total…	asd - autism - children - disorder - social - spectrum - study - disorders - autistic - individuals	0.186495	FALSE
22752846	2013	7	19	Recreational participation of children with High Functioning Autism.	-1	-1_asd_autism_children_disorder	['asd', 'autism', 'children', 'disorder', 'social', 'spectrum', 'study', 'disorders', 'autistic', 'individuals']	["Whether parental psychiatric disorders are associated with autism spectrum disorder (ASD) in offspring has remained inconclusive. We examined the associations of parental psychiatric disorders with ASD in offspring. This population-based case-control study used Taiwan's National Health Insurance Research Database to identify a cohort of children born from 2004 to 2017 and their parents. A total…	asd - autism - children - disorder - social - spectrum - study - disorders - autistic - individuals	0.457684	FALSE
22753237	2013	1	7	Selective attention to facial emotion and identity in children with autism: evidence for global identity and local emotion.	29	29_emotion_facial_expressions_recognition	['emotion', 'facial', 'expressions', 'recognition', 'emotions', 'emotional', 'face', 'faces', 'happy', 'angry']	["Facial mimicry as well as the accurate assessment of one's performance when judging others' emotional expressions have been suggested to inform successful emotion recognition. Differences in the integration of these two information sources might explain alterations in the perception of others' emotions in individuals with Social Anxiety Disorder and individuals on the autism spectrum. Using a n…	emotion - facial - expressions - recognition - emotions - emotional - face - faces - happy - angry	0.120132	FALSE
22753382	2013	4	10	Immune system gene dysregulation in autism and schizophrenia.	53	53_immune_maternal_mia_il	['immune', 'maternal', 'mia', 'il', 'autoantibodies', 'offspring', 'fetal', 'inflammation', 'activation', 'infection']	["Maternal health during pregnancy plays a major role in shaping health and disease risks in the offspring. The maternal immune activation hypothesis proposes that inflammatory perturbations in utero can affect fetal neurodevelopment, and evidence from human epidemiological studies supports an association between maternal inflammation during pregnancy and offspring neurodevelopmental disorders (N…	immune - maternal - mia - il - autoantibodies - offspring - fetal - inflammation - activation - infection	0.556562	FALSE
22757768	2014	5	22	Unintentional injuries among youth with developmental disabilities in the United States, 2006-2007.	-1	-1_asd_autism_children_disorder	['asd', 'autism', 'children', 'disorder', 'social', 'spectrum', 'study', 'disorders', 'autistic', 'individuals']	["Whether parental psychiatric disorders are associated with autism spectrum disorder (ASD) in offspring has remained inconclusive. We examined the associations of parental psychiatric disorders with ASD in offspring. This population-based case-control study used Taiwan's National Health Insurance Research Database to identify a cohort of children born from 2004 to 2017 and their parents. A total…	asd - autism - children - disorder - social - spectrum - study - disorders - autistic - individuals	0.16398	FALSE
22760337	2013	7	19	Neural and behavioral responses during self-evaluative processes differ in youth with and without autism.	-1	-1_asd_autism_children_disorder	['asd', 'autism', 'children', 'disorder', 'social', 'spectrum', 'study', 'disorders', 'autistic', 'individuals']	["Whether parental psychiatric disorders are associated with autism spectrum disorder (ASD) in offspring has remained inconclusive. We examined the associations of parental psychiatric disorders with ASD in offspring. This population-based case-control study used Taiwan's National Health Insurance Research Database to identify a cohort of children born from 2004 to 2017 and their parents. A total…	asd - autism - children - disorder - social - spectrum - study - disorders - autistic - individuals	0.188385	FALSE
22760338	2013	7	19	The role of causal and intentional judgments in moral reasoning in individuals with high functioning autism.	-1	-1_asd_autism_children_disorder	['asd', 'autism', 'children', 'disorder', 'social', 'spectrum', 'study', 'disorders', 'autistic', 'individuals']	["Whether parental psychiatric disorders are associated with autism spectrum disorder (ASD) in offspring has remained inconclusive. We examined the associations of parental psychiatric disorders with ASD in offspring. This population-based case-control study used Taiwan's National Health Insurance Research Database to identify a cohort of children born from 2004 to 2017 and their parents. A total…	asd - autism - children - disorder - social - spectrum - study - disorders - autistic - individuals	0.44426	FALSE
22760919	2013	4	10	The major histocompatibility complex and autism spectrum disorder.	49	49_il_immune_cytokine_cytokines	['il', 'immune', 'cytokine', 'cytokines', 'inflammatory', 'levels', 'cells', 'interleukin', '1Î²', 'serum']	['B cells play multiple roles in preservation of healthy immune system including management of immune responses by expression of pro- and anti-inflammatory cytokines. Several earlier studies have documented that B cells express both pro-inflammatory cytokines such as IL-6, TNF-Î± as well as anti-inflammatory cytokines such as IL-10. However, it is yet to be examined whether these pro-/anti-inflam…	il - immune - cytokine - cytokines - inflammatory - levels - cells - interleukin - 1Î² - serum	0.298025	FALSE
22763160	2013	5	28	[The etiology of schizophrenia].	31	31_genetic_psychiatric_schizophrenia_polygenic	['genetic', 'psychiatric', 'schizophrenia', 'polygenic', 'adhd', 'genome', 'disorders', 'wide', 'bipolar', 'major']	['Epidemiological studies demonstrate an association between classes of obesity and psychiatric disorders, although little is known about shared genetics and causality of association. Thus, we aimed to investigate shared genetics and causal link between different classes of obesity and psychiatric disorders.We used genome-wide association study (GWAS) summary data range from 9725 to 500,199 sampl…	genetic - psychiatric - schizophrenia - polygenic - adhd - genome - disorders - wide - bipolar - major	0.0731597	FALSE
22767137	2013	8	15	Identification of expanded alleles of the FMR1 Gene in the CHildhood Autism Risks from Genes and Environment (CHARGE) study.	54	54_fxs_fragile_fmrp_fmr1	['fxs', 'fragile', 'fmrp', 'fmr1', 'cgg', 'syndrome', 'protein', 'retardation', 'translation', 'mrna']	['Fragile X syndrome (FXS) is recognized as the most common genetic cause of intellectual disability and autism spectrum disorder (ASD). Although symptoms of ASD are frequently observed in patients with FXS, researchers have not yet clearly determined whether the symptoms in patients with FXS differ from the symptoms in patients without ASD or nonsyndromic ASD. Behavioral similarities and differe…	fxs - fragile - fmrp - fmr1 - cgg - syndrome - protein - retardation - translation - mrna	0.198865	FALSE
22767138	2013	8	15	Brief report: structure of personal narratives of adults with autism spectrum disorder.	1	1_language_children_speech_expressive	['language', 'children', 'speech', 'expressive', 'verbal', 'vocabulary', 'pragmatic', 'words', 'word', 'communication']	['Both small-scale and epidemiological longitudinal studies of early language delay indicate that most late talkers attain language scores in the average range by age 5, 6, or 7. However, late talker groups typically obtain significantly lower scores than groups with typical language histories on most language measures into adolescence. These findings support a dimensional account of language del…	language - children - speech - expressive - verbal - vocabulary - pragmatic - words - word - communication	0.0784616	FALSE
22767139	2013	7	19	The role of parenting stress in discrepancies between parent and teacher ratings of behavior problems in young children with autism spectrum disorder.	4	4_parenting_stress_mothers_parents	['parenting', 'stress', 'mothers', 'parents', 'coping', 'child', 'fathers', 'family', 'parental', 'support']	['The aim of the study was to investigate the perception of the family functioning in parents of children with autism spectrum disorders (ASD) with normal-range intelligence and the relationships between family functioning, parenting stress and quality of life. Dyads of parents of children with ASD without intellectual disability and parents of typically developing children (controls) completed a…	parenting - stress - mothers - parents - coping - child - fathers - family - parental - support	0.646094	FALSE
22767933	2013	1	14	'Theory of mind' II: Difficulties and critiques.	-1	-1_asd_autism_children_disorder	['asd', 'autism', 'children', 'disorder', 'social', 'spectrum', 'study', 'disorders', 'autistic', 'individuals']	["Whether parental psychiatric disorders are associated with autism spectrum disorder (ASD) in offspring has remained inconclusive. We examined the associations of parental psychiatric disorders with ASD in offspring. This population-based case-control study used Taiwan's National Health Insurance Research Database to identify a cohort of children born from 2004 to 2017 and their parents. A total…	asd - autism - children - disorder - social - spectrum - study - disorders - autistic - individuals	0.609487	FALSE
22771985	2013	3	29	Social support is associated with blood pressure responses in parents caring for children with developmental disabilities.	4	4_parenting_stress_mothers_parents	['parenting', 'stress', 'mothers', 'parents', 'coping', 'child', 'fathers', 'family', 'parental', 'support']	['The aim of the study was to investigate the perception of the family functioning in parents of children with autism spectrum disorders (ASD) with normal-range intelligence and the relationships between family functioning, parenting stress and quality of life. Dyads of parents of children with ASD without intellectual disability and parents of typically developing children (controls) completed a…	parenting - stress - mothers - parents - coping - child - fathers - family - parental - support	0.117676	FALSE
22772925	2013	1	29	Study of dual angiogenic/neurogenic growth factors among Saudi autistic children and their correlation with the severity of this disorder.	51	51_bdnf_serum_biomarkers_proteins	['bdnf', 'serum', 'biomarkers', 'proteins', 'levels', 'neurotrophic', 'igf', 'factor', 'protein', 'biomarker']	["The aim of our study was to illuminate the potential role of brain-derived neurotrophic factor (BDNF) in autism spectrum disorder (ASD). We measured the circulating levels of BDNF in serum and BDNF gene (Val66Met) polymorphisms, in which two indicators were then compared between ASD and normal controls. A total of 82 drug-naÃ¯ve ASD children and 82 age- and gender-matched normal controls were e…	bdnf - serum - biomarkers - proteins - levels - neurotrophic - igf - factor - protein - biomarker	1	FALSE
22773736	2013	3	14	Excess variants in AFF2 detected by massively parallel sequencing of males with autism spectrum disorder.	-1	-1_asd_autism_children_disorder	['asd', 'autism', 'children', 'disorder', 'social', 'spectrum', 'study', 'disorders', 'autistic', 'individuals']	["Whether parental psychiatric disorders are associated with autism spectrum disorder (ASD) in offspring has remained inconclusive. We examined the associations of parental psychiatric disorders with ASD in offspring. This population-based case-control study used Taiwan's National Health Insurance Research Database to identify a cohort of children born from 2004 to 2017 and their parents. A total…	asd - autism - children - disorder - social - spectrum - study - disorders - autistic - individuals	0.336098	FALSE
22775456	2013	1	14	Methylenetetrahydrofolate reductase polymorphisms C677T and risk of autism in the Chinese Han population.	-1	-1_asd_autism_children_disorder	['asd', 'autism', 'children', 'disorder', 'social', 'spectrum', 'study', 'disorders', 'autistic', 'individuals']	["Whether parental psychiatric disorders are associated with autism spectrum disorder (ASD) in offspring has remained inconclusive. We examined the associations of parental psychiatric disorders with ASD in offspring. This population-based case-control study used Taiwan's National Health Insurance Research Database to identify a cohort of children born from 2004 to 2017 and their parents. A total…	asd - autism - children - disorder - social - spectrum - study - disorders - autistic - individuals	0.766541	FALSE
22775580	2013	5	16	Anxiety and quality of life: clinically anxious children with and without autism spectrum disorders compared.	30	30_anxiety_symptoms_social_parent	['anxiety', 'symptoms', 'social', 'parent', 'youth', 'sad', 'children', 'asd', 'uncertainty', 'iu']	['Children with Autism Spectrum Disorder are vulnerable to anxiety. Repetitive behaviours are a core feature of Autism Spectrum Disorder (ASD) and have been associated anxiety. This study examined repetitive behaviours and anxiety in two groups of children with autism spectrum disorder, those with high anxiety and those with lower levels of anxiety. Children with high anxiety had more repetitive …	anxiety - symptoms - social - parent - youth - sad - children - asd - uncertainty - iu	1	FALSE
22777105	2013	8	15	Is infertility associated with childhood autism?	5	5_birth_risk_born_95	['birth', 'risk', 'born', '95', 'ci', 'preterm', 'maternal', 'perinatal', 'age', 'factors']	['We sought to estimate the prevalence of autism spectrum disorder (ASD) in children born extremely preterm relative to the U.S. population risk of 1.5% [CDC, 2014] using the best-available diagnostic procedures and minimizing confounding with other neurodevelopmental impairments. Eight hundred and eighty nine of 966 (92%) 10-year-old children from the Extremely Low Gestational Age Newborn birth …	birth - risk - born - 95 - ci - preterm - maternal - perinatal - age - factors	0.0630664	FALSE
22777602	2014	2	3	Changes in grey matter development in autism spectrum disorder.	19	19_volume_cortical_brain_matter	['volume', 'cortical', 'brain', 'matter', 'thickness', 'gray', 'gm', 'structural', 'volumes', 'surface']	['Results on grey matter (GM) structural alterations in autism spectrum disorder (ASD) are inconclusive. Moreover, little is known about age effects on brain-structure abnormalities in ASD beyond childhood. Here, we aimed to examine regional GM volumes in a large sample of children, adolescents, and adults with ASD. Magnetic resonance imaging scans were obtained in 47 male ASD subjects and 51 mat…	volume - cortical - brain - matter - thickness - gray - gm - structural - volumes - surface	1	TRUE
22778016	2013	4	9	Identification of two inherited copy number variants in a male with autism supports two-hit and compound heterozygosity models of autism.	-1	-1_asd_autism_children_disorder	['asd', 'autism', 'children', 'disorder', 'social', 'spectrum', 'study', 'disorders', 'autistic', 'individuals']	["Whether parental psychiatric disorders are associated with autism spectrum disorder (ASD) in offspring has remained inconclusive. We examined the associations of parental psychiatric disorders with ASD in offspring. This population-based case-control study used Taiwan's National Health Insurance Research Database to identify a cohort of children born from 2004 to 2017 and their parents. A total…	asd - autism - children - disorder - social - spectrum - study - disorders - autistic - individuals	0.344619	FALSE
22780332	2013	5	17	The perception and identification of facial emotions in individuals with autism spectrum disorders using the Let's Face It! Emotion Skills Battery.	29	29_emotion_facial_expressions_recognition	['emotion', 'facial', 'expressions', 'recognition', 'emotions', 'emotional', 'face', 'faces', 'happy', 'angry']	["Facial mimicry as well as the accurate assessment of one's performance when judging others' emotional expressions have been suggested to inform successful emotion recognition. Differences in the integration of these two information sources might explain alterations in the perception of others' emotions in individuals with Social Anxiety Disorder and individuals on the autism spectrum. Using a n…	emotion - facial - expressions - recognition - emotions - emotional - face - faces - happy - angry	1	FALSE
22781058	2014	4	3	The First Year Inventory: a longitudinal follow-up of 12-month-old to 3-year-old children.	0	0_diagnostic_screening_dsm_diagnosis	['diagnostic', 'screening', 'dsm', 'diagnosis', 'autism', 'ados', 'chat', 'months', 'developmental', 'specificity']	["The Modified Checklist for Autism in Toddlers (M-CHAT) could be appropriate for universal screening for autism spectrum disorder (ASD) at 18 months and 24 months. Validation studies, however, reported differences in psychometric properties across sample populations. This meta-analysis summarized its accuracy measures and quantified their change in relation to patient and study characteristics.F…	diagnostic - screening - dsm - diagnosis - autism - ados - chat - months - developmental - specificity	0.152396	FALSE
22781167	2013	3	14	Evidence of oxidative damage and inflammation associated with low glutathione redox status in the autism brain.	81	81_oxidative_stress_antioxidant_glutathione	['oxidative', 'stress', 'antioxidant', 'glutathione', 'gsh', 'plasma', 'levels', 'gssg', 'sod', 'redox']	['Despite increasing evidence of oxidative stress in the pathophysiology of autism, most studies have not evaluated biomarkers within specific brain regions, and the functional consequences of oxidative stress remain relatively understudied. We examined frozen samples from the cerebellum and temporal cortex (Brodmann area 22 (BA22)) from individuals with autism and unaffected controls (n=15 and n…	oxidative - stress - antioxidant - glutathione - gsh - plasma - levels - gssg - sod - redox	1	TRUE
22782459	2013	6	10	Celecoxib as adjunctive treatment to risperidone in children with autistic disorder: a randomized, double-blind, placebo-controlled trial.	21	21_risperidone_aripiprazole_irritability_placebo	['risperidone', 'aripiprazole', 'irritability', 'placebo', 'treatment', 'mg', 'drug', 'abc', 'effects', 'dose']	['The objective of this trial, Biomarkers in Autism of Aripiprazole and Risperidone Treatment (BAART), was to provide support and guidance for an evidence-based approach for the selection and monitoring of initial pharmacotherapy in patients with autism by assessing predictors of efficacy, tolerability, and safety. This randomized double-blind parallel-group study was conducted in three academic …	risperidone - aripiprazole - irritability - placebo - treatment - mg - drug - abc - effects - dose	0.243122	FALSE
22782649	2013	8	15	Parents' perspectives on participating in genetic research in autism.	104	104_testing_genetic_genetics_parents	['testing', 'genetic', 'genetics', 'parents', 'families', 'research', 'knowledge', 'pgt', 'services', 'ethical']	['This study examined the experiences of Autism Spectrum Disorder (ASD) genetic testing among parents of children with ASD. A nationwide sample of 552 parents of children with ASD completed an online survey. Nearly one-quarter (22.5%) of the parents reported that their affected children had undergone ASD genetic testing. The testing utilization was associated with awareness of ASD genetic testing…	testing - genetic - genetics - parents - families - research - knowledge - pgt - services - ethical	1	FALSE
22786754	2013	4	8	Diffusion tensor imaging in autism spectrum disorder: a review.	48	48_matter_white_diffusion_tracts	['matter', 'white', 'diffusion', 'tracts', 'diffusivity', 'fa', 'anisotropy', 'tract', 'fractional', 'dti']	['Abnormal functional connections are associated with impaired white matter tract integrity in the brain. Diffusion tensor imaging (DTI) is a promising method for evaluating white matter integrity in infants and young children. This work aims to shed light on the location and nature of the decrease in white matter integrity.Here, the results of 19 studies have been presented that investigated whi…	matter - white - diffusion - tracts - diffusivity - fa - anisotropy - tract - fractional - dti	1	TRUE
22790382	2013	8	15	Effects of computer simulation training on in vivo discrete trial teaching.	-1	-1_asd_autism_children_disorder	['asd', 'autism', 'children', 'disorder', 'social', 'spectrum', 'study', 'disorders', 'autistic', 'individuals']	["Whether parental psychiatric disorders are associated with autism spectrum disorder (ASD) in offspring has remained inconclusive. We examined the associations of parental psychiatric disorders with ASD in offspring. This population-based case-control study used Taiwan's National Health Insurance Research Database to identify a cohort of children born from 2004 to 2017 and their parents. A total…	asd - autism - children - disorder - social - spectrum - study - disorders - autistic - individuals	0.613921	FALSE
22790383	2013	7	19	Brief report: treating stuttering in an adult with autism spectrum disorder.	1	1_language_children_speech_expressive	['language', 'children', 'speech', 'expressive', 'verbal', 'vocabulary', 'pragmatic', 'words', 'word', 'communication']	['Both small-scale and epidemiological longitudinal studies of early language delay indicate that most late talkers attain language scores in the average range by age 5, 6, or 7. However, late talker groups typically obtain significantly lower scores than groups with typical language histories on most language measures into adolescence. These findings support a dimensional account of language del…	language - children - speech - expressive - verbal - vocabulary - pragmatic - words - word - communication	0.290022	FALSE
22791126	2013	9	30	Infantile cerebellar pilocytic astrocytoma with autism spectrum disorder.	102	102_cerebellar_cerebellum_crus_motor	['cerebellar', 'cerebellum', 'crus', 'motor', 'purkinje', 'granule', 'connectivity', 'cells', 'functions', 'functional']	['The cerebellum has long been conceptualized to control motor learning and motor coordination. However, increasing evidence suggests its roles in cognition and emotion behaviors. In particular, the cerebellum has been recognized as one of key brain regions affected in autism spectrum disorder (ASD). To better understand the contribution of the cerebellum in ASD pathogenesis, we here discuss rece…	cerebellar - cerebellum - crus - motor - purkinje - granule - connectivity - cells - functions - functional	1	FALSE
22795968	2013	2	27	Analysis of copy number variations in brain DNA from patients with schizophrenia and other psychiatric disorders.	69	69_cnvs_cnv_copy_genomic	['cnvs', 'cnv', 'copy', 'genomic', 'pathogenic', 'array', 'number', 'chromosomal', 'variants', 'microarray']	['Chromosomal microarray analysis (CMA) is currently considered a first-tier diagnostic assay for the investigation of autism spectrum disorders (ASD), developmental delay and intellectual disability of unknown etiology. High-resolution arrays were utilized for the identification of copy number variations (CNVs) in 195 ASD patients of Greek origin (126 males, 69 females). CMA resulted in the dete…	cnvs - cnv - copy - genomic - pathogenic - array - number - chromosomal - variants - microarray	1	FALSE
22796228	2014	1	23	Manifesto for a European research network into obsessive-compulsive and related disorders.	82	82_ocd_compulsive_obsessive_hoarding	['ocd', 'compulsive', 'obsessive', 'hoarding', 'cbt', 'oc', 'bocs', 'symptoms', 'treatment', 'obsessions']	['Obsessive-compulsive disorder (OCD) and autism spectrum disorders (ASD) commonly co-occur and are considered challenging to manage when they co-occur in youth. However, clinical characteristics and prognosis of this group remain poorly understood. This study examined the prevalence, clinical correlates and outcomes of paediatric OCD co-occurring with ASD (OCD\u2009+\u2009ASD) in a large clinica…	ocd - compulsive - obsessive - hoarding - cbt - oc - bocs - symptoms - treatment - obsessions	1	FALSE
22796975	2014	9	29	[The projection of autism spectrum disorders in adult life].	0	0_diagnostic_screening_dsm_diagnosis	['diagnostic', 'screening', 'dsm', 'diagnosis', 'autism', 'ados', 'chat', 'months', 'developmental', 'specificity']	["The Modified Checklist for Autism in Toddlers (M-CHAT) could be appropriate for universal screening for autism spectrum disorder (ASD) at 18 months and 24 months. Validation studies, however, reported differences in psychometric properties across sample populations. This meta-analysis summarized its accuracy measures and quantified their change in relation to patient and study characteristics.F…	diagnostic - screening - dsm - diagnosis - autism - ados - chat - months - developmental - specificity	0.145667	FALSE
22798050	2013	8	15	Children with disabilities are often misdiagnosed initially and children with neuropsychiatric disorders are referred to adequate resources 30 months later than children with other disabilities.	63	63_screening_referral_knowledge_pharmacists	['screening', 'referral', 'knowledge', 'pharmacists', 'care', 'diagnostic', 'referrals', 'diagnosis', 'training', 'practices']	['Autism spectrum disorder (ASD) screening completion rates are often low despite their validity and influence on earlier intervention and positive treatment outcomes. This study sought to examine the use of one ASD screening tool, the Modified Checklist for Autism in Toddlers-Revised (MCHAT-R), in a racially and ethnically diverse urban pediatric clinic to review potential disparities within scr…	screening - referral - knowledge - pharmacists - care - diagnostic - referrals - diagnosis - training - practices	0.253368	FALSE
22798051	2013	8	15	The effects of covert audio coaching on teaching clerical skills to adolescents with autism spectrum disorder.	98	98_video_modeling_students_skills	['video', 'modeling', 'students', 'skills', 'instruction', 'vm', 'participants', 'design', 'heuristics', 'intervention']	['Many individuals with autism spectrum disorders (ASD) show deficits in functional living skills, leading to low independence, limited community involvement, and poor quality of life. With development of mobile devices, utilizing video modeling has become more feasible for educators to promote functional living skills of individuals with ASD.This article aims to review the single-case experiment…	video - modeling - students - skills - instruction - vm - participants - design - heuristics - intervention	1	FALSE
22800511	2013	11	15	More consistent, yet less sensitive: interval timing in autism spectrum disorders.	-1	-1_asd_autism_children_disorder	['asd', 'autism', 'children', 'disorder', 'social', 'spectrum', 'study', 'disorders', 'autistic', 'individuals']	["Whether parental psychiatric disorders are associated with autism spectrum disorder (ASD) in offspring has remained inconclusive. We examined the associations of parental psychiatric disorders with ASD in offspring. This population-based case-control study used Taiwan's National Health Insurance Research Database to identify a cohort of children born from 2004 to 2017 and their parents. A total…	asd - autism - children - disorder - social - spectrum - study - disorders - autistic - individuals	0.200835	FALSE
22801298	2013	5	6	Electroconvulsive therapy in an adolescent with autism and bipolar I disorder.	-1	-1_asd_autism_children_disorder	['asd', 'autism', 'children', 'disorder', 'social', 'spectrum', 'study', 'disorders', 'autistic', 'individuals']	["Whether parental psychiatric disorders are associated with autism spectrum disorder (ASD) in offspring has remained inconclusive. We examined the associations of parental psychiatric disorders with ASD in offspring. This population-based case-control study used Taiwan's National Health Insurance Research Database to identify a cohort of children born from 2004 to 2017 and their parents. A total…	asd - autism - children - disorder - social - spectrum - study - disorders - autistic - individuals	0.938458	FALSE
22806000	2013	2	11	Exploring the proposed DSM-5 criteria in a clinical sample.	0	0_diagnostic_screening_dsm_diagnosis	['diagnostic', 'screening', 'dsm', 'diagnosis', 'autism', 'ados', 'chat', 'months', 'developmental', 'specificity']	["The Modified Checklist for Autism in Toddlers (M-CHAT) could be appropriate for universal screening for autism spectrum disorder (ASD) at 18 months and 24 months. Validation studies, however, reported differences in psychometric properties across sample populations. This meta-analysis summarized its accuracy measures and quantified their change in relation to patient and study characteristics.F…	diagnostic - screening - dsm - diagnosis - autism - ados - chat - months - developmental - specificity	1	FALSE
22806001	2013	8	15	Emotional resonance deficits in autistic children.	35	35_imitation_motor_mirror_action	['imitation', 'motor', 'mirror', 'action', 'actions', 'movement', 'interpersonal', 'movements', 'synchrony', 'hand']	['Imitation is a potentially crucial aspect of social cognitive development. Although deficits in imitation ability have been widely demonstrated in autism spectrum disorder (ASD), the specificity and significance of the findings is unclear, due largely to methodological limitations. We developed a novel assessment of imitation ability, using objective movement parameters (path length and action …	imitation - motor - mirror - action - actions - movement - interpersonal - movements - synchrony - hand	1	FALSE
22806002	2013	8	15	Reliability and validity of autism diagnostic interview-revised, Japanese version.	0	0_diagnostic_screening_dsm_diagnosis	['diagnostic', 'screening', 'dsm', 'diagnosis', 'autism', 'ados', 'chat', 'months', 'developmental', 'specificity']	["The Modified Checklist for Autism in Toddlers (M-CHAT) could be appropriate for universal screening for autism spectrum disorder (ASD) at 18 months and 24 months. Validation studies, however, reported differences in psychometric properties across sample populations. This meta-analysis summarized its accuracy measures and quantified their change in relation to patient and study characteristics.F…	diagnostic - screening - dsm - diagnosis - autism - ados - chat - months - developmental - specificity	0.425276	FALSE
22806337	2013	1	29	Co-occurring anger in young people with Asperger's syndrome.	-1	-1_asd_autism_children_disorder	['asd', 'autism', 'children', 'disorder', 'social', 'spectrum', 'study', 'disorders', 'autistic', 'individuals']	["Whether parental psychiatric disorders are associated with autism spectrum disorder (ASD) in offspring has remained inconclusive. We examined the associations of parental psychiatric disorders with ASD in offspring. This population-based case-control study used Taiwan's National Health Insurance Research Database to identify a cohort of children born from 2004 to 2017 and their parents. A total…	asd - autism - children - disorder - social - spectrum - study - disorders - autistic - individuals	0.845657	FALSE
22817763	2013	2	7	A clinico-radiological phenotype of voltage-gated potassium channel complex antibody-mediated disorder presenting with seizures and basal ganglia changes.	96	96_channel_scn2a_channels_voltage	['channel', 'scn2a', 'channels', 'voltage', 'variants', 'gated', 'scn8a', 'sodium', 'calcium', 'mutation']	['Autism spectrum disorder is a complex-genetic disease and its etiology is unknown for the majority of cases. So far, more than one hundred different susceptibility genes were detected. Voltage-gated calcium channels are among the candidates linked to autism spectrum disorder by results of genetic studies. Mutations of nearly all pore-forming and some auxiliary subunits of voltage gated calcium …	channel - scn2a - channels - voltage - variants - gated - scn8a - sodium - calcium - mutation	1	FALSE
22818902	2014	1	15	Reduced multisensory facilitation in persons with autism.	112	112_multisensory_temporal_audiovisual_integration	['multisensory', 'temporal', 'audiovisual', 'integration', 'sensory', 'auditory', 'visual', 'stimuli', 'perceptual', 'msi']	['It has been recently theorized that atypical sensory processing in autism relates to difficulties in social communication. Through a series of tasks concurrently assessing multisensory temporal processes, multisensory integration and speech perception in 76 children with and without autism, we provide the first behavioral evidence of such a link. Temporal processing abilities in children with a…	multisensory - temporal - audiovisual - integration - sensory - auditory - visual - stimuli - perceptual - msi	1	FALSE
22819155	2013	9	3	Dental health - a challenging problem for a patient with autism spectrum disorder.	27	27_dental_oral_care_caries	['dental', 'oral', 'care', 'caries', 'hygiene', 'health', 'dmft', 'teeth', 'children', 'orthodontic']	['Autism spectrum disorder (ASD) is characterized by impairments in social interaction and communication, restricted patterns of behaviour, and unusual sensory sensitivities. The hypotheses to be tested were that adult patients with ASD have a higher caries prevalence, have more risk factors for caries development, and utilize dental health care to a lesser extent than people recruited from the n…	dental - oral - care - caries - hygiene - health - dmft - teeth - children - orthodontic	0.940424	FALSE
22820061	2013	3	29	Positive parenting of children with developmental disabilities: a meta-analysis.	4	4_parenting_stress_mothers_parents	['parenting', 'stress', 'mothers', 'parents', 'coping', 'child', 'fathers', 'family', 'parental', 'support']	['The aim of the study was to investigate the perception of the family functioning in parents of children with autism spectrum disorders (ASD) with normal-range intelligence and the relationships between family functioning, parenting stress and quality of life. Dyads of parents of children with ASD without intellectual disability and parents of typically developing children (controls) completed a…	parenting - stress - mothers - parents - coping - child - fathers - family - parental - support	0.0968512	FALSE
22820063	2013	3	29	What do we know about the atypical development of exploratory actions during infancy?	5	5_birth_risk_born_95	['birth', 'risk', 'born', '95', 'ci', 'preterm', 'maternal', 'perinatal', 'age', 'factors']	['We sought to estimate the prevalence of autism spectrum disorder (ASD) in children born extremely preterm relative to the U.S. population risk of 1.5% [CDC, 2014] using the best-available diagnostic procedures and minimizing confounding with other neurodevelopmental impairments. Eight hundred and eighty nine of 966 (92%) 10-year-old children from the Extremely Low Gestational Age Newborn birth …	birth - risk - born - 95 - ci - preterm - maternal - perinatal - age - factors	0.0666015	FALSE
22823064	2014	5	26	CYP1A2 polymorphisms in slow melatonin metabolisers: a possible relationship with autism spectrum disorder?	87	87_melatonin_sleep_circadian_insomnia	['melatonin', 'sleep', 'circadian', 'insomnia', 'asmt', 'rhythms', 'clock', 'rhythm', 'disturbances', 'pedprm']	['Melatonin is one of the most used pharmacologic treatments for sleep problems in autism spectrum disorder, though its relationship with circadian and sleep parameters is still not well stablished. A naturalistic study was conducted in children with autism spectrum disorder, previously drug-naÃ¯ve, before and after treatment with immediate-release melatonin. Circadian rhythms and sleep parameter…	melatonin - sleep - circadian - insomnia - asmt - rhythms - clock - rhythm - disturbances - pedprm	1	FALSE
22825926	2013	8	15	A parent-mediated intervention to increase responsive parental behaviors and child communication in children with ASD: a randomized clinical trial.	-1	-1_asd_autism_children_disorder	['asd', 'autism', 'children', 'disorder', 'social', 'spectrum', 'study', 'disorders', 'autistic', 'individuals']	["Whether parental psychiatric disorders are associated with autism spectrum disorder (ASD) in offspring has remained inconclusive. We examined the associations of parental psychiatric disorders with ASD in offspring. This population-based case-control study used Taiwan's National Health Insurance Research Database to identify a cohort of children born from 2004 to 2017 and their parents. A total…	asd - autism - children - disorder - social - spectrum - study - disorders - autistic - individuals	0.0177992	FALSE
22828807	2013	6	19	16p11.2-p12.2 duplication syndrome; a genomic condition differentiated from euchromatic variation of 16p11.2.	16	16_deletion_duplication_16p11_22q11	['deletion', 'duplication', '16p11', '22q11', 'deletions', 'syndrome', 'region', 'microdeletion', 'carriers', 'duplications']	['Copy number variants (CNVs) are genetic rearrangements, such as deletions and duplications, which result in a deviation from the normal number of copies of a given gene segment. CNVs are implicated in many neuropsychiatric disorders. Deletions of the human chromosomal region 16p11.2 are one of the most common genetic linkages to autism spectrum disorders (ASD). However, ASD is not the only pres…	deletion - duplication - 16p11 - 22q11 - deletions - syndrome - region - microdeletion - carriers - duplications	1	FALSE
22829243	2013	10	17	Syndrome specificity and mother-child interactions: examining positive and negative parenting across contexts and time.	4	4_parenting_stress_mothers_parents	['parenting', 'stress', 'mothers', 'parents', 'coping', 'child', 'fathers', 'family', 'parental', 'support']	['The aim of the study was to investigate the perception of the family functioning in parents of children with autism spectrum disorders (ASD) with normal-range intelligence and the relationships between family functioning, parenting stress and quality of life. Dyads of parents of children with ASD without intellectual disability and parents of typically developing children (controls) completed a…	parenting - stress - mothers - parents - coping - child - fathers - family - parental - support	1	FALSE
22829244	2013	8	15	Are the autism and positive schizotypy spectra diametrically opposed in empathizing and systemizing?	62	62_schizophrenia_psychosis_schizotypal_psychotic	['schizophrenia', 'psychosis', 'schizotypal', 'psychotic', 'traits', 'schizotypy', 'symptoms', 'disorders', 'sads', 'autistic']	['Autism spectrum and schizophrenia spectrum disorders are classified separately in the DSM-5, yet research indicates that these two disorders share overlapping features. The aim of the present study was to examine the overlap between autistic and schizotypal personality traits and whether anxiety and depression act as confounding variables in this relationship within a non-clinical population. O…	schizophrenia - psychosis - schizotypal - psychotic - traits - schizotypy - symptoms - disorders - sads - autistic	0.0660451	FALSE
22829245	2013	8	15	Prevalence of psychotropic drug use in adults with intellectual disability: positive and negative findings from a large scale study.	70	70_psychotropic_antipsychotic_medication_antipsychotics	['psychotropic', 'antipsychotic', 'medication', 'antipsychotics', 'prescribed', 'medications', 'prescription', 'use', 'polypharmacy', 'drugs']	['The goal of this study was to examine rates of psychotropic medication use and identify associated child and family characteristics among children and adolescents with autism spectrum disorder (ASD) enrolled in an autism registry maintained by the Autism Treatment Network (ATN).The sample, derived from the ATN registry, consists of 2853 children aged 2 to 17 years with diagnoses of ASD supporte…	psychotropic - antipsychotic - medication - antipsychotics - prescribed - medications - prescription - use - polypharmacy - drugs	1	FALSE
22832355	2013	4	4	Identification of autoimmune gene signatures in autism.	57	57_snps_association_genetic_polymorphisms	['snps', 'association', 'genetic', 'polymorphisms', 'genome', 'allele', 'gene', 'haplotype', 'wide', 'genes']	["Autism spectrum disorder (ASD) is neurodevelopmental disorder characterized by stereotyped behavior and deficits in communication and social interactions. To date, numerous studies have investigated the associations between genetic variants and ASD risk. However, the results of these published studies lack a clear consensus. In the present study, we performed a systematic review on the associat…	snps - association - genetic - polymorphisms - genome - allele - gene - haplotype - wide - genes	1	FALSE
22832521	2013	4	4	A novel functional brain imaging endophenotype of autism: the neural response to facial expression of emotion.	100	100_face_faces_recognition_aftereffects	['face', 'faces', 'recognition', 'aftereffects', 'identity', 'processing', 'coding', 'facial', 'individuals', 'inversion']	['There are few direct examinations of whether face-processing difficulties in autism are disproportionate to difficulties with other complex non-face stimuli. Here we examined discrimination ability and memory for faces, cars, and inverted faces in children and adolescents with and without autism. Results showed that, relative to typical children, the difficulties of children and adolescents wit…	face - faces - recognition - aftereffects - identity - processing - coding - facial - individuals - inversion	0.282702	FALSE
22832681	2013	4	3	Social cognitive performance and different communication settings in groups of children with different disorders.	1	1_language_children_speech_expressive	['language', 'children', 'speech', 'expressive', 'verbal', 'vocabulary', 'pragmatic', 'words', 'word', 'communication']	['Both small-scale and epidemiological longitudinal studies of early language delay indicate that most late talkers attain language scores in the average range by age 5, 6, or 7. However, late talker groups typically obtain significantly lower scores than groups with typical language histories on most language measures into adolescence. These findings support a dimensional account of language del…	language - children - speech - expressive - verbal - vocabulary - pragmatic - words - word - communication	1	FALSE
22832731	2013	3	4	Age-related change in brain metabolite abnormalities in autism: a meta-analysis of proton magnetic resonance spectroscopy studies.	67	67_gaba_glutamate_cr_mrs	['gaba', 'glutamate', 'cr', 'mrs', 'glx', 'spectroscopy', 'naa', 'levels', 'cortex', 'acc']	['Imbalanced levels of excitation and inhibition (E/I) have been proposed to account for various behavioral and electrophysiological phenotypes in autism. Although proton magnetic resonance spectroscopy ((1)H-MRS) studies have been published on various metabolite levels in autism, including glutamate, the major excitatory neurotransmitter, few (1)H-MRS studies have yet been conducted the major in…	gaba - glutamate - cr - mrs - glx - spectroscopy - naa - levels - cortex - acc	0.438739	FALSE
22832774	2013	10	23	The effect of diagnosis, age, and symptom severity on cortical surface area in the cingulate cortex and insula in autism spectrum disorders.	19	19_volume_cortical_brain_matter	['volume', 'cortical', 'brain', 'matter', 'thickness', 'gray', 'gm', 'structural', 'volumes', 'surface']	['Results on grey matter (GM) structural alterations in autism spectrum disorder (ASD) are inconclusive. Moreover, little is known about age effects on brain-structure abnormalities in ASD beyond childhood. Here, we aimed to examine regional GM volumes in a large sample of children, adolescents, and adults with ASD. Magnetic resonance imaging scans were obtained in 47 male ASD subjects and 51 mat…	volume - cortical - brain - matter - thickness - gray - gm - structural - volumes - surface	0.211698	FALSE
22832856	2013	3	4	A novel blood-based biomarker for detection of autism spectrum disorders.	51	51_bdnf_serum_biomarkers_proteins	['bdnf', 'serum', 'biomarkers', 'proteins', 'levels', 'neurotrophic', 'igf', 'factor', 'protein', 'biomarker']	["The aim of our study was to illuminate the potential role of brain-derived neurotrophic factor (BDNF) in autism spectrum disorder (ASD). We measured the circulating levels of BDNF in serum and BDNF gene (Val66Met) polymorphisms, in which two indicators were then compared between ASD and normal controls. A total of 82 drug-naÃ¯ve ASD children and 82 age- and gender-matched normal controls were e…	bdnf - serum - biomarkers - proteins - levels - neurotrophic - igf - factor - protein - biomarker	1	FALSE
22833108	2013	1	16	Psychometrics and utility of Psycho-Educational Profile-Revised as a developmental quotient measure among children with the dual disability of intellectual disability and autism.	0	0_diagnostic_screening_dsm_diagnosis	['diagnostic', 'screening', 'dsm', 'diagnosis', 'autism', 'ados', 'chat', 'months', 'developmental', 'specificity']	["The Modified Checklist for Autism in Toddlers (M-CHAT) could be appropriate for universal screening for autism spectrum disorder (ASD) at 18 months and 24 months. Validation studies, however, reported differences in psychometric properties across sample populations. This meta-analysis summarized its accuracy measures and quantified their change in relation to patient and study characteristics.F…	diagnostic - screening - dsm - diagnosis - autism - ados - chat - months - developmental - specificity	0.158033	FALSE
22833194	2013	4	4	Association of a MET genetic variant with autism-associated maternal autoantibodies to fetal brain proteins and cytokine expression.	53	53_immune_maternal_mia_il	['immune', 'maternal', 'mia', 'il', 'autoantibodies', 'offspring', 'fetal', 'inflammation', 'activation', 'infection']	["Maternal health during pregnancy plays a major role in shaping health and disease risks in the offspring. The maternal immune activation hypothesis proposes that inflammatory perturbations in utero can affect fetal neurodevelopment, and evidence from human epidemiological studies supports an association between maternal inflammation during pregnancy and offspring neurodevelopmental disorders (N…	immune - maternal - mia - il - autoantibodies - offspring - fetal - inflammation - activation - infection	1	FALSE
22835639	2013	1	4	Executive function and developmental disorders: the flip side of the coin.	47	47_ef_executive_memory_cognitive	['ef', 'executive', 'memory', 'cognitive', 'working', 'function', 'adaptive', 'functioning', 'performance', 'flexibility']	['Performance on a single executive function (EF) task (e.g., a card sorting task) is often taken to represent ability on the underlying subcomponent of EF (e.g., set shifting) without accounting for the non-specific and non-executive skills employed to complete the task. This study used a manualised battery of EF tasks to derive individual task scores and latent EF scores. Seventy-nine adolescen…	ef - executive - memory - cognitive - working - function - adaptive - functioning - performance - flexibility	1	FALSE
22835685	2013	3	29	Differential brain responses to cries of infants with autistic disorder and typical development: an fMRI study.	-1	-1_asd_autism_children_disorder	['asd', 'autism', 'children', 'disorder', 'social', 'spectrum', 'study', 'disorders', 'autistic', 'individuals']	["Whether parental psychiatric disorders are associated with autism spectrum disorder (ASD) in offspring has remained inconclusive. We examined the associations of parental psychiatric disorders with ASD in offspring. This population-based case-control study used Taiwan's National Health Insurance Research Database to identify a cohort of children born from 2004 to 2017 and their parents. A total…	asd - autism - children - disorder - social - spectrum - study - disorders - autistic - individuals	0.690586	FALSE
22836322	2013	10	17	Prevalence and incidence of autism spectrum disorder in an Israeli population.	23	23_prevalence_surveillance_addm_years	['prevalence', 'surveillance', 'addm', 'years', 'incidence', 'aged', 'diagnosis', '000', 'children', 'hispanic']	["Autism spectrum disorder (ASD).2010.The Autism and Developmental Disabilities Monitoring (ADDM) Network is an active surveillance system in the United States that provides estimates of the prevalence of ASD and other characteristics among children aged 8 years whose parents or guardians live in 11 ADDM sites in the United States. ADDM surveillance is conducted in two phases. The first phase con…	prevalence - surveillance - addm - years - incidence - aged - diagnosis - 000 - children - hispanic	0.193134	FALSE
22844134	2013	1	2	Elimination of position-biased responding in individuals with autism and intellectual disabilities.	20	20_reinforcement_problem_stereotypy_reinforcer	['reinforcement', 'problem', 'stereotypy', 'reinforcer', 'behavior', 'preference', 'fct', 'rird', 'extinction', 'responding']	["This study examined behavioral persistence during extinction following continuous or intermittent reinforcement in the context of an analogue functional analysis of problem behavior. Participants were 4 children who had been diagnosed with an autism spectrum disorder and who engaged in problem behavior maintained by social reinforcement. Experimental sessions included 4 successive 5-min compone…	reinforcement - problem - stereotypy - reinforcer - behavior - preference - fct - rird - extinction - responding	0.704223	FALSE
22844136	2013	1	2	The emergence of untrained mands and tacts in children with autism.	76	76_tact_conditional_prompt_stimulus	['tact', 'conditional', 'prompt', 'stimulus', 'tacts', 'training', 'teaching', 'relations', 'discriminations', 'intraverbal']	['This study was a systematic replication and extension of Fisher, Kodak, and Moore (2007), in which a picture prompt embedded into a least-to-most prompting sequence facilitated acquisition of auditory-visual conditional discriminations. Participants were 4 children who had been diagnosed with autism; 2 had limited prior receptive skills, and 2 had more advanced receptive skills. We used a balan…	tact - conditional - prompt - stimulus - tacts - training - teaching - relations - discriminations - intraverbal	0.749212	FALSE
22844137	2013	1	2	Comparing the teaching interaction procedure to social stories for people with autism.	40	40_skills_social_peer_peers	['skills', 'social', 'peer', 'peers', 'intervention', 'adolescents', 'training', 'competence', 'students', 'school']	['Social skills intervention is an evidence-based practice for enhancing communication and interpersonal skills in individuals with autism spectrum disorder (ASD). Participation in the Program for the Education and Enrichment of Relational Skills (PEERSÂ®), a manualized social skills intervention for adolescents with ASD, is associated with improved social skills and peer interactions, as well as…	skills - social - peer - peers - intervention - adolescents - training - competence - students - school	0.175418	FALSE
22844138	2013	1	2	Further analysis of variables that affect self-control with aversive events.	20	20_reinforcement_problem_stereotypy_reinforcer	['reinforcement', 'problem', 'stereotypy', 'reinforcer', 'behavior', 'preference', 'fct', 'rird', 'extinction', 'responding']	["This study examined behavioral persistence during extinction following continuous or intermittent reinforcement in the context of an analogue functional analysis of problem behavior. Participants were 4 children who had been diagnosed with an autism spectrum disorder and who engaged in problem behavior maintained by social reinforcement. Experimental sessions included 4 successive 5-min compone…	reinforcement - problem - stereotypy - reinforcer - behavior - preference - fct - rird - extinction - responding	1	FALSE
22844144	2013	1	2	Script fading to promote unscripted bids for joint attention in children with autism.	-1	-1_asd_autism_children_disorder	['asd', 'autism', 'children', 'disorder', 'social', 'spectrum', 'study', 'disorders', 'autistic', 'individuals']	["Whether parental psychiatric disorders are associated with autism spectrum disorder (ASD) in offspring has remained inconclusive. We examined the associations of parental psychiatric disorders with ASD in offspring. This population-based case-control study used Taiwan's National Health Insurance Research Database to identify a cohort of children born from 2004 to 2017 and their parents. A total…	asd - autism - children - disorder - social - spectrum - study - disorders - autistic - individuals	0.599846	FALSE
22844148	2013	1	2	Preliminary investigation of a video-based stimulus preference assessment.	20	20_reinforcement_problem_stereotypy_reinforcer	['reinforcement', 'problem', 'stereotypy', 'reinforcer', 'behavior', 'preference', 'fct', 'rird', 'extinction', 'responding']	["This study examined behavioral persistence during extinction following continuous or intermittent reinforcement in the context of an analogue functional analysis of problem behavior. Participants were 4 children who had been diagnosed with an autism spectrum disorder and who engaged in problem behavior maintained by social reinforcement. Experimental sessions included 4 successive 5-min compone…	reinforcement - problem - stereotypy - reinforcer - behavior - preference - fct - rird - extinction - responding	1	FALSE
22844149	2013	1	2	The effects of video modeling with voiceover instruction on accurate implementation of discrete-trial instruction.	98	98_video_modeling_students_skills	['video', 'modeling', 'students', 'skills', 'instruction', 'vm', 'participants', 'design', 'heuristics', 'intervention']	['Many individuals with autism spectrum disorders (ASD) show deficits in functional living skills, leading to low independence, limited community involvement, and poor quality of life. With development of mobile devices, utilizing video modeling has become more feasible for educators to promote functional living skills of individuals with ASD.This article aims to review the single-case experiment…	video - modeling - students - skills - instruction - vm - participants - design - heuristics - intervention	0.292969	FALSE
22844150	2013	1	2	Teaching children with autism to engage in peer-directed mands using a picture exchange communication system.	-1	-1_asd_autism_children_disorder	['asd', 'autism', 'children', 'disorder', 'social', 'spectrum', 'study', 'disorders', 'autistic', 'individuals']	["Whether parental psychiatric disorders are associated with autism spectrum disorder (ASD) in offspring has remained inconclusive. We examined the associations of parental psychiatric disorders with ASD in offspring. This population-based case-control study used Taiwan's National Health Insurance Research Database to identify a cohort of children born from 2004 to 2017 and their parents. A total…	asd - autism - children - disorder - social - spectrum - study - disorders - autistic - individuals	0.503587	FALSE
22844151	2013	1	2	Comparing the effects of echoic prompts and echoic prompts plus modeled prompts on intraverbal behavior.	-1	-1_asd_autism_children_disorder	['asd', 'autism', 'children', 'disorder', 'social', 'spectrum', 'study', 'disorders', 'autistic', 'individuals']	["Whether parental psychiatric disorders are associated with autism spectrum disorder (ASD) in offspring has remained inconclusive. We examined the associations of parental psychiatric disorders with ASD in offspring. This population-based case-control study used Taiwan's National Health Insurance Research Database to identify a cohort of children born from 2004 to 2017 and their parents. A total…	asd - autism - children - disorder - social - spectrum - study - disorders - autistic - individuals	0.571452	FALSE
22844154	2013	1	2	Effects of a motivating operation manipulation on the maintenance of mands.	20	20_reinforcement_problem_stereotypy_reinforcer	['reinforcement', 'problem', 'stereotypy', 'reinforcer', 'behavior', 'preference', 'fct', 'rird', 'extinction', 'responding']	["This study examined behavioral persistence during extinction following continuous or intermittent reinforcement in the context of an analogue functional analysis of problem behavior. Participants were 4 children who had been diagnosed with an autism spectrum disorder and who engaged in problem behavior maintained by social reinforcement. Experimental sessions included 4 successive 5-min compone…	reinforcement - problem - stereotypy - reinforcer - behavior - preference - fct - rird - extinction - responding	0.308269	FALSE
22846849	2013	10	21	The development of face orienting mechanisms in infants at-risk for autism.	3	3_gaze_eye_attention_tracking	['gaze', 'eye', 'attention', 'tracking', 'visual', 'social', 'faces', 'stimuli', 'face', 'looking']	["Eye-gaze methods offer numerous advantages for studying cognitive processes in children with autism spectrum disorder (ASD), but data loss may threaten the validity and generalizability of results. Some eye-gaze systems may be more vulnerable to data loss than others, but to our knowledge, this issue has not been empirically investigated. In the current study, we asked whether automatic eye-tra…	gaze - eye - attention - tracking - visual - social - faces - stimuli - face - looking	0.388858	FALSE
22846878	2013	8	6	Communicative gesture use in infants with and without autism: a retrospective home video study.	1	1_language_children_speech_expressive	['language', 'children', 'speech', 'expressive', 'verbal', 'vocabulary', 'pragmatic', 'words', 'word', 'communication']	['Both small-scale and epidemiological longitudinal studies of early language delay indicate that most late talkers attain language scores in the average range by age 5, 6, or 7. However, late talker groups typically obtain significantly lower scores than groups with typical language histories on most language measures into adolescence. These findings support a dimensional account of language del…	language - children - speech - expressive - verbal - vocabulary - pragmatic - words - word - communication	0.0525381	FALSE
22847031	2013	4	4	Visual processing and learning disorders.	95	95_vision_refractive_visual_eye	['vision', 'refractive', 'visual', 'eye', 'ocular', 'strabismus', 'blindness', 'corneal', 'amblyopia', 'optic']	['The purpose of this study was to describe the ophthalmologic manifestations found in patients with autism spectrum disorder (ASD) and to assess their prevalence in the different types of ASD.This prospective observational study included 344 patients with ASD seen over a period of 8.5 years. They were classified into four subgroups (autism, Asperger syndrome, pervasive developmental disorders no…	vision - refractive - visual - eye - ocular - strabismus - blindness - corneal - amblyopia - optic	1	FALSE
22847297	2013	8	15	Broad autism phenotype in typically developing children predicts performance on an eye-tracking measure of joint attention.	3	3_gaze_eye_attention_tracking	['gaze', 'eye', 'attention', 'tracking', 'visual', 'social', 'faces', 'stimuli', 'face', 'looking']	["Eye-gaze methods offer numerous advantages for studying cognitive processes in children with autism spectrum disorder (ASD), but data loss may threaten the validity and generalizability of results. Some eye-gaze systems may be more vulnerable to data loss than others, but to our knowledge, this issue has not been empirically investigated. In the current study, we asked whether automatic eye-tra…	gaze - eye - attention - tracking - visual - social - faces - stimuli - face - looking	1	FALSE
22848344	2013	4	2	Elevated glutamatergic compounds in pregenual anterior cingulate in pediatric autism spectrum disorder demonstrated by 1H MRS and 1H MRSI.	67	67_gaba_glutamate_cr_mrs	['gaba', 'glutamate', 'cr', 'mrs', 'glx', 'spectroscopy', 'naa', 'levels', 'cortex', 'acc']	['Imbalanced levels of excitation and inhibition (E/I) have been proposed to account for various behavioral and electrophysiological phenotypes in autism. Although proton magnetic resonance spectroscopy ((1)H-MRS) studies have been published on various metabolite levels in autism, including glutamate, the major excitatory neurotransmitter, few (1)H-MRS studies have yet been conducted the major in…	gaba - glutamate - cr - mrs - glx - spectroscopy - naa - levels - cortex - acc	1	FALSE
22848613	2013	4	9	Identification of SCN1A and PCDH19 mutations in Chinese children with Dravet syndrome.	24	24_cacna1c_mutation_mutations_timothy	['cacna1c', 'mutation', 'mutations', 'timothy', 'gene', 'syndrome', 'qt', 'variant', 'variants', 'ts']	['Timothy syndrome is characterized by a unique combination of a prolongation of the corrected QT interval of the electrocardiogram and bilateral cutaneous syndactyly of the fingers and the toes and is caused by heterozygous mutations in CACNA1C, a gene encoding a calcium channel. After the discovery of the CACNA1C gene as the causative gene for Timothy syndrome, patients with CACNA1C mutations w…	cacna1c - mutation - mutations - timothy - gene - syndrome - qt - variant - variants - ts	0.0380232	FALSE
22849533	2013	1	16	The effects of aripiprazole on electrocardiography in children with pervasive developmental disorders.	21	21_risperidone_aripiprazole_irritability_placebo	['risperidone', 'aripiprazole', 'irritability', 'placebo', 'treatment', 'mg', 'drug', 'abc', 'effects', 'dose']	['The objective of this trial, Biomarkers in Autism of Aripiprazole and Risperidone Treatment (BAART), was to provide support and guidance for an evidence-based approach for the selection and monitoring of initial pharmacotherapy in patients with autism by assessing predictors of efficacy, tolerability, and safety. This randomized double-blind parallel-group study was conducted in three academic …	risperidone - aripiprazole - irritability - placebo - treatment - mg - drug - abc - effects - dose	0.537889	FALSE
22849541	2013	1	16	High concordance of parent and teacher attention-deficit/hyperactivity disorder ratings in medicated and unmedicated children with autism spectrum disorders.	12	12_adhd_hyperactivity_symptoms_deficit	['adhd', 'hyperactivity', 'symptoms', 'deficit', 'attention', 'comorbid', 'asd', 'disorder', 'ef', 'problems']	["This study examined the prevalence of autism spectrum disorder (ASD) symptoms in a community-based sample of children with attention-deficit/hyperactivity disorder (ADHD) and non-ADHD controls. We also examined the relationship between ASD symptoms and ADHD subtype, ADHD symptom severity and child gender. Participants were 6-10-year-old children (164 ADHD; 198 non-ADHD control) attending 43 sch…	adhd - hyperactivity - symptoms - deficit - attention - comorbid - asd - disorder - ef - problems	0.0723273	FALSE
22851209	2015	2	23	Is there a link between motor performance variability and social-communicative impairment in children with ADHD-CT: a kinematic study using an upper limb fitts' aiming task.	32	32_motor_walking_gait_coordination	['motor', 'walking', 'gait', 'coordination', 'dcd', 'gross', 'skills', 'movement', 'toe', 'stereotypies']	['Delays within the motor domain are often overlooked as an early surveillance marker for autism. The present study evaluated motor difficulties and its potential as an early predictive marker for later autism likelihood in a cohort of infants (N\xa0=\xa096) showing early behavioral signs of autism aged 9-14\u2009months. The motor domain was evaluated using the motor subscales of the Mullen Scale…	motor - walking - gait - coordination - dcd - gross - skills - movement - toe - stereotypies	1	FALSE
22851255	2013	1	29	ADHD and autism: differential diagnosis or overlapping traits? A selective review.	12	12_adhd_hyperactivity_symptoms_deficit	['adhd', 'hyperactivity', 'symptoms', 'deficit', 'attention', 'comorbid', 'asd', 'disorder', 'ef', 'problems']	["This study examined the prevalence of autism spectrum disorder (ASD) symptoms in a community-based sample of children with attention-deficit/hyperactivity disorder (ADHD) and non-ADHD controls. We also examined the relationship between ASD symptoms and ADHD subtype, ADHD symptom severity and child gender. Participants were 6-10-year-old children (164 ADHD; 198 non-ADHD control) attending 43 sch…	adhd - hyperactivity - symptoms - deficit - attention - comorbid - asd - disorder - ef - problems	0.713864	FALSE
22855372	2013	10	17	Prevalence and onset of regression within autism spectrum disorders: a meta-analytic review.	0	0_diagnostic_screening_dsm_diagnosis	['diagnostic', 'screening', 'dsm', 'diagnosis', 'autism', 'ados', 'chat', 'months', 'developmental', 'specificity']	["The Modified Checklist for Autism in Toddlers (M-CHAT) could be appropriate for universal screening for autism spectrum disorder (ASD) at 18 months and 24 months. Validation studies, however, reported differences in psychometric properties across sample populations. This meta-analysis summarized its accuracy measures and quantified their change in relation to patient and study characteristics.F…	diagnostic - screening - dsm - diagnosis - autism - ados - chat - months - developmental - specificity	0.131158	FALSE
22859698	2014	1	28	Language differences between monolingual English and bilingual English-Spanish young children with autism spectrum disorders.	1	1_language_children_speech_expressive	['language', 'children', 'speech', 'expressive', 'verbal', 'vocabulary', 'pragmatic', 'words', 'word', 'communication']	['Both small-scale and epidemiological longitudinal studies of early language delay indicate that most late talkers attain language scores in the average range by age 5, 6, or 7. However, late talker groups typically obtain significantly lower scores than groups with typical language histories on most language measures into adolescence. These findings support a dimensional account of language del…	language - children - speech - expressive - verbal - vocabulary - pragmatic - words - word - communication	1	FALSE
22859972	2013	4	11	The disappearing seasonality of autism conceptions in California.	23	23_prevalence_surveillance_addm_years	['prevalence', 'surveillance', 'addm', 'years', 'incidence', 'aged', 'diagnosis', '000', 'children', 'hispanic']	["Autism spectrum disorder (ASD).2010.The Autism and Developmental Disabilities Monitoring (ADDM) Network is an active surveillance system in the United States that provides estimates of the prevalence of ASD and other characteristics among children aged 8 years whose parents or guardians live in 11 ADDM sites in the United States. ADDM surveillance is conducted in two phases. The first phase con…	prevalence - surveillance - addm - years - incidence - aged - diagnosis - 000 - children - hispanic	1	FALSE
22860166	2013	8	23	ACS chemical neuroscience molecule spotlight on STX209 (arbaclofen).	-1	-1_asd_autism_children_disorder	['asd', 'autism', 'children', 'disorder', 'social', 'spectrum', 'study', 'disorders', 'autistic', 'individuals']	["Whether parental psychiatric disorders are associated with autism spectrum disorder (ASD) in offspring has remained inconclusive. We examined the associations of parental psychiatric disorders with ASD in offspring. This population-based case-control study used Taiwan's National Health Insurance Research Database to identify a cohort of children born from 2004 to 2017 and their parents. A total…	asd - autism - children - disorder - social - spectrum - study - disorders - autistic - individuals	0.378047	FALSE
22862778	2013	7	12	Investigating phenotypic heterogeneity in children with autism spectrum disorder: a factor mixture modeling approach.	0	0_diagnostic_screening_dsm_diagnosis	['diagnostic', 'screening', 'dsm', 'diagnosis', 'autism', 'ados', 'chat', 'months', 'developmental', 'specificity']	["The Modified Checklist for Autism in Toddlers (M-CHAT) could be appropriate for universal screening for autism spectrum disorder (ASD) at 18 months and 24 months. Validation studies, however, reported differences in psychometric properties across sample populations. This meta-analysis summarized its accuracy measures and quantified their change in relation to patient and study characteristics.F…	diagnostic - screening - dsm - diagnosis - autism - ados - chat - months - developmental - specificity	0.185054	FALSE
22865151	2013	10	17	The modality shift experiment in adults and children with high functioning autism.	112	112_multisensory_temporal_audiovisual_integration	['multisensory', 'temporal', 'audiovisual', 'integration', 'sensory', 'auditory', 'visual', 'stimuli', 'perceptual', 'msi']	['It has been recently theorized that atypical sensory processing in autism relates to difficulties in social communication. Through a series of tasks concurrently assessing multisensory temporal processes, multisensory integration and speech perception in 76 children with and without autism, we provide the first behavioral evidence of such a link. Temporal processing abilities in children with a…	multisensory - temporal - audiovisual - integration - sensory - auditory - visual - stimuli - perceptual - msi	1	FALSE
22865152	2013	10	17	Eye-hand coordination in children with high functioning autism and Asperger's disorder using a gap-overlap paradigm.	-1	-1_asd_autism_children_disorder	['asd', 'autism', 'children', 'disorder', 'social', 'spectrum', 'study', 'disorders', 'autistic', 'individuals']	["Whether parental psychiatric disorders are associated with autism spectrum disorder (ASD) in offspring has remained inconclusive. We examined the associations of parental psychiatric disorders with ASD in offspring. This population-based case-control study used Taiwan's National Health Insurance Research Database to identify a cohort of children born from 2004 to 2017 and their parents. A total…	asd - autism - children - disorder - social - spectrum - study - disorders - autistic - individuals	0.615252	FALSE
22865604	2013	1	31	Disease modeling using embryonic stem cells: MeCP2 regulates nuclear size and RNA synthesis in neurons.	-1	-1_asd_autism_children_disorder	['asd', 'autism', 'children', 'disorder', 'social', 'spectrum', 'study', 'disorders', 'autistic', 'individuals']	["Whether parental psychiatric disorders are associated with autism spectrum disorder (ASD) in offspring has remained inconclusive. We examined the associations of parental psychiatric disorders with ASD in offspring. This population-based case-control study used Taiwan's National Health Insurance Research Database to identify a cohort of children born from 2004 to 2017 and their parents. A total…	asd - autism - children - disorder - social - spectrum - study - disorders - autistic - individuals	0.689407	FALSE
22865697	2013	4	8	Atypical visuospatial processing in autism: insights from functional connectivity analysis.	-1	-1_asd_autism_children_disorder	['asd', 'autism', 'children', 'disorder', 'social', 'spectrum', 'study', 'disorders', 'autistic', 'individuals']	["Whether parental psychiatric disorders are associated with autism spectrum disorder (ASD) in offspring has remained inconclusive. We examined the associations of parental psychiatric disorders with ASD in offspring. This population-based case-control study used Taiwan's National Health Insurance Research Database to identify a cohort of children born from 2004 to 2017 and their parents. A total…	asd - autism - children - disorder - social - spectrum - study - disorders - autistic - individuals	0.156293	FALSE
22865711	2013	4	8	Using eye movements as an index of implicit face recognition in autism spectrum disorder.	-1	-1_asd_autism_children_disorder	['asd', 'autism', 'children', 'disorder', 'social', 'spectrum', 'study', 'disorders', 'autistic', 'individuals']	["Whether parental psychiatric disorders are associated with autism spectrum disorder (ASD) in offspring has remained inconclusive. We examined the associations of parental psychiatric disorders with ASD in offspring. This population-based case-control study used Taiwan's National Health Insurance Research Database to identify a cohort of children born from 2004 to 2017 and their parents. A total…	asd - autism - children - disorder - social - spectrum - study - disorders - autistic - individuals	0.0620271	FALSE
22865819	2013	4	16	Mutations of ANK3 identified by exome sequencing are associated with autism susceptibility.	-1	-1_asd_autism_children_disorder	['asd', 'autism', 'children', 'disorder', 'social', 'spectrum', 'study', 'disorders', 'autistic', 'individuals']	["Whether parental psychiatric disorders are associated with autism spectrum disorder (ASD) in offspring has remained inconclusive. We examined the associations of parental psychiatric disorders with ASD in offspring. This population-based case-control study used Taiwan's National Health Insurance Research Database to identify a cohort of children born from 2004 to 2017 and their parents. A total…	asd - autism - children - disorder - social - spectrum - study - disorders - autistic - individuals	0.223055	FALSE
22865874	2013	4	3	Loss of Maged1 results in obesity, deficits of social interactions, impaired sexual behavior and severe alteration of mature oxytocin production in the hypothalamus.	14	14_oxytocin_ot_oxt_oxtr	['oxytocin', 'ot', 'oxt', 'oxtr', 'intranasal', 'administration', 'social', 'avp', 'placebo', 'neuropeptide']	['Autism spectrum disorder is a behavioral disorder characterized by impairments in social interaction and communication together with the presence of stereotyped behaviors and restricted interests. Although highly genetic, its etiology is complex which correlates with the extensive heterogeneity found in its clinical manifestation, adding to the challenge of understanding its pathophysiology and…	oxytocin - ot - oxt - oxtr - intranasal - administration - social - avp - placebo - neuropeptide	0.153647	FALSE
22866933	2013	4	8	Marital satisfaction and life circumstances of grown children with autism across 7 years.	4	4_parenting_stress_mothers_parents	['parenting', 'stress', 'mothers', 'parents', 'coping', 'child', 'fathers', 'family', 'parental', 'support']	['The aim of the study was to investigate the perception of the family functioning in parents of children with autism spectrum disorders (ASD) with normal-range intelligence and the relationships between family functioning, parenting stress and quality of life. Dyads of parents of children with ASD without intellectual disability and parents of typically developing children (controls) completed a…	parenting - stress - mothers - parents - coping - child - fathers - family - parental - support	0.0606277	FALSE
22869036	2014	3	25	Comparative RNA editing in autistic and neurotypical cerebella.	2	2_synaptic_genes_mice_protein	['synaptic', 'genes', 'mice', 'protein', 'mouse', 'gene', 'mutations', 'cell', 'proteins', 'expression']	['Recent advances in human genetics identified genetic variants involved in causing autism spectrum disorders (ASDs). Mouse models that mimic mutations found in patients with ASD exhibit behavioral phenotypes consistent with ASD symptoms. These mouse models suggest critical biological factors of ASD etiology. Another important implication of ASD genetics is the enrichment of ASD risk genes in mol…	synaptic - genes - mice - protein - mouse - gene - mutations - cell - proteins - expression	1	FALSE
22870246	2013	2	19	Does pet arrival trigger prosocial behaviors in individuals with autism?	37	37_driving_postural_dog_drivers	['driving', 'postural', 'dog', 'drivers', 'assisted', 'dogs', 'balance', 'animal', 'control', 'therapy']	["Previous studies have shown that individuals with autism spectrum disorder (ASD) demonstrate poorer driving performance than their peers and are less likely to obtain a driver's license. This study aims to examine the relationship between driving performance and executive functioning for novice drivers, with and without ASD, using a driving simulator. Forty-four males (ages 15-23), 17 with ASD …	driving - postural - dog - drivers - assisted - dogs - balance - animal - control - therapy	1	FALSE
22870328	2013	2	19	Affective responses by adults with autism are reduced to social images but elevated to images related to circumscribed interests.	-1	-1_asd_autism_children_disorder	['asd', 'autism', 'children', 'disorder', 'social', 'spectrum', 'study', 'disorders', 'autistic', 'individuals']	["Whether parental psychiatric disorders are associated with autism spectrum disorder (ASD) in offspring has remained inconclusive. We examined the associations of parental psychiatric disorders with ASD in offspring. This population-based case-control study used Taiwan's National Health Insurance Research Database to identify a cohort of children born from 2004 to 2017 and their parents. A total…	asd - autism - children - disorder - social - spectrum - study - disorders - autistic - individuals	0.540636	FALSE
22872163	2013	3	14	Inhibin B and anti-MÃ¼llerian hormone/MÃ¼llerian-inhibiting substance may contribute to the male bias in autism.	13	13_sex_testosterone_twin_pcos	['sex', 'testosterone', 'twin', 'pcos', 'twins', 'males', 'females', 'traits', 'male', 'genetic']	['Females might possess protective mechanisms regarding autism spectrum disorder (ASD) and require a higher detrimental load, including structural brain alterations, before developing clinically relevant levels of autistic traits. This study examines sex differences in structural brain morphology in autism and autistic traits using a within-twin pair approach. Twin design inherently controls for …	sex - testosterone - twin - pcos - twins - males - females - traits - male - genetic	1	FALSE
22872214	2013	10	17	Brief report: Asperger's syndrome and sibling birth order.	5	5_birth_risk_born_95	['birth', 'risk', 'born', '95', 'ci', 'preterm', 'maternal', 'perinatal', 'age', 'factors']	['We sought to estimate the prevalence of autism spectrum disorder (ASD) in children born extremely preterm relative to the U.S. population risk of 1.5% [CDC, 2014] using the best-available diagnostic procedures and minimizing confounding with other neurodevelopmental impairments. Eight hundred and eighty nine of 966 (92%) 10-year-old children from the Extremely Low Gestational Age Newborn birth …	birth - risk - born - 95 - ci - preterm - maternal - perinatal - age - factors	0.694565	FALSE
22874006	2013	9	23	Evidence of microglial activation in autism and its possible role in brain underconnectivity.	-1	-1_asd_autism_children_disorder	['asd', 'autism', 'children', 'disorder', 'social', 'spectrum', 'study', 'disorders', 'autistic', 'individuals']	["Whether parental psychiatric disorders are associated with autism spectrum disorder (ASD) in offspring has remained inconclusive. We examined the associations of parental psychiatric disorders with ASD in offspring. This population-based case-control study used Taiwan's National Health Insurance Research Database to identify a cohort of children born from 2004 to 2017 and their parents. A total…	asd - autism - children - disorder - social - spectrum - study - disorders - autistic - individuals	0.765733	FALSE
22874395	2013	1	22	Development and evaluation of an expert system for the diagnosis of child autism.	0	0_diagnostic_screening_dsm_diagnosis	['diagnostic', 'screening', 'dsm', 'diagnosis', 'autism', 'ados', 'chat', 'months', 'developmental', 'specificity']	["The Modified Checklist for Autism in Toddlers (M-CHAT) could be appropriate for universal screening for autism spectrum disorder (ASD) at 18 months and 24 months. Validation studies, however, reported differences in psychometric properties across sample populations. This meta-analysis summarized its accuracy measures and quantified their change in relation to patient and study characteristics.F…	diagnostic - screening - dsm - diagnosis - autism - ados - chat - months - developmental - specificity	0.123145	FALSE
22874529	2013	6	26	Role of ESSENCE for preschool children with neurodevelopmental disorders.	-1	-1_asd_autism_children_disorder	['asd', 'autism', 'children', 'disorder', 'social', 'spectrum', 'study', 'disorders', 'autistic', 'individuals']	["Whether parental psychiatric disorders are associated with autism spectrum disorder (ASD) in offspring has remained inconclusive. We examined the associations of parental psychiatric disorders with ASD in offspring. This population-based case-control study used Taiwan's National Health Insurance Research Database to identify a cohort of children born from 2004 to 2017 and their parents. A total…	asd - autism - children - disorder - social - spectrum - study - disorders - autistic - individuals	0.839143	FALSE
22875726	2013	1	14	Childhood epilepsy and autism spectrum disorders: psychiatric problems, phenotypic expression, and anticonvulsants.	45	45_epilepsy_seizures_seizure_eeg	['epilepsy', 'seizures', 'seizure', 'eeg', 'epileptic', 'patients', 'epileptiform', 'abnormalities', 'focal', 'onset']	['Epilepsy is common in children with autism spectrum disorder (ASD) but little is known about how seizures impact the autism phenotype. The association between epilepsy and autism symptoms and associated maladaptive behaviors was examined in 2,645 children with ASD, of whom 139 had epilepsy, from the Simons Simplex Collection. Children with ASD and epilepsy had significantly more autism symptoms…	epilepsy - seizures - seizure - eeg - epileptic - patients - epileptiform - abnormalities - focal - onset	0.671102	FALSE
22877858	2013	1	14	[Autism and prematurity: state of the art].	5	5_birth_risk_born_95	['birth', 'risk', 'born', '95', 'ci', 'preterm', 'maternal', 'perinatal', 'age', 'factors']	['We sought to estimate the prevalence of autism spectrum disorder (ASD) in children born extremely preterm relative to the U.S. population risk of 1.5% [CDC, 2014] using the best-available diagnostic procedures and minimizing confounding with other neurodevelopmental impairments. Eight hundred and eighty nine of 966 (92%) 10-year-old children from the Extremely Low Gestational Age Newborn birth …	birth - risk - born - 95 - ci - preterm - maternal - perinatal - age - factors	0.171875	FALSE
22878512	2013	8	6	The contribution of two categories of parent verbal responsiveness to later language for toddlers and preschoolers on the autism spectrum.	1	1_language_children_speech_expressive	['language', 'children', 'speech', 'expressive', 'verbal', 'vocabulary', 'pragmatic', 'words', 'word', 'communication']	['Both small-scale and epidemiological longitudinal studies of early language delay indicate that most late talkers attain language scores in the average range by age 5, 6, or 7. However, late talker groups typically obtain significantly lower scores than groups with typical language histories on most language measures into adolescence. These findings support a dimensional account of language del…	language - children - speech - expressive - verbal - vocabulary - pragmatic - words - word - communication	0.319597	FALSE
22881991	2013	5	17	Teaching emotion recognition skills to young children with autism: a randomised controlled trial of an emotion training programme.	29	29_emotion_facial_expressions_recognition	['emotion', 'facial', 'expressions', 'recognition', 'emotions', 'emotional', 'face', 'faces', 'happy', 'angry']	["Facial mimicry as well as the accurate assessment of one's performance when judging others' emotional expressions have been suggested to inform successful emotion recognition. Differences in the integration of these two information sources might explain alterations in the perception of others' emotions in individuals with Social Anxiety Disorder and individuals on the autism spectrum. Using a n…	emotion - facial - expressions - recognition - emotions - emotional - face - faces - happy - angry	0.238591	FALSE
22883468	2013	6	26	Autism in siblings with autosomal dominant nocturnal frontal lobe epilepsy.	2	2_synaptic_genes_mice_protein	['synaptic', 'genes', 'mice', 'protein', 'mouse', 'gene', 'mutations', 'cell', 'proteins', 'expression']	['Recent advances in human genetics identified genetic variants involved in causing autism spectrum disorders (ASDs). Mouse models that mimic mutations found in patients with ASD exhibit behavioral phenotypes consistent with ASD symptoms. These mouse models suggest critical biological factors of ASD etiology. Another important implication of ASD genetics is the enrichment of ASD risk genes in mol…	synaptic - genes - mice - protein - mouse - gene - mutations - cell - proteins - expression	0.0708817	FALSE
22883737	2013	4	25	[Relationship between gene polymorphism of GABAA receptors gene and childhood autism].	-1	-1_asd_autism_children_disorder	['asd', 'autism', 'children', 'disorder', 'social', 'spectrum', 'study', 'disorders', 'autistic', 'individuals']	["Whether parental psychiatric disorders are associated with autism spectrum disorder (ASD) in offspring has remained inconclusive. We examined the associations of parental psychiatric disorders with ASD in offspring. This population-based case-control study used Taiwan's National Health Insurance Research Database to identify a cohort of children born from 2004 to 2017 and their parents. A total…	asd - autism - children - disorder - social - spectrum - study - disorders - autistic - individuals	0.683872	FALSE
22884425	2013	2	1	Vulnerability for autism traits in boys and men with an extra X chromosome (47,XXY): the mediating role of cognitive flexibility.	26	26_females_camouflaging_sex_girls	['females', 'camouflaging', 'sex', 'girls', 'males', 'gender', 'differences', 'women', 'female', 'boys']	['There is lack of consensus in the literature regarding sex differences in social outcomes for individuals on the autism spectrum. Furthermore, little research has focused on the social experiences of high school students with autism spectrum disorder (ASD) during the school day. Using a large racially/ethnically diverse sample of high school students with ASD receiving special education service…	females - camouflaging - sex - girls - males - gender - differences - women - female - boys	0.453806	FALSE
22884480	2013	5	9	Potential opposite roles of the extracellular signal-regulated kinase (ERK) pathway in autism spectrum and bipolar disorders.	2	2_synaptic_genes_mice_protein	['synaptic', 'genes', 'mice', 'protein', 'mouse', 'gene', 'mutations', 'cell', 'proteins', 'expression']	['Recent advances in human genetics identified genetic variants involved in causing autism spectrum disorders (ASDs). Mouse models that mimic mutations found in patients with ASD exhibit behavioral phenotypes consistent with ASD symptoms. These mouse models suggest critical biological factors of ASD etiology. Another important implication of ASD genetics is the enrichment of ASD risk genes in mol…	synaptic - genes - mice - protein - mouse - gene - mutations - cell - proteins - expression	1	FALSE
22884899	2013	1	17	Activating killer-cell immunoglobulin-like receptors (KIR) and their cognate HLA ligands are significantly increased in autism.	-1	-1_asd_autism_children_disorder	['asd', 'autism', 'children', 'disorder', 'social', 'spectrum', 'study', 'disorders', 'autistic', 'individuals']	["Whether parental psychiatric disorders are associated with autism spectrum disorder (ASD) in offspring has remained inconclusive. We examined the associations of parental psychiatric disorders with ASD in offspring. This population-based case-control study used Taiwan's National Health Insurance Research Database to identify a cohort of children born from 2004 to 2017 and their parents. A total…	asd - autism - children - disorder - social - spectrum - study - disorders - autistic - individuals	0.630618	FALSE
22888794	2013	4	2	Long-term oxytocin administration improves social behaviors in a girl with autistic disorder.	14	14_oxytocin_ot_oxt_oxtr	['oxytocin', 'ot', 'oxt', 'oxtr', 'intranasal', 'administration', 'social', 'avp', 'placebo', 'neuropeptide']	['Autism spectrum disorder is a behavioral disorder characterized by impairments in social interaction and communication together with the presence of stereotyped behaviors and restricted interests. Although highly genetic, its etiology is complex which correlates with the extensive heterogeneity found in its clinical manifestation, adding to the challenge of understanding its pathophysiology and…	oxytocin - ot - oxt - oxtr - intranasal - administration - social - avp - placebo - neuropeptide	1	FALSE
22890403	2013	10	17	Brief report: preliminary reliability, construct validity and standardization of the Auditory Behavior Questionnaire (ABQ) for children with autism spectrum disorders.	-1	-1_asd_autism_children_disorder	['asd', 'autism', 'children', 'disorder', 'social', 'spectrum', 'study', 'disorders', 'autistic', 'individuals']	["Whether parental psychiatric disorders are associated with autism spectrum disorder (ASD) in offspring has remained inconclusive. We examined the associations of parental psychiatric disorders with ASD in offspring. This population-based case-control study used Taiwan's National Health Insurance Research Database to identify a cohort of children born from 2004 to 2017 and their parents. A total…	asd - autism - children - disorder - social - spectrum - study - disorders - autistic - individuals	0.843095	FALSE
22890405	2013	10	17	Learning curve analyses in neurodevelopmental disorders: are children with autism spectrum disorder truly visual learners?	10	10_memory_visual_processing_perceptual	['memory', 'visual', 'processing', 'perceptual', 'task', 'motion', 'perception', 'local', 'tasks', 'global']	['What does an individual with autism spectrum disorder (ASD) perceive first: the forest or the trees? In spite of 30 years of research and influential theories like the weak central coherence (WCC) theory and the enhanced perceptual functioning (EPF) account, the interplay of local and global visual processing in ASD remains only partly understood. Research findings vary in indicating a local pr…	memory - visual - processing - perceptual - task - motion - perception - local - tasks - global	0.312547	FALSE
22890558	2013	4	8	Atypical cry acoustics in 6-month-old infants at risk for autism spectrum disorder.	-1	-1_asd_autism_children_disorder	['asd', 'autism', 'children', 'disorder', 'social', 'spectrum', 'study', 'disorders', 'autistic', 'individuals']	["Whether parental psychiatric disorders are associated with autism spectrum disorder (ASD) in offspring has remained inconclusive. We examined the associations of parental psychiatric disorders with ASD in offspring. This population-based case-control study used Taiwan's National Health Insurance Research Database to identify a cohort of children born from 2004 to 2017 and their parents. A total…	asd - autism - children - disorder - social - spectrum - study - disorders - autistic - individuals	0.853143	FALSE
22892527	2013	9	20	Prevalence of SHANK3 variants in patients with different subtypes of autism spectrum disorders.	2	2_synaptic_genes_mice_protein	['synaptic', 'genes', 'mice', 'protein', 'mouse', 'gene', 'mutations', 'cell', 'proteins', 'expression']	['Recent advances in human genetics identified genetic variants involved in causing autism spectrum disorders (ASDs). Mouse models that mimic mutations found in patients with ASD exhibit behavioral phenotypes consistent with ASD symptoms. These mouse models suggest critical biological factors of ASD etiology. Another important implication of ASD genetics is the enrichment of ASD risk genes in mol…	synaptic - genes - mice - protein - mouse - gene - mutations - cell - proteins - expression	0.148579	FALSE
22892891	2014	6	16	Psychopharmacology of autism spectrum disorders: a selective review.	70	70_psychotropic_antipsychotic_medication_antipsychotics	['psychotropic', 'antipsychotic', 'medication', 'antipsychotics', 'prescribed', 'medications', 'prescription', 'use', 'polypharmacy', 'drugs']	['The goal of this study was to examine rates of psychotropic medication use and identify associated child and family characteristics among children and adolescents with autism spectrum disorder (ASD) enrolled in an autism registry maintained by the Autism Treatment Network (ATN).The sample, derived from the ATN registry, consists of 2853 children aged 2 to 17 years with diagnoses of ASD supporte…	psychotropic - antipsychotic - medication - antipsychotics - prescribed - medications - prescription - use - polypharmacy - drugs	1	FALSE
22892897	2013	5	17	Full-spectrum parenting.	0	0_diagnostic_screening_dsm_diagnosis	['diagnostic', 'screening', 'dsm', 'diagnosis', 'autism', 'ados', 'chat', 'months', 'developmental', 'specificity']	["The Modified Checklist for Autism in Toddlers (M-CHAT) could be appropriate for universal screening for autism spectrum disorder (ASD) at 18 months and 24 months. Validation studies, however, reported differences in psychometric properties across sample populations. This meta-analysis summarized its accuracy measures and quantified their change in relation to patient and study characteristics.F…	diagnostic - screening - dsm - diagnosis - autism - ados - chat - months - developmental - specificity	0.100667	FALSE
22895777	2013	10	17	Emotional and behavioural problems in children with autism spectrum disorder.	-1	-1_asd_autism_children_disorder	['asd', 'autism', 'children', 'disorder', 'social', 'spectrum', 'study', 'disorders', 'autistic', 'individuals']	["Whether parental psychiatric disorders are associated with autism spectrum disorder (ASD) in offspring has remained inconclusive. We examined the associations of parental psychiatric disorders with ASD in offspring. This population-based case-control study used Taiwan's National Health Insurance Research Database to identify a cohort of children born from 2004 to 2017 and their parents. A total…	asd - autism - children - disorder - social - spectrum - study - disorders - autistic - individuals	0.816504	FALSE
22897818	2013	5	15	ICF-CY based assessment tool for children with autism.	-1	-1_asd_autism_children_disorder	['asd', 'autism', 'children', 'disorder', 'social', 'spectrum', 'study', 'disorders', 'autistic', 'individuals']	["Whether parental psychiatric disorders are associated with autism spectrum disorder (ASD) in offspring has remained inconclusive. We examined the associations of parental psychiatric disorders with ASD in offspring. This population-based case-control study used Taiwan's National Health Insurance Research Database to identify a cohort of children born from 2004 to 2017 and their parents. A total…	asd - autism - children - disorder - social - spectrum - study - disorders - autistic - individuals	0.856922	FALSE
22898564	2013	6	17	Reduced serum concentrations of 25-hydroxy vitamin D in children with autism: relation to autoimmunity.	68	68_vitamin_oh_25_serum	['vitamin', 'oh', '25', 'serum', 'levels', 'deficiency', 'd3', 'supplementation', 'vdr', 'ng']	['This study aimed to examine the correlation between polymorphisms in vitamin D receptor (VDR) gene and serum vitamin D, and to determine their role in predicting childhood Autism Spectrum Disorder (ASD).Children with ASD and age- and gender- matched healthy controls were recruited from the Chinese Han population. Their serum 25(OH) vitamin D was measured using competitive chemiluminescent immun…	vitamin - oh - 25 - serum - levels - deficiency - d3 - supplementation - vdr - ng	1	FALSE
22899798	2014	1	28	Global cerebral and regional multimodal neuroimaging markers of the neurobiology of autism: development and cognition.	19	19_volume_cortical_brain_matter	['volume', 'cortical', 'brain', 'matter', 'thickness', 'gray', 'gm', 'structural', 'volumes', 'surface']	['Results on grey matter (GM) structural alterations in autism spectrum disorder (ASD) are inconclusive. Moreover, little is known about age effects on brain-structure abnormalities in ASD beyond childhood. Here, we aimed to examine regional GM volumes in a large sample of children, adolescents, and adults with ASD. Magnetic resonance imaging scans were obtained in 47 male ASD subjects and 51 mat…	volume - cortical - brain - matter - thickness - gray - gm - structural - volumes - surface	0.423058	FALSE
22900501	2013	9	16	The impact of mutual support on Iranian parents of children with an autism spectrum disorder: a longitudinal study.	-1	-1_asd_autism_children_disorder	['asd', 'autism', 'children', 'disorder', 'social', 'spectrum', 'study', 'disorders', 'autistic', 'individuals']	["Whether parental psychiatric disorders are associated with autism spectrum disorder (ASD) in offspring has remained inconclusive. We examined the associations of parental psychiatric disorders with ASD in offspring. This population-based case-control study used Taiwan's National Health Insurance Research Database to identify a cohort of children born from 2004 to 2017 and their parents. A total…	asd - autism - children - disorder - social - spectrum - study - disorders - autistic - individuals	0.193244	FALSE
22901078	2014	4	21	Remembering the past and imagining the future in autism spectrum disorder.	10	10_memory_visual_processing_perceptual	['memory', 'visual', 'processing', 'perceptual', 'task', 'motion', 'perception', 'local', 'tasks', 'global']	['What does an individual with autism spectrum disorder (ASD) perceive first: the forest or the trees? In spite of 30 years of research and influential theories like the weak central coherence (WCC) theory and the enhanced perceptual functioning (EPF) account, the interplay of local and global visual processing in ASD remains only partly understood. Research findings vary in indicating a local pr…	memory - visual - processing - perceptual - task - motion - perception - local - tasks - global	0.097635	FALSE
22901951	2013	1	24	Minor fetal sonographic findings in autism spectrum disorder.	5	5_birth_risk_born_95	['birth', 'risk', 'born', '95', 'ci', 'preterm', 'maternal', 'perinatal', 'age', 'factors']	['We sought to estimate the prevalence of autism spectrum disorder (ASD) in children born extremely preterm relative to the U.S. population risk of 1.5% [CDC, 2014] using the best-available diagnostic procedures and minimizing confounding with other neurodevelopmental impairments. Eight hundred and eighty nine of 966 (92%) 10-year-old children from the Extremely Low Gestational Age Newborn birth …	birth - risk - born - 95 - ci - preterm - maternal - perinatal - age - factors	0.045088	FALSE
22904114	2014	1	30	Communicating a diagnosis of Autism Spectrum Disorder - a qualitative study of parents' experiences.	7	7_parents_services_care_families	['parents', 'services', 'care', 'families', 'service', 'child', 'needs', 'experiences', 'latino', 'family']	["Autism spectrum disorders (ASD) significantly impact lives of affected individuals and their families. They confront daunting challenges and multiple demands in their daily life, when compared to parents of children with other disabilities or parents of typically developing children.Participants completed The Caregiver Needs Survey, the survey intended for parents or primary caregivers of child…	parents - services - care - families - service - child - needs - experiences - latino - family	1	FALSE
22905987	2013	7	12	Diagnosis of autism spectrum disorders in 2-year-olds: a study of community practice.	-1	-1_asd_autism_children_disorder	['asd', 'autism', 'children', 'disorder', 'social', 'spectrum', 'study', 'disorders', 'autistic', 'individuals']	["Whether parental psychiatric disorders are associated with autism spectrum disorder (ASD) in offspring has remained inconclusive. We examined the associations of parental psychiatric disorders with ASD in offspring. This population-based case-control study used Taiwan's National Health Insurance Research Database to identify a cohort of children born from 2004 to 2017 and their parents. A total…	asd - autism - children - disorder - social - spectrum - study - disorders - autistic - individuals	0.799827	FALSE
22906000	2013	11	15	Why we need cognitive explanations of autism.	85	85_tom_mind_theory_ef	['tom', 'mind', 'theory', 'ef', 'verbal', 'social', 'comprehension', 'children', 'cognitive', 'ability']	["'Theory of Mind' (ToM) is the ability to attribute mental states to others to make sense of their behaviour. ToM research has informed understanding of (a)typical social behaviour, including the symptoms of autism spectrum disorder (ASD). This began with research on ToM in autistic children and there has been a noticeable increase in the study of ToM in autistic adults. However, methodological …	tom - mind - theory - ef - verbal - social - comprehension - children - cognitive - ability	1	FALSE
22906515	2013	4	23	Diffusion tensor imaging in young children with autism: biological effects and potential confounds.	48	48_matter_white_diffusion_tracts	['matter', 'white', 'diffusion', 'tracts', 'diffusivity', 'fa', 'anisotropy', 'tract', 'fractional', 'dti']	['Abnormal functional connections are associated with impaired white matter tract integrity in the brain. Diffusion tensor imaging (DTI) is a promising method for evaluating white matter integrity in infants and young children. This work aims to shed light on the location and nature of the decrease in white matter integrity.Here, the results of 19 studies have been presented that investigated whi…	matter - white - diffusion - tracts - diffusivity - fa - anisotropy - tract - fractional - dti	1	FALSE
22909152	2013	2	1	A case report of Chinese brothers with inherited MECP2-containing duplication: autism and intellectual disability, but not seizures or respiratory infections.	41	41_variants_sequencing_exome_variant	['variants', 'sequencing', 'exome', 'variant', 'pathogenic', 'delay', 'intellectual', 'patients', 'disability', 'features']	['gene have been identified as a cause of a unique neurodevelopmental disorder with variable combination of global developmental delay or isolated speech delay, intellectual disability, autistic features, and seizures.-related neurodevelopmental disorder. Articles were identified through search engines using appropriate search terms.Along with the presented 2 cases, 40 cases were analyzed. Out of…	variants - sequencing - exome - variant - pathogenic - delay - intellectual - patients - disability - features	0.322038	FALSE
22909153	2013	3	14	A comparison of diagnostic criteria on the Autism Spectrum Disorder Observation for Children (ASD-OC).	0	0_diagnostic_screening_dsm_diagnosis	['diagnostic', 'screening', 'dsm', 'diagnosis', 'autism', 'ados', 'chat', 'months', 'developmental', 'specificity']	["The Modified Checklist for Autism in Toddlers (M-CHAT) could be appropriate for universal screening for autism spectrum disorder (ASD) at 18 months and 24 months. Validation studies, however, reported differences in psychometric properties across sample populations. This meta-analysis summarized its accuracy measures and quantified their change in relation to patient and study characteristics.F…	diagnostic - screening - dsm - diagnosis - autism - ados - chat - months - developmental - specificity	1	FALSE
22909395	2013	4	8	Severe mood problems in adolescents with autism spectrum disorder.	93	93_depression_depressive_symptoms_depressed	['depression', 'depressive', 'symptoms', 'depressed', 'rumination', 'mood', 'autistic', 'adults', 'self', 'job']	['In adults with autism spectrum disorder, co-occurring psychiatric conditions are prevalent, and depression is one of the most common co-occurring disorders. This study examined the relationship between depression and cognitive ability, autism symptom severity, and self-reported social impairments in autism spectrum disorder. A total of 33 adults with autism spectrum disorder and 28 adults with …	depression - depressive - symptoms - depressed - rumination - mood - autistic - adults - self - job	1	FALSE
22911883	2013	4	10	Maternal and fetal antibrain antibodies in development and disease.	53	53_immune_maternal_mia_il	['immune', 'maternal', 'mia', 'il', 'autoantibodies', 'offspring', 'fetal', 'inflammation', 'activation', 'infection']	["Maternal health during pregnancy plays a major role in shaping health and disease risks in the offspring. The maternal immune activation hypothesis proposes that inflammatory perturbations in utero can affect fetal neurodevelopment, and evidence from human epidemiological studies supports an association between maternal inflammation during pregnancy and offspring neurodevelopmental disorders (N…	immune - maternal - mia - il - autoantibodies - offspring - fetal - inflammation - activation - infection	1	FALSE
22911893	2013	4	4	Autistic disorder phenotype associated to a complex 15q intrachromosomal rearrangement.	16	16_deletion_duplication_16p11_22q11	['deletion', 'duplication', '16p11', '22q11', 'deletions', 'syndrome', 'region', 'microdeletion', 'carriers', 'duplications']	['Copy number variants (CNVs) are genetic rearrangements, such as deletions and duplications, which result in a deviation from the normal number of copies of a given gene segment. CNVs are implicated in many neuropsychiatric disorders. Deletions of the human chromosomal region 16p11.2 are one of the most common genetic linkages to autism spectrum disorders (ASD). However, ASD is not the only pres…	deletion - duplication - 16p11 - 22q11 - deletions - syndrome - region - microdeletion - carriers - duplications	0.583253	FALSE
22912506	2017	2	14	Gender Profiles of Behavioral Attention in Children With Autism Spectrum Disorder.	26	26_females_camouflaging_sex_girls	['females', 'camouflaging', 'sex', 'girls', 'males', 'gender', 'differences', 'women', 'female', 'boys']	['There is lack of consensus in the literature regarding sex differences in social outcomes for individuals on the autism spectrum. Furthermore, little research has focused on the social experiences of high school students with autism spectrum disorder (ASD) during the school day. Using a large racially/ethnically diverse sample of high school students with ASD receiving special education service…	females - camouflaging - sex - girls - males - gender - differences - women - female - boys	1	FALSE
22912831	2013	5	1	Functional alterations in neural substrates of geometric reasoning in adults with high-functioning autism.	-1	-1_asd_autism_children_disorder	['asd', 'autism', 'children', 'disorder', 'social', 'spectrum', 'study', 'disorders', 'autistic', 'individuals']	["Whether parental psychiatric disorders are associated with autism spectrum disorder (ASD) in offspring has remained inconclusive. We examined the associations of parental psychiatric disorders with ASD in offspring. This population-based case-control study used Taiwan's National Health Insurance Research Database to identify a cohort of children born from 2004 to 2017 and their parents. A total…	asd - autism - children - disorder - social - spectrum - study - disorders - autistic - individuals	0.161465	FALSE
22914776	2014	4	3	Using the Child Behavior Checklist and the Teacher's Report Form for identification of children with autism spectrum disorders.	0	0_diagnostic_screening_dsm_diagnosis	['diagnostic', 'screening', 'dsm', 'diagnosis', 'autism', 'ados', 'chat', 'months', 'developmental', 'specificity']	["The Modified Checklist for Autism in Toddlers (M-CHAT) could be appropriate for universal screening for autism spectrum disorder (ASD) at 18 months and 24 months. Validation studies, however, reported differences in psychometric properties across sample populations. This meta-analysis summarized its accuracy measures and quantified their change in relation to patient and study characteristics.F…	diagnostic - screening - dsm - diagnosis - autism - ados - chat - months - developmental - specificity	0.370318	FALSE
22914777	2014	6	16	Assessing adolescent social competence using the Social Responsiveness Scale: should we ask both parents or will just one do?	0	0_diagnostic_screening_dsm_diagnosis	['diagnostic', 'screening', 'dsm', 'diagnosis', 'autism', 'ados', 'chat', 'months', 'developmental', 'specificity']	["The Modified Checklist for Autism in Toddlers (M-CHAT) could be appropriate for universal screening for autism spectrum disorder (ASD) at 18 months and 24 months. Validation studies, however, reported differences in psychometric properties across sample populations. This meta-analysis summarized its accuracy measures and quantified their change in relation to patient and study characteristics.F…	diagnostic - screening - dsm - diagnosis - autism - ados - chat - months - developmental - specificity	0.121055	FALSE
22917205	2013	1	16	Trajectories of early brain volume development in fragile X syndrome and autism.	-1	-1_asd_autism_children_disorder	['asd', 'autism', 'children', 'disorder', 'social', 'spectrum', 'study', 'disorders', 'autistic', 'individuals']	["Whether parental psychiatric disorders are associated with autism spectrum disorder (ASD) in offspring has remained inconclusive. We examined the associations of parental psychiatric disorders with ASD in offspring. This population-based case-control study used Taiwan's National Health Insurance Research Database to identify a cohort of children born from 2004 to 2017 and their parents. A total…	asd - autism - children - disorder - social - spectrum - study - disorders - autistic - individuals	0.623547	FALSE
22917206	2013	1	16	Blood-based gene expression signatures of infants and toddlers with autism.	17	17_methylation_epigenetic_dna_genes	['methylation', 'epigenetic', 'dna', 'genes', 'gene', 'expression', 'chromatin', 'serotonin', 'histone', 'genome']	['The prevalence of autism spectrum disorder (ASD) has been increasing steadily over the last 20 years; however, the molecular basis for the majority of ASD cases remains unknown. Recent advances in next-generation sequencing and detection of DNA modifications have made methylation-dependent regulation of transcription an attractive hypothesis for being a causative factor in ASD etiology. Evidenc…	methylation - epigenetic - dna - genes - gene - expression - chromatin - serotonin - histone - genome	0.0490705	FALSE
22917843	2014	6	16	The association of quality of social relations, symptom severity and intelligence with anxiety in children with autism spectrum disorders.	30	30_anxiety_symptoms_social_parent	['anxiety', 'symptoms', 'social', 'parent', 'youth', 'sad', 'children', 'asd', 'uncertainty', 'iu']	['Children with Autism Spectrum Disorder are vulnerable to anxiety. Repetitive behaviours are a core feature of Autism Spectrum Disorder (ASD) and have been associated anxiety. This study examined repetitive behaviours and anxiety in two groups of children with autism spectrum disorder, those with high anxiety and those with lower levels of anxiety. Children with high anxiety had more repetitive …	anxiety - symptoms - social - parent - youth - sad - children - asd - uncertainty - iu	0.260079	FALSE
22917844	2014	6	16	Priorities for autism spectrum disorder risk communication and ethics.	104	104_testing_genetic_genetics_parents	['testing', 'genetic', 'genetics', 'parents', 'families', 'research', 'knowledge', 'pgt', 'services', 'ethical']	['This study examined the experiences of Autism Spectrum Disorder (ASD) genetic testing among parents of children with ASD. A nationwide sample of 552 parents of children with ASD completed an online survey. Nearly one-quarter (22.5%) of the parents reported that their affected children had undergone ASD genetic testing. The testing utilization was associated with awareness of ASD genetic testing…	testing - genetic - genetics - parents - families - research - knowledge - pgt - services - ethical	1	FALSE
22918709	2016	8	4	Motion and pattern cortical potentials in adults with high-functioning autism spectrum disorder.	10	10_memory_visual_processing_perceptual	['memory', 'visual', 'processing', 'perceptual', 'task', 'motion', 'perception', 'local', 'tasks', 'global']	['What does an individual with autism spectrum disorder (ASD) perceive first: the forest or the trees? In spite of 30 years of research and influential theories like the weak central coherence (WCC) theory and the enhanced perceptual functioning (EPF) account, the interplay of local and global visual processing in ASD remains only partly understood. Research findings vary in indicating a local pr…	memory - visual - processing - perceptual - task - motion - perception - local - tasks - global	0.257509	FALSE
22918860	2013	10	17	Emotional responses to odors in children with high-functioning autism: autonomic arousal, facial behavior and self-report.	29	29_emotion_facial_expressions_recognition	['emotion', 'facial', 'expressions', 'recognition', 'emotions', 'emotional', 'face', 'faces', 'happy', 'angry']	["Facial mimicry as well as the accurate assessment of one's performance when judging others' emotional expressions have been suggested to inform successful emotion recognition. Differences in the integration of these two information sources might explain alterations in the perception of others' emotions in individuals with Social Anxiety Disorder and individuals on the autism spectrum. Using a n…	emotion - facial - expressions - recognition - emotions - emotional - face - faces - happy - angry	1	FALSE
22920657	2013	2	12	The health care experiences of the preschool child with autism.	7	7_parents_services_care_families	['parents', 'services', 'care', 'families', 'service', 'child', 'needs', 'experiences', 'latino', 'family']	["Autism spectrum disorders (ASD) significantly impact lives of affected individuals and their families. They confront daunting challenges and multiple demands in their daily life, when compared to parents of children with other disabilities or parents of typically developing children.Participants completed The Caregiver Needs Survey, the survey intended for parents or primary caregivers of child…	parents - services - care - families - service - child - needs - experiences - latino - family	1	FALSE
22921138	2013	1	18	Assessing the health, functional characteristics, and health needs of youth attending a noncategorical transition support program.	-1	-1_asd_autism_children_disorder	['asd', 'autism', 'children', 'disorder', 'social', 'spectrum', 'study', 'disorders', 'autistic', 'individuals']	["Whether parental psychiatric disorders are associated with autism spectrum disorder (ASD) in offspring has remained inconclusive. We examined the associations of parental psychiatric disorders with ASD in offspring. This population-based case-control study used Taiwan's National Health Insurance Research Database to identify a cohort of children born from 2004 to 2017 and their parents. A total…	asd - autism - children - disorder - social - spectrum - study - disorders - autistic - individuals	0.414534	FALSE
22923038	2013	10	17	Fascination and isolation: a grounded theory exploration of unusual sensory experiences in adults with Asperger syndrome.	-1	-1_asd_autism_children_disorder	['asd', 'autism', 'children', 'disorder', 'social', 'spectrum', 'study', 'disorders', 'autistic', 'individuals']	["Whether parental psychiatric disorders are associated with autism spectrum disorder (ASD) in offspring has remained inconclusive. We examined the associations of parental psychiatric disorders with ASD in offspring. This population-based case-control study used Taiwan's National Health Insurance Research Database to identify a cohort of children born from 2004 to 2017 and their parents. A total…	asd - autism - children - disorder - social - spectrum - study - disorders - autistic - individuals	0.834476	FALSE
22923066	2013	6	17	Head circumference and height abnormalities in autism revisited: the role of pre- and perinatal risk factors.	-1	-1_asd_autism_children_disorder	['asd', 'autism', 'children', 'disorder', 'social', 'spectrum', 'study', 'disorders', 'autistic', 'individuals']	["Whether parental psychiatric disorders are associated with autism spectrum disorder (ASD) in offspring has remained inconclusive. We examined the associations of parental psychiatric disorders with ASD in offspring. This population-based case-control study used Taiwan's National Health Insurance Research Database to identify a cohort of children born from 2004 to 2017 and their parents. A total…	asd - autism - children - disorder - social - spectrum - study - disorders - autistic - individuals	0.967393	FALSE
22923209	2013	7	15	Links between multisensory processing and autism.	112	112_multisensory_temporal_audiovisual_integration	['multisensory', 'temporal', 'audiovisual', 'integration', 'sensory', 'auditory', 'visual', 'stimuli', 'perceptual', 'msi']	['It has been recently theorized that atypical sensory processing in autism relates to difficulties in social communication. Through a series of tasks concurrently assessing multisensory temporal processes, multisensory integration and speech perception in 76 children with and without autism, we provide the first behavioral evidence of such a link. Temporal processing abilities in children with a…	multisensory - temporal - audiovisual - integration - sensory - auditory - visual - stimuli - perceptual - msi	1	TRUE
22924341	2013	2	19	The mirror mechanism and its potential role in autism spectrum disorder.	35	35_imitation_motor_mirror_action	['imitation', 'motor', 'mirror', 'action', 'actions', 'movement', 'interpersonal', 'movements', 'synchrony', 'hand']	['Imitation is a potentially crucial aspect of social cognitive development. Although deficits in imitation ability have been widely demonstrated in autism spectrum disorder (ASD), the specificity and significance of the findings is unclear, due largely to methodological limitations. We developed a novel assessment of imitation ability, using objective movement parameters (path length and action …	imitation - motor - mirror - action - actions - movement - interpersonal - movements - synchrony - hand	0.219056	FALSE
22926922	2013	10	17	Can bronchoscopic airway anatomy be an indicator of autism?	-1	-1_asd_autism_children_disorder	['asd', 'autism', 'children', 'disorder', 'social', 'spectrum', 'study', 'disorders', 'autistic', 'individuals']	["Whether parental psychiatric disorders are associated with autism spectrum disorder (ASD) in offspring has remained inconclusive. We examined the associations of parental psychiatric disorders with ASD in offspring. This population-based case-control study used Taiwan's National Health Insurance Research Database to identify a cohort of children born from 2004 to 2017 and their parents. A total…	asd - autism - children - disorder - social - spectrum - study - disorders - autistic - individuals	0.802484	FALSE
22928716	2013	5	31	A first national survey of knowledge, attitudes and behaviours towards schizophrenia, bipolar disorders and autism in France.	55	55_stigma_attitudes_affiliate_people	['stigma', 'attitudes', 'affiliate', 'people', 'knowledge', 'self', 'autistic', 'esteem', 'newspapers', 'public']	["Stigma affects not only children diagnosed with autism spectrum disorder (ASD) themselves, but also people connected with them (i.e., parents, siblings). The capacity of parents to provide care is affected by the stigma they perceive. This meta-synthesis encompasses the experiences of affiliate stigma among parents of children with ASD.Articles were limited to the English language, those report…	stigma - attitudes - affiliate - people - knowledge - self - autistic - esteem - newspapers - public	0.38968	FALSE
22928858	2015	11	30	Family history interview of a broad phenotype in specific language impairment and matched controls.	1	1_language_children_speech_expressive	['language', 'children', 'speech', 'expressive', 'verbal', 'vocabulary', 'pragmatic', 'words', 'word', 'communication']	['Both small-scale and epidemiological longitudinal studies of early language delay indicate that most late talkers attain language scores in the average range by age 5, 6, or 7. However, late talker groups typically obtain significantly lower scores than groups with typical language histories on most language measures into adolescence. These findings support a dimensional account of language del…	language - children - speech - expressive - verbal - vocabulary - pragmatic - words - word - communication	0.444335	FALSE
22932768	2013	10	17	Inhibition of return in response to eye gaze and peripheral cues in young people with Asperger's syndrome.	3	3_gaze_eye_attention_tracking	['gaze', 'eye', 'attention', 'tracking', 'visual', 'social', 'faces', 'stimuli', 'face', 'looking']	["Eye-gaze methods offer numerous advantages for studying cognitive processes in children with autism spectrum disorder (ASD), but data loss may threaten the validity and generalizability of results. Some eye-gaze systems may be more vulnerable to data loss than others, but to our knowledge, this issue has not been empirically investigated. In the current study, we asked whether automatic eye-tra…	gaze - eye - attention - tracking - visual - social - faces - stimuli - face - looking	1	FALSE
22933354	2013	4	8	Children with autism show reduced somatosensory response: an MEG study.	33	33_sensory_tactile_touch_processing	['sensory', 'tactile', 'touch', 'processing', 'reactivity', 'features', 'seeking', 'sensitivity', 'profile', 'ssp']	['This study examines whether sensory differences can be used to classify meaningful subgroups of children with autism spectrum disorder (ASD). Caregivers of children with ASD aged 2-10 years (n\u2009=\u2009228) completed the Short Sensory Profile. Model-based cluster analysis was used to extract sensory subtypes. The relationship of these subtypes to age, gender, autism symptom severity, and non…	sensory - tactile - touch - processing - reactivity - features - seeking - sensitivity - profile - ssp	0.0182134	FALSE
22934903	2013	1	9	Impact of the Learn to Play program on play, social competence and language for children aged 5-8 years who attend a specialist school.	115	115_play_pretend_intervention_peer	['play', 'pretend', 'intervention', 'peer', 'peers', 'skills', 'communication', 'children', 'parental', 'parents']	["Although the literature on parent-child interactions in young children with autism has examined dyadic style, synchrony, and sustained engagement, the examination of parental skill in sustaining and developing play skills themselves has not been targeted. This study examined the extent to which parents of young children with autism match and scaffold their child's play. Sixteen dyads of parents…	play - pretend - intervention - peer - peers - skills - communication - children - parental - parents	1	FALSE
22935271	2013	5	22	The convergent validity of the Questions About Behavioral Function scale and functional analysis for problem behavior displayed by individuals with autism spectrum disorder.	20	20_reinforcement_problem_stereotypy_reinforcer	['reinforcement', 'problem', 'stereotypy', 'reinforcer', 'behavior', 'preference', 'fct', 'rird', 'extinction', 'responding']	["This study examined behavioral persistence during extinction following continuous or intermittent reinforcement in the context of an analogue functional analysis of problem behavior. Participants were 4 children who had been diagnosed with an autism spectrum disorder and who engaged in problem behavior maintained by social reinforcement. Experimental sessions included 4 successive 5-min compone…	reinforcement - problem - stereotypy - reinforcer - behavior - preference - fct - rird - extinction - responding	0.0802975	FALSE
22936973	2013	4	25	Measuring the maturity of the fast-spiking interneuron transcriptional program in autism, schizophrenia, and bipolar disorder.	-1	-1_asd_autism_children_disorder	['asd', 'autism', 'children', 'disorder', 'social', 'spectrum', 'study', 'disorders', 'autistic', 'individuals']	["Whether parental psychiatric disorders are associated with autism spectrum disorder (ASD) in offspring has remained inconclusive. We examined the associations of parental psychiatric disorders with ASD in offspring. This population-based case-control study used Taiwan's National Health Insurance Research Database to identify a cohort of children born from 2004 to 2017 and their parents. A total…	asd - autism - children - disorder - social - spectrum - study - disorders - autistic - individuals	0.708036	FALSE
22940000	2013	9	9	Adenosine and autism: a spectrum of opportunities.	-1	-1_asd_autism_children_disorder	['asd', 'autism', 'children', 'disorder', 'social', 'spectrum', 'study', 'disorders', 'autistic', 'individuals']	["Whether parental psychiatric disorders are associated with autism spectrum disorder (ASD) in offspring has remained inconclusive. We examined the associations of parental psychiatric disorders with ASD in offspring. This population-based case-control study used Taiwan's National Health Insurance Research Database to identify a cohort of children born from 2004 to 2017 and their parents. A total…	asd - autism - children - disorder - social - spectrum - study - disorders - autistic - individuals	0.631821	FALSE
22940155	2013	5	22	Implicit attitudes towards children with autism versus normally developing children as predictors of professional burnout and psychopathology.	-1	-1_asd_autism_children_disorder	['asd', 'autism', 'children', 'disorder', 'social', 'spectrum', 'study', 'disorders', 'autistic', 'individuals']	["Whether parental psychiatric disorders are associated with autism spectrum disorder (ASD) in offspring has remained inconclusive. We examined the associations of parental psychiatric disorders with ASD in offspring. This population-based case-control study used Taiwan's National Health Insurance Research Database to identify a cohort of children born from 2004 to 2017 and their parents. A total…	asd - autism - children - disorder - social - spectrum - study - disorders - autistic - individuals	0.395468	FALSE
22940159	2013	5	22	Psychological adjustment and levels of self esteem in children with visual-motor integration difficulties influences the results of a randomized intervention trial.	8	8_intervention_parent_interventions_training	['intervention', 'parent', 'interventions', 'training', 'early', 'parents', 'program', 'eibi', 'esdm', 'child']	['Although data from parent-implemented Naturalistic Developmental Behavioral Interventions have shown positive effects on decreasing core symptoms of autism, there has been limited examination of the effectiveness of Naturalistic Developmental Behavioral Interventions in community settings. In addition, parent perspectives of their involvement in parent-implemented early intervention programs ha…	intervention - parent - interventions - training - early - parents - program - eibi - esdm - child	1	FALSE
22940168	2013	5	22	Using iPods(Â®) and iPads(Â®) in teaching programs for individuals with developmental disabilities: a systematic review.	-1	-1_asd_autism_children_disorder	['asd', 'autism', 'children', 'disorder', 'social', 'spectrum', 'study', 'disorders', 'autistic', 'individuals']	["Whether parental psychiatric disorders are associated with autism spectrum disorder (ASD) in offspring has remained inconclusive. We examined the associations of parental psychiatric disorders with ASD in offspring. This population-based case-control study used Taiwan's National Health Insurance Research Database to identify a cohort of children born from 2004 to 2017 and their parents. A total…	asd - autism - children - disorder - social - spectrum - study - disorders - autistic - individuals	0.508631	FALSE
22940852	2017	2	14	Attention Deficits in Children With Combined Autism and ADHD: A CPT Study.	12	12_adhd_hyperactivity_symptoms_deficit	['adhd', 'hyperactivity', 'symptoms', 'deficit', 'attention', 'comorbid', 'asd', 'disorder', 'ef', 'problems']	["This study examined the prevalence of autism spectrum disorder (ASD) symptoms in a community-based sample of children with attention-deficit/hyperactivity disorder (ADHD) and non-ADHD controls. We also examined the relationship between ASD symptoms and ADHD subtype, ADHD symptom severity and child gender. Participants were 6-10-year-old children (164 ADHD; 198 non-ADHD control) attending 43 sch…	adhd - hyperactivity - symptoms - deficit - attention - comorbid - asd - disorder - ef - problems	0.0222123	FALSE
22944257	2013	5	22	Assessment of the relationship between diagnoses of ASD and caregiver symptom endorsement in adults diagnosed with intellectual disability.	-1	-1_asd_autism_children_disorder	['asd', 'autism', 'children', 'disorder', 'social', 'spectrum', 'study', 'disorders', 'autistic', 'individuals']	["Whether parental psychiatric disorders are associated with autism spectrum disorder (ASD) in offspring has remained inconclusive. We examined the associations of parental psychiatric disorders with ASD in offspring. This population-based case-control study used Taiwan's National Health Insurance Research Database to identify a cohort of children born from 2004 to 2017 and their parents. A total…	asd - autism - children - disorder - social - spectrum - study - disorders - autistic - individuals	0.810135	FALSE
22945284	2013	2	12	Bullying involvement and autism spectrum disorders: prevalence and correlates of bullying involvement among adolescents with an autism spectrum disorder.	99	99_bullying_victimization_bullied_school	['bullying', 'victimization', 'bullied', 'school', 'cyberbullying', 'perpetration', 'adolescents', 'bully', 'victims', 'involvement']	["Autistic children report higher levels of bullying victimization than their non-autistic peers. However, autistic children with fewer social difficulties, as measured on the Autism Diagnostic Observation Schedule (ADOS), are more likely to report being bullied. Autistic children with stronger social skills may not only be more likely to identify and report incidents of bullying, but they may al…	bullying - victimization - bullied - school - cyberbullying - perpetration - adolescents - bully - victims - involvement	1	FALSE
22945359	2013	3	17	A prospective study of autistic-like traits in unaffected siblings of probands with autism spectrum disorder.	0	0_diagnostic_screening_dsm_diagnosis	['diagnostic', 'screening', 'dsm', 'diagnosis', 'autism', 'ados', 'chat', 'months', 'developmental', 'specificity']	["The Modified Checklist for Autism in Toddlers (M-CHAT) could be appropriate for universal screening for autism spectrum disorder (ASD) at 18 months and 24 months. Validation studies, however, reported differences in psychometric properties across sample populations. This meta-analysis summarized its accuracy measures and quantified their change in relation to patient and study characteristics.F…	diagnostic - screening - dsm - diagnosis - autism - ados - chat - months - developmental - specificity	1	FALSE
22947311	2013	1	28	Decreased leftward bias of prefrontal activity in autism spectrum disorder revealed by functional near-infrared spectroscopy.	64	64_meg_alpha_gamma_hz	['meg', 'alpha', 'gamma', 'hz', 'activity', 'magnetoencephalography', 'oscillations', 'band', 'neural', 'power']	['Synchronous neural oscillatory activity in the gamma range (30-80 Hz) has been shown to be abnormal in individuals with autism spectrum disorders (ASD) and their first-degree relatives in response to simple auditory stimuli. Gamma-band abnormalities in ASD probands have been seen in response to language stimuli, but this has not been investigated in first-degree relatives. This is of particular…	meg - alpha - gamma - hz - activity - magnetoencephalography - oscillations - band - neural - power	1	FALSE
[truncated: 29,041 more rows]
