# Supplementary material for: Deriving comprehensive literature trends on multi-omics analysis studies in autism spectrum disorder using literature mining pipeline
Source: Front Neurosci. 2024 Nov 12;18:1400412. doi: 10.3389/fnins.2024.1400412 (PMC11590066; doi:10.3389/fnins.2024.1400412)
Supplement: SUPPLEMENTARY TABLE S2 — Gene lists identified by the NER module from multi-omics abstracts. [file Table_2.XLSX]

## Sheet: Sheet1
Topic	Abstract	Entity	EntityCategory	Score
57_snps_association_genetic_polymorphisms	Single nucleotide polymorphisms (SNPs) are important markers which can be used in association studies searching for susceptible genes of complex diseases. High-throughput methods are needed for SNP genotyping in a large number of samples. In this study, we applied polyacrylamide gel-based microarray combined with dual-color hybridization for association study of four BDNF polymorphisms with autis…	BDNF	Gene	0.976375
57_snps_association_genetic_polymorphisms	Single nucleotide polymorphisms (SNPs) are important markers which can be used in association studies searching for susceptible genes of complex diseases. High-throughput methods are needed for SNP genotyping in a large number of samples. In this study, we applied polyacrylamide gel-based microarray combined with dual-color hybridization for association study of four BDNF polymorphisms with autis…	BDNF	Gene	0.9922935962677002
57_snps_association_genetic_polymorphisms	This study evaluated the association between autism spectrum disorders (ASDs) and microsatellites (RS3 and RS1) in the 5' flanking region of AVPR1A in 148 Korean trios comprising children with ASDs. In the transmission equilibrium test and haplotype analysis, we found a statistically significant association between microsatellites and Korean ASDs.	AVPR1A	Gene	0.9936690926551819
52_metabolic_metabolism_amino_metabolites	Aminoacylase 1 (ACY1) deficiency is a recently described inborn error of metabolism. Most of the patients reported so far have presented with rather heterogeneous neurologic symptoms. At this moment, it is not clear whether ACY1 deficiency represents a true metabolic disease with a causal relationship between the enzyme defect and the clinical phenotype or merely a biochemical abnormality. Here w…	Aminoacylase 1	Gene	0.8585160672664642
52_metabolic_metabolism_amino_metabolites	Aminoacylase 1 (ACY1) deficiency is a recently described inborn error of metabolism. Most of the patients reported so far have presented with rather heterogeneous neurologic symptoms. At this moment, it is not clear whether ACY1 deficiency represents a true metabolic disease with a causal relationship between the enzyme defect and the clinical phenotype or merely a biochemical abnormality. Here w…	ACY1	Gene	0.9911510348320007
52_metabolic_metabolism_amino_metabolites	Aminoacylase 1 (ACY1) deficiency is a recently described inborn error of metabolism. Most of the patients reported so far have presented with rather heterogeneous neurologic symptoms. At this moment, it is not clear whether ACY1 deficiency represents a true metabolic disease with a causal relationship between the enzyme defect and the clinical phenotype or merely a biochemical abnormality. Here w…	ACY1	Gene	0.9868877530097961
52_metabolic_metabolism_amino_metabolites	Aminoacylase 1 (ACY1) deficiency is a recently described inborn error of metabolism. Most of the patients reported so far have presented with rather heterogeneous neurologic symptoms. At this moment, it is not clear whether ACY1 deficiency represents a true metabolic disease with a causal relationship between the enzyme defect and the clinical phenotype or merely a biochemical abnormality. Here w…	ACY1	Gene	0.9781032800674438
52_metabolic_metabolism_amino_metabolites	Aminoacylase 1 (ACY1) deficiency is a recently described inborn error of metabolism. Most of the patients reported so far have presented with rather heterogeneous neurologic symptoms. At this moment, it is not clear whether ACY1 deficiency represents a true metabolic disease with a causal relationship between the enzyme defect and the clinical phenotype or merely a biochemical abnormality. Here w…	ACY1-deficient	Gene	0.8578333258628845
41_variants_sequencing_exome_variant	Corpus callosum abnormalities, intellectual disability, speech impairment, and autism in patients with haploinsufficiency of ARID1B. Corpus callosum abnormalities are common brain malformations with a wide clinical spectrum ranging from severe intellectual disability to normal cognitive function. The etiology is expected to be genetic in as much as 30-50% of the cases, but the underlying genetic …	ARID1B	Gene	0.9646972417831421
41_variants_sequencing_exome_variant	Corpus callosum abnormalities, intellectual disability, speech impairment, and autism in patients with haploinsufficiency of ARID1B. Corpus callosum abnormalities are common brain malformations with a wide clinical spectrum ranging from severe intellectual disability to normal cognitive function. The etiology is expected to be genetic in as much as 30-50% of the cases, but the underlying genetic …	ARID1B	Gene	0.9967028498649597
41_variants_sequencing_exome_variant	Corpus callosum abnormalities, intellectual disability, speech impairment, and autism in patients with haploinsufficiency of ARID1B. Corpus callosum abnormalities are common brain malformations with a wide clinical spectrum ranging from severe intellectual disability to normal cognitive function. The etiology is expected to be genetic in as much as 30-50% of the cases, but the underlying genetic …	ARID1B	Gene	0.9932327270507812
41_variants_sequencing_exome_variant	Corpus callosum abnormalities, intellectual disability, speech impairment, and autism in patients with haploinsufficiency of ARID1B. Corpus callosum abnormalities are common brain malformations with a wide clinical spectrum ranging from severe intellectual disability to normal cognitive function. The etiology is expected to be genetic in as much as 30-50% of the cases, but the underlying genetic …	ARID1B	Gene	0.9953846335411072
41_variants_sequencing_exome_variant	Corpus callosum abnormalities, intellectual disability, speech impairment, and autism in patients with haploinsufficiency of ARID1B. Corpus callosum abnormalities are common brain malformations with a wide clinical spectrum ranging from severe intellectual disability to normal cognitive function. The etiology is expected to be genetic in as much as 30-50% of the cases, but the underlying genetic …	ARID1B	Gene	0.9892577528953552
41_variants_sequencing_exome_variant	Corpus callosum abnormalities, intellectual disability, speech impairment, and autism in patients with haploinsufficiency of ARID1B. Corpus callosum abnormalities are common brain malformations with a wide clinical spectrum ranging from severe intellectual disability to normal cognitive function. The etiology is expected to be genetic in as much as 30-50% of the cases, but the underlying genetic …	ARID1B	Gene	0.9882969260215759
57_snps_association_genetic_polymorphisms	Autism Spectrum Disorder (ASD) has a heterogeneous etiology that is genetically complex. It is defined by deficits in communication and social skills and the presence of restricted and repetitive behaviors. Genetic analyses of heritable quantitative traits that correlate with ASD may reduce heterogeneity. With this in mind, deficits in nonverbal communication (NVC) were quantified based on items …	Nerve Growth Factor	Gene	0.7243923743565878
57_snps_association_genetic_polymorphisms	Autism Spectrum Disorder (ASD) has a heterogeneous etiology that is genetically complex. It is defined by deficits in communication and social skills and the presence of restricted and repetitive behaviors. Genetic analyses of heritable quantitative traits that correlate with ASD may reduce heterogeneity. With this in mind, deficits in nonverbal communication (NVC) were quantified based on items …	NGF	Gene	0.9217382669448853
57_snps_association_genetic_polymorphisms	Autism Spectrum Disorder (ASD) has a heterogeneous etiology that is genetically complex. It is defined by deficits in communication and social skills and the presence of restricted and repetitive behaviors. Genetic analyses of heritable quantitative traits that correlate with ASD may reduce heterogeneity. With this in mind, deficits in nonverbal communication (NVC) were quantified based on items …	KCND3	Gene	0.9983031749725342
57_snps_association_genetic_polymorphisms	Autism Spectrum Disorder (ASD) has a heterogeneous etiology that is genetically complex. It is defined by deficits in communication and social skills and the presence of restricted and repetitive behaviors. Genetic analyses of heritable quantitative traits that correlate with ASD may reduce heterogeneity. With this in mind, deficits in nonverbal communication (NVC) were quantified based on items …	NGF	Gene	0.9455272555351257
57_snps_association_genetic_polymorphisms	Autism Spectrum Disorder (ASD) has a heterogeneous etiology that is genetically complex. It is defined by deficits in communication and social skills and the presence of restricted and repetitive behaviors. Genetic analyses of heritable quantitative traits that correlate with ASD may reduce heterogeneity. With this in mind, deficits in nonverbal communication (NVC) were quantified based on items …	KCND3	Gene	0.9978582262992859
57_snps_association_genetic_polymorphisms	Autism Spectrum Disorder (ASD) has a heterogeneous etiology that is genetically complex. It is defined by deficits in communication and social skills and the presence of restricted and repetitive behaviors. Genetic analyses of heritable quantitative traits that correlate with ASD may reduce heterogeneity. With this in mind, deficits in nonverbal communication (NVC) were quantified based on items …	NGF	Gene	0.9297130107879639
57_snps_association_genetic_polymorphisms	Autism Spectrum Disorder (ASD) has a heterogeneous etiology that is genetically complex. It is defined by deficits in communication and social skills and the presence of restricted and repetitive behaviors. Genetic analyses of heritable quantitative traits that correlate with ASD may reduce heterogeneity. With this in mind, deficits in nonverbal communication (NVC) were quantified based on items …	KCND3	Gene	0.9971795082092285
57_snps_association_genetic_polymorphisms	Autism Spectrum Disorder (ASD) has a heterogeneous etiology that is genetically complex. It is defined by deficits in communication and social skills and the presence of restricted and repetitive behaviors. Genetic analyses of heritable quantitative traits that correlate with ASD may reduce heterogeneity. With this in mind, deficits in nonverbal communication (NVC) were quantified based on items …	NGF	Gene	0.9377669095993042
24_cacna1c_mutation_mutations_timothy	Timothy syndrome (TS) is an autosomal dominant condition with the constellation of features including prolonged QT interval, hand and foot abnormalities, and mental retardation or autism. Splawski et al. [2004] previously described two phenotypes associated with TS distinguished by two unique and different mutations within the CACNA1C gene. We report on a newborn who presented with prolonged QT i…	CACNA1C	Gene	0.977417
24_cacna1c_mutation_mutations_timothy	Timothy syndrome (TS) is an autosomal dominant condition with the constellation of features including prolonged QT interval, hand and foot abnormalities, and mental retardation or autism. Splawski et al. [2004] previously described two phenotypes associated with TS distinguished by two unique and different mutations within the CACNA1C gene. We report on a newborn who presented with prolonged QT i…	CACNA1C	Gene	0.9843320846557617
69_cnvs_cnv_copy_genomic	Higher resolution whole-genome arrays facilitate the identification of smaller copy number variations (CNVs) and their integral genes contributing to autism and/or intellectual disability (ASD/ID). Our study describes the use of one of the highest resolution arrays, the Affymetrix(Â®) Cytogenetics 2.7M array, coupled with quantitative multiplex polymerase chain reaction (PCR) of short fluorescent…	DMD	Gene	0.6635540127754211
57_snps_association_genetic_polymorphisms	Autism spectrum disorder is a neurodevelopmental disorder characterized by deficits in social communication, impaired reciprocal social interaction, and repetitive patterns of behaviors or interests. Although the cause of autism spectrum disorder remains elusive, the present study identified peroxisomal biogenesis factor 7 (PEX7) as a gene associated with autism spectrum disorder, and this associ…	peroxisomal biogenesis factor 7	Gene	0.7846296280622482
57_snps_association_genetic_polymorphisms	Autism spectrum disorder is a neurodevelopmental disorder characterized by deficits in social communication, impaired reciprocal social interaction, and repetitive patterns of behaviors or interests. Although the cause of autism spectrum disorder remains elusive, the present study identified peroxisomal biogenesis factor 7 (PEX7) as a gene associated with autism spectrum disorder, and this associ…	PEX7	Gene	0.9812971353530884
57_snps_association_genetic_polymorphisms	Autism spectrum disorder is a neurodevelopmental disorder characterized by deficits in social communication, impaired reciprocal social interaction, and repetitive patterns of behaviors or interests. Although the cause of autism spectrum disorder remains elusive, the present study identified peroxisomal biogenesis factor 7 (PEX7) as a gene associated with autism spectrum disorder, and this associ…	PEX7	Gene	0.9827418923377991
57_snps_association_genetic_polymorphisms	Autism spectrum disorder is a neurodevelopmental disorder characterized by deficits in social communication, impaired reciprocal social interaction, and repetitive patterns of behaviors or interests. Although the cause of autism spectrum disorder remains elusive, the present study identified peroxisomal biogenesis factor 7 (PEX7) as a gene associated with autism spectrum disorder, and this associ…	PEX7	Gene	0.9298970699310303
57_snps_association_genetic_polymorphisms	Autism spectrum disorder is a neurodevelopmental disorder characterized by deficits in social communication, impaired reciprocal social interaction, and repetitive patterns of behaviors or interests. Although the cause of autism spectrum disorder remains elusive, the present study identified peroxisomal biogenesis factor 7 (PEX7) as a gene associated with autism spectrum disorder, and this associ…	PEX7	Gene	0.9693403244018555
96_channel_scn2a_channels_voltage	The aim of this article is to describe the roles of water channel proteins (WCPs) in brain functionality. The fluid compartments of the brain, which include the brain parenchyma (with intracellular and extracellular spaces), the intravascular and the cerebrospinal fluid compartments are presented. Then the localization and functional roles of WCPs found in the brain are described: AQP1, AQP2, AQP…	water channel proteins	Gene	0.6949296196301779
96_channel_scn2a_channels_voltage	The aim of this article is to describe the roles of water channel proteins (WCPs) in brain functionality. The fluid compartments of the brain, which include the brain parenchyma (with intracellular and extracellular spaces), the intravascular and the cerebrospinal fluid compartments are presented. Then the localization and functional roles of WCPs found in the brain are described: AQP1, AQP2, AQP…	WCPs	Gene	0.7240050435066223
96_channel_scn2a_channels_voltage	The aim of this article is to describe the roles of water channel proteins (WCPs) in brain functionality. The fluid compartments of the brain, which include the brain parenchyma (with intracellular and extracellular spaces), the intravascular and the cerebrospinal fluid compartments are presented. Then the localization and functional roles of WCPs found in the brain are described: AQP1, AQP2, AQP…	AQP1	Gene	0.9965230226516724
96_channel_scn2a_channels_voltage	The aim of this article is to describe the roles of water channel proteins (WCPs) in brain functionality. The fluid compartments of the brain, which include the brain parenchyma (with intracellular and extracellular spaces), the intravascular and the cerebrospinal fluid compartments are presented. Then the localization and functional roles of WCPs found in the brain are described: AQP1, AQP2, AQP…	AQP2	Gene	0.9959279894828796
96_channel_scn2a_channels_voltage	The aim of this article is to describe the roles of water channel proteins (WCPs) in brain functionality. The fluid compartments of the brain, which include the brain parenchyma (with intracellular and extracellular spaces), the intravascular and the cerebrospinal fluid compartments are presented. Then the localization and functional roles of WCPs found in the brain are described: AQP1, AQP2, AQP…	AQP3	Gene	0.9938062429428101
96_channel_scn2a_channels_voltage	The aim of this article is to describe the roles of water channel proteins (WCPs) in brain functionality. The fluid compartments of the brain, which include the brain parenchyma (with intracellular and extracellular spaces), the intravascular and the cerebrospinal fluid compartments are presented. Then the localization and functional roles of WCPs found in the brain are described: AQP1, AQP2, AQP…	AQP4	Gene	0.9939809441566467
96_channel_scn2a_channels_voltage	The aim of this article is to describe the roles of water channel proteins (WCPs) in brain functionality. The fluid compartments of the brain, which include the brain parenchyma (with intracellular and extracellular spaces), the intravascular and the cerebrospinal fluid compartments are presented. Then the localization and functional roles of WCPs found in the brain are described: AQP1, AQP2, AQP…	AQP5	Gene	0.9951064586639404
96_channel_scn2a_channels_voltage	The aim of this article is to describe the roles of water channel proteins (WCPs) in brain functionality. The fluid compartments of the brain, which include the brain parenchyma (with intracellular and extracellular spaces), the intravascular and the cerebrospinal fluid compartments are presented. Then the localization and functional roles of WCPs found in the brain are described: AQP1, AQP2, AQP…	AQP7	Gene	0.9950283169746399
96_channel_scn2a_channels_voltage	The aim of this article is to describe the roles of water channel proteins (WCPs) in brain functionality. The fluid compartments of the brain, which include the brain parenchyma (with intracellular and extracellular spaces), the intravascular and the cerebrospinal fluid compartments are presented. Then the localization and functional roles of WCPs found in the brain are described: AQP1, AQP2, AQP…	AQP8	Gene	0.9939853549003601
96_channel_scn2a_channels_voltage	The aim of this article is to describe the roles of water channel proteins (WCPs) in brain functionality. The fluid compartments of the brain, which include the brain parenchyma (with intracellular and extracellular spaces), the intravascular and the cerebrospinal fluid compartments are presented. Then the localization and functional roles of WCPs found in the brain are described: AQP1, AQP2, AQP…	AQP9	Gene	0.9917152523994446
96_channel_scn2a_channels_voltage	The aim of this article is to describe the roles of water channel proteins (WCPs) in brain functionality. The fluid compartments of the brain, which include the brain parenchyma (with intracellular and extracellular spaces), the intravascular and the cerebrospinal fluid compartments are presented. Then the localization and functional roles of WCPs found in the brain are described: AQP1, AQP2, AQP…	AQP11	Gene	0.9953029155731201
2_synaptic_genes_mice_protein	Autism and epilepsy are common childhood neurological disorders with a great heterogeneity of clinical phenotypes as well as risk factors. There is a high co-morbidity of autism and epilepsy. The neuropathology of autism and epilepsy has similar histology implicating the processes of neurogenesis, neural migration, programmed cell death, and neurite outgrowth. Genetic advances have identified mul…	GABA(A) receptor	Gene	0.648853
16_deletion_duplication_16p11_22q11	Social behavior dysfunction is a symptomatic element of schizophrenia and autism spectrum disorder (ASD). Although altered activities in numerous brain regions are associated with defective social cognition and perception, the causative relationship between these altered activities and social cognition and perception-and their genetic underpinnings-are not known in humans. To address these issues…	Sept5	Gene	0.9915334582328796
16_deletion_duplication_16p11_22q11	Social behavior dysfunction is a symptomatic element of schizophrenia and autism spectrum disorder (ASD). Although altered activities in numerous brain regions are associated with defective social cognition and perception, the causative relationship between these altered activities and social cognition and perception-and their genetic underpinnings-are not known in humans. To address these issues…	Sept5	Gene	0.992733
16_deletion_duplication_16p11_22q11	Social behavior dysfunction is a symptomatic element of schizophrenia and autism spectrum disorder (ASD). Although altered activities in numerous brain regions are associated with defective social cognition and perception, the causative relationship between these altered activities and social cognition and perception-and their genetic underpinnings-are not known in humans. To address these issues…	Sept5	Gene	0.9947598576545715
16_deletion_duplication_16p11_22q11	Social behavior dysfunction is a symptomatic element of schizophrenia and autism spectrum disorder (ASD). Although altered activities in numerous brain regions are associated with defective social cognition and perception, the causative relationship between these altered activities and social cognition and perception-and their genetic underpinnings-are not known in humans. To address these issues…	Sept5	Gene	0.9973381161689758
16_deletion_duplication_16p11_22q11	Social behavior dysfunction is a symptomatic element of schizophrenia and autism spectrum disorder (ASD). Although altered activities in numerous brain regions are associated with defective social cognition and perception, the causative relationship between these altered activities and social cognition and perception-and their genetic underpinnings-are not known in humans. To address these issues…	Sept5	Gene	0.9922950267791748
16_deletion_duplication_16p11_22q11	Copy number variants (CNVs) and intragenic rearrangements of the NRXN1 (neurexin 1) gene are associated with a wide spectrum of developmental and neuropsychiatric disorders, including intellectual disability, speech delay, autism spectrum disorders (ASDs), hypotonia and schizophrenia. We performed a detailed clinical and molecular characterization of 24 patients who underwent clinical microarray …	NRXN1	Gene	0.9781809449195862
16_deletion_duplication_16p11_22q11	Copy number variants (CNVs) and intragenic rearrangements of the NRXN1 (neurexin 1) gene are associated with a wide spectrum of developmental and neuropsychiatric disorders, including intellectual disability, speech delay, autism spectrum disorders (ASDs), hypotonia and schizophrenia. We performed a detailed clinical and molecular characterization of 24 patients who underwent clinical microarray …	neurexin 1	Gene	0.6828025579452515
16_deletion_duplication_16p11_22q11	Copy number variants (CNVs) and intragenic rearrangements of the NRXN1 (neurexin 1) gene are associated with a wide spectrum of developmental and neuropsychiatric disorders, including intellectual disability, speech delay, autism spectrum disorders (ASDs), hypotonia and schizophrenia. We performed a detailed clinical and molecular characterization of 24 patients who underwent clinical microarray …	NRXN1	Gene	0.9977971315383911
16_deletion_duplication_16p11_22q11	Copy number variants (CNVs) and intragenic rearrangements of the NRXN1 (neurexin 1) gene are associated with a wide spectrum of developmental and neuropsychiatric disorders, including intellectual disability, speech delay, autism spectrum disorders (ASDs), hypotonia and schizophrenia. We performed a detailed clinical and molecular characterization of 24 patients who underwent clinical microarray …	NRXN1	Gene	0.9956525564193726
16_deletion_duplication_16p11_22q11	Copy number variants (CNVs) and intragenic rearrangements of the NRXN1 (neurexin 1) gene are associated with a wide spectrum of developmental and neuropsychiatric disorders, including intellectual disability, speech delay, autism spectrum disorders (ASDs), hypotonia and schizophrenia. We performed a detailed clinical and molecular characterization of 24 patients who underwent clinical microarray …	NRXN1	Gene	0.9935235977172852
16_deletion_duplication_16p11_22q11	Copy number variants (CNVs) and intragenic rearrangements of the NRXN1 (neurexin 1) gene are associated with a wide spectrum of developmental and neuropsychiatric disorders, including intellectual disability, speech delay, autism spectrum disorders (ASDs), hypotonia and schizophrenia. We performed a detailed clinical and molecular characterization of 24 patients who underwent clinical microarray …	neurexin 1	Gene	0.7182495296001434
16_deletion_duplication_16p11_22q11	Copy number variants (CNVs) and intragenic rearrangements of the NRXN1 (neurexin 1) gene are associated with a wide spectrum of developmental and neuropsychiatric disorders, including intellectual disability, speech delay, autism spectrum disorders (ASDs), hypotonia and schizophrenia. We performed a detailed clinical and molecular characterization of 24 patients who underwent clinical microarray …	NRXN1	Gene	0.9957905411720276
120_pten_phts_macrocephaly_mutations	PTEN germline mutations are found in a small subset of children diagnosed with autism spectrum disorder (ASD) and accompanying macrocephaly. In this review, we discuss recent advances that offer insight into the pathogenesis of this subgroup of autism patients. We provide an overview of how disrupting PTEN function influences neuronal cells, and describe efforts to decipher the cellular mechanism…	PTEN	Gene	0.9782680869102478
120_pten_phts_macrocephaly_mutations	PTEN germline mutations are found in a small subset of children diagnosed with autism spectrum disorder (ASD) and accompanying macrocephaly. In this review, we discuss recent advances that offer insight into the pathogenesis of this subgroup of autism patients. We provide an overview of how disrupting PTEN function influences neuronal cells, and describe efforts to decipher the cellular mechanism…	PTEN	Gene	0.9703434109687805
120_pten_phts_macrocephaly_mutations	PTEN germline mutations are found in a small subset of children diagnosed with autism spectrum disorder (ASD) and accompanying macrocephaly. In this review, we discuss recent advances that offer insight into the pathogenesis of this subgroup of autism patients. We provide an overview of how disrupting PTEN function influences neuronal cells, and describe efforts to decipher the cellular mechanism…	PTEN	Gene	0.9068624377250671
120_pten_phts_macrocephaly_mutations	PTEN germline mutations are found in a small subset of children diagnosed with autism spectrum disorder (ASD) and accompanying macrocephaly. In this review, we discuss recent advances that offer insight into the pathogenesis of this subgroup of autism patients. We provide an overview of how disrupting PTEN function influences neuronal cells, and describe efforts to decipher the cellular mechanism…	PTEN	Gene	0.9644664525985718
120_pten_phts_macrocephaly_mutations	PTEN germline mutations are found in a small subset of children diagnosed with autism spectrum disorder (ASD) and accompanying macrocephaly. In this review, we discuss recent advances that offer insight into the pathogenesis of this subgroup of autism patients. We provide an overview of how disrupting PTEN function influences neuronal cells, and describe efforts to decipher the cellular mechanism…	PTEN	Gene	0.9498515129089355
120_pten_phts_macrocephaly_mutations	PTEN germline mutations are found in a small subset of children diagnosed with autism spectrum disorder (ASD) and accompanying macrocephaly. In this review, we discuss recent advances that offer insight into the pathogenesis of this subgroup of autism patients. We provide an overview of how disrupting PTEN function influences neuronal cells, and describe efforts to decipher the cellular mechanism…	PTEN	Gene	0.9200636148452759
15_genes_variants_mutations_novo	In a developmentally delayed girl with an autism spectrum disorder, Single nucleotide polymorphism (SNP) array analysis showed a de novo 280 kb deletion on chromosome 16q23.2 involving two genes, GAN and CMIP. Inactivating mutations in GAN cause the autosomal recessive disorder giant axonal neuropathy, not present in our patient. CMIP was recently implicated in the etiology of specific language i…	GAN	Gene	0.8301649689674377
15_genes_variants_mutations_novo	In a developmentally delayed girl with an autism spectrum disorder, Single nucleotide polymorphism (SNP) array analysis showed a de novo 280 kb deletion on chromosome 16q23.2 involving two genes, GAN and CMIP. Inactivating mutations in GAN cause the autosomal recessive disorder giant axonal neuropathy, not present in our patient. CMIP was recently implicated in the etiology of specific language i…	CMIP	Gene	0.9537158608436584
15_genes_variants_mutations_novo	In a developmentally delayed girl with an autism spectrum disorder, Single nucleotide polymorphism (SNP) array analysis showed a de novo 280 kb deletion on chromosome 16q23.2 involving two genes, GAN and CMIP. Inactivating mutations in GAN cause the autosomal recessive disorder giant axonal neuropathy, not present in our patient. CMIP was recently implicated in the etiology of specific language i…	GAN	Gene	0.6615278124809265
15_genes_variants_mutations_novo	In a developmentally delayed girl with an autism spectrum disorder, Single nucleotide polymorphism (SNP) array analysis showed a de novo 280 kb deletion on chromosome 16q23.2 involving two genes, GAN and CMIP. Inactivating mutations in GAN cause the autosomal recessive disorder giant axonal neuropathy, not present in our patient. CMIP was recently implicated in the etiology of specific language i…	CMIP	Gene	0.8962898850440979
15_genes_variants_mutations_novo	In a developmentally delayed girl with an autism spectrum disorder, Single nucleotide polymorphism (SNP) array analysis showed a de novo 280 kb deletion on chromosome 16q23.2 involving two genes, GAN and CMIP. Inactivating mutations in GAN cause the autosomal recessive disorder giant axonal neuropathy, not present in our patient. CMIP was recently implicated in the etiology of specific language i…	CMIP	Gene	0.9689449667930603
2_synaptic_genes_mice_protein	RNA splicing plays a critical role in the programming of neuronal differentiation and, consequently, normal human neurodevelopment, and its disruption may underlie neurodevelopmental and neuropsychiatric disorders. The RNA-binding protein, fox-1 homolog (RBFOX1; also termed A2BP1 or FOX1), is a neuron-specific splicing factor predicted to regulate neuronal splicing networks clinically implicated …	fox-1	Gene	0.8044846057891846
2_synaptic_genes_mice_protein	RNA splicing plays a critical role in the programming of neuronal differentiation and, consequently, normal human neurodevelopment, and its disruption may underlie neurodevelopmental and neuropsychiatric disorders. The RNA-binding protein, fox-1 homolog (RBFOX1; also termed A2BP1 or FOX1), is a neuron-specific splicing factor predicted to regulate neuronal splicing networks clinically implicated …	RBFOX1	Gene	0.9884945750236511
2_synaptic_genes_mice_protein	RNA splicing plays a critical role in the programming of neuronal differentiation and, consequently, normal human neurodevelopment, and its disruption may underlie neurodevelopmental and neuropsychiatric disorders. The RNA-binding protein, fox-1 homolog (RBFOX1; also termed A2BP1 or FOX1), is a neuron-specific splicing factor predicted to regulate neuronal splicing networks clinically implicated …	A2BP1	Gene	0.9863603115081787
2_synaptic_genes_mice_protein	RNA splicing plays a critical role in the programming of neuronal differentiation and, consequently, normal human neurodevelopment, and its disruption may underlie neurodevelopmental and neuropsychiatric disorders. The RNA-binding protein, fox-1 homolog (RBFOX1; also termed A2BP1 or FOX1), is a neuron-specific splicing factor predicted to regulate neuronal splicing networks clinically implicated …	FOX1	Gene	0.9882276654243469
2_synaptic_genes_mice_protein	RNA splicing plays a critical role in the programming of neuronal differentiation and, consequently, normal human neurodevelopment, and its disruption may underlie neurodevelopmental and neuropsychiatric disorders. The RNA-binding protein, fox-1 homolog (RBFOX1; also termed A2BP1 or FOX1), is a neuron-specific splicing factor predicted to regulate neuronal splicing networks clinically implicated …	RBFOX1	Gene	0.9819676876068115
2_synaptic_genes_mice_protein	RNA splicing plays a critical role in the programming of neuronal differentiation and, consequently, normal human neurodevelopment, and its disruption may underlie neurodevelopmental and neuropsychiatric disorders. The RNA-binding protein, fox-1 homolog (RBFOX1; also termed A2BP1 or FOX1), is a neuron-specific splicing factor predicted to regulate neuronal splicing networks clinically implicated …	RBFOX1	Gene	0.9950383305549622
2_synaptic_genes_mice_protein	RNA splicing plays a critical role in the programming of neuronal differentiation and, consequently, normal human neurodevelopment, and its disruption may underlie neurodevelopmental and neuropsychiatric disorders. The RNA-binding protein, fox-1 homolog (RBFOX1; also termed A2BP1 or FOX1), is a neuron-specific splicing factor predicted to regulate neuronal splicing networks clinically implicated …	RBFOX1	Gene	0.9907124638557434
2_synaptic_genes_mice_protein	RNA splicing plays a critical role in the programming of neuronal differentiation and, consequently, normal human neurodevelopment, and its disruption may underlie neurodevelopmental and neuropsychiatric disorders. The RNA-binding protein, fox-1 homolog (RBFOX1; also termed A2BP1 or FOX1), is a neuron-specific splicing factor predicted to regulate neuronal splicing networks clinically implicated …	RBFOX1	Gene	0.9925724267959595
38_mirnas_mir_mirna_expression	Regulation of calcium flux in the heart is a key process that affects cardiac excitability and contractility. Degenerative diseases, such as coronary artery disease, have long been recognized to alter the physiology of intracellular calcium regulation, leading to contractile dysfunction or arrhythmias. Since the discovery of the first gene mutation associated with catecholaminergic polymorphic ve…	ryanodine receptor 2	Gene	0.7052396138509115
38_mirnas_mir_mirna_expression	Regulation of calcium flux in the heart is a key process that affects cardiac excitability and contractility. Degenerative diseases, such as coronary artery disease, have long been recognized to alter the physiology of intracellular calcium regulation, leading to contractile dysfunction or arrhythmias. Since the discovery of the first gene mutation associated with catecholaminergic polymorphic ve…	RYR2	Gene	0.9828702807426453
38_mirnas_mir_mirna_expression	Regulation of calcium flux in the heart is a key process that affects cardiac excitability and contractility. Degenerative diseases, such as coronary artery disease, have long been recognized to alter the physiology of intracellular calcium regulation, leading to contractile dysfunction or arrhythmias. Since the discovery of the first gene mutation associated with catecholaminergic polymorphic ve…	calsequestrin 2	Gene	0.689893
38_mirnas_mir_mirna_expression	Regulation of calcium flux in the heart is a key process that affects cardiac excitability and contractility. Degenerative diseases, such as coronary artery disease, have long been recognized to alter the physiology of intracellular calcium regulation, leading to contractile dysfunction or arrhythmias. Since the discovery of the first gene mutation associated with catecholaminergic polymorphic ve…	CASQ2	Gene	0.9832894802093506
96_channel_scn2a_channels_voltage	In childhood, central nervous system (CNS) presentations associated with antibodies to voltage-gated potassium channel (VGKC) complex include limbic encephalitis, status epilepticus, epileptic encephalopathy, and autistic regression. We report the cases of two individuals (a 6-year-old male and an 11-year-old female) who presented with an acute-onset explosive seizure disorder with positive VGKC …	voltage-gated potassium channel	Gene	0.703202
96_channel_scn2a_channels_voltage	In childhood, central nervous system (CNS) presentations associated with antibodies to voltage-gated potassium channel (VGKC) complex include limbic encephalitis, status epilepticus, epileptic encephalopathy, and autistic regression. We report the cases of two individuals (a 6-year-old male and an 11-year-old female) who presented with an acute-onset explosive seizure disorder with positive VGKC …	VGKC	Gene	0.7554338574409485
96_channel_scn2a_channels_voltage	In childhood, central nervous system (CNS) presentations associated with antibodies to voltage-gated potassium channel (VGKC) complex include limbic encephalitis, status epilepticus, epileptic encephalopathy, and autistic regression. We report the cases of two individuals (a 6-year-old male and an 11-year-old female) who presented with an acute-onset explosive seizure disorder with positive VGKC …	VGKC	Gene	0.6149318814277649
96_channel_scn2a_channels_voltage	In childhood, central nervous system (CNS) presentations associated with antibodies to voltage-gated potassium channel (VGKC) complex include limbic encephalitis, status epilepticus, epileptic encephalopathy, and autistic regression. We report the cases of two individuals (a 6-year-old male and an 11-year-old female) who presented with an acute-onset explosive seizure disorder with positive VGKC …	leucine-rich glioma-inactivated 1	Gene	0.6906863252321879
96_channel_scn2a_channels_voltage	In childhood, central nervous system (CNS) presentations associated with antibodies to voltage-gated potassium channel (VGKC) complex include limbic encephalitis, status epilepticus, epileptic encephalopathy, and autistic regression. We report the cases of two individuals (a 6-year-old male and an 11-year-old female) who presented with an acute-onset explosive seizure disorder with positive VGKC …	LGI1	Gene	0.9570111036300659
96_channel_scn2a_channels_voltage	In childhood, central nervous system (CNS) presentations associated with antibodies to voltage-gated potassium channel (VGKC) complex include limbic encephalitis, status epilepticus, epileptic encephalopathy, and autistic regression. We report the cases of two individuals (a 6-year-old male and an 11-year-old female) who presented with an acute-onset explosive seizure disorder with positive VGKC …	contactin-associated protein 2	Gene	0.7537036736806234
96_channel_scn2a_channels_voltage	In childhood, central nervous system (CNS) presentations associated with antibodies to voltage-gated potassium channel (VGKC) complex include limbic encephalitis, status epilepticus, epileptic encephalopathy, and autistic regression. We report the cases of two individuals (a 6-year-old male and an 11-year-old female) who presented with an acute-onset explosive seizure disorder with positive VGKC …	contactin-2	Gene	0.9590903520584106
16_deletion_duplication_16p11_22q11	Chromosome 16 contains multiple copy number variations (CNVs) that predispose to genomic disorders. Here, we differentiate pathogenic duplications of 16p11.2-p12.2 from microscopically similar euchromatic variants of 16p11.2. Patient 1 was a girl of 18 with autism, moderate intellectual disability, behavioural difficulties, dysmorphic features and a 7.71-Mb (megabase pair) duplication (16:21â€‰52…	Polo-like kinase 1	Gene	0.7624597549438477
16_deletion_duplication_16p11_22q11	Chromosome 16 contains multiple copy number variations (CNVs) that predispose to genomic disorders. Here, we differentiate pathogenic duplications of 16p11.2-p12.2 from microscopically similar euchromatic variants of 16p11.2. Patient 1 was a girl of 18 with autism, moderate intellectual disability, behavioural difficulties, dysmorphic features and a 7.71-Mb (megabase pair) duplication (16:21â€‰52…	PLK1	Gene	0.9744064807891846
16_deletion_duplication_16p11_22q11	Chromosome 16 contains multiple copy number variations (CNVs) that predispose to genomic disorders. Here, we differentiate pathogenic duplications of 16p11.2-p12.2 from microscopically similar euchromatic variants of 16p11.2. Patient 1 was a girl of 18 with autism, moderate intellectual disability, behavioural difficulties, dysmorphic features and a 7.71-Mb (megabase pair) duplication (16:21â€‰52…	G-protein-regulated inducer of neurite growth 2	Gene	0.6237349808216095
16_deletion_duplication_16p11_22q11	Chromosome 16 contains multiple copy number variations (CNVs) that predispose to genomic disorders. Here, we differentiate pathogenic duplications of 16p11.2-p12.2 from microscopically similar euchromatic variants of 16p11.2. Patient 1 was a girl of 18 with autism, moderate intellectual disability, behavioural difficulties, dysmorphic features and a 7.71-Mb (megabase pair) duplication (16:21â€‰52…	GPRIN2	Gene	0.9334818720817566
16_deletion_duplication_16p11_22q11	Chromosome 16 contains multiple copy number variations (CNVs) that predispose to genomic disorders. Here, we differentiate pathogenic duplications of 16p11.2-p12.2 from microscopically similar euchromatic variants of 16p11.2. Patient 1 was a girl of 18 with autism, moderate intellectual disability, behavioural difficulties, dysmorphic features and a 7.71-Mb (megabase pair) duplication (16:21â€‰52…	immunoglobulin heavy chain	Gene	0.6994918584823608
16_deletion_duplication_16p11_22q11	Chromosome 16 contains multiple copy number variations (CNVs) that predispose to genomic disorders. Here, we differentiate pathogenic duplications of 16p11.2-p12.2 from microscopically similar euchromatic variants of 16p11.2. Patient 1 was a girl of 18 with autism, moderate intellectual disability, behavioural difficulties, dysmorphic features and a 7.71-Mb (megabase pair) duplication (16:21â€‰52…	IGHV	Gene	0.5970640778541565
16_deletion_duplication_16p11_22q11	Chromosome 16 contains multiple copy number variations (CNVs) that predispose to genomic disorders. Here, we differentiate pathogenic duplications of 16p11.2-p12.2 from microscopically similar euchromatic variants of 16p11.2. Patient 1 was a girl of 18 with autism, moderate intellectual disability, behavioural difficulties, dysmorphic features and a 7.71-Mb (megabase pair) duplication (16:21â€‰52…	HERC2P4	Gene	0.8752387166023254
16_deletion_duplication_16p11_22q11	Chromosome 16 contains multiple copy number variations (CNVs) that predispose to genomic disorders. Here, we differentiate pathogenic duplications of 16p11.2-p12.2 from microscopically similar euchromatic variants of 16p11.2. Patient 1 was a girl of 18 with autism, moderate intellectual disability, behavioural difficulties, dysmorphic features and a 7.71-Mb (megabase pair) duplication (16:21â€‰52…	TP53-inducible target gene 3	Gene	0.686692
16_deletion_duplication_16p11_22q11	Chromosome 16 contains multiple copy number variations (CNVs) that predispose to genomic disorders. Here, we differentiate pathogenic duplications of 16p11.2-p12.2 from microscopically similar euchromatic variants of 16p11.2. Patient 1 was a girl of 18 with autism, moderate intellectual disability, behavioural difficulties, dysmorphic features and a 7.71-Mb (megabase pair) duplication (16:21â€‰52…	TP53TG3	Gene	0.6158414483070374
24_cacna1c_mutation_mutations_timothy	Dravet syndrome is a severe form of epilepsy. Majority of patients have a mutation in SCN1A gene, which encodes a voltage-gated sodium channel. A recent study has demonstrated that 16% of SCN1A-negative patients have a mutation in PCDH19, the gene encoding protocadherin-19. Mutations in other genes account for only a very small proportion of families. TSPYL4 is a novel candidate gene within the l…	SCN1A	Gene	0.9876208901405334
24_cacna1c_mutation_mutations_timothy	Dravet syndrome is a severe form of epilepsy. Majority of patients have a mutation in SCN1A gene, which encodes a voltage-gated sodium channel. A recent study has demonstrated that 16% of SCN1A-negative patients have a mutation in PCDH19, the gene encoding protocadherin-19. Mutations in other genes account for only a very small proportion of families. TSPYL4 is a novel candidate gene within the l…	PCDH19	Gene	0.9953908920288086
24_cacna1c_mutation_mutations_timothy	Dravet syndrome is a severe form of epilepsy. Majority of patients have a mutation in SCN1A gene, which encodes a voltage-gated sodium channel. A recent study has demonstrated that 16% of SCN1A-negative patients have a mutation in PCDH19, the gene encoding protocadherin-19. Mutations in other genes account for only a very small proportion of families. TSPYL4 is a novel candidate gene within the l…	protocadherin-19	Gene	0.8683177828788757
24_cacna1c_mutation_mutations_timothy	Dravet syndrome is a severe form of epilepsy. Majority of patients have a mutation in SCN1A gene, which encodes a voltage-gated sodium channel. A recent study has demonstrated that 16% of SCN1A-negative patients have a mutation in PCDH19, the gene encoding protocadherin-19. Mutations in other genes account for only a very small proportion of families. TSPYL4 is a novel candidate gene within the l…	TSPYL4	Gene	0.9373887777328491
24_cacna1c_mutation_mutations_timothy	Dravet syndrome is a severe form of epilepsy. Majority of patients have a mutation in SCN1A gene, which encodes a voltage-gated sodium channel. A recent study has demonstrated that 16% of SCN1A-negative patients have a mutation in PCDH19, the gene encoding protocadherin-19. Mutations in other genes account for only a very small proportion of families. TSPYL4 is a novel candidate gene within the l…	SCN1A	Gene	0.9898608922958374
24_cacna1c_mutation_mutations_timothy	Dravet syndrome is a severe form of epilepsy. Majority of patients have a mutation in SCN1A gene, which encodes a voltage-gated sodium channel. A recent study has demonstrated that 16% of SCN1A-negative patients have a mutation in PCDH19, the gene encoding protocadherin-19. Mutations in other genes account for only a very small proportion of families. TSPYL4 is a novel candidate gene within the l…	SCN1A-negative	Gene	0.6525449752807617
24_cacna1c_mutation_mutations_timothy	Dravet syndrome is a severe form of epilepsy. Majority of patients have a mutation in SCN1A gene, which encodes a voltage-gated sodium channel. A recent study has demonstrated that 16% of SCN1A-negative patients have a mutation in PCDH19, the gene encoding protocadherin-19. Mutations in other genes account for only a very small proportion of families. TSPYL4 is a novel candidate gene within the l…	PCDH19	Gene	0.9972991347312927
24_cacna1c_mutation_mutations_timothy	Dravet syndrome is a severe form of epilepsy. Majority of patients have a mutation in SCN1A gene, which encodes a voltage-gated sodium channel. A recent study has demonstrated that 16% of SCN1A-negative patients have a mutation in PCDH19, the gene encoding protocadherin-19. Mutations in other genes account for only a very small proportion of families. TSPYL4 is a novel candidate gene within the l…	TSPYL4	Gene	0.9710591435432434
24_cacna1c_mutation_mutations_timothy	Dravet syndrome is a severe form of epilepsy. Majority of patients have a mutation in SCN1A gene, which encodes a voltage-gated sodium channel. A recent study has demonstrated that 16% of SCN1A-negative patients have a mutation in PCDH19, the gene encoding protocadherin-19. Mutations in other genes account for only a very small proportion of families. TSPYL4 is a novel candidate gene within the l…	SCN1A	Gene	0.9784834384918213
24_cacna1c_mutation_mutations_timothy	Dravet syndrome is a severe form of epilepsy. Majority of patients have a mutation in SCN1A gene, which encodes a voltage-gated sodium channel. A recent study has demonstrated that 16% of SCN1A-negative patients have a mutation in PCDH19, the gene encoding protocadherin-19. Mutations in other genes account for only a very small proportion of families. TSPYL4 is a novel candidate gene within the l…	PCDH19	Gene	0.9947211742401123
24_cacna1c_mutation_mutations_timothy	Dravet syndrome is a severe form of epilepsy. Majority of patients have a mutation in SCN1A gene, which encodes a voltage-gated sodium channel. A recent study has demonstrated that 16% of SCN1A-negative patients have a mutation in PCDH19, the gene encoding protocadherin-19. Mutations in other genes account for only a very small proportion of families. TSPYL4 is a novel candidate gene within the l…	PCDH19	Gene	0.9957966804504395
24_cacna1c_mutation_mutations_timothy	Dravet syndrome is a severe form of epilepsy. Majority of patients have a mutation in SCN1A gene, which encodes a voltage-gated sodium channel. A recent study has demonstrated that 16% of SCN1A-negative patients have a mutation in PCDH19, the gene encoding protocadherin-19. Mutations in other genes account for only a very small proportion of families. TSPYL4 is a novel candidate gene within the l…	TSPYL4	Gene	0.7002037167549133
24_cacna1c_mutation_mutations_timothy	Dravet syndrome is a severe form of epilepsy. Majority of patients have a mutation in SCN1A gene, which encodes a voltage-gated sodium channel. A recent study has demonstrated that 16% of SCN1A-negative patients have a mutation in PCDH19, the gene encoding protocadherin-19. Mutations in other genes account for only a very small proportion of families. TSPYL4 is a novel candidate gene within the l…	SCN1A	Gene	0.9900239109992981
24_cacna1c_mutation_mutations_timothy	Dravet syndrome is a severe form of epilepsy. Majority of patients have a mutation in SCN1A gene, which encodes a voltage-gated sodium channel. A recent study has demonstrated that 16% of SCN1A-negative patients have a mutation in PCDH19, the gene encoding protocadherin-19. Mutations in other genes account for only a very small proportion of families. TSPYL4 is a novel candidate gene within the l…	PCDH19	Gene	0.9973047971725464
24_cacna1c_mutation_mutations_timothy	Dravet syndrome is a severe form of epilepsy. Majority of patients have a mutation in SCN1A gene, which encodes a voltage-gated sodium channel. A recent study has demonstrated that 16% of SCN1A-negative patients have a mutation in PCDH19, the gene encoding protocadherin-19. Mutations in other genes account for only a very small proportion of families. TSPYL4 is a novel candidate gene within the l…	TSPYL4	Gene	0.838439
2_synaptic_genes_mice_protein	Adenosine-to-inosine (A-to-I) RNA editing is a neurodevelopmentally regulated epigenetic modification shown to modulate complex behavior in animals. Little is known about human A-to-I editing, but it is thought to constitute one of many molecular mechanisms connecting environmental stimuli and behavioral outputs. Thus, comprehensive exploration of A-to-I RNA editing in human brains may shed light…	adenosine deaminase	Gene	0.7444585263729095
2_synaptic_genes_mice_protein	Adenosine-to-inosine (A-to-I) RNA editing is a neurodevelopmentally regulated epigenetic modification shown to modulate complex behavior in animals. Little is known about human A-to-I editing, but it is thought to constitute one of many molecular mechanisms connecting environmental stimuli and behavioral outputs. Thus, comprehensive exploration of A-to-I RNA editing in human brains may shed light…	RNA B1	Gene	0.7219107151031494
2_synaptic_genes_mice_protein	In 1999, Hirose et al. reported a Japanese family with autosomal dominant nocturnal frontal lobe epilepsy (ADNFLE) associated with a neuronal nicotinic acetylcholine receptor Î±4 subunit mutation (S252L). We followed the siblings of this family, and found that the elder brother had Asperger's disorder without mental retardation (MR) and the younger brother had autistic disorder with profound MR. …	neuronal nicotinic acetylcholine receptor Î±4	Gene	0.5923132717609405
2_synaptic_genes_mice_protein	Signal transduction from the synapse to the nucleus subsequently involves transient increases in synaptic Ca2+, activation of CaM kinases, activation of the GTPase Ras, activation of the ERK mitogen-activated protein kinase pathway, and finally GSK3 inhibition and CREB-activation. Genetic studies in autism have identified mutations and copy number variations in a number of genes involved in this …	CaM kinases	Gene	0.6360325217247009
2_synaptic_genes_mice_protein	Signal transduction from the synapse to the nucleus subsequently involves transient increases in synaptic Ca2+, activation of CaM kinases, activation of the GTPase Ras, activation of the ERK mitogen-activated protein kinase pathway, and finally GSK3 inhibition and CREB-activation. Genetic studies in autism have identified mutations and copy number variations in a number of genes involved in this …	GTPase Ras	Gene	0.6322040259838104
2_synaptic_genes_mice_protein	Signal transduction from the synapse to the nucleus subsequently involves transient increases in synaptic Ca2+, activation of CaM kinases, activation of the GTPase Ras, activation of the ERK mitogen-activated protein kinase pathway, and finally GSK3 inhibition and CREB-activation. Genetic studies in autism have identified mutations and copy number variations in a number of genes involved in this …	ERK mitogen-activated protein kinase	Gene	0.6502868980169296
2_synaptic_genes_mice_protein	Signal transduction from the synapse to the nucleus subsequently involves transient increases in synaptic Ca2+, activation of CaM kinases, activation of the GTPase Ras, activation of the ERK mitogen-activated protein kinase pathway, and finally GSK3 inhibition and CREB-activation. Genetic studies in autism have identified mutations and copy number variations in a number of genes involved in this …	GSK3	Gene	0.9081717133522034
2_synaptic_genes_mice_protein	Signal transduction from the synapse to the nucleus subsequently involves transient increases in synaptic Ca2+, activation of CaM kinases, activation of the GTPase Ras, activation of the ERK mitogen-activated protein kinase pathway, and finally GSK3 inhibition and CREB-activation. Genetic studies in autism have identified mutations and copy number variations in a number of genes involved in this …	CACNA1C	Gene	0.9562667608261108
2_synaptic_genes_mice_protein	Signal transduction from the synapse to the nucleus subsequently involves transient increases in synaptic Ca2+, activation of CaM kinases, activation of the GTPase Ras, activation of the ERK mitogen-activated protein kinase pathway, and finally GSK3 inhibition and CREB-activation. Genetic studies in autism have identified mutations and copy number variations in a number of genes involved in this …	SYNGAP1	Gene	0.9891380667686462
2_synaptic_genes_mice_protein	Signal transduction from the synapse to the nucleus subsequently involves transient increases in synaptic Ca2+, activation of CaM kinases, activation of the GTPase Ras, activation of the ERK mitogen-activated protein kinase pathway, and finally GSK3 inhibition and CREB-activation. Genetic studies in autism have identified mutations and copy number variations in a number of genes involved in this …	MAPK3	Gene	0.9247427582740784
2_synaptic_genes_mice_protein	Signal transduction from the synapse to the nucleus subsequently involves transient increases in synaptic Ca2+, activation of CaM kinases, activation of the GTPase Ras, activation of the ERK mitogen-activated protein kinase pathway, and finally GSK3 inhibition and CREB-activation. Genetic studies in autism have identified mutations and copy number variations in a number of genes involved in this …	YWHAE	Gene	0.9411441683769226
2_synaptic_genes_mice_protein	Signal transduction from the synapse to the nucleus subsequently involves transient increases in synaptic Ca2+, activation of CaM kinases, activation of the GTPase Ras, activation of the ERK mitogen-activated protein kinase pathway, and finally GSK3 inhibition and CREB-activation. Genetic studies in autism have identified mutations and copy number variations in a number of genes involved in this …	ERK	Gene	0.8888301849365234
2_synaptic_genes_mice_protein	Signal transduction from the synapse to the nucleus subsequently involves transient increases in synaptic Ca2+, activation of CaM kinases, activation of the GTPase Ras, activation of the ERK mitogen-activated protein kinase pathway, and finally GSK3 inhibition and CREB-activation. Genetic studies in autism have identified mutations and copy number variations in a number of genes involved in this …	GSK3	Gene	0.9361518025398254
2_synaptic_genes_mice_protein	Signal transduction from the synapse to the nucleus subsequently involves transient increases in synaptic Ca2+, activation of CaM kinases, activation of the GTPase Ras, activation of the ERK mitogen-activated protein kinase pathway, and finally GSK3 inhibition and CREB-activation. Genetic studies in autism have identified mutations and copy number variations in a number of genes involved in this …	ERK	Gene	0.8718146085739136
2_synaptic_genes_mice_protein	Signal transduction from the synapse to the nucleus subsequently involves transient increases in synaptic Ca2+, activation of CaM kinases, activation of the GTPase Ras, activation of the ERK mitogen-activated protein kinase pathway, and finally GSK3 inhibition and CREB-activation. Genetic studies in autism have identified mutations and copy number variations in a number of genes involved in this …	ERK	Gene	0.8920406699180603
2_synaptic_genes_mice_protein	Autism spectrum disorders (ASDs) include three main conditions: autistic disorder (AD), pervasive developmental disorder, not otherwise specified (PDD-NOS), and Asperger syndrome. It has been shown that many genes associated with ASDs are involved in the neuroligin-neurexin interaction at the glutamate synapse: NLGN3, NLGN4, NRXN1, CNTNAP2, and SHANK3. We screened this last gene in two cohorts of…	neuroligin-neurexin	Gene	0.6481897830963135
2_synaptic_genes_mice_protein	Autism spectrum disorders (ASDs) include three main conditions: autistic disorder (AD), pervasive developmental disorder, not otherwise specified (PDD-NOS), and Asperger syndrome. It has been shown that many genes associated with ASDs are involved in the neuroligin-neurexin interaction at the glutamate synapse: NLGN3, NLGN4, NRXN1, CNTNAP2, and SHANK3. We screened this last gene in two cohorts of…	NLGN3	Gene	0.9951854348182678
2_synaptic_genes_mice_protein	Autism spectrum disorders (ASDs) include three main conditions: autistic disorder (AD), pervasive developmental disorder, not otherwise specified (PDD-NOS), and Asperger syndrome. It has been shown that many genes associated with ASDs are involved in the neuroligin-neurexin interaction at the glutamate synapse: NLGN3, NLGN4, NRXN1, CNTNAP2, and SHANK3. We screened this last gene in two cohorts of…	NLGN4	Gene	0.9974709749221802
2_synaptic_genes_mice_protein	Autism spectrum disorders (ASDs) include three main conditions: autistic disorder (AD), pervasive developmental disorder, not otherwise specified (PDD-NOS), and Asperger syndrome. It has been shown that many genes associated with ASDs are involved in the neuroligin-neurexin interaction at the glutamate synapse: NLGN3, NLGN4, NRXN1, CNTNAP2, and SHANK3. We screened this last gene in two cohorts of…	NRXN1	Gene	0.9962479472160339
2_synaptic_genes_mice_protein	Autism spectrum disorders (ASDs) include three main conditions: autistic disorder (AD), pervasive developmental disorder, not otherwise specified (PDD-NOS), and Asperger syndrome. It has been shown that many genes associated with ASDs are involved in the neuroligin-neurexin interaction at the glutamate synapse: NLGN3, NLGN4, NRXN1, CNTNAP2, and SHANK3. We screened this last gene in two cohorts of…	CNTNAP2	Gene	0.9964026212692261
2_synaptic_genes_mice_protein	Autism spectrum disorders (ASDs) include three main conditions: autistic disorder (AD), pervasive developmental disorder, not otherwise specified (PDD-NOS), and Asperger syndrome. It has been shown that many genes associated with ASDs are involved in the neuroligin-neurexin interaction at the glutamate synapse: NLGN3, NLGN4, NRXN1, CNTNAP2, and SHANK3. We screened this last gene in two cohorts of…	SHANK3	Gene	0.9963578581809998
2_synaptic_genes_mice_protein	Autism spectrum disorders (ASDs) include three main conditions: autistic disorder (AD), pervasive developmental disorder, not otherwise specified (PDD-NOS), and Asperger syndrome. It has been shown that many genes associated with ASDs are involved in the neuroligin-neurexin interaction at the glutamate synapse: NLGN3, NLGN4, NRXN1, CNTNAP2, and SHANK3. We screened this last gene in two cohorts of…	SHANK3	Gene	0.9950246214866638
2_synaptic_genes_mice_protein	Autism spectrum disorders (ASDs) include three main conditions: autistic disorder (AD), pervasive developmental disorder, not otherwise specified (PDD-NOS), and Asperger syndrome. It has been shown that many genes associated with ASDs are involved in the neuroligin-neurexin interaction at the glutamate synapse: NLGN3, NLGN4, NRXN1, CNTNAP2, and SHANK3. We screened this last gene in two cohorts of…	SHANK3	Gene	0.9969282746315002
41_variants_sequencing_exome_variant	Autistic spectrum disorders (ASDs) are a family of neurodevelopmental disorders with strong genetic components. Recent studies have shown that copy number variations in dosage sensitive genes can contribute significantly to these disorders. One such gene is the transcription factor MECP2, whose loss of function in females results in Rett syndrome, while its duplication in males results in develop…	MECP2	Gene	0.9488329887390137
41_variants_sequencing_exome_variant	Autistic spectrum disorders (ASDs) are a family of neurodevelopmental disorders with strong genetic components. Recent studies have shown that copy number variations in dosage sensitive genes can contribute significantly to these disorders. One such gene is the transcription factor MECP2, whose loss of function in females results in Rett syndrome, while its duplication in males results in develop…	MECP2-containing	Gene	0.922708
41_variants_sequencing_exome_variant	Autistic spectrum disorders (ASDs) are a family of neurodevelopmental disorders with strong genetic components. Recent studies have shown that copy number variations in dosage sensitive genes can contribute significantly to these disorders. One such gene is the transcription factor MECP2, whose loss of function in females results in Rett syndrome, while its duplication in males results in develop…	MECP2	Gene	0.9951668977737427
41_variants_sequencing_exome_variant	Autistic spectrum disorders (ASDs) are a family of neurodevelopmental disorders with strong genetic components. Recent studies have shown that copy number variations in dosage sensitive genes can contribute significantly to these disorders. One such gene is the transcription factor MECP2, whose loss of function in females results in Rett syndrome, while its duplication in males results in develop…	MECP2	Gene	0.9975488781929016
41_variants_sequencing_exome_variant	Autistic spectrum disorders (ASDs) are a family of neurodevelopmental disorders with strong genetic components. Recent studies have shown that copy number variations in dosage sensitive genes can contribute significantly to these disorders. One such gene is the transcription factor MECP2, whose loss of function in females results in Rett syndrome, while its duplication in males results in develop…	MECP2	Gene	0.992638
41_variants_sequencing_exome_variant	Autistic spectrum disorders (ASDs) are a family of neurodevelopmental disorders with strong genetic components. Recent studies have shown that copy number variations in dosage sensitive genes can contribute significantly to these disorders. One such gene is the transcription factor MECP2, whose loss of function in females results in Rett syndrome, while its duplication in males results in develop…	MECP2-containing	Gene	0.9746168255805969
2_synaptic_genes_mice_protein	Tourette syndrome (TS) is a highly heritable neuropsychiatric disorder characterised by motor and vocal tics. Despite decades of research, the aetiology of TS has remained elusive. Recent successes in gene discovery backed by rapidly advancing genomic technologies have given us new insights into the genetic basis of the disorder, but the growing collection of rare and disparate findings have adde…	neurexins	Gene	0.7331371903419495
2_synaptic_genes_mice_protein	Tourette syndrome (TS) is a highly heritable neuropsychiatric disorder characterised by motor and vocal tics. Despite decades of research, the aetiology of TS has remained elusive. Recent successes in gene discovery backed by rapidly advancing genomic technologies have given us new insights into the genetic basis of the disorder, but the growing collection of rare and disparate findings have adde…	NRXNs	Gene	0.8701789975166321
2_synaptic_genes_mice_protein	Tourette syndrome (TS) is a highly heritable neuropsychiatric disorder characterised by motor and vocal tics. Despite decades of research, the aetiology of TS has remained elusive. Recent successes in gene discovery backed by rapidly advancing genomic technologies have given us new insights into the genetic basis of the disorder, but the growing collection of rare and disparate findings have adde…	neuroligins	Gene	0.8782809376716614
2_synaptic_genes_mice_protein	Tourette syndrome (TS) is a highly heritable neuropsychiatric disorder characterised by motor and vocal tics. Despite decades of research, the aetiology of TS has remained elusive. Recent successes in gene discovery backed by rapidly advancing genomic technologies have given us new insights into the genetic basis of the disorder, but the growing collection of rare and disparate findings have adde…	NLGNs	Gene	0.9298117160797119
2_synaptic_genes_mice_protein	Tourette syndrome (TS) is a highly heritable neuropsychiatric disorder characterised by motor and vocal tics. Despite decades of research, the aetiology of TS has remained elusive. Recent successes in gene discovery backed by rapidly advancing genomic technologies have given us new insights into the genetic basis of the disorder, but the growing collection of rare and disparate findings have adde…	leucine-rich repeat transmembrane proteins	Gene	0.5815928280353546
2_synaptic_genes_mice_protein	Tourette syndrome (TS) is a highly heritable neuropsychiatric disorder characterised by motor and vocal tics. Despite decades of research, the aetiology of TS has remained elusive. Recent successes in gene discovery backed by rapidly advancing genomic technologies have given us new insights into the genetic basis of the disorder, but the growing collection of rare and disparate findings have adde…	LRRTMs	Gene	0.8232259154319763
2_synaptic_genes_mice_protein	Tourette syndrome (TS) is a highly heritable neuropsychiatric disorder characterised by motor and vocal tics. Despite decades of research, the aetiology of TS has remained elusive. Recent successes in gene discovery backed by rapidly advancing genomic technologies have given us new insights into the genetic basis of the disorder, but the growing collection of rare and disparate findings have adde…	leucine rich repeat neuronals	Gene	0.6785719692707062
2_synaptic_genes_mice_protein	Tourette syndrome (TS) is a highly heritable neuropsychiatric disorder characterised by motor and vocal tics. Despite decades of research, the aetiology of TS has remained elusive. Recent successes in gene discovery backed by rapidly advancing genomic technologies have given us new insights into the genetic basis of the disorder, but the growing collection of rare and disparate findings have adde…	LRRNs	Gene	0.6757579445838928
2_synaptic_genes_mice_protein	Tourette syndrome (TS) is a highly heritable neuropsychiatric disorder characterised by motor and vocal tics. Despite decades of research, the aetiology of TS has remained elusive. Recent successes in gene discovery backed by rapidly advancing genomic technologies have given us new insights into the genetic basis of the disorder, but the growing collection of rare and disparate findings have adde…	cerebellin precursor 2	Gene	0.6739873687426249
2_synaptic_genes_mice_protein	Tourette syndrome (TS) is a highly heritable neuropsychiatric disorder characterised by motor and vocal tics. Despite decades of research, the aetiology of TS has remained elusive. Recent successes in gene discovery backed by rapidly advancing genomic technologies have given us new insights into the genetic basis of the disorder, but the growing collection of rare and disparate findings have adde…	CBLN2	Gene	0.976604
57_snps_association_genetic_polymorphisms	Autism spectrum disorder (ASD) depends on a clinical interview with no biomarkers to aid diagnosis. The current investigation interrogated single-nucleotide polymorphisms (SNPs) of individuals with ASD from the Autism Genetic Resource Exchange (AGRE) database. SNPs were mapped to Kyoto Encyclopedia of Genes and Genomes (KEGG)-derived pathways to identify affected cellular processes and develop a …	KCNMB4	Gene	0.9972524046897888
57_snps_association_genetic_polymorphisms	Autism spectrum disorder (ASD) depends on a clinical interview with no biomarkers to aid diagnosis. The current investigation interrogated single-nucleotide polymorphisms (SNPs) of individuals with ASD from the Autism Genetic Resource Exchange (AGRE) database. SNPs were mapped to Kyoto Encyclopedia of Genes and Genomes (KEGG)-derived pathways to identify affected cellular processes and develop a …	GNAO1	Gene	0.9987578392028809
57_snps_association_genetic_polymorphisms	Autism spectrum disorder (ASD) depends on a clinical interview with no biomarkers to aid diagnosis. The current investigation interrogated single-nucleotide polymorphisms (SNPs) of individuals with ASD from the Autism Genetic Resource Exchange (AGRE) database. SNPs were mapped to Kyoto Encyclopedia of Genes and Genomes (KEGG)-derived pathways to identify affected cellular processes and develop a …	GRM5	Gene	0.9915739893913269
16_deletion_duplication_16p11_22q11	Disturbances in the form of microduplications and microdeletions have been found throughout the genome and have been associated with autism, intellectual disability, and recognizable malformation syndromes. In our study of 187 probands with autism, we have identified a duplication in Xq25 including full gene duplication of OCRL and six flanking genes. Activity of the enzyme gene product in fibrob…	OCRL	Gene	0.8567519187927246
16_deletion_duplication_16p11_22q11	Jacobsen syndrome (JS) is a rare contiguous gene disorder characterized by a deletion within the distal part of the long arm of chromosome 11 ranging in size from 7 to 20 Mb. The clinical findings include characteristic dysmorphic features, growth and psychomotor delays and developmental anomalies involving the brain, eyes, heart, kidneys, immune, hematologic, endocrine, and gastrointestinal syst…	KIRREL3	Gene	0.9938297867774963
2_synaptic_genes_mice_protein	Mutations in the synaptic adhesion protein CADM1 (RA175/SynCAM1) are associated with autism spectrum disorder (ASD), a neurodevelopmental disorder of uncertain molecular origin. Cadm1-knock out (KO) mice exhibit smaller cerebella with decreased number of synapse of Purkinje cells and some ASD-like symptoms, including impaired ultrasonic vocalization. In this study, we examined the alteration of t…	CADM1	Gene	0.7645155191421509
2_synaptic_genes_mice_protein	Mutations in the synaptic adhesion protein CADM1 (RA175/SynCAM1) are associated with autism spectrum disorder (ASD), a neurodevelopmental disorder of uncertain molecular origin. Cadm1-knock out (KO) mice exhibit smaller cerebella with decreased number of synapse of Purkinje cells and some ASD-like symptoms, including impaired ultrasonic vocalization. In this study, we examined the alteration of t…	RA175	Gene	0.8822266459465027
2_synaptic_genes_mice_protein	Mutations in the synaptic adhesion protein CADM1 (RA175/SynCAM1) are associated with autism spectrum disorder (ASD), a neurodevelopmental disorder of uncertain molecular origin. Cadm1-knock out (KO) mice exhibit smaller cerebella with decreased number of synapse of Purkinje cells and some ASD-like symptoms, including impaired ultrasonic vocalization. In this study, we examined the alteration of t…	SynCAM1	Gene	0.9602934718132019
2_synaptic_genes_mice_protein	Mutations in the synaptic adhesion protein CADM1 (RA175/SynCAM1) are associated with autism spectrum disorder (ASD), a neurodevelopmental disorder of uncertain molecular origin. Cadm1-knock out (KO) mice exhibit smaller cerebella with decreased number of synapse of Purkinje cells and some ASD-like symptoms, including impaired ultrasonic vocalization. In this study, we examined the alteration of t…	Cadm1-knock	Gene	0.8190160989761353
2_synaptic_genes_mice_protein	Mutations in the synaptic adhesion protein CADM1 (RA175/SynCAM1) are associated with autism spectrum disorder (ASD), a neurodevelopmental disorder of uncertain molecular origin. Cadm1-knock out (KO) mice exhibit smaller cerebella with decreased number of synapse of Purkinje cells and some ASD-like symptoms, including impaired ultrasonic vocalization. In this study, we examined the alteration of t…	Cadm1	Gene	0.9941743016242981
2_synaptic_genes_mice_protein	Mutations in the synaptic adhesion protein CADM1 (RA175/SynCAM1) are associated with autism spectrum disorder (ASD), a neurodevelopmental disorder of uncertain molecular origin. Cadm1-knock out (KO) mice exhibit smaller cerebella with decreased number of synapse of Purkinje cells and some ASD-like symptoms, including impaired ultrasonic vocalization. In this study, we examined the alteration of t…	Cadm1	Gene	0.9976031184196472
2_synaptic_genes_mice_protein	Mutations in the synaptic adhesion protein CADM1 (RA175/SynCAM1) are associated with autism spectrum disorder (ASD), a neurodevelopmental disorder of uncertain molecular origin. Cadm1-knock out (KO) mice exhibit smaller cerebella with decreased number of synapse of Purkinje cells and some ASD-like symptoms, including impaired ultrasonic vocalization. In this study, we examined the alteration of t…	Mupp1	Gene	0.9943262934684753
2_synaptic_genes_mice_protein	Mutations in the synaptic adhesion protein CADM1 (RA175/SynCAM1) are associated with autism spectrum disorder (ASD), a neurodevelopmental disorder of uncertain molecular origin. Cadm1-knock out (KO) mice exhibit smaller cerebella with decreased number of synapse of Purkinje cells and some ASD-like symptoms, including impaired ultrasonic vocalization. In this study, we examined the alteration of t…	PSD-95	Gene	0.9802390933036804
2_synaptic_genes_mice_protein	Mutations in the synaptic adhesion protein CADM1 (RA175/SynCAM1) are associated with autism spectrum disorder (ASD), a neurodevelopmental disorder of uncertain molecular origin. Cadm1-knock out (KO) mice exhibit smaller cerebella with decreased number of synapse of Purkinje cells and some ASD-like symptoms, including impaired ultrasonic vocalization. In this study, we examined the alteration of t…	Dlg	Gene	0.9820390343666077
2_synaptic_genes_mice_protein	Mutations in the synaptic adhesion protein CADM1 (RA175/SynCAM1) are associated with autism spectrum disorder (ASD), a neurodevelopmental disorder of uncertain molecular origin. Cadm1-knock out (KO) mice exhibit smaller cerebella with decreased number of synapse of Purkinje cells and some ASD-like symptoms, including impaired ultrasonic vocalization. In this study, we examined the alteration of t…	ZO-1	Gene	0.9786045551300049
2_synaptic_genes_mice_protein	Mutations in the synaptic adhesion protein CADM1 (RA175/SynCAM1) are associated with autism spectrum disorder (ASD), a neurodevelopmental disorder of uncertain molecular origin. Cadm1-knock out (KO) mice exhibit smaller cerebella with decreased number of synapse of Purkinje cells and some ASD-like symptoms, including impaired ultrasonic vocalization. In this study, we examined the alteration of t…	gamma-aminobutyric acid type B receptor (GABBR)2	Gene	0.6161402828163571
2_synaptic_genes_mice_protein	Mutations in the synaptic adhesion protein CADM1 (RA175/SynCAM1) are associated with autism spectrum disorder (ASD), a neurodevelopmental disorder of uncertain molecular origin. Cadm1-knock out (KO) mice exhibit smaller cerebella with decreased number of synapse of Purkinje cells and some ASD-like symptoms, including impaired ultrasonic vocalization. In this study, we examined the alteration of t…	PDZ13	Gene	0.6769478917121887
2_synaptic_genes_mice_protein	Mutations in the synaptic adhesion protein CADM1 (RA175/SynCAM1) are associated with autism spectrum disorder (ASD), a neurodevelopmental disorder of uncertain molecular origin. Cadm1-knock out (KO) mice exhibit smaller cerebella with decreased number of synapse of Purkinje cells and some ASD-like symptoms, including impaired ultrasonic vocalization. In this study, we examined the alteration of t…	PSD-95	Gene	0.9935397505760193
2_synaptic_genes_mice_protein	Mutations in the synaptic adhesion protein CADM1 (RA175/SynCAM1) are associated with autism spectrum disorder (ASD), a neurodevelopmental disorder of uncertain molecular origin. Cadm1-knock out (KO) mice exhibit smaller cerebella with decreased number of synapse of Purkinje cells and some ASD-like symptoms, including impaired ultrasonic vocalization. In this study, we examined the alteration of t…	GABBR2	Gene	0.9944620728492737
2_synaptic_genes_mice_protein	Mutations in the synaptic adhesion protein CADM1 (RA175/SynCAM1) are associated with autism spectrum disorder (ASD), a neurodevelopmental disorder of uncertain molecular origin. Cadm1-knock out (KO) mice exhibit smaller cerebella with decreased number of synapse of Purkinje cells and some ASD-like symptoms, including impaired ultrasonic vocalization. In this study, we examined the alteration of t…	Cadm1	Gene	0.9967848062515259
2_synaptic_genes_mice_protein	Mutations in the synaptic adhesion protein CADM1 (RA175/SynCAM1) are associated with autism spectrum disorder (ASD), a neurodevelopmental disorder of uncertain molecular origin. Cadm1-knock out (KO) mice exhibit smaller cerebella with decreased number of synapse of Purkinje cells and some ASD-like symptoms, including impaired ultrasonic vocalization. In this study, we examined the alteration of t…	Cadm1	Gene	0.9965740442276001
2_synaptic_genes_mice_protein	Mutations in the synaptic adhesion protein CADM1 (RA175/SynCAM1) are associated with autism spectrum disorder (ASD), a neurodevelopmental disorder of uncertain molecular origin. Cadm1-knock out (KO) mice exhibit smaller cerebella with decreased number of synapse of Purkinje cells and some ASD-like symptoms, including impaired ultrasonic vocalization. In this study, we examined the alteration of t…	Mupp1	Gene	0.9968673586845398
2_synaptic_genes_mice_protein	Mutations in the synaptic adhesion protein CADM1 (RA175/SynCAM1) are associated with autism spectrum disorder (ASD), a neurodevelopmental disorder of uncertain molecular origin. Cadm1-knock out (KO) mice exhibit smaller cerebella with decreased number of synapse of Purkinje cells and some ASD-like symptoms, including impaired ultrasonic vocalization. In this study, we examined the alteration of t…	GABBR2	Gene	0.9972363710403442
2_synaptic_genes_mice_protein	Mutations in the synaptic adhesion protein CADM1 (RA175/SynCAM1) are associated with autism spectrum disorder (ASD), a neurodevelopmental disorder of uncertain molecular origin. Cadm1-knock out (KO) mice exhibit smaller cerebella with decreased number of synapse of Purkinje cells and some ASD-like symptoms, including impaired ultrasonic vocalization. In this study, we examined the alteration of t…	Cadm1	Gene	0.9856798648834229
2_synaptic_genes_mice_protein	Mutations in the synaptic adhesion protein CADM1 (RA175/SynCAM1) are associated with autism spectrum disorder (ASD), a neurodevelopmental disorder of uncertain molecular origin. Cadm1-knock out (KO) mice exhibit smaller cerebella with decreased number of synapse of Purkinje cells and some ASD-like symptoms, including impaired ultrasonic vocalization. In this study, we examined the alteration of t…	Mupp1-GABBR2	Gene	0.9214198589324951
2_synaptic_genes_mice_protein	Mutations in the synaptic adhesion protein CADM1 (RA175/SynCAM1) are associated with autism spectrum disorder (ASD), a neurodevelopmental disorder of uncertain molecular origin. Cadm1-knock out (KO) mice exhibit smaller cerebella with decreased number of synapse of Purkinje cells and some ASD-like symptoms, including impaired ultrasonic vocalization. In this study, we examined the alteration of t…	GABBR2	Gene	0.991903
2_synaptic_genes_mice_protein	Mutations in the synaptic adhesion protein CADM1 (RA175/SynCAM1) are associated with autism spectrum disorder (ASD), a neurodevelopmental disorder of uncertain molecular origin. Cadm1-knock out (KO) mice exhibit smaller cerebella with decreased number of synapse of Purkinje cells and some ASD-like symptoms, including impaired ultrasonic vocalization. In this study, we examined the alteration of t…	Cadm1	Gene	0.9955163598060608
2_synaptic_genes_mice_protein	Mutations in the synaptic adhesion protein CADM1 (RA175/SynCAM1) are associated with autism spectrum disorder (ASD), a neurodevelopmental disorder of uncertain molecular origin. Cadm1-knock out (KO) mice exhibit smaller cerebella with decreased number of synapse of Purkinje cells and some ASD-like symptoms, including impaired ultrasonic vocalization. In this study, we examined the alteration of t…	Cadm1	Gene	0.995902
2_synaptic_genes_mice_protein	Mutations in the synaptic adhesion protein CADM1 (RA175/SynCAM1) are associated with autism spectrum disorder (ASD), a neurodevelopmental disorder of uncertain molecular origin. Cadm1-knock out (KO) mice exhibit smaller cerebella with decreased number of synapse of Purkinje cells and some ASD-like symptoms, including impaired ultrasonic vocalization. In this study, we examined the alteration of t…	GABBR2	Gene	0.9926356673240662
2_synaptic_genes_mice_protein	Mutations in the synaptic adhesion protein CADM1 (RA175/SynCAM1) are associated with autism spectrum disorder (ASD), a neurodevelopmental disorder of uncertain molecular origin. Cadm1-knock out (KO) mice exhibit smaller cerebella with decreased number of synapse of Purkinje cells and some ASD-like symptoms, including impaired ultrasonic vocalization. In this study, we examined the alteration of t…	Mupp1-GABBR2	Gene	0.9485610127449036
2_synaptic_genes_mice_protein	Mutations in the synaptic adhesion protein CADM1 (RA175/SynCAM1) are associated with autism spectrum disorder (ASD), a neurodevelopmental disorder of uncertain molecular origin. Cadm1-knock out (KO) mice exhibit smaller cerebella with decreased number of synapse of Purkinje cells and some ASD-like symptoms, including impaired ultrasonic vocalization. In this study, we examined the alteration of t…	Mupp1-GABBR2	Gene	0.9629481434822083
2_synaptic_genes_mice_protein	Mutations in the synaptic adhesion protein CADM1 (RA175/SynCAM1) are associated with autism spectrum disorder (ASD), a neurodevelopmental disorder of uncertain molecular origin. Cadm1-knock out (KO) mice exhibit smaller cerebella with decreased number of synapse of Purkinje cells and some ASD-like symptoms, including impaired ultrasonic vocalization. In this study, we examined the alteration of t…	Mupp1	Gene	0.9918646216392517
2_synaptic_genes_mice_protein	Mutations in the synaptic adhesion protein CADM1 (RA175/SynCAM1) are associated with autism spectrum disorder (ASD), a neurodevelopmental disorder of uncertain molecular origin. Cadm1-knock out (KO) mice exhibit smaller cerebella with decreased number of synapse of Purkinje cells and some ASD-like symptoms, including impaired ultrasonic vocalization. In this study, we examined the alteration of t…	GABBR2	Gene	0.9950496554374695
2_synaptic_genes_mice_protein	Mutations in the synaptic adhesion protein CADM1 (RA175/SynCAM1) are associated with autism spectrum disorder (ASD), a neurodevelopmental disorder of uncertain molecular origin. Cadm1-knock out (KO) mice exhibit smaller cerebella with decreased number of synapse of Purkinje cells and some ASD-like symptoms, including impaired ultrasonic vocalization. In this study, we examined the alteration of t…	CADM1	Gene	0.9711323380470276
2_synaptic_genes_mice_protein	Cortactin-binding protein 2 (CTTNBP2) interacts with cortactin to regulate cortactin mobility and control dendritic spine formation. CTTNBP2 has also been associated with autistic spectrum disorder. The regulation of dendritic spinogenesis could explain the association of CTTNBP2 with autism. Sequence comparison has indicated that CTTNBP2 N-terminal-like protein (CTTNBP2NL) is a CTTNBP2 homologue…	Cortactin-binding protein 2	Gene	0.8437406420707703
2_synaptic_genes_mice_protein	Cortactin-binding protein 2 (CTTNBP2) interacts with cortactin to regulate cortactin mobility and control dendritic spine formation. CTTNBP2 has also been associated with autistic spectrum disorder. The regulation of dendritic spinogenesis could explain the association of CTTNBP2 with autism. Sequence comparison has indicated that CTTNBP2 N-terminal-like protein (CTTNBP2NL) is a CTTNBP2 homologue…	CTTNBP2	Gene	0.9914934635162354
2_synaptic_genes_mice_protein	Cortactin-binding protein 2 (CTTNBP2) interacts with cortactin to regulate cortactin mobility and control dendritic spine formation. CTTNBP2 has also been associated with autistic spectrum disorder. The regulation of dendritic spinogenesis could explain the association of CTTNBP2 with autism. Sequence comparison has indicated that CTTNBP2 N-terminal-like protein (CTTNBP2NL) is a CTTNBP2 homologue…	cortactin	Gene	0.9278111457824707
2_synaptic_genes_mice_protein	Cortactin-binding protein 2 (CTTNBP2) interacts with cortactin to regulate cortactin mobility and control dendritic spine formation. CTTNBP2 has also been associated with autistic spectrum disorder. The regulation of dendritic spinogenesis could explain the association of CTTNBP2 with autism. Sequence comparison has indicated that CTTNBP2 N-terminal-like protein (CTTNBP2NL) is a CTTNBP2 homologue…	cortactin	Gene	0.8498262763023376
2_synaptic_genes_mice_protein	Cortactin-binding protein 2 (CTTNBP2) interacts with cortactin to regulate cortactin mobility and control dendritic spine formation. CTTNBP2 has also been associated with autistic spectrum disorder. The regulation of dendritic spinogenesis could explain the association of CTTNBP2 with autism. Sequence comparison has indicated that CTTNBP2 N-terminal-like protein (CTTNBP2NL) is a CTTNBP2 homologue…	CTTNBP2	Gene	0.9973207116127014
2_synaptic_genes_mice_protein	Cortactin-binding protein 2 (CTTNBP2) interacts with cortactin to regulate cortactin mobility and control dendritic spine formation. CTTNBP2 has also been associated with autistic spectrum disorder. The regulation of dendritic spinogenesis could explain the association of CTTNBP2 with autism. Sequence comparison has indicated that CTTNBP2 N-terminal-like protein (CTTNBP2NL) is a CTTNBP2 homologue…	CTTNBP2	Gene	0.9964236617088318
2_synaptic_genes_mice_protein	Cortactin-binding protein 2 (CTTNBP2) interacts with cortactin to regulate cortactin mobility and control dendritic spine formation. CTTNBP2 has also been associated with autistic spectrum disorder. The regulation of dendritic spinogenesis could explain the association of CTTNBP2 with autism. Sequence comparison has indicated that CTTNBP2 N-terminal-like protein (CTTNBP2NL) is a CTTNBP2 homologue…	CTTNBP2	Gene	0.9919859170913696
2_synaptic_genes_mice_protein	Cortactin-binding protein 2 (CTTNBP2) interacts with cortactin to regulate cortactin mobility and control dendritic spine formation. CTTNBP2 has also been associated with autistic spectrum disorder. The regulation of dendritic spinogenesis could explain the association of CTTNBP2 with autism. Sequence comparison has indicated that CTTNBP2 N-terminal-like protein (CTTNBP2NL) is a CTTNBP2 homologue…	CTTNBP2NL	Gene	0.9920852780342102
2_synaptic_genes_mice_protein	Cortactin-binding protein 2 (CTTNBP2) interacts with cortactin to regulate cortactin mobility and control dendritic spine formation. CTTNBP2 has also been associated with autistic spectrum disorder. The regulation of dendritic spinogenesis could explain the association of CTTNBP2 with autism. Sequence comparison has indicated that CTTNBP2 N-terminal-like protein (CTTNBP2NL) is a CTTNBP2 homologue…	CTTNBP2	Gene	0.9695491194725037
2_synaptic_genes_mice_protein	Cortactin-binding protein 2 (CTTNBP2) interacts with cortactin to regulate cortactin mobility and control dendritic spine formation. CTTNBP2 has also been associated with autistic spectrum disorder. The regulation of dendritic spinogenesis could explain the association of CTTNBP2 with autism. Sequence comparison has indicated that CTTNBP2 N-terminal-like protein (CTTNBP2NL) is a CTTNBP2 homologue…	CTTNBP2	Gene	0.9981570839881897
2_synaptic_genes_mice_protein	Cortactin-binding protein 2 (CTTNBP2) interacts with cortactin to regulate cortactin mobility and control dendritic spine formation. CTTNBP2 has also been associated with autistic spectrum disorder. The regulation of dendritic spinogenesis could explain the association of CTTNBP2 with autism. Sequence comparison has indicated that CTTNBP2 N-terminal-like protein (CTTNBP2NL) is a CTTNBP2 homologue…	CTTNBP2NL	Gene	0.9939900636672974
2_synaptic_genes_mice_protein	Cortactin-binding protein 2 (CTTNBP2) interacts with cortactin to regulate cortactin mobility and control dendritic spine formation. CTTNBP2 has also been associated with autistic spectrum disorder. The regulation of dendritic spinogenesis could explain the association of CTTNBP2 with autism. Sequence comparison has indicated that CTTNBP2 N-terminal-like protein (CTTNBP2NL) is a CTTNBP2 homologue…	CTTNBP2	Gene	0.9972489476203918
2_synaptic_genes_mice_protein	Cortactin-binding protein 2 (CTTNBP2) interacts with cortactin to regulate cortactin mobility and control dendritic spine formation. CTTNBP2 has also been associated with autistic spectrum disorder. The regulation of dendritic spinogenesis could explain the association of CTTNBP2 with autism. Sequence comparison has indicated that CTTNBP2 N-terminal-like protein (CTTNBP2NL) is a CTTNBP2 homologue…	CTTNBP2	Gene	0.9978626370429993
2_synaptic_genes_mice_protein	Cortactin-binding protein 2 (CTTNBP2) interacts with cortactin to regulate cortactin mobility and control dendritic spine formation. CTTNBP2 has also been associated with autistic spectrum disorder. The regulation of dendritic spinogenesis could explain the association of CTTNBP2 with autism. Sequence comparison has indicated that CTTNBP2 N-terminal-like protein (CTTNBP2NL) is a CTTNBP2 homologue…	CTTNBP2NL	Gene	0.9950993657112122
2_synaptic_genes_mice_protein	Cortactin-binding protein 2 (CTTNBP2) interacts with cortactin to regulate cortactin mobility and control dendritic spine formation. CTTNBP2 has also been associated with autistic spectrum disorder. The regulation of dendritic spinogenesis could explain the association of CTTNBP2 with autism. Sequence comparison has indicated that CTTNBP2 N-terminal-like protein (CTTNBP2NL) is a CTTNBP2 homologue…	cortactin	Gene	0.9470447301864624
2_synaptic_genes_mice_protein	Cortactin-binding protein 2 (CTTNBP2) interacts with cortactin to regulate cortactin mobility and control dendritic spine formation. CTTNBP2 has also been associated with autistic spectrum disorder. The regulation of dendritic spinogenesis could explain the association of CTTNBP2 with autism. Sequence comparison has indicated that CTTNBP2 N-terminal-like protein (CTTNBP2NL) is a CTTNBP2 homologue…	CTTNBP2NL	Gene	0.9924618601799011
2_synaptic_genes_mice_protein	Cortactin-binding protein 2 (CTTNBP2) interacts with cortactin to regulate cortactin mobility and control dendritic spine formation. CTTNBP2 has also been associated with autistic spectrum disorder. The regulation of dendritic spinogenesis could explain the association of CTTNBP2 with autism. Sequence comparison has indicated that CTTNBP2 N-terminal-like protein (CTTNBP2NL) is a CTTNBP2 homologue…	CTTNBP2	Gene	0.9980066418647766
2_synaptic_genes_mice_protein	Cortactin-binding protein 2 (CTTNBP2) interacts with cortactin to regulate cortactin mobility and control dendritic spine formation. CTTNBP2 has also been associated with autistic spectrum disorder. The regulation of dendritic spinogenesis could explain the association of CTTNBP2 with autism. Sequence comparison has indicated that CTTNBP2 N-terminal-like protein (CTTNBP2NL) is a CTTNBP2 homologue…	CTTNBP2	Gene	0.9963973164558411
2_synaptic_genes_mice_protein	Cortactin-binding protein 2 (CTTNBP2) interacts with cortactin to regulate cortactin mobility and control dendritic spine formation. CTTNBP2 has also been associated with autistic spectrum disorder. The regulation of dendritic spinogenesis could explain the association of CTTNBP2 with autism. Sequence comparison has indicated that CTTNBP2 N-terminal-like protein (CTTNBP2NL) is a CTTNBP2 homologue…	CTTNBP2NL	Gene	0.9884415864944458
2_synaptic_genes_mice_protein	Cortactin-binding protein 2 (CTTNBP2) interacts with cortactin to regulate cortactin mobility and control dendritic spine formation. CTTNBP2 has also been associated with autistic spectrum disorder. The regulation of dendritic spinogenesis could explain the association of CTTNBP2 with autism. Sequence comparison has indicated that CTTNBP2 N-terminal-like protein (CTTNBP2NL) is a CTTNBP2 homologue…	CTTNBP2NL	Gene	0.9954912066459656
2_synaptic_genes_mice_protein	Cortactin-binding protein 2 (CTTNBP2) interacts with cortactin to regulate cortactin mobility and control dendritic spine formation. CTTNBP2 has also been associated with autistic spectrum disorder. The regulation of dendritic spinogenesis could explain the association of CTTNBP2 with autism. Sequence comparison has indicated that CTTNBP2 N-terminal-like protein (CTTNBP2NL) is a CTTNBP2 homologue…	CTTNBP2	Gene	0.9979251623153687
2_synaptic_genes_mice_protein	Cortactin-binding protein 2 (CTTNBP2) interacts with cortactin to regulate cortactin mobility and control dendritic spine formation. CTTNBP2 has also been associated with autistic spectrum disorder. The regulation of dendritic spinogenesis could explain the association of CTTNBP2 with autism. Sequence comparison has indicated that CTTNBP2 N-terminal-like protein (CTTNBP2NL) is a CTTNBP2 homologue…	striatin	Gene	0.8570429682731628
2_synaptic_genes_mice_protein	Cortactin-binding protein 2 (CTTNBP2) interacts with cortactin to regulate cortactin mobility and control dendritic spine formation. CTTNBP2 has also been associated with autistic spectrum disorder. The regulation of dendritic spinogenesis could explain the association of CTTNBP2 with autism. Sequence comparison has indicated that CTTNBP2 N-terminal-like protein (CTTNBP2NL) is a CTTNBP2 homologue…	zinedin	Gene	0.9513077735900879
2_synaptic_genes_mice_protein	Cortactin-binding protein 2 (CTTNBP2) interacts with cortactin to regulate cortactin mobility and control dendritic spine formation. CTTNBP2 has also been associated with autistic spectrum disorder. The regulation of dendritic spinogenesis could explain the association of CTTNBP2 with autism. Sequence comparison has indicated that CTTNBP2 N-terminal-like protein (CTTNBP2NL) is a CTTNBP2 homologue…	protein phosphatase 2A	Gene	0.7436828215916952
2_synaptic_genes_mice_protein	Cortactin-binding protein 2 (CTTNBP2) interacts with cortactin to regulate cortactin mobility and control dendritic spine formation. CTTNBP2 has also been associated with autistic spectrum disorder. The regulation of dendritic spinogenesis could explain the association of CTTNBP2 with autism. Sequence comparison has indicated that CTTNBP2 N-terminal-like protein (CTTNBP2NL) is a CTTNBP2 homologue…	PP2A	Gene	0.7872350215911865
2_synaptic_genes_mice_protein	Cortactin-binding protein 2 (CTTNBP2) interacts with cortactin to regulate cortactin mobility and control dendritic spine formation. CTTNBP2 has also been associated with autistic spectrum disorder. The regulation of dendritic spinogenesis could explain the association of CTTNBP2 with autism. Sequence comparison has indicated that CTTNBP2 N-terminal-like protein (CTTNBP2NL) is a CTTNBP2 homologue…	CTTNBP2NL	Gene	0.9773783683776855
2_synaptic_genes_mice_protein	Cortactin-binding protein 2 (CTTNBP2) interacts with cortactin to regulate cortactin mobility and control dendritic spine formation. CTTNBP2 has also been associated with autistic spectrum disorder. The regulation of dendritic spinogenesis could explain the association of CTTNBP2 with autism. Sequence comparison has indicated that CTTNBP2 N-terminal-like protein (CTTNBP2NL) is a CTTNBP2 homologue…	CTTNBP2	Gene	0.9953482747077942
2_synaptic_genes_mice_protein	Cortactin-binding protein 2 (CTTNBP2) interacts with cortactin to regulate cortactin mobility and control dendritic spine formation. CTTNBP2 has also been associated with autistic spectrum disorder. The regulation of dendritic spinogenesis could explain the association of CTTNBP2 with autism. Sequence comparison has indicated that CTTNBP2 N-terminal-like protein (CTTNBP2NL) is a CTTNBP2 homologue…	striatin	Gene	0.8658129572868347
2_synaptic_genes_mice_protein	Cortactin-binding protein 2 (CTTNBP2) interacts with cortactin to regulate cortactin mobility and control dendritic spine formation. CTTNBP2 has also been associated with autistic spectrum disorder. The regulation of dendritic spinogenesis could explain the association of CTTNBP2 with autism. Sequence comparison has indicated that CTTNBP2 N-terminal-like protein (CTTNBP2NL) is a CTTNBP2 homologue…	zinedin	Gene	0.8431180119514465
2_synaptic_genes_mice_protein	Cortactin-binding protein 2 (CTTNBP2) interacts with cortactin to regulate cortactin mobility and control dendritic spine formation. CTTNBP2 has also been associated with autistic spectrum disorder. The regulation of dendritic spinogenesis could explain the association of CTTNBP2 with autism. Sequence comparison has indicated that CTTNBP2 N-terminal-like protein (CTTNBP2NL) is a CTTNBP2 homologue…	CTTNBP2	Gene	0.995592
2_synaptic_genes_mice_protein	Cortactin-binding protein 2 (CTTNBP2) interacts with cortactin to regulate cortactin mobility and control dendritic spine formation. CTTNBP2 has also been associated with autistic spectrum disorder. The regulation of dendritic spinogenesis could explain the association of CTTNBP2 with autism. Sequence comparison has indicated that CTTNBP2 N-terminal-like protein (CTTNBP2NL) is a CTTNBP2 homologue…	PP2A	Gene	0.5582463145256042
2_synaptic_genes_mice_protein	Cortactin-binding protein 2 (CTTNBP2) interacts with cortactin to regulate cortactin mobility and control dendritic spine formation. CTTNBP2 has also been associated with autistic spectrum disorder. The regulation of dendritic spinogenesis could explain the association of CTTNBP2 with autism. Sequence comparison has indicated that CTTNBP2 N-terminal-like protein (CTTNBP2NL) is a CTTNBP2 homologue…	CTTNBP2	Gene	0.9945823550224304
2_synaptic_genes_mice_protein	Cortactin-binding protein 2 (CTTNBP2) interacts with cortactin to regulate cortactin mobility and control dendritic spine formation. CTTNBP2 has also been associated with autistic spectrum disorder. The regulation of dendritic spinogenesis could explain the association of CTTNBP2 with autism. Sequence comparison has indicated that CTTNBP2 N-terminal-like protein (CTTNBP2NL) is a CTTNBP2 homologue…	cortactin	Gene	0.9305287599563599
2_synaptic_genes_mice_protein	Cortactin-binding protein 2 (CTTNBP2) interacts with cortactin to regulate cortactin mobility and control dendritic spine formation. CTTNBP2 has also been associated with autistic spectrum disorder. The regulation of dendritic spinogenesis could explain the association of CTTNBP2 with autism. Sequence comparison has indicated that CTTNBP2 N-terminal-like protein (CTTNBP2NL) is a CTTNBP2 homologue…	PP2A	Gene	0.5595999360084534
16_deletion_duplication_16p11_22q11	Deletions and duplications of the PAFAH1B1 and YWHAE genes in 17p13.3 are associated with different clinical phenotypes. In particular, deletion of PAFAH1B1 causes isolated lissencephaly while deletions involving both PAFAH1B1 and YWHAE cause Miller-Dieker syndrome. Isolated duplications of PAFAH1B1 have been associated with mild developmental delay and hypotonia, while isolated duplications of Y…	PAFAH1B1	Gene	0.9833990335464478
16_deletion_duplication_16p11_22q11	Deletions and duplications of the PAFAH1B1 and YWHAE genes in 17p13.3 are associated with different clinical phenotypes. In particular, deletion of PAFAH1B1 causes isolated lissencephaly while deletions involving both PAFAH1B1 and YWHAE cause Miller-Dieker syndrome. Isolated duplications of PAFAH1B1 have been associated with mild developmental delay and hypotonia, while isolated duplications of Y…	YWHAE	Gene	0.9467657804489136
16_deletion_duplication_16p11_22q11	Deletions and duplications of the PAFAH1B1 and YWHAE genes in 17p13.3 are associated with different clinical phenotypes. In particular, deletion of PAFAH1B1 causes isolated lissencephaly while deletions involving both PAFAH1B1 and YWHAE cause Miller-Dieker syndrome. Isolated duplications of PAFAH1B1 have been associated with mild developmental delay and hypotonia, while isolated duplications of Y…	PAFAH1B1	Gene	0.9964011907577515
16_deletion_duplication_16p11_22q11	Deletions and duplications of the PAFAH1B1 and YWHAE genes in 17p13.3 are associated with different clinical phenotypes. In particular, deletion of PAFAH1B1 causes isolated lissencephaly while deletions involving both PAFAH1B1 and YWHAE cause Miller-Dieker syndrome. Isolated duplications of PAFAH1B1 have been associated with mild developmental delay and hypotonia, while isolated duplications of Y…	PAFAH1B1	Gene	0.9950523972511292
16_deletion_duplication_16p11_22q11	Deletions and duplications of the PAFAH1B1 and YWHAE genes in 17p13.3 are associated with different clinical phenotypes. In particular, deletion of PAFAH1B1 causes isolated lissencephaly while deletions involving both PAFAH1B1 and YWHAE cause Miller-Dieker syndrome. Isolated duplications of PAFAH1B1 have been associated with mild developmental delay and hypotonia, while isolated duplications of Y…	YWHAE	Gene	0.9693710207939148
16_deletion_duplication_16p11_22q11	Deletions and duplications of the PAFAH1B1 and YWHAE genes in 17p13.3 are associated with different clinical phenotypes. In particular, deletion of PAFAH1B1 causes isolated lissencephaly while deletions involving both PAFAH1B1 and YWHAE cause Miller-Dieker syndrome. Isolated duplications of PAFAH1B1 have been associated with mild developmental delay and hypotonia, while isolated duplications of Y…	PAFAH1B1	Gene	0.9943907856941223
16_deletion_duplication_16p11_22q11	Deletions and duplications of the PAFAH1B1 and YWHAE genes in 17p13.3 are associated with different clinical phenotypes. In particular, deletion of PAFAH1B1 causes isolated lissencephaly while deletions involving both PAFAH1B1 and YWHAE cause Miller-Dieker syndrome. Isolated duplications of PAFAH1B1 have been associated with mild developmental delay and hypotonia, while isolated duplications of Y…	YWHAE	Gene	0.9643111228942871
16_deletion_duplication_16p11_22q11	Deletions and duplications of the PAFAH1B1 and YWHAE genes in 17p13.3 are associated with different clinical phenotypes. In particular, deletion of PAFAH1B1 causes isolated lissencephaly while deletions involving both PAFAH1B1 and YWHAE cause Miller-Dieker syndrome. Isolated duplications of PAFAH1B1 have been associated with mild developmental delay and hypotonia, while isolated duplications of Y…	PAFAH1B1	Gene	0.9957252740859985
16_deletion_duplication_16p11_22q11	Deletions and duplications of the PAFAH1B1 and YWHAE genes in 17p13.3 are associated with different clinical phenotypes. In particular, deletion of PAFAH1B1 causes isolated lissencephaly while deletions involving both PAFAH1B1 and YWHAE cause Miller-Dieker syndrome. Isolated duplications of PAFAH1B1 have been associated with mild developmental delay and hypotonia, while isolated duplications of Y…	YWHAE	Gene	0.9846264719963074
16_deletion_duplication_16p11_22q11	Deletions and duplications of the PAFAH1B1 and YWHAE genes in 17p13.3 are associated with different clinical phenotypes. In particular, deletion of PAFAH1B1 causes isolated lissencephaly while deletions involving both PAFAH1B1 and YWHAE cause Miller-Dieker syndrome. Isolated duplications of PAFAH1B1 have been associated with mild developmental delay and hypotonia, while isolated duplications of Y…	YWHAE	Gene	0.9737647175788879
16_deletion_duplication_16p11_22q11	Deletions and duplications of the PAFAH1B1 and YWHAE genes in 17p13.3 are associated with different clinical phenotypes. In particular, deletion of PAFAH1B1 causes isolated lissencephaly while deletions involving both PAFAH1B1 and YWHAE cause Miller-Dieker syndrome. Isolated duplications of PAFAH1B1 have been associated with mild developmental delay and hypotonia, while isolated duplications of Y…	PAFAH1B1	Gene	0.99192
16_deletion_duplication_16p11_22q11	Deletions and duplications of the PAFAH1B1 and YWHAE genes in 17p13.3 are associated with different clinical phenotypes. In particular, deletion of PAFAH1B1 causes isolated lissencephaly while deletions involving both PAFAH1B1 and YWHAE cause Miller-Dieker syndrome. Isolated duplications of PAFAH1B1 have been associated with mild developmental delay and hypotonia, while isolated duplications of Y…	BHLHA9	Gene	0.9792768359184265
16_deletion_duplication_16p11_22q11	Deletions and duplications of the PAFAH1B1 and YWHAE genes in 17p13.3 are associated with different clinical phenotypes. In particular, deletion of PAFAH1B1 causes isolated lissencephaly while deletions involving both PAFAH1B1 and YWHAE cause Miller-Dieker syndrome. Isolated duplications of PAFAH1B1 have been associated with mild developmental delay and hypotonia, while isolated duplications of Y…	YWHAE	Gene	0.9833182096481323
16_deletion_duplication_16p11_22q11	Deletions and duplications of the PAFAH1B1 and YWHAE genes in 17p13.3 are associated with different clinical phenotypes. In particular, deletion of PAFAH1B1 causes isolated lissencephaly while deletions involving both PAFAH1B1 and YWHAE cause Miller-Dieker syndrome. Isolated duplications of PAFAH1B1 have been associated with mild developmental delay and hypotonia, while isolated duplications of Y…	CRK	Gene	0.9471703767776489
16_deletion_duplication_16p11_22q11	Deletions and duplications of the PAFAH1B1 and YWHAE genes in 17p13.3 are associated with different clinical phenotypes. In particular, deletion of PAFAH1B1 causes isolated lissencephaly while deletions involving both PAFAH1B1 and YWHAE cause Miller-Dieker syndrome. Isolated duplications of PAFAH1B1 have been associated with mild developmental delay and hypotonia, while isolated duplications of Y…	BHLHA9	Gene	0.9781646728515625
16_deletion_duplication_16p11_22q11	Deletions and duplications of the PAFAH1B1 and YWHAE genes in 17p13.3 are associated with different clinical phenotypes. In particular, deletion of PAFAH1B1 causes isolated lissencephaly while deletions involving both PAFAH1B1 and YWHAE cause Miller-Dieker syndrome. Isolated duplications of PAFAH1B1 have been associated with mild developmental delay and hypotonia, while isolated duplications of Y…	YWHAE	Gene	0.9785221219062805
16_deletion_duplication_16p11_22q11	Deletions and duplications of the PAFAH1B1 and YWHAE genes in 17p13.3 are associated with different clinical phenotypes. In particular, deletion of PAFAH1B1 causes isolated lissencephaly while deletions involving both PAFAH1B1 and YWHAE cause Miller-Dieker syndrome. Isolated duplications of PAFAH1B1 have been associated with mild developmental delay and hypotonia, while isolated duplications of Y…	CRK	Gene	0.9597249031066895
16_deletion_duplication_16p11_22q11	Although discordant phenotypes in monozygotic twins with developmental disorder are not an exception, underlying genetic discordance is rarely reported. Here, we report on the clinical and cytogenetic details of 4-year-old female monozygotic twins with discordant phenotypes. Twin 1 exhibited global developmental delay, overweight and hyperactivity. Twin 2 had an autistic spectrum disorder. Molecu…	MYTL1L	Gene	0.895194
16_deletion_duplication_16p11_22q11	Although discordant phenotypes in monozygotic twins with developmental disorder are not an exception, underlying genetic discordance is rarely reported. Here, we report on the clinical and cytogenetic details of 4-year-old female monozygotic twins with discordant phenotypes. Twin 1 exhibited global developmental delay, overweight and hyperactivity. Twin 2 had an autistic spectrum disorder. Molecu…	SNTG2	Gene	0.937311
16_deletion_duplication_16p11_22q11	While deletion of chromosome 17p13.3 (encompassing PAFAH1B1 and YWHAE genes) is known to result in Miller-Dieker syndrome (OMIM 247200), 17p13.3 microduplication gives rise to a condition commonly associated with developmental delay and autism spectrum disorder. We report a Chinese newborn presenting with dysmorphic features, microcephaly and valvar aortic stenosis, who was confirmed to have a 79…	PAFAH1B1	Gene	0.9904698133468628
16_deletion_duplication_16p11_22q11	While deletion of chromosome 17p13.3 (encompassing PAFAH1B1 and YWHAE genes) is known to result in Miller-Dieker syndrome (OMIM 247200), 17p13.3 microduplication gives rise to a condition commonly associated with developmental delay and autism spectrum disorder. We report a Chinese newborn presenting with dysmorphic features, microcephaly and valvar aortic stenosis, who was confirmed to have a 79…	YWHAE	Gene	0.9356303215026855
41_variants_sequencing_exome_variant	We studied a unique phenotype of cognitive delay, autistic behavior, and gait instability segregating in three separate sibships. We initiated genome-wide mapping in two sibships using Affymetrix 10K SNP Mapping Arrays and identified a homozygous 8.2 Mb region on chromosome 15 common to five affected children. We used exome sequencing of two affected children to assess coding sequence variants wi…	HERC2	Gene	0.994107
41_variants_sequencing_exome_variant	We studied a unique phenotype of cognitive delay, autistic behavior, and gait instability segregating in three separate sibships. We initiated genome-wide mapping in two sibships using Affymetrix 10K SNP Mapping Arrays and identified a homozygous 8.2 Mb region on chromosome 15 common to five affected children. We used exome sequencing of two affected children to assess coding sequence variants wi…	RCC1-like	Gene	0.6118297576904297
41_variants_sequencing_exome_variant	We studied a unique phenotype of cognitive delay, autistic behavior, and gait instability segregating in three separate sibships. We initiated genome-wide mapping in two sibships using Affymetrix 10K SNP Mapping Arrays and identified a homozygous 8.2 Mb region on chromosome 15 common to five affected children. We used exome sequencing of two affected children to assess coding sequence variants wi…	HERC2	Gene	0.9852720499038696
41_variants_sequencing_exome_variant	We studied a unique phenotype of cognitive delay, autistic behavior, and gait instability segregating in three separate sibships. We initiated genome-wide mapping in two sibships using Affymetrix 10K SNP Mapping Arrays and identified a homozygous 8.2 Mb region on chromosome 15 common to five affected children. We used exome sequencing of two affected children to assess coding sequence variants wi…	HERC2	Gene	0.979979
41_variants_sequencing_exome_variant	We studied a unique phenotype of cognitive delay, autistic behavior, and gait instability segregating in three separate sibships. We initiated genome-wide mapping in two sibships using Affymetrix 10K SNP Mapping Arrays and identified a homozygous 8.2 Mb region on chromosome 15 common to five affected children. We used exome sequencing of two affected children to assess coding sequence variants wi…	Herc1	Gene	0.9500875473022461
41_variants_sequencing_exome_variant	We studied a unique phenotype of cognitive delay, autistic behavior, and gait instability segregating in three separate sibships. We initiated genome-wide mapping in two sibships using Affymetrix 10K SNP Mapping Arrays and identified a homozygous 8.2 Mb region on chromosome 15 common to five affected children. We used exome sequencing of two affected children to assess coding sequence variants wi…	Herc2	Gene	0.9916765689849854
41_variants_sequencing_exome_variant	We studied a unique phenotype of cognitive delay, autistic behavior, and gait instability segregating in three separate sibships. We initiated genome-wide mapping in two sibships using Affymetrix 10K SNP Mapping Arrays and identified a homozygous 8.2 Mb region on chromosome 15 common to five affected children. We used exome sequencing of two affected children to assess coding sequence variants wi…	HERC2	Gene	0.9753398299217224
2_synaptic_genes_mice_protein	Neuroligins (NLs) are postsynaptic membrane proteins expressed in the brain and mediate synaptogenesis. Neuroligin family proteins can specifically induce either excitatory or inhibitory synapses. Deletions or point mutations in neuroligin genes are found in patients with autism spectrum disorders (ASD) or mental retardations. The dysfunctions of these mutations have been tested in multiple neuro…	Neuroligins	Gene	0.7059187889099121
2_synaptic_genes_mice_protein	Neuroligins (NLs) are postsynaptic membrane proteins expressed in the brain and mediate synaptogenesis. Neuroligin family proteins can specifically induce either excitatory or inhibitory synapses. Deletions or point mutations in neuroligin genes are found in patients with autism spectrum disorders (ASD) or mental retardations. The dysfunctions of these mutations have been tested in multiple neuro…	NLs	Gene	0.6551294922828674
2_synaptic_genes_mice_protein	Neuroligins (NLs) are postsynaptic membrane proteins expressed in the brain and mediate synaptogenesis. Neuroligin family proteins can specifically induce either excitatory or inhibitory synapses. Deletions or point mutations in neuroligin genes are found in patients with autism spectrum disorders (ASD) or mental retardations. The dysfunctions of these mutations have been tested in multiple neuro…	neuroligin	Gene	0.6868986487388611
2_synaptic_genes_mice_protein	Neuroligins (NLs) are postsynaptic membrane proteins expressed in the brain and mediate synaptogenesis. Neuroligin family proteins can specifically induce either excitatory or inhibitory synapses. Deletions or point mutations in neuroligin genes are found in patients with autism spectrum disorders (ASD) or mental retardations. The dysfunctions of these mutations have been tested in multiple neuro…	NL3	Gene	0.7917501330375671
2_synaptic_genes_mice_protein	Neuroligins (NLs) are postsynaptic membrane proteins expressed in the brain and mediate synaptogenesis. Neuroligin family proteins can specifically induce either excitatory or inhibitory synapses. Deletions or point mutations in neuroligin genes are found in patients with autism spectrum disorders (ASD) or mental retardations. The dysfunctions of these mutations have been tested in multiple neuro…	NL4	Gene	0.7138169407844543
2_synaptic_genes_mice_protein	Neuroligins (NLs) are postsynaptic membrane proteins expressed in the brain and mediate synaptogenesis. Neuroligin family proteins can specifically induce either excitatory or inhibitory synapses. Deletions or point mutations in neuroligin genes are found in patients with autism spectrum disorders (ASD) or mental retardations. The dysfunctions of these mutations have been tested in multiple neuro…	neuroligin	Gene	0.7290802001953125
6_gut_microbiota_microbiome_gi	A hallmark in most neurological disorders is a massive neuronal cell death, in which uncontrolled immune response is usually involved, leading to neurodegeneration. The vasoactive intestinal peptide (VIP) is a pleiotropic peptide that combines neuroprotective and immunomodulatory actions. Alterations on VIP/VIP receptors in patients with neurodenegerative diseases, together with its involvement i…	vasoactive intestinal peptide	Gene	0.7288427154223124
6_gut_microbiota_microbiome_gi	A hallmark in most neurological disorders is a massive neuronal cell death, in which uncontrolled immune response is usually involved, leading to neurodegeneration. The vasoactive intestinal peptide (VIP) is a pleiotropic peptide that combines neuroprotective and immunomodulatory actions. Alterations on VIP/VIP receptors in patients with neurodenegerative diseases, together with its involvement i…	VIP	Gene	0.8819833397865295
6_gut_microbiota_microbiome_gi	A hallmark in most neurological disorders is a massive neuronal cell death, in which uncontrolled immune response is usually involved, leading to neurodegeneration. The vasoactive intestinal peptide (VIP) is a pleiotropic peptide that combines neuroprotective and immunomodulatory actions. Alterations on VIP/VIP receptors in patients with neurodenegerative diseases, together with its involvement i…	VIP	Gene	0.6249700635671616
6_gut_microbiota_microbiome_gi	A hallmark in most neurological disorders is a massive neuronal cell death, in which uncontrolled immune response is usually involved, leading to neurodegeneration. The vasoactive intestinal peptide (VIP) is a pleiotropic peptide that combines neuroprotective and immunomodulatory actions. Alterations on VIP/VIP receptors in patients with neurodenegerative diseases, together with its involvement i…	VIP-deficient	Gene	0.979355
6_gut_microbiota_microbiome_gi	A hallmark in most neurological disorders is a massive neuronal cell death, in which uncontrolled immune response is usually involved, leading to neurodegeneration. The vasoactive intestinal peptide (VIP) is a pleiotropic peptide that combines neuroprotective and immunomodulatory actions. Alterations on VIP/VIP receptors in patients with neurodenegerative diseases, together with its involvement i…	VIP	Gene	0.9232258200645447
2_synaptic_genes_mice_protein	MET receptor tyrosine kinase (MET) has been proposed as a candidate risk gene for autism spectrum disorder (ASD) based on associations between MET polymorphisms and ASD diagnosis, as well as evidence from animal studies that MET protein may regulate early development of cortical regions implicated in the neurobiology of ASD. The relevance of differences in MET signaling for human cortical develop…	MET receptor tyrosine kinase	Gene	0.8291670083999634
2_synaptic_genes_mice_protein	MET receptor tyrosine kinase (MET) has been proposed as a candidate risk gene for autism spectrum disorder (ASD) based on associations between MET polymorphisms and ASD diagnosis, as well as evidence from animal studies that MET protein may regulate early development of cortical regions implicated in the neurobiology of ASD. The relevance of differences in MET signaling for human cortical develop…	MET	Gene	0.9748830199241638
2_synaptic_genes_mice_protein	MET receptor tyrosine kinase (MET) has been proposed as a candidate risk gene for autism spectrum disorder (ASD) based on associations between MET polymorphisms and ASD diagnosis, as well as evidence from animal studies that MET protein may regulate early development of cortical regions implicated in the neurobiology of ASD. The relevance of differences in MET signaling for human cortical develop…	MET	Gene	0.98847
2_synaptic_genes_mice_protein	MET receptor tyrosine kinase (MET) has been proposed as a candidate risk gene for autism spectrum disorder (ASD) based on associations between MET polymorphisms and ASD diagnosis, as well as evidence from animal studies that MET protein may regulate early development of cortical regions implicated in the neurobiology of ASD. The relevance of differences in MET signaling for human cortical develop…	MET	Gene	0.9670734405517578
2_synaptic_genes_mice_protein	MET receptor tyrosine kinase (MET) has been proposed as a candidate risk gene for autism spectrum disorder (ASD) based on associations between MET polymorphisms and ASD diagnosis, as well as evidence from animal studies that MET protein may regulate early development of cortical regions implicated in the neurobiology of ASD. The relevance of differences in MET signaling for human cortical develop…	MET	Gene	0.9185739159584045
2_synaptic_genes_mice_protein	MET receptor tyrosine kinase (MET) has been proposed as a candidate risk gene for autism spectrum disorder (ASD) based on associations between MET polymorphisms and ASD diagnosis, as well as evidence from animal studies that MET protein may regulate early development of cortical regions implicated in the neurobiology of ASD. The relevance of differences in MET signaling for human cortical develop…	MET	Gene	0.9347368478775024
2_synaptic_genes_mice_protein	MET receptor tyrosine kinase (MET) has been proposed as a candidate risk gene for autism spectrum disorder (ASD) based on associations between MET polymorphisms and ASD diagnosis, as well as evidence from animal studies that MET protein may regulate early development of cortical regions implicated in the neurobiology of ASD. The relevance of differences in MET signaling for human cortical develop…	MET	Gene	0.8979767560958862
2_synaptic_genes_mice_protein	MET receptor tyrosine kinase (MET) has been proposed as a candidate risk gene for autism spectrum disorder (ASD) based on associations between MET polymorphisms and ASD diagnosis, as well as evidence from animal studies that MET protein may regulate early development of cortical regions implicated in the neurobiology of ASD. The relevance of differences in MET signaling for human cortical develop…	MET	Gene	0.9313833117485046
52_metabolic_metabolism_amino_metabolites	Sulfate is important for mammalian development but is not routinely measured in clinical settings. The renal NaS1 sulfate transporter maintains circulating sulfate levels and is linked to renal sulfate wasting in mice. Some autistic individuals exhibit renal sulfate wasting, but the etiology is yet unknown. We measured plasma and urinary sulfate levels, calculated the fractional excretion index (…	NaS1	Gene	0.8388027548789978
52_metabolic_metabolism_amino_metabolites	Sulfate is important for mammalian development but is not routinely measured in clinical settings. The renal NaS1 sulfate transporter maintains circulating sulfate levels and is linked to renal sulfate wasting in mice. Some autistic individuals exhibit renal sulfate wasting, but the etiology is yet unknown. We measured plasma and urinary sulfate levels, calculated the fractional excretion index (…	NaS1	Gene	0.9751927256584167
52_metabolic_metabolism_amino_metabolites	Sulfate is important for mammalian development but is not routinely measured in clinical settings. The renal NaS1 sulfate transporter maintains circulating sulfate levels and is linked to renal sulfate wasting in mice. Some autistic individuals exhibit renal sulfate wasting, but the etiology is yet unknown. We measured plasma and urinary sulfate levels, calculated the fractional excretion index (…	NaS1	Gene	0.9648991227149963
52_metabolic_metabolism_amino_metabolites	Sulfate is important for mammalian development but is not routinely measured in clinical settings. The renal NaS1 sulfate transporter maintains circulating sulfate levels and is linked to renal sulfate wasting in mice. Some autistic individuals exhibit renal sulfate wasting, but the etiology is yet unknown. We measured plasma and urinary sulfate levels, calculated the fractional excretion index (…	NaS1	Gene	0.9500098824501038
54_fxs_fragile_fmrp_fmr1	Fragile X syndrome, diagnosed by Fragile X Mental Retardation 1 (FMR1) DNA testing, is the most common single-gene cause of inherited intellectual disability. The expanded CGG mutation in the FMR1 gene, once thought to have clinical significance limited to fragile X syndrome, is now well established as the cause for other fragile X-associated disorders including fragile X-associated primary ovari…	FMR1	Gene	0.9474075436592102
54_fxs_fragile_fmrp_fmr1	Fragile X syndrome, diagnosed by Fragile X Mental Retardation 1 (FMR1) DNA testing, is the most common single-gene cause of inherited intellectual disability. The expanded CGG mutation in the FMR1 gene, once thought to have clinical significance limited to fragile X syndrome, is now well established as the cause for other fragile X-associated disorders including fragile X-associated primary ovari…	FMR1	Gene	0.9402721524238586
54_fxs_fragile_fmrp_fmr1	Fragile X syndrome, diagnosed by Fragile X Mental Retardation 1 (FMR1) DNA testing, is the most common single-gene cause of inherited intellectual disability. The expanded CGG mutation in the FMR1 gene, once thought to have clinical significance limited to fragile X syndrome, is now well established as the cause for other fragile X-associated disorders including fragile X-associated primary ovari…	FMR1	Gene	0.9816749691963196
54_fxs_fragile_fmrp_fmr1	Fragile X syndrome, diagnosed by Fragile X Mental Retardation 1 (FMR1) DNA testing, is the most common single-gene cause of inherited intellectual disability. The expanded CGG mutation in the FMR1 gene, once thought to have clinical significance limited to fragile X syndrome, is now well established as the cause for other fragile X-associated disorders including fragile X-associated primary ovari…	FMR1	Gene	0.9745379090309143
54_fxs_fragile_fmrp_fmr1	Fragile X syndrome, diagnosed by Fragile X Mental Retardation 1 (FMR1) DNA testing, is the most common single-gene cause of inherited intellectual disability. The expanded CGG mutation in the FMR1 gene, once thought to have clinical significance limited to fragile X syndrome, is now well established as the cause for other fragile X-associated disorders including fragile X-associated primary ovari…	FMR1	Gene	0.9683599472045898
54_fxs_fragile_fmrp_fmr1	Fragile X syndrome, diagnosed by Fragile X Mental Retardation 1 (FMR1) DNA testing, is the most common single-gene cause of inherited intellectual disability. The expanded CGG mutation in the FMR1 gene, once thought to have clinical significance limited to fragile X syndrome, is now well established as the cause for other fragile X-associated disorders including fragile X-associated primary ovari…	FMR1	Gene	0.9838063716888428
24_cacna1c_mutation_mutations_timothy	Populations of honey bees in North America have been experiencing high annual colony mortality for 15-20 years. Many apicultural researchers believe that introduced parasites called Varroa mites (V. destructor) are the most important factor in colony deaths. One important resistance mechanism that limits mite population growth in colonies is the ability of some lines of honey bees to groom mites …	Atlastin	Gene	0.8679774403572083
24_cacna1c_mutation_mutations_timothy	Populations of honey bees in North America have been experiencing high annual colony mortality for 15-20 years. Many apicultural researchers believe that introduced parasites called Varroa mites (V. destructor) are the most important factor in colony deaths. One important resistance mechanism that limits mite population growth in colonies is the ability of some lines of honey bees to groom mites …	Ataxin	Gene	0.9012788534164429
24_cacna1c_mutation_mutations_timothy	Populations of honey bees in North America have been experiencing high annual colony mortality for 15-20 years. Many apicultural researchers believe that introduced parasites called Varroa mites (V. destructor) are the most important factor in colony deaths. One important resistance mechanism that limits mite population growth in colonies is the ability of some lines of honey bees to groom mites …	Neurexin-1	Gene	0.9585884213447571
24_cacna1c_mutation_mutations_timothy	Populations of honey bees in North America have been experiencing high annual colony mortality for 15-20 years. Many apicultural researchers believe that introduced parasites called Varroa mites (V. destructor) are the most important factor in colony deaths. One important resistance mechanism that limits mite population growth in colonies is the ability of some lines of honey bees to groom mites …	AmNrx1	Gene	0.9831635355949402
24_cacna1c_mutation_mutations_timothy	Populations of honey bees in North America have been experiencing high annual colony mortality for 15-20 years. Many apicultural researchers believe that introduced parasites called Varroa mites (V. destructor) are the most important factor in colony deaths. One important resistance mechanism that limits mite population growth in colonies is the ability of some lines of honey bees to groom mites …	Atlastin	Gene	0.8826165199279785
24_cacna1c_mutation_mutations_timothy	Populations of honey bees in North America have been experiencing high annual colony mortality for 15-20 years. Many apicultural researchers believe that introduced parasites called Varroa mites (V. destructor) are the most important factor in colony deaths. One important resistance mechanism that limits mite population growth in colonies is the ability of some lines of honey bees to groom mites …	Ataxin	Gene	0.8626675009727478
24_cacna1c_mutation_mutations_timothy	Populations of honey bees in North America have been experiencing high annual colony mortality for 15-20 years. Many apicultural researchers believe that introduced parasites called Varroa mites (V. destructor) are the most important factor in colony deaths. One important resistance mechanism that limits mite population growth in colonies is the ability of some lines of honey bees to groom mites …	AmNrx1	Gene	0.9405081868171692
24_cacna1c_mutation_mutations_timothy	Populations of honey bees in North America have been experiencing high annual colony mortality for 15-20 years. Many apicultural researchers believe that introduced parasites called Varroa mites (V. destructor) are the most important factor in colony deaths. One important resistance mechanism that limits mite population growth in colonies is the ability of some lines of honey bees to groom mites …	Neurexin-1	Gene	0.9500101804733276
24_cacna1c_mutation_mutations_timothy	Populations of honey bees in North America have been experiencing high annual colony mortality for 15-20 years. Many apicultural researchers believe that introduced parasites called Varroa mites (V. destructor) are the most important factor in colony deaths. One important resistance mechanism that limits mite population growth in colonies is the ability of some lines of honey bees to groom mites …	Neurexin-1	Gene	0.9692089557647705
2_synaptic_genes_mice_protein	Mutations that cause intellectual disability (ID) and autism spectrum disorder (ASD) are commonly found in genes that encode for synaptic proteins. However, it remains unclear how mutations that disrupt synapse function impact intellectual ability. In the SYNGAP1 mouse model of ID/ASD, we found that dendritic spine synapses develop prematurely during the early postnatal period. Premature spine ma…	SYNGAP1	Gene	0.9769974946975708
2_synaptic_genes_mice_protein	Mutations that cause intellectual disability (ID) and autism spectrum disorder (ASD) are commonly found in genes that encode for synaptic proteins. However, it remains unclear how mutations that disrupt synapse function impact intellectual ability. In the SYNGAP1 mouse model of ID/ASD, we found that dendritic spine synapses develop prematurely during the early postnatal period. Premature spine ma…	SYNGAP1	Gene	0.9957510232925415
2_synaptic_genes_mice_protein	Mutations that cause intellectual disability (ID) and autism spectrum disorder (ASD) are commonly found in genes that encode for synaptic proteins. However, it remains unclear how mutations that disrupt synapse function impact intellectual ability. In the SYNGAP1 mouse model of ID/ASD, we found that dendritic spine synapses develop prematurely during the early postnatal period. Premature spine ma…	SynGAP	Gene	0.9734123945236206
2_synaptic_genes_mice_protein	Neurobeachin (NBEA), a brain-enriched multidomain scaffolding protein involved in neurotransmitter release and synaptic functioning, has been identified as a candidate gene for autism spectrum disorder (ASD) in four unrelated patients haploinsufficient for NBEA. The aim of this study was to map the behavioral phenotype of Nbea(+/-) mice in order to understand its contribution to the pathogenesis …	Neurobeachin	Gene	0.8570398092269897
2_synaptic_genes_mice_protein	Neurobeachin (NBEA), a brain-enriched multidomain scaffolding protein involved in neurotransmitter release and synaptic functioning, has been identified as a candidate gene for autism spectrum disorder (ASD) in four unrelated patients haploinsufficient for NBEA. The aim of this study was to map the behavioral phenotype of Nbea(+/-) mice in order to understand its contribution to the pathogenesis …	NBEA	Gene	0.9519168138504028
2_synaptic_genes_mice_protein	Neurobeachin (NBEA), a brain-enriched multidomain scaffolding protein involved in neurotransmitter release and synaptic functioning, has been identified as a candidate gene for autism spectrum disorder (ASD) in four unrelated patients haploinsufficient for NBEA. The aim of this study was to map the behavioral phenotype of Nbea(+/-) mice in order to understand its contribution to the pathogenesis …	NBEA	Gene	0.9460858106613159
2_synaptic_genes_mice_protein	Neurobeachin (NBEA), a brain-enriched multidomain scaffolding protein involved in neurotransmitter release and synaptic functioning, has been identified as a candidate gene for autism spectrum disorder (ASD) in four unrelated patients haploinsufficient for NBEA. The aim of this study was to map the behavioral phenotype of Nbea(+/-) mice in order to understand its contribution to the pathogenesis …	Nbea	Gene	0.9764911532402039
2_synaptic_genes_mice_protein	Neurobeachin (NBEA), a brain-enriched multidomain scaffolding protein involved in neurotransmitter release and synaptic functioning, has been identified as a candidate gene for autism spectrum disorder (ASD) in four unrelated patients haploinsufficient for NBEA. The aim of this study was to map the behavioral phenotype of Nbea(+/-) mice in order to understand its contribution to the pathogenesis …	Nbea	Gene	0.9751062393188477
2_synaptic_genes_mice_protein	Neurobeachin (NBEA), a brain-enriched multidomain scaffolding protein involved in neurotransmitter release and synaptic functioning, has been identified as a candidate gene for autism spectrum disorder (ASD) in four unrelated patients haploinsufficient for NBEA. The aim of this study was to map the behavioral phenotype of Nbea(+/-) mice in order to understand its contribution to the pathogenesis …	BDNF	Gene	0.9673328399658203
2_synaptic_genes_mice_protein	Neurobeachin (NBEA), a brain-enriched multidomain scaffolding protein involved in neurotransmitter release and synaptic functioning, has been identified as a candidate gene for autism spectrum disorder (ASD) in four unrelated patients haploinsufficient for NBEA. The aim of this study was to map the behavioral phenotype of Nbea(+/-) mice in order to understand its contribution to the pathogenesis …	cAMP response element-binding protein	Gene	0.6394026875495911
2_synaptic_genes_mice_protein	Neurobeachin (NBEA), a brain-enriched multidomain scaffolding protein involved in neurotransmitter release and synaptic functioning, has been identified as a candidate gene for autism spectrum disorder (ASD) in four unrelated patients haploinsufficient for NBEA. The aim of this study was to map the behavioral phenotype of Nbea(+/-) mice in order to understand its contribution to the pathogenesis …	CREB	Gene	0.8924641609191895
2_synaptic_genes_mice_protein	Neurobeachin (NBEA), a brain-enriched multidomain scaffolding protein involved in neurotransmitter release and synaptic functioning, has been identified as a candidate gene for autism spectrum disorder (ASD) in four unrelated patients haploinsufficient for NBEA. The aim of this study was to map the behavioral phenotype of Nbea(+/-) mice in order to understand its contribution to the pathogenesis …	Nbea	Gene	0.971862
2_synaptic_genes_mice_protein	Neurobeachin (NBEA), a brain-enriched multidomain scaffolding protein involved in neurotransmitter release and synaptic functioning, has been identified as a candidate gene for autism spectrum disorder (ASD) in four unrelated patients haploinsufficient for NBEA. The aim of this study was to map the behavioral phenotype of Nbea(+/-) mice in order to understand its contribution to the pathogenesis …	zif268	Gene	0.6933140754699707
2_synaptic_genes_mice_protein	Neurobeachin (NBEA), a brain-enriched multidomain scaffolding protein involved in neurotransmitter release and synaptic functioning, has been identified as a candidate gene for autism spectrum disorder (ASD) in four unrelated patients haploinsufficient for NBEA. The aim of this study was to map the behavioral phenotype of Nbea(+/-) mice in order to understand its contribution to the pathogenesis …	CREB	Gene	0.7397322654724121
2_synaptic_genes_mice_protein	Neurobeachin (NBEA), a brain-enriched multidomain scaffolding protein involved in neurotransmitter release and synaptic functioning, has been identified as a candidate gene for autism spectrum disorder (ASD) in four unrelated patients haploinsufficient for NBEA. The aim of this study was to map the behavioral phenotype of Nbea(+/-) mice in order to understand its contribution to the pathogenesis …	BDNF	Gene	0.9706096053123474
2_synaptic_genes_mice_protein	Neurobeachin (NBEA), a brain-enriched multidomain scaffolding protein involved in neurotransmitter release and synaptic functioning, has been identified as a candidate gene for autism spectrum disorder (ASD) in four unrelated patients haploinsufficient for NBEA. The aim of this study was to map the behavioral phenotype of Nbea(+/-) mice in order to understand its contribution to the pathogenesis …	Nbea	Gene	0.9800293445587158
2_synaptic_genes_mice_protein	Neurobeachin (NBEA), a brain-enriched multidomain scaffolding protein involved in neurotransmitter release and synaptic functioning, has been identified as a candidate gene for autism spectrum disorder (ASD) in four unrelated patients haploinsufficient for NBEA. The aim of this study was to map the behavioral phenotype of Nbea(+/-) mice in order to understand its contribution to the pathogenesis …	NBEA	Gene	0.7389789819717407
31_genetic_psychiatric_schizophrenia_polygenic	Analysis of genetic linkage to dyslexia was performed using 133,165 array-based SNPs genotyped in 718 persons from 101 dyslexia-affected families. Results showed five linkage peaks with lod scores >2.3 (4q13.1, 7q36.1-q36.2, 7q36.3, 16p12.1, and 17q22). Of these five regions, three have been previously implicated in dyslexia (4q13.1, 16p12.1, and 17q22), three have been implicated in attention-de…	MSI2	Gene	0.9555948376655579
31_genetic_psychiatric_schizophrenia_polygenic	Analysis of genetic linkage to dyslexia was performed using 133,165 array-based SNPs genotyped in 718 persons from 101 dyslexia-affected families. Results showed five linkage peaks with lod scores >2.3 (4q13.1, 7q36.1-q36.2, 7q36.3, 16p12.1, and 17q22). Of these five regions, three have been previously implicated in dyslexia (4q13.1, 16p12.1, and 17q22), three have been implicated in attention-de…	LPHN3	Gene	0.9924088716506958
31_genetic_psychiatric_schizophrenia_polygenic	Analysis of genetic linkage to dyslexia was performed using 133,165 array-based SNPs genotyped in 718 persons from 101 dyslexia-affected families. Results showed five linkage peaks with lod scores >2.3 (4q13.1, 7q36.1-q36.2, 7q36.3, 16p12.1, and 17q22). Of these five regions, three have been previously implicated in dyslexia (4q13.1, 16p12.1, and 17q22), three have been implicated in attention-de…	FGF18	Gene	0.9954779744148254
54_fxs_fragile_fmrp_fmr1	Fragile X syndrome (FXS) is the most frequent form of inherited intellectual disability and is also linked to other neurologic and psychiatric disorders. FXS is caused by a triplet expansion that inhibits expression of the FMR1 gene; the gene product, FMRP, regulates mRNA metabolism in the brain and thus controls the expression of key molecules involved in receptor signaling and spine morphology.…	FMR1	Gene	0.9043685793876648
54_fxs_fragile_fmrp_fmr1	Fragile X syndrome (FXS) is the most frequent form of inherited intellectual disability and is also linked to other neurologic and psychiatric disorders. FXS is caused by a triplet expansion that inhibits expression of the FMR1 gene; the gene product, FMRP, regulates mRNA metabolism in the brain and thus controls the expression of key molecules involved in receptor signaling and spine morphology.…	FMRP	Gene	0.8489635586738586
54_fxs_fragile_fmrp_fmr1	Fragile X syndrome (FXS) is the most frequent form of inherited intellectual disability and is also linked to other neurologic and psychiatric disorders. FXS is caused by a triplet expansion that inhibits expression of the FMR1 gene; the gene product, FMRP, regulates mRNA metabolism in the brain and thus controls the expression of key molecules involved in receptor signaling and spine morphology.…	FMRP	Gene	0.7297608852386475
57_snps_association_genetic_polymorphisms	Autism (MIM209850) is a neurodevelopmental disorder characterized by a triad of impairments, namely impairment in social interaction, impaired communication skills, and restrictive and repetitive behavior. A number of family and twin studies have demonstrated that genetic factors play a pivotal role in the etiology of autistic disorder. Various reports of reduced levels of reelin protein in the b…	reelin	Gene	0.9804995656013489
57_snps_association_genetic_polymorphisms	Autism (MIM209850) is a neurodevelopmental disorder characterized by a triad of impairments, namely impairment in social interaction, impaired communication skills, and restrictive and repetitive behavior. A number of family and twin studies have demonstrated that genetic factors play a pivotal role in the etiology of autistic disorder. Various reports of reduced levels of reelin protein in the b…	reelin	Gene	0.9534436464309692
57_snps_association_genetic_polymorphisms	Autism (MIM209850) is a neurodevelopmental disorder characterized by a triad of impairments, namely impairment in social interaction, impaired communication skills, and restrictive and repetitive behavior. A number of family and twin studies have demonstrated that genetic factors play a pivotal role in the etiology of autistic disorder. Various reports of reduced levels of reelin protein in the b…	RELN	Gene	0.9900262355804443
57_snps_association_genetic_polymorphisms	Autism (MIM209850) is a neurodevelopmental disorder characterized by a triad of impairments, namely impairment in social interaction, impaired communication skills, and restrictive and repetitive behavior. A number of family and twin studies have demonstrated that genetic factors play a pivotal role in the etiology of autistic disorder. Various reports of reduced levels of reelin protein in the b…	RELN	Gene	0.9941290616989136
57_snps_association_genetic_polymorphisms	Autism (MIM209850) is a neurodevelopmental disorder characterized by a triad of impairments, namely impairment in social interaction, impaired communication skills, and restrictive and repetitive behavior. A number of family and twin studies have demonstrated that genetic factors play a pivotal role in the etiology of autistic disorder. Various reports of reduced levels of reelin protein in the b…	RELN	Gene	0.9959827661514282
57_snps_association_genetic_polymorphisms	Autism (MIM209850) is a neurodevelopmental disorder characterized by a triad of impairments, namely impairment in social interaction, impaired communication skills, and restrictive and repetitive behavior. A number of family and twin studies have demonstrated that genetic factors play a pivotal role in the etiology of autistic disorder. Various reports of reduced levels of reelin protein in the b…	RELN	Gene	0.9889034628868103
16_deletion_duplication_16p11_22q11	The 22q13.3 deletion causes a neurodevelopmental syndrome, also known as Phelan-McDermid syndrome (MIM #606232), characterized by developmental delay and severe delay or absence of expressive speech. Two patients with hemizygous chromosome 22q13.3 telomeric deletion were referred to us when brain-imaging studies revealed cerebellar vermis hypoplasia (CBVH). To determine whether developmental abno…	SHANK3	Gene	0.9951068162918091
16_deletion_duplication_16p11_22q11	The 22q13.3 deletion causes a neurodevelopmental syndrome, also known as Phelan-McDermid syndrome (MIM #606232), characterized by developmental delay and severe delay or absence of expressive speech. Two patients with hemizygous chromosome 22q13.3 telomeric deletion were referred to us when brain-imaging studies revealed cerebellar vermis hypoplasia (CBVH). To determine whether developmental abno…	SHANK3	Gene	0.996162
16_deletion_duplication_16p11_22q11	The 22q13.3 deletion causes a neurodevelopmental syndrome, also known as Phelan-McDermid syndrome (MIM #606232), characterized by developmental delay and severe delay or absence of expressive speech. Two patients with hemizygous chromosome 22q13.3 telomeric deletion were referred to us when brain-imaging studies revealed cerebellar vermis hypoplasia (CBVH). To determine whether developmental abno…	SHANK3	Gene	0.993881
16_deletion_duplication_16p11_22q11	The 22q13.3 deletion causes a neurodevelopmental syndrome, also known as Phelan-McDermid syndrome (MIM #606232), characterized by developmental delay and severe delay or absence of expressive speech. Two patients with hemizygous chromosome 22q13.3 telomeric deletion were referred to us when brain-imaging studies revealed cerebellar vermis hypoplasia (CBVH). To determine whether developmental abno…	PLXNB2	Gene	0.9919834733009338
16_deletion_duplication_16p11_22q11	The 22q13.3 deletion causes a neurodevelopmental syndrome, also known as Phelan-McDermid syndrome (MIM #606232), characterized by developmental delay and severe delay or absence of expressive speech. Two patients with hemizygous chromosome 22q13.3 telomeric deletion were referred to us when brain-imaging studies revealed cerebellar vermis hypoplasia (CBVH). To determine whether developmental abno…	MAPK8IP2	Gene	0.9826714396476746
16_deletion_duplication_16p11_22q11	Microdeletions of 8q21.3-8q22.1 have been identified in all patients with Nablus mask-like facial syndrome (NMLFS). A recent report of a patient without this specific phenotype presented a 1.6â€‰Mb deletion in this region that partially overlapped with previously reported 8q21.3 microdeletions, thus restricting critical region for this syndrome. We report on another case of an 8q21.3 deletion rev…	FAM92A1	Gene	0.9845526218414307
16_deletion_duplication_16p11_22q11	Deletions on the distal portion of the long arm of chromosome 1 result in complex and highly variable clinical phenotypes which include intellectual disability, autism, seizures, microcephaly/craniofacial dysmorphology, corpus callosal agenesis/hypogenesis, cardiac and genital anomalies, hand and foot abnormalities and short stature. Genotype-phenotype correlation reported a minimum region of 2 M…	CHRM3	Gene	0.9804738759994507
16_deletion_duplication_16p11_22q11	Deletions on the distal portion of the long arm of chromosome 1 result in complex and highly variable clinical phenotypes which include intellectual disability, autism, seizures, microcephaly/craniofacial dysmorphology, corpus callosal agenesis/hypogenesis, cardiac and genital anomalies, hand and foot abnormalities and short stature. Genotype-phenotype correlation reported a minimum region of 2 M…	Acetylcholine Receptor	Gene	0.8033318221569061
16_deletion_duplication_16p11_22q11	Deletions on the distal portion of the long arm of chromosome 1 result in complex and highly variable clinical phenotypes which include intellectual disability, autism, seizures, microcephaly/craniofacial dysmorphology, corpus callosal agenesis/hypogenesis, cardiac and genital anomalies, hand and foot abnormalities and short stature. Genotype-phenotype correlation reported a minimum region of 2 M…	Muscarinic	Gene	0.5970436930656433
16_deletion_duplication_16p11_22q11	Deletions on the distal portion of the long arm of chromosome 1 result in complex and highly variable clinical phenotypes which include intellectual disability, autism, seizures, microcephaly/craniofacial dysmorphology, corpus callosal agenesis/hypogenesis, cardiac and genital anomalies, hand and foot abnormalities and short stature. Genotype-phenotype correlation reported a minimum region of 2 M…	CHRM3	Gene	0.9910507202148438
16_deletion_duplication_16p11_22q11	Deletions on the distal portion of the long arm of chromosome 1 result in complex and highly variable clinical phenotypes which include intellectual disability, autism, seizures, microcephaly/craniofacial dysmorphology, corpus callosal agenesis/hypogenesis, cardiac and genital anomalies, hand and foot abnormalities and short stature. Genotype-phenotype correlation reported a minimum region of 2 M…	M3 muscarinic receptor	Gene	0.6910480856895447
16_deletion_duplication_16p11_22q11	Deletions on the distal portion of the long arm of chromosome 1 result in complex and highly variable clinical phenotypes which include intellectual disability, autism, seizures, microcephaly/craniofacial dysmorphology, corpus callosal agenesis/hypogenesis, cardiac and genital anomalies, hand and foot abnormalities and short stature. Genotype-phenotype correlation reported a minimum region of 2 M…	CHRM3	Gene	0.9905475974082947
69_cnvs_cnv_copy_genomic	Autism spectrum disorders (ASDs) are a heterogeneous group of neurodevelopment disorders with a complex genetic aetiology. The aim of this study was to identify copy number variations (CNVs) with a clinical significance for ASD.Array-based comparative genomic hybridization was applied to detect CNVs in a clinically well-characterized population of 50 children and adolescents with ASD.Nine CNVs wi…	ASD-associated	Gene	0.6946004629135132
57_snps_association_genetic_polymorphisms	Single nucleotide polymorphisms (SNPs) in the Reelin gene (RELN) are likely candidates to confer risk for autism. The objective of the present study is to investigate the association of RELN gene SNPs with autism.A total of 367 Chinese Han subjects were recruited, including 186 autism patients and 181 unrelated healthy controls. Polymerase chain reaction-restriction fragment length polymorphism (…	Reelin	Gene	0.9590871930122375
57_snps_association_genetic_polymorphisms	Single nucleotide polymorphisms (SNPs) in the Reelin gene (RELN) are likely candidates to confer risk for autism. The objective of the present study is to investigate the association of RELN gene SNPs with autism.A total of 367 Chinese Han subjects were recruited, including 186 autism patients and 181 unrelated healthy controls. Polymerase chain reaction-restriction fragment length polymorphism (…	RELN	Gene	0.9944502115249634
57_snps_association_genetic_polymorphisms	Single nucleotide polymorphisms (SNPs) in the Reelin gene (RELN) are likely candidates to confer risk for autism. The objective of the present study is to investigate the association of RELN gene SNPs with autism.A total of 367 Chinese Han subjects were recruited, including 186 autism patients and 181 unrelated healthy controls. Polymerase chain reaction-restriction fragment length polymorphism (…	RELN	Gene	0.9985367059707642
57_snps_association_genetic_polymorphisms	Single nucleotide polymorphisms (SNPs) in the Reelin gene (RELN) are likely candidates to confer risk for autism. The objective of the present study is to investigate the association of RELN gene SNPs with autism.A total of 367 Chinese Han subjects were recruited, including 186 autism patients and 181 unrelated healthy controls. Polymerase chain reaction-restriction fragment length polymorphism (…	RELN	Gene	0.9959964752197266
57_snps_association_genetic_polymorphisms	Single nucleotide polymorphisms (SNPs) in the Reelin gene (RELN) are likely candidates to confer risk for autism. The objective of the present study is to investigate the association of RELN gene SNPs with autism.A total of 367 Chinese Han subjects were recruited, including 186 autism patients and 181 unrelated healthy controls. Polymerase chain reaction-restriction fragment length polymorphism (…	RELN	Gene	0.9938344955444336
57_snps_association_genetic_polymorphisms	Single nucleotide polymorphisms (SNPs) in the Reelin gene (RELN) are likely candidates to confer risk for autism. The objective of the present study is to investigate the association of RELN gene SNPs with autism.A total of 367 Chinese Han subjects were recruited, including 186 autism patients and 181 unrelated healthy controls. Polymerase chain reaction-restriction fragment length polymorphism (…	RELN	Gene	0.9930998086929321
54_fxs_fragile_fmrp_fmr1	Fragile X testing is a priority in the evaluation of autism spectrum disorders (ASD) cases because identification of the FMR1 mutation leads to new treatment options. This study is focused on determining the prevalence of the FMR1 gene mutation among ASD cases in Indonesia. DSM-IV-TR criteria were administered to diagnose ASD; symptom severity was classified using the Childhood Autism Rating Scal…	FMR1	Gene	0.9491041898727417
54_fxs_fragile_fmrp_fmr1	Fragile X testing is a priority in the evaluation of autism spectrum disorders (ASD) cases because identification of the FMR1 mutation leads to new treatment options. This study is focused on determining the prevalence of the FMR1 gene mutation among ASD cases in Indonesia. DSM-IV-TR criteria were administered to diagnose ASD; symptom severity was classified using the Childhood Autism Rating Scal…	FMR1	Gene	0.9738619327545166
54_fxs_fragile_fmrp_fmr1	Fragile X testing is a priority in the evaluation of autism spectrum disorders (ASD) cases because identification of the FMR1 mutation leads to new treatment options. This study is focused on determining the prevalence of the FMR1 gene mutation among ASD cases in Indonesia. DSM-IV-TR criteria were administered to diagnose ASD; symptom severity was classified using the Childhood Autism Rating Scal…	FMR1	Gene	0.9915339350700378
54_fxs_fragile_fmrp_fmr1	Fragile X testing is a priority in the evaluation of autism spectrum disorders (ASD) cases because identification of the FMR1 mutation leads to new treatment options. This study is focused on determining the prevalence of the FMR1 gene mutation among ASD cases in Indonesia. DSM-IV-TR criteria were administered to diagnose ASD; symptom severity was classified using the Childhood Autism Rating Scal…	FMR1	Gene	0.9795439839363098
57_snps_association_genetic_polymorphisms	Autism is a pervasive neurodevelopmental disorder diagnosed in early childhood. The genetic factors might play an important role in its pathogenesis. Previous studies revealed that Reelin (RELN) polymorphisms were associated with autism. However, the roles of genes in Reelin signaling pathway for autism are largely unknown. As several knockout mice models in which the Reelin pathway genes (i.e. D…	Reelin	Gene	0.9747800230979919
57_snps_association_genetic_polymorphisms	Autism is a pervasive neurodevelopmental disorder diagnosed in early childhood. The genetic factors might play an important role in its pathogenesis. Previous studies revealed that Reelin (RELN) polymorphisms were associated with autism. However, the roles of genes in Reelin signaling pathway for autism are largely unknown. As several knockout mice models in which the Reelin pathway genes (i.e. D…	RELN	Gene	0.9941577911376953
57_snps_association_genetic_polymorphisms	Autism is a pervasive neurodevelopmental disorder diagnosed in early childhood. The genetic factors might play an important role in its pathogenesis. Previous studies revealed that Reelin (RELN) polymorphisms were associated with autism. However, the roles of genes in Reelin signaling pathway for autism are largely unknown. As several knockout mice models in which the Reelin pathway genes (i.e. D…	Reelin	Gene	0.9298926591873169
57_snps_association_genetic_polymorphisms	Autism is a pervasive neurodevelopmental disorder diagnosed in early childhood. The genetic factors might play an important role in its pathogenesis. Previous studies revealed that Reelin (RELN) polymorphisms were associated with autism. However, the roles of genes in Reelin signaling pathway for autism are largely unknown. As several knockout mice models in which the Reelin pathway genes (i.e. D…	Reelin	Gene	0.9540848731994629
57_snps_association_genetic_polymorphisms	Autism is a pervasive neurodevelopmental disorder diagnosed in early childhood. The genetic factors might play an important role in its pathogenesis. Previous studies revealed that Reelin (RELN) polymorphisms were associated with autism. However, the roles of genes in Reelin signaling pathway for autism are largely unknown. As several knockout mice models in which the Reelin pathway genes (i.e. D…	DAB1	Gene	0.9682921171188354
57_snps_association_genetic_polymorphisms	Autism is a pervasive neurodevelopmental disorder diagnosed in early childhood. The genetic factors might play an important role in its pathogenesis. Previous studies revealed that Reelin (RELN) polymorphisms were associated with autism. However, the roles of genes in Reelin signaling pathway for autism are largely unknown. As several knockout mice models in which the Reelin pathway genes (i.e. D…	VLDLR	Gene	0.9856860041618347
57_snps_association_genetic_polymorphisms	Autism is a pervasive neurodevelopmental disorder diagnosed in early childhood. The genetic factors might play an important role in its pathogenesis. Previous studies revealed that Reelin (RELN) polymorphisms were associated with autism. However, the roles of genes in Reelin signaling pathway for autism are largely unknown. As several knockout mice models in which the Reelin pathway genes (i.e. D…	APOER2	Gene	0.996131
57_snps_association_genetic_polymorphisms	Autism is a pervasive neurodevelopmental disorder diagnosed in early childhood. The genetic factors might play an important role in its pathogenesis. Previous studies revealed that Reelin (RELN) polymorphisms were associated with autism. However, the roles of genes in Reelin signaling pathway for autism are largely unknown. As several knockout mice models in which the Reelin pathway genes (i.e. D…	FYN	Gene	0.9648623466491699
57_snps_association_genetic_polymorphisms	Autism is a pervasive neurodevelopmental disorder diagnosed in early childhood. The genetic factors might play an important role in its pathogenesis. Previous studies revealed that Reelin (RELN) polymorphisms were associated with autism. However, the roles of genes in Reelin signaling pathway for autism are largely unknown. As several knockout mice models in which the Reelin pathway genes (i.e. D…	SRC	Gene	0.9318434000015259
57_snps_association_genetic_polymorphisms	Autism is a pervasive neurodevelopmental disorder diagnosed in early childhood. The genetic factors might play an important role in its pathogenesis. Previous studies revealed that Reelin (RELN) polymorphisms were associated with autism. However, the roles of genes in Reelin signaling pathway for autism are largely unknown. As several knockout mice models in which the Reelin pathway genes (i.e. D…	CRK	Gene	0.9528846740722656
57_snps_association_genetic_polymorphisms	Autism is a pervasive neurodevelopmental disorder diagnosed in early childhood. The genetic factors might play an important role in its pathogenesis. Previous studies revealed that Reelin (RELN) polymorphisms were associated with autism. However, the roles of genes in Reelin signaling pathway for autism are largely unknown. As several knockout mice models in which the Reelin pathway genes (i.e. D…	CRKL	Gene	0.9501495361328125
57_snps_association_genetic_polymorphisms	Autism is a pervasive neurodevelopmental disorder diagnosed in early childhood. The genetic factors might play an important role in its pathogenesis. Previous studies revealed that Reelin (RELN) polymorphisms were associated with autism. However, the roles of genes in Reelin signaling pathway for autism are largely unknown. As several knockout mice models in which the Reelin pathway genes (i.e. D…	Reelin	Gene	0.9850871562957764
57_snps_association_genetic_polymorphisms	Autism is a pervasive neurodevelopmental disorder diagnosed in early childhood. The genetic factors might play an important role in its pathogenesis. Previous studies revealed that Reelin (RELN) polymorphisms were associated with autism. However, the roles of genes in Reelin signaling pathway for autism are largely unknown. As several knockout mice models in which the Reelin pathway genes (i.e. D…	Reelin	Gene	0.9418959021568298
57_snps_association_genetic_polymorphisms	Autism is a pervasive neurodevelopmental disorder diagnosed in early childhood. The genetic factors might play an important role in its pathogenesis. Previous studies revealed that Reelin (RELN) polymorphisms were associated with autism. However, the roles of genes in Reelin signaling pathway for autism are largely unknown. As several knockout mice models in which the Reelin pathway genes (i.e. D…	Reelin	Gene	0.9831052422523499
57_snps_association_genetic_polymorphisms	Autism is a pervasive neurodevelopmental disorder diagnosed in early childhood. The genetic factors might play an important role in its pathogenesis. Previous studies revealed that Reelin (RELN) polymorphisms were associated with autism. However, the roles of genes in Reelin signaling pathway for autism are largely unknown. As several knockout mice models in which the Reelin pathway genes (i.e. D…	DAB1	Gene	0.9625823497772217
57_snps_association_genetic_polymorphisms	Autism is a pervasive neurodevelopmental disorder diagnosed in early childhood. The genetic factors might play an important role in its pathogenesis. Previous studies revealed that Reelin (RELN) polymorphisms were associated with autism. However, the roles of genes in Reelin signaling pathway for autism are largely unknown. As several knockout mice models in which the Reelin pathway genes (i.e. D…	DAB1	Gene	0.9348559379577637
57_snps_association_genetic_polymorphisms	Autism is a pervasive neurodevelopmental disorder diagnosed in early childhood. The genetic factors might play an important role in its pathogenesis. Previous studies revealed that Reelin (RELN) polymorphisms were associated with autism. However, the roles of genes in Reelin signaling pathway for autism are largely unknown. As several knockout mice models in which the Reelin pathway genes (i.e. D…	DAB1	Gene	0.9679177403450012
57_snps_association_genetic_polymorphisms	Autism is a pervasive neurodevelopmental disorder diagnosed in early childhood. The genetic factors might play an important role in its pathogenesis. Previous studies revealed that Reelin (RELN) polymorphisms were associated with autism. However, the roles of genes in Reelin signaling pathway for autism are largely unknown. As several knockout mice models in which the Reelin pathway genes (i.e. D…	Reelin	Gene	0.9319273233413696
57_snps_association_genetic_polymorphisms	Autism is a pervasive neurodevelopmental disorder diagnosed in early childhood. The genetic factors might play an important role in its pathogenesis. Previous studies revealed that Reelin (RELN) polymorphisms were associated with autism. However, the roles of genes in Reelin signaling pathway for autism are largely unknown. As several knockout mice models in which the Reelin pathway genes (i.e. D…	Reelin	Gene	0.9306356310844421
69_cnvs_cnv_copy_genomic	The contribution of copy-number variation (CNV) to disease has been highlighted with the widespread adoption of array-based comparative genomic hybridisation (aCGH) and microarray technology. Contiguous gene deletions involving ANKRD11 in 16q24.3 are associated with autism spectrum disorder (ASD) and intellectual disability (ID), while 16q24.1 deletions affecting FOXF1 are associated with congeni…	ANKRD11	Gene	0.9832289814949036
69_cnvs_cnv_copy_genomic	The contribution of copy-number variation (CNV) to disease has been highlighted with the widespread adoption of array-based comparative genomic hybridisation (aCGH) and microarray technology. Contiguous gene deletions involving ANKRD11 in 16q24.3 are associated with autism spectrum disorder (ASD) and intellectual disability (ID), while 16q24.1 deletions affecting FOXF1 are associated with congeni…	FOXF1	Gene	0.9892076849937439
69_cnvs_cnv_copy_genomic	The contribution of copy-number variation (CNV) to disease has been highlighted with the widespread adoption of array-based comparative genomic hybridisation (aCGH) and microarray technology. Contiguous gene deletions involving ANKRD11 in 16q24.3 are associated with autism spectrum disorder (ASD) and intellectual disability (ID), while 16q24.1 deletions affecting FOXF1 are associated with congeni…	FOXF1	Gene	0.9940040707588196
69_cnvs_cnv_copy_genomic	The contribution of copy-number variation (CNV) to disease has been highlighted with the widespread adoption of array-based comparative genomic hybridisation (aCGH) and microarray technology. Contiguous gene deletions involving ANKRD11 in 16q24.3 are associated with autism spectrum disorder (ASD) and intellectual disability (ID), while 16q24.1 deletions affecting FOXF1 are associated with congeni…	ANKRD11	Gene	0.9908106327056885
69_cnvs_cnv_copy_genomic	The contribution of copy-number variation (CNV) to disease has been highlighted with the widespread adoption of array-based comparative genomic hybridisation (aCGH) and microarray technology. Contiguous gene deletions involving ANKRD11 in 16q24.3 are associated with autism spectrum disorder (ASD) and intellectual disability (ID), while 16q24.1 deletions affecting FOXF1 are associated with congeni…	FBXO31	Gene	0.9793058037757874
69_cnvs_cnv_copy_genomic	The contribution of copy-number variation (CNV) to disease has been highlighted with the widespread adoption of array-based comparative genomic hybridisation (aCGH) and microarray technology. Contiguous gene deletions involving ANKRD11 in 16q24.3 are associated with autism spectrum disorder (ASD) and intellectual disability (ID), while 16q24.1 deletions affecting FOXF1 are associated with congeni…	MAP1LC3B	Gene	0.9638817310333252
69_cnvs_cnv_copy_genomic	The contribution of copy-number variation (CNV) to disease has been highlighted with the widespread adoption of array-based comparative genomic hybridisation (aCGH) and microarray technology. Contiguous gene deletions involving ANKRD11 in 16q24.3 are associated with autism spectrum disorder (ASD) and intellectual disability (ID), while 16q24.1 deletions affecting FOXF1 are associated with congeni…	C16orf95	Gene	0.7861854434013367
69_cnvs_cnv_copy_genomic	The contribution of copy-number variation (CNV) to disease has been highlighted with the widespread adoption of array-based comparative genomic hybridisation (aCGH) and microarray technology. Contiguous gene deletions involving ANKRD11 in 16q24.3 are associated with autism spectrum disorder (ASD) and intellectual disability (ID), while 16q24.1 deletions affecting FOXF1 are associated with congeni…	ZCCHC14	Gene	0.798521
69_cnvs_cnv_copy_genomic	The contribution of copy-number variation (CNV) to disease has been highlighted with the widespread adoption of array-based comparative genomic hybridisation (aCGH) and microarray technology. Contiguous gene deletions involving ANKRD11 in 16q24.3 are associated with autism spectrum disorder (ASD) and intellectual disability (ID), while 16q24.1 deletions affecting FOXF1 are associated with congeni…	C16orf95	Gene	0.9255093932151794
69_cnvs_cnv_copy_genomic	The contribution of copy-number variation (CNV) to disease has been highlighted with the widespread adoption of array-based comparative genomic hybridisation (aCGH) and microarray technology. Contiguous gene deletions involving ANKRD11 in 16q24.3 are associated with autism spectrum disorder (ASD) and intellectual disability (ID), while 16q24.1 deletions affecting FOXF1 are associated with congeni…	ZCCHC14	Gene	0.9002689719200134
69_cnvs_cnv_copy_genomic	The contribution of copy-number variation (CNV) to disease has been highlighted with the widespread adoption of array-based comparative genomic hybridisation (aCGH) and microarray technology. Contiguous gene deletions involving ANKRD11 in 16q24.3 are associated with autism spectrum disorder (ASD) and intellectual disability (ID), while 16q24.1 deletions affecting FOXF1 are associated with congeni…	MAP1LC3B	Gene	0.9516119956970215
69_cnvs_cnv_copy_genomic	The contribution of copy-number variation (CNV) to disease has been highlighted with the widespread adoption of array-based comparative genomic hybridisation (aCGH) and microarray technology. Contiguous gene deletions involving ANKRD11 in 16q24.3 are associated with autism spectrum disorder (ASD) and intellectual disability (ID), while 16q24.1 deletions affecting FOXF1 are associated with congeni…	FBXO31	Gene	0.9805458784103394
15_genes_variants_mutations_novo	Despite significant heritability of autism spectrum disorders (ASDs), their extreme genetic heterogeneity has proven challenging for gene discovery. Studies of primarily simplex families have implicated de novo copy number changes and point mutations, but are not optimally designed to identify inherited risk alleles. We apply whole-exome sequencing (WES) to ASD families enriched for inherited cau…	AMT	Gene	0.928138
15_genes_variants_mutations_novo	Despite significant heritability of autism spectrum disorders (ASDs), their extreme genetic heterogeneity has proven challenging for gene discovery. Studies of primarily simplex families have implicated de novo copy number changes and point mutations, but are not optimally designed to identify inherited risk alleles. We apply whole-exome sequencing (WES) to ASD families enriched for inherited cau…	PEX7	Gene	0.9867532849311829
15_genes_variants_mutations_novo	Despite significant heritability of autism spectrum disorders (ASDs), their extreme genetic heterogeneity has proven challenging for gene discovery. Studies of primarily simplex families have implicated de novo copy number changes and point mutations, but are not optimally designed to identify inherited risk alleles. We apply whole-exome sequencing (WES) to ASD families enriched for inherited cau…	SYNE1	Gene	0.9981961846351624
15_genes_variants_mutations_novo	Despite significant heritability of autism spectrum disorders (ASDs), their extreme genetic heterogeneity has proven challenging for gene discovery. Studies of primarily simplex families have implicated de novo copy number changes and point mutations, but are not optimally designed to identify inherited risk alleles. We apply whole-exome sequencing (WES) to ASD families enriched for inherited cau…	VPS13B	Gene	0.9948380589485168
15_genes_variants_mutations_novo	Despite significant heritability of autism spectrum disorders (ASDs), their extreme genetic heterogeneity has proven challenging for gene discovery. Studies of primarily simplex families have implicated de novo copy number changes and point mutations, but are not optimally designed to identify inherited risk alleles. We apply whole-exome sequencing (WES) to ASD families enriched for inherited cau…	PAH	Gene	0.9134670495986938
15_genes_variants_mutations_novo	Despite significant heritability of autism spectrum disorders (ASDs), their extreme genetic heterogeneity has proven challenging for gene discovery. Studies of primarily simplex families have implicated de novo copy number changes and point mutations, but are not optimally designed to identify inherited risk alleles. We apply whole-exome sequencing (WES) to ASD families enriched for inherited cau…	POMGNT1	Gene	0.9945738911628723
16_deletion_duplication_16p11_22q11	22q11.2 deletion syndrome (22q11DS) is a genetic disorder that conveys a significant risk for the development of social behavior disorders, including autism and schizophrenia. Also known as DiGeorge syndrome, 22q11DS is the second most common genetic disorder and is characterized by an elevated risk for immune dysfunction, up to 77% of individuals have an identifiable immune deficiency. We hypoth…	cytokines	Gene	0.7788121700286865
16_deletion_duplication_16p11_22q11	22q11.2 deletion syndrome (22q11DS) is a genetic disorder that conveys a significant risk for the development of social behavior disorders, including autism and schizophrenia. Also known as DiGeorge syndrome, 22q11DS is the second most common genetic disorder and is characterized by an elevated risk for immune dysfunction, up to 77% of individuals have an identifiable immune deficiency. We hypoth…	cytokine	Gene	0.659045
16_deletion_duplication_16p11_22q11	22q11.2 deletion syndrome (22q11DS) is a genetic disorder that conveys a significant risk for the development of social behavior disorders, including autism and schizophrenia. Also known as DiGeorge syndrome, 22q11DS is the second most common genetic disorder and is characterized by an elevated risk for immune dysfunction, up to 77% of individuals have an identifiable immune deficiency. We hypoth…	IL-1Î²	Gene	0.9246577620506287
16_deletion_duplication_16p11_22q11	22q11.2 deletion syndrome (22q11DS) is a genetic disorder that conveys a significant risk for the development of social behavior disorders, including autism and schizophrenia. Also known as DiGeorge syndrome, 22q11DS is the second most common genetic disorder and is characterized by an elevated risk for immune dysfunction, up to 77% of individuals have an identifiable immune deficiency. We hypoth…	cytokine	Gene	0.6862413883209229
16_deletion_duplication_16p11_22q11	22q11.2 deletion syndrome (22q11DS) is a genetic disorder that conveys a significant risk for the development of social behavior disorders, including autism and schizophrenia. Also known as DiGeorge syndrome, 22q11DS is the second most common genetic disorder and is characterized by an elevated risk for immune dysfunction, up to 77% of individuals have an identifiable immune deficiency. We hypoth…	IL-6	Gene	0.9427599310874939
16_deletion_duplication_16p11_22q11	22q11.2 deletion syndrome (22q11DS) is a genetic disorder that conveys a significant risk for the development of social behavior disorders, including autism and schizophrenia. Also known as DiGeorge syndrome, 22q11DS is the second most common genetic disorder and is characterized by an elevated risk for immune dysfunction, up to 77% of individuals have an identifiable immune deficiency. We hypoth…	cytokine	Gene	0.6829284429550171
16_deletion_duplication_16p11_22q11	22q11.2 deletion syndrome (22q11DS) is a genetic disorder that conveys a significant risk for the development of social behavior disorders, including autism and schizophrenia. Also known as DiGeorge syndrome, 22q11DS is the second most common genetic disorder and is characterized by an elevated risk for immune dysfunction, up to 77% of individuals have an identifiable immune deficiency. We hypoth…	IL-10	Gene	0.8975622653961182
16_deletion_duplication_16p11_22q11	22q11.2 deletion syndrome (22q11DS) is a genetic disorder that conveys a significant risk for the development of social behavior disorders, including autism and schizophrenia. Also known as DiGeorge syndrome, 22q11DS is the second most common genetic disorder and is characterized by an elevated risk for immune dysfunction, up to 77% of individuals have an identifiable immune deficiency. We hypoth…	cytokines	Gene	0.5845556855201721
16_deletion_duplication_16p11_22q11	22q11.2 deletion syndrome (22q11DS) is a genetic disorder that conveys a significant risk for the development of social behavior disorders, including autism and schizophrenia. Also known as DiGeorge syndrome, 22q11DS is the second most common genetic disorder and is characterized by an elevated risk for immune dysfunction, up to 77% of individuals have an identifiable immune deficiency. We hypoth…	interferon gamma	Gene	0.817357
16_deletion_duplication_16p11_22q11	22q11.2 deletion syndrome (22q11DS) is a genetic disorder that conveys a significant risk for the development of social behavior disorders, including autism and schizophrenia. Also known as DiGeorge syndrome, 22q11DS is the second most common genetic disorder and is characterized by an elevated risk for immune dysfunction, up to 77% of individuals have an identifiable immune deficiency. We hypoth…	IL-12p70	Gene	0.9838007092475891
16_deletion_duplication_16p11_22q11	22q11.2 deletion syndrome (22q11DS) is a genetic disorder that conveys a significant risk for the development of social behavior disorders, including autism and schizophrenia. Also known as DiGeorge syndrome, 22q11DS is the second most common genetic disorder and is characterized by an elevated risk for immune dysfunction, up to 77% of individuals have an identifiable immune deficiency. We hypoth…	IL-12	Gene	0.9928814172744751
16_deletion_duplication_16p11_22q11	22q11.2 deletion syndrome (22q11DS) is a genetic disorder that conveys a significant risk for the development of social behavior disorders, including autism and schizophrenia. Also known as DiGeorge syndrome, 22q11DS is the second most common genetic disorder and is characterized by an elevated risk for immune dysfunction, up to 77% of individuals have an identifiable immune deficiency. We hypoth…	inflammatory cytokines	Gene	0.6622839570045471
2_synaptic_genes_mice_protein	Rare variants in MDGAs (MAM domain-containing glycosylphosphatidylinositol anchors), including multiple protein-truncating deletions, are linked to autism and schizophrenia, but the function of these genes is poorly understood. Here, we show that MDGA1 and MDGA2 bound to neuroligin-2 inhibitory synapse-organizing protein, also implicated in neurodevelopmental disorders. MDGA1 inhibited the synaps…	MDGA1	Gene	0.9831100702285767
2_synaptic_genes_mice_protein	Rare variants in MDGAs (MAM domain-containing glycosylphosphatidylinositol anchors), including multiple protein-truncating deletions, are linked to autism and schizophrenia, but the function of these genes is poorly understood. Here, we show that MDGA1 and MDGA2 bound to neuroligin-2 inhibitory synapse-organizing protein, also implicated in neurodevelopmental disorders. MDGA1 inhibited the synaps…	MDGA2	Gene	0.9749074578285217
2_synaptic_genes_mice_protein	Rare variants in MDGAs (MAM domain-containing glycosylphosphatidylinositol anchors), including multiple protein-truncating deletions, are linked to autism and schizophrenia, but the function of these genes is poorly understood. Here, we show that MDGA1 and MDGA2 bound to neuroligin-2 inhibitory synapse-organizing protein, also implicated in neurodevelopmental disorders. MDGA1 inhibited the synaps…	neuroligin-2	Gene	0.9350548386573792
2_synaptic_genes_mice_protein	Rare variants in MDGAs (MAM domain-containing glycosylphosphatidylinositol anchors), including multiple protein-truncating deletions, are linked to autism and schizophrenia, but the function of these genes is poorly understood. Here, we show that MDGA1 and MDGA2 bound to neuroligin-2 inhibitory synapse-organizing protein, also implicated in neurodevelopmental disorders. MDGA1 inhibited the synaps…	MDGA1	Gene	0.9796332120895386
2_synaptic_genes_mice_protein	Rare variants in MDGAs (MAM domain-containing glycosylphosphatidylinositol anchors), including multiple protein-truncating deletions, are linked to autism and schizophrenia, but the function of these genes is poorly understood. Here, we show that MDGA1 and MDGA2 bound to neuroligin-2 inhibitory synapse-organizing protein, also implicated in neurodevelopmental disorders. MDGA1 inhibited the synaps…	neuroligin-2	Gene	0.9612338542938232
2_synaptic_genes_mice_protein	Rare variants in MDGAs (MAM domain-containing glycosylphosphatidylinositol anchors), including multiple protein-truncating deletions, are linked to autism and schizophrenia, but the function of these genes is poorly understood. Here, we show that MDGA1 and MDGA2 bound to neuroligin-2 inhibitory synapse-organizing protein, also implicated in neurodevelopmental disorders. MDGA1 inhibited the synaps…	neuroligin-2	Gene	0.9193153977394104
2_synaptic_genes_mice_protein	Rare variants in MDGAs (MAM domain-containing glycosylphosphatidylinositol anchors), including multiple protein-truncating deletions, are linked to autism and schizophrenia, but the function of these genes is poorly understood. Here, we show that MDGA1 and MDGA2 bound to neuroligin-2 inhibitory synapse-organizing protein, also implicated in neurodevelopmental disorders. MDGA1 inhibited the synaps…	neuroligin-2	Gene	0.9814425110816956
2_synaptic_genes_mice_protein	Rare variants in MDGAs (MAM domain-containing glycosylphosphatidylinositol anchors), including multiple protein-truncating deletions, are linked to autism and schizophrenia, but the function of these genes is poorly understood. Here, we show that MDGA1 and MDGA2 bound to neuroligin-2 inhibitory synapse-organizing protein, also implicated in neurodevelopmental disorders. MDGA1 inhibited the synaps…	neurexin	Gene	0.8594851493835449
2_synaptic_genes_mice_protein	Rare variants in MDGAs (MAM domain-containing glycosylphosphatidylinositol anchors), including multiple protein-truncating deletions, are linked to autism and schizophrenia, but the function of these genes is poorly understood. Here, we show that MDGA1 and MDGA2 bound to neuroligin-2 inhibitory synapse-organizing protein, also implicated in neurodevelopmental disorders. MDGA1 inhibited the synaps…	MDGA	Gene	0.8523568511009216
2_synaptic_genes_mice_protein	Rare variants in MDGAs (MAM domain-containing glycosylphosphatidylinositol anchors), including multiple protein-truncating deletions, are linked to autism and schizophrenia, but the function of these genes is poorly understood. Here, we show that MDGA1 and MDGA2 bound to neuroligin-2 inhibitory synapse-organizing protein, also implicated in neurodevelopmental disorders. MDGA1 inhibited the synaps…	neuroligin-2	Gene	0.9792405366897583
2_synaptic_genes_mice_protein	Rare variants in MDGAs (MAM domain-containing glycosylphosphatidylinositol anchors), including multiple protein-truncating deletions, are linked to autism and schizophrenia, but the function of these genes is poorly understood. Here, we show that MDGA1 and MDGA2 bound to neuroligin-2 inhibitory synapse-organizing protein, also implicated in neurodevelopmental disorders. MDGA1 inhibited the synaps…	neuroligin-1	Gene	0.9664285778999329
2_synaptic_genes_mice_protein	Rare variants in MDGAs (MAM domain-containing glycosylphosphatidylinositol anchors), including multiple protein-truncating deletions, are linked to autism and schizophrenia, but the function of these genes is poorly understood. Here, we show that MDGA1 and MDGA2 bound to neuroligin-2 inhibitory synapse-organizing protein, also implicated in neurodevelopmental disorders. MDGA1 inhibited the synaps…	MDGA1	Gene	0.9898867011070251
2_synaptic_genes_mice_protein	Rare variants in MDGAs (MAM domain-containing glycosylphosphatidylinositol anchors), including multiple protein-truncating deletions, are linked to autism and schizophrenia, but the function of these genes is poorly understood. Here, we show that MDGA1 and MDGA2 bound to neuroligin-2 inhibitory synapse-organizing protein, also implicated in neurodevelopmental disorders. MDGA1 inhibited the synaps…	MDGA1	Gene	0.9912856221199036
2_synaptic_genes_mice_protein	Rare variants in MDGAs (MAM domain-containing glycosylphosphatidylinositol anchors), including multiple protein-truncating deletions, are linked to autism and schizophrenia, but the function of these genes is poorly understood. Here, we show that MDGA1 and MDGA2 bound to neuroligin-2 inhibitory synapse-organizing protein, also implicated in neurodevelopmental disorders. MDGA1 inhibited the synaps…	MDGA1	Gene	0.9844064712524414
2_synaptic_genes_mice_protein	Rare variants in MDGAs (MAM domain-containing glycosylphosphatidylinositol anchors), including multiple protein-truncating deletions, are linked to autism and schizophrenia, but the function of these genes is poorly understood. Here, we show that MDGA1 and MDGA2 bound to neuroligin-2 inhibitory synapse-organizing protein, also implicated in neurodevelopmental disorders. MDGA1 inhibited the synaps…	MDGAs	Gene	0.7071526646614075
2_synaptic_genes_mice_protein	Rare variants in MDGAs (MAM domain-containing glycosylphosphatidylinositol anchors), including multiple protein-truncating deletions, are linked to autism and schizophrenia, but the function of these genes is poorly understood. Here, we show that MDGA1 and MDGA2 bound to neuroligin-2 inhibitory synapse-organizing protein, also implicated in neurodevelopmental disorders. MDGA1 inhibited the synaps…	neurexin-neuroligin	Gene	0.6936575770378113
120_pten_phts_macrocephaly_mutations	An association between autism and macrocephaly has been previously described. A subset of cases with extreme macrocephaly (>3 standard deviation [SD], 99.7th percentile) have been correlated to mutations in the gene phosphatase and tensin homolog (PTEN). However, the phenotypic and genetic characterization of the remaining cases remains unclear. We report the phenotypic classification and genetic…	phosphatase and tensin homolog	Gene	0.6891515105962753
120_pten_phts_macrocephaly_mutations	An association between autism and macrocephaly has been previously described. A subset of cases with extreme macrocephaly (>3 standard deviation [SD], 99.7th percentile) have been correlated to mutations in the gene phosphatase and tensin homolog (PTEN). However, the phenotypic and genetic characterization of the remaining cases remains unclear. We report the phenotypic classification and genetic…	PTEN	Gene	0.9669784903526306
120_pten_phts_macrocephaly_mutations	An association between autism and macrocephaly has been previously described. A subset of cases with extreme macrocephaly (>3 standard deviation [SD], 99.7th percentile) have been correlated to mutations in the gene phosphatase and tensin homolog (PTEN). However, the phenotypic and genetic characterization of the remaining cases remains unclear. We report the phenotypic classification and genetic…	PTEN	Gene	0.9951079487800598
120_pten_phts_macrocephaly_mutations	An association between autism and macrocephaly has been previously described. A subset of cases with extreme macrocephaly (>3 standard deviation [SD], 99.7th percentile) have been correlated to mutations in the gene phosphatase and tensin homolog (PTEN). However, the phenotypic and genetic characterization of the remaining cases remains unclear. We report the phenotypic classification and genetic…	PTEN	Gene	0.9842214584350586
120_pten_phts_macrocephaly_mutations	An association between autism and macrocephaly has been previously described. A subset of cases with extreme macrocephaly (>3 standard deviation [SD], 99.7th percentile) have been correlated to mutations in the gene phosphatase and tensin homolog (PTEN). However, the phenotypic and genetic characterization of the remaining cases remains unclear. We report the phenotypic classification and genetic…	PTEN	Gene	0.9903786182403564
69_cnvs_cnv_copy_genomic	Rare copy-number variants (CNVs) have been implicated in autism and intellectual disability. These variants are large and affect many genes but lack clear specificity toward autism as opposed to developmental-delay phenotypes. We exploited the repeat architecture of the genome to target segmental duplication-mediated rearrangement hotspots (n = 120, median size 1.78 Mbp, range 240 kbp to 13 Mbp) …	CHD1L	Gene	0.9940155744552612
69_cnvs_cnv_copy_genomic	Rare copy-number variants (CNVs) have been implicated in autism and intellectual disability. These variants are large and affect many genes but lack clear specificity toward autism as opposed to developmental-delay phenotypes. We exploited the repeat architecture of the genome to target segmental duplication-mediated rearrangement hotspots (n = 120, median size 1.78 Mbp, range 240 kbp to 13 Mbp) …	ACACA	Gene	0.9274101257324219
69_cnvs_cnv_copy_genomic	Rare copy-number variants (CNVs) have been implicated in autism and intellectual disability. These variants are large and affect many genes but lack clear specificity toward autism as opposed to developmental-delay phenotypes. We exploited the repeat architecture of the genome to target segmental duplication-mediated rearrangement hotspots (n = 120, median size 1.78 Mbp, range 240 kbp to 13 Mbp) …	DPP10	Gene	0.9921514987945557
69_cnvs_cnv_copy_genomic	Rare copy-number variants (CNVs) have been implicated in autism and intellectual disability. These variants are large and affect many genes but lack clear specificity toward autism as opposed to developmental-delay phenotypes. We exploited the repeat architecture of the genome to target segmental duplication-mediated rearrangement hotspots (n = 120, median size 1.78 Mbp, range 240 kbp to 13 Mbp) …	PLCB1	Gene	0.9901723861694336
69_cnvs_cnv_copy_genomic	Rare copy-number variants (CNVs) have been implicated in autism and intellectual disability. These variants are large and affect many genes but lack clear specificity toward autism as opposed to developmental-delay phenotypes. We exploited the repeat architecture of the genome to target segmental duplication-mediated rearrangement hotspots (n = 120, median size 1.78 Mbp, range 240 kbp to 13 Mbp) …	TRPM1	Gene	0.9972240924835205
69_cnvs_cnv_copy_genomic	Rare copy-number variants (CNVs) have been implicated in autism and intellectual disability. These variants are large and affect many genes but lack clear specificity toward autism as opposed to developmental-delay phenotypes. We exploited the repeat architecture of the genome to target segmental duplication-mediated rearrangement hotspots (n = 120, median size 1.78 Mbp, range 240 kbp to 13 Mbp) …	NRXN1	Gene	0.9975050091743469
69_cnvs_cnv_copy_genomic	Rare copy-number variants (CNVs) have been implicated in autism and intellectual disability. These variants are large and affect many genes but lack clear specificity toward autism as opposed to developmental-delay phenotypes. We exploited the repeat architecture of the genome to target segmental duplication-mediated rearrangement hotspots (n = 120, median size 1.78 Mbp, range 240 kbp to 13 Mbp) …	FHIT	Gene	0.9940551519393921
69_cnvs_cnv_copy_genomic	Rare copy-number variants (CNVs) have been implicated in autism and intellectual disability. These variants are large and affect many genes but lack clear specificity toward autism as opposed to developmental-delay phenotypes. We exploited the repeat architecture of the genome to target segmental duplication-mediated rearrangement hotspots (n = 120, median size 1.78 Mbp, range 240 kbp to 13 Mbp) …	HYDIN	Gene	0.9795089960098267
2_synaptic_genes_mice_protein	The GPHN gene codes for gephyrin, a key scaffolding protein in the neuronal postsynaptic membrane, responsible for the clustering and localization of glycine and GABA receptors at inhibitory synapses. Gephyrin has well-established functional links with several synaptic proteins that have been implicated in genetic risk for neurodevelopmental disorders such as autism spectrum disorder (ASD), schiz…	GPHN	Gene	0.960656
2_synaptic_genes_mice_protein	The GPHN gene codes for gephyrin, a key scaffolding protein in the neuronal postsynaptic membrane, responsible for the clustering and localization of glycine and GABA receptors at inhibitory synapses. Gephyrin has well-established functional links with several synaptic proteins that have been implicated in genetic risk for neurodevelopmental disorders such as autism spectrum disorder (ASD), schiz…	gephyrin	Gene	0.9333474040031433
2_synaptic_genes_mice_protein	The GPHN gene codes for gephyrin, a key scaffolding protein in the neuronal postsynaptic membrane, responsible for the clustering and localization of glycine and GABA receptors at inhibitory synapses. Gephyrin has well-established functional links with several synaptic proteins that have been implicated in genetic risk for neurodevelopmental disorders such as autism spectrum disorder (ASD), schiz…	Gephyrin	Gene	0.9653528332710266
2_synaptic_genes_mice_protein	The GPHN gene codes for gephyrin, a key scaffolding protein in the neuronal postsynaptic membrane, responsible for the clustering and localization of glycine and GABA receptors at inhibitory synapses. Gephyrin has well-established functional links with several synaptic proteins that have been implicated in genetic risk for neurodevelopmental disorders such as autism spectrum disorder (ASD), schiz…	NLGN2	Gene	0.9932859539985657
2_synaptic_genes_mice_protein	The GPHN gene codes for gephyrin, a key scaffolding protein in the neuronal postsynaptic membrane, responsible for the clustering and localization of glycine and GABA receptors at inhibitory synapses. Gephyrin has well-established functional links with several synaptic proteins that have been implicated in genetic risk for neurodevelopmental disorders such as autism spectrum disorder (ASD), schiz…	NLGN4	Gene	0.9965971112251282
2_synaptic_genes_mice_protein	The GPHN gene codes for gephyrin, a key scaffolding protein in the neuronal postsynaptic membrane, responsible for the clustering and localization of glycine and GABA receptors at inhibitory synapses. Gephyrin has well-established functional links with several synaptic proteins that have been implicated in genetic risk for neurodevelopmental disorders such as autism spectrum disorder (ASD), schiz…	neurexins	Gene	0.7682044506072998
2_synaptic_genes_mice_protein	The GPHN gene codes for gephyrin, a key scaffolding protein in the neuronal postsynaptic membrane, responsible for the clustering and localization of glycine and GABA receptors at inhibitory synapses. Gephyrin has well-established functional links with several synaptic proteins that have been implicated in genetic risk for neurodevelopmental disorders such as autism spectrum disorder (ASD), schiz…	NRXN1	Gene	0.9972506165504456
2_synaptic_genes_mice_protein	The GPHN gene codes for gephyrin, a key scaffolding protein in the neuronal postsynaptic membrane, responsible for the clustering and localization of glycine and GABA receptors at inhibitory synapses. Gephyrin has well-established functional links with several synaptic proteins that have been implicated in genetic risk for neurodevelopmental disorders such as autism spectrum disorder (ASD), schiz…	NRXN2	Gene	0.9989359974861145
2_synaptic_genes_mice_protein	The GPHN gene codes for gephyrin, a key scaffolding protein in the neuronal postsynaptic membrane, responsible for the clustering and localization of glycine and GABA receptors at inhibitory synapses. Gephyrin has well-established functional links with several synaptic proteins that have been implicated in genetic risk for neurodevelopmental disorders such as autism spectrum disorder (ASD), schiz…	NRXN3	Gene	0.9983685612678528
2_synaptic_genes_mice_protein	The GPHN gene codes for gephyrin, a key scaffolding protein in the neuronal postsynaptic membrane, responsible for the clustering and localization of glycine and GABA receptors at inhibitory synapses. Gephyrin has well-established functional links with several synaptic proteins that have been implicated in genetic risk for neurodevelopmental disorders such as autism spectrum disorder (ASD), schiz…	collybistin	Gene	0.9605617523193359
2_synaptic_genes_mice_protein	The GPHN gene codes for gephyrin, a key scaffolding protein in the neuronal postsynaptic membrane, responsible for the clustering and localization of glycine and GABA receptors at inhibitory synapses. Gephyrin has well-established functional links with several synaptic proteins that have been implicated in genetic risk for neurodevelopmental disorders such as autism spectrum disorder (ASD), schiz…	ARHGEF9	Gene	0.9986425042152405
2_synaptic_genes_mice_protein	The GPHN gene codes for gephyrin, a key scaffolding protein in the neuronal postsynaptic membrane, responsible for the clustering and localization of glycine and GABA receptors at inhibitory synapses. Gephyrin has well-established functional links with several synaptic proteins that have been implicated in genetic risk for neurodevelopmental disorders such as autism spectrum disorder (ASD), schiz…	GPHN	Gene	0.98259
2_synaptic_genes_mice_protein	The GPHN gene codes for gephyrin, a key scaffolding protein in the neuronal postsynaptic membrane, responsible for the clustering and localization of glycine and GABA receptors at inhibitory synapses. Gephyrin has well-established functional links with several synaptic proteins that have been implicated in genetic risk for neurodevelopmental disorders such as autism spectrum disorder (ASD), schiz…	gephyrin	Gene	0.7464513182640076
2_synaptic_genes_mice_protein	The GPHN gene codes for gephyrin, a key scaffolding protein in the neuronal postsynaptic membrane, responsible for the clustering and localization of glycine and GABA receptors at inhibitory synapses. Gephyrin has well-established functional links with several synaptic proteins that have been implicated in genetic risk for neurodevelopmental disorders such as autism spectrum disorder (ASD), schiz…	GPHN	Gene	0.991699
2_synaptic_genes_mice_protein	The GPHN gene codes for gephyrin, a key scaffolding protein in the neuronal postsynaptic membrane, responsible for the clustering and localization of glycine and GABA receptors at inhibitory synapses. Gephyrin has well-established functional links with several synaptic proteins that have been implicated in genetic risk for neurodevelopmental disorders such as autism spectrum disorder (ASD), schiz…	gephyrin	Gene	0.8856924176216125
2_synaptic_genes_mice_protein	The GPHN gene codes for gephyrin, a key scaffolding protein in the neuronal postsynaptic membrane, responsible for the clustering and localization of glycine and GABA receptors at inhibitory synapses. Gephyrin has well-established functional links with several synaptic proteins that have been implicated in genetic risk for neurodevelopmental disorders such as autism spectrum disorder (ASD), schiz…	GPHN	Gene	0.9934925436973572
2_synaptic_genes_mice_protein	The GPHN gene codes for gephyrin, a key scaffolding protein in the neuronal postsynaptic membrane, responsible for the clustering and localization of glycine and GABA receptors at inhibitory synapses. Gephyrin has well-established functional links with several synaptic proteins that have been implicated in genetic risk for neurodevelopmental disorders such as autism spectrum disorder (ASD), schiz…	GPHN	Gene	0.9804139733314514
17_methylation_epigenetic_dna_genes	5-Hydroxytryptamine 2A receptors (5-HT2A-Rs) are widely expressed in the brain and have been implicated in mood and behavior. Based on the use of atypical antipsychotics in schizophrenia, antagonism of 5-HT2A-Rs initially emerged as a potential intervention capable of reducing the incidence of extrapyramidal symptoms, while exerting an effective antipsychotic action. More recently, highly selecti…	5-Hydroxytryptamine 2A receptors	Gene	0.8836355805397034
17_methylation_epigenetic_dna_genes	5-Hydroxytryptamine 2A receptors (5-HT2A-Rs) are widely expressed in the brain and have been implicated in mood and behavior. Based on the use of atypical antipsychotics in schizophrenia, antagonism of 5-HT2A-Rs initially emerged as a potential intervention capable of reducing the incidence of extrapyramidal symptoms, while exerting an effective antipsychotic action. More recently, highly selecti…	5-HT2A-Rs	Gene	0.949026
17_methylation_epigenetic_dna_genes	5-Hydroxytryptamine 2A receptors (5-HT2A-Rs) are widely expressed in the brain and have been implicated in mood and behavior. Based on the use of atypical antipsychotics in schizophrenia, antagonism of 5-HT2A-Rs initially emerged as a potential intervention capable of reducing the incidence of extrapyramidal symptoms, while exerting an effective antipsychotic action. More recently, highly selecti…	5-HT2A-Rs	Gene	0.9343039393424988
17_methylation_epigenetic_dna_genes	5-Hydroxytryptamine 2A receptors (5-HT2A-Rs) are widely expressed in the brain and have been implicated in mood and behavior. Based on the use of atypical antipsychotics in schizophrenia, antagonism of 5-HT2A-Rs initially emerged as a potential intervention capable of reducing the incidence of extrapyramidal symptoms, while exerting an effective antipsychotic action. More recently, highly selecti…	5-HT2A-R	Gene	0.9855520129203796
17_methylation_epigenetic_dna_genes	5-Hydroxytryptamine 2A receptors (5-HT2A-Rs) are widely expressed in the brain and have been implicated in mood and behavior. Based on the use of atypical antipsychotics in schizophrenia, antagonism of 5-HT2A-Rs initially emerged as a potential intervention capable of reducing the incidence of extrapyramidal symptoms, while exerting an effective antipsychotic action. More recently, highly selecti…	5-HT2A-R	Gene	0.9943865537643433
17_methylation_epigenetic_dna_genes	5-Hydroxytryptamine 2A receptors (5-HT2A-Rs) are widely expressed in the brain and have been implicated in mood and behavior. Based on the use of atypical antipsychotics in schizophrenia, antagonism of 5-HT2A-Rs initially emerged as a potential intervention capable of reducing the incidence of extrapyramidal symptoms, while exerting an effective antipsychotic action. More recently, highly selecti…	5-HT2A-Rs	Gene	0.9770186543464661
17_methylation_epigenetic_dna_genes	5-Hydroxytryptamine 2A receptors (5-HT2A-Rs) are widely expressed in the brain and have been implicated in mood and behavior. Based on the use of atypical antipsychotics in schizophrenia, antagonism of 5-HT2A-Rs initially emerged as a potential intervention capable of reducing the incidence of extrapyramidal symptoms, while exerting an effective antipsychotic action. More recently, highly selecti…	5-HT2A-Rs	Gene	0.968004
17_methylation_epigenetic_dna_genes	5-Hydroxytryptamine 2A receptors (5-HT2A-Rs) are widely expressed in the brain and have been implicated in mood and behavior. Based on the use of atypical antipsychotics in schizophrenia, antagonism of 5-HT2A-Rs initially emerged as a potential intervention capable of reducing the incidence of extrapyramidal symptoms, while exerting an effective antipsychotic action. More recently, highly selecti…	5-HT2A-R	Gene	0.993649
17_methylation_epigenetic_dna_genes	5-Hydroxytryptamine 2A receptors (5-HT2A-Rs) are widely expressed in the brain and have been implicated in mood and behavior. Based on the use of atypical antipsychotics in schizophrenia, antagonism of 5-HT2A-Rs initially emerged as a potential intervention capable of reducing the incidence of extrapyramidal symptoms, while exerting an effective antipsychotic action. More recently, highly selecti…	5-HT2A-R	Gene	0.9845974445343018
38_mirnas_mir_mirna_expression	The cortical area map is initially patterned by transcription factor (TF) gradients in the neocortical primordium, which define a "protomap" in the embryonic ventricular zone (VZ). However, mechanisms that propagate regional identity from VZ progenitors to cortical plate (CP) neurons are unknown. Here we show that the VZ, subventricular zone (SVZ), and CP contain distinct molecular maps of region…	Eomes	Gene	0.9856982827186584
38_mirnas_mir_mirna_expression	The cortical area map is initially patterned by transcription factor (TF) gradients in the neocortical primordium, which define a "protomap" in the embryonic ventricular zone (VZ). However, mechanisms that propagate regional identity from VZ progenitors to cortical plate (CP) neurons are unknown. Here we show that the VZ, subventricular zone (SVZ), and CP contain distinct molecular maps of region…	Tbr2	Gene	0.9945530295372009
38_mirnas_mir_mirna_expression	The cortical area map is initially patterned by transcription factor (TF) gradients in the neocortical primordium, which define a "protomap" in the embryonic ventricular zone (VZ). However, mechanisms that propagate regional identity from VZ progenitors to cortical plate (CP) neurons are unknown. Here we show that the VZ, subventricular zone (SVZ), and CP contain distinct molecular maps of region…	Eomes	Gene	0.9512491822242737
38_mirnas_mir_mirna_expression	The cortical area map is initially patterned by transcription factor (TF) gradients in the neocortical primordium, which define a "protomap" in the embryonic ventricular zone (VZ). However, mechanisms that propagate regional identity from VZ progenitors to cortical plate (CP) neurons are unknown. Here we show that the VZ, subventricular zone (SVZ), and CP contain distinct molecular maps of region…	Pax6	Gene	0.9863846898078918
38_mirnas_mir_mirna_expression	The cortical area map is initially patterned by transcription factor (TF) gradients in the neocortical primordium, which define a "protomap" in the embryonic ventricular zone (VZ). However, mechanisms that propagate regional identity from VZ progenitors to cortical plate (CP) neurons are unknown. Here we show that the VZ, subventricular zone (SVZ), and CP contain distinct molecular maps of region…	Eomes	Gene	0.972791
38_mirnas_mir_mirna_expression	The cortical area map is initially patterned by transcription factor (TF) gradients in the neocortical primordium, which define a "protomap" in the embryonic ventricular zone (VZ). However, mechanisms that propagate regional identity from VZ progenitors to cortical plate (CP) neurons are unknown. Here we show that the VZ, subventricular zone (SVZ), and CP contain distinct molecular maps of region…	Tbr1	Gene	0.9979296922683716
38_mirnas_mir_mirna_expression	The cortical area map is initially patterned by transcription factor (TF) gradients in the neocortical primordium, which define a "protomap" in the embryonic ventricular zone (VZ). However, mechanisms that propagate regional identity from VZ progenitors to cortical plate (CP) neurons are unknown. Here we show that the VZ, subventricular zone (SVZ), and CP contain distinct molecular maps of region…	PAX6	Gene	0.9935315251350403
38_mirnas_mir_mirna_expression	The cortical area map is initially patterned by transcription factor (TF) gradients in the neocortical primordium, which define a "protomap" in the embryonic ventricular zone (VZ). However, mechanisms that propagate regional identity from VZ progenitors to cortical plate (CP) neurons are unknown. Here we show that the VZ, subventricular zone (SVZ), and CP contain distinct molecular maps of region…	EOMES	Gene	0.9800844192504883
38_mirnas_mir_mirna_expression	The cortical area map is initially patterned by transcription factor (TF) gradients in the neocortical primordium, which define a "protomap" in the embryonic ventricular zone (VZ). However, mechanisms that propagate regional identity from VZ progenitors to cortical plate (CP) neurons are unknown. Here we show that the VZ, subventricular zone (SVZ), and CP contain distinct molecular maps of region…	TBR1	Gene	0.9895379543304443
2_synaptic_genes_mice_protein	Many studies have supported a genetic aetiology for autism. Neuroligins are postsynaptically located cell-adhesion molecules. Mutations in two X-linked neuroligin genes, NLGN3 and NLGN4, have been implicated in pathogenesis of autism. In order to confirm these causative mutations in our autistic population and to determine their frequency we screened 20 individuals affected with autism. We identi…	neuroligin	Gene	0.4110107719898224
2_synaptic_genes_mice_protein	Many studies have supported a genetic aetiology for autism. Neuroligins are postsynaptically located cell-adhesion molecules. Mutations in two X-linked neuroligin genes, NLGN3 and NLGN4, have been implicated in pathogenesis of autism. In order to confirm these causative mutations in our autistic population and to determine their frequency we screened 20 individuals affected with autism. We identi…	NLGN3	Gene	0.9888511300086975
2_synaptic_genes_mice_protein	Many studies have supported a genetic aetiology for autism. Neuroligins are postsynaptically located cell-adhesion molecules. Mutations in two X-linked neuroligin genes, NLGN3 and NLGN4, have been implicated in pathogenesis of autism. In order to confirm these causative mutations in our autistic population and to determine their frequency we screened 20 individuals affected with autism. We identi…	NLGN4	Gene	0.9924193024635315
2_synaptic_genes_mice_protein	Many studies have supported a genetic aetiology for autism. Neuroligins are postsynaptically located cell-adhesion molecules. Mutations in two X-linked neuroligin genes, NLGN3 and NLGN4, have been implicated in pathogenesis of autism. In order to confirm these causative mutations in our autistic population and to determine their frequency we screened 20 individuals affected with autism. We identi…	NLGN4	Gene	0.9985116124153137
2_synaptic_genes_mice_protein	Many studies have supported a genetic aetiology for autism. Neuroligins are postsynaptically located cell-adhesion molecules. Mutations in two X-linked neuroligin genes, NLGN3 and NLGN4, have been implicated in pathogenesis of autism. In order to confirm these causative mutations in our autistic population and to determine their frequency we screened 20 individuals affected with autism. We identi…	NLGN3	Gene	0.9981229901313782
2_synaptic_genes_mice_protein	The term "Autism Spectrum" is often used to describe disorders that are currently classified as Pervasive Developmental Disorders. These disorders are typically characterized by social deficits, communication difficulties, stereotyped or repetitive behaviors and/or cognitive delays or mental retardation; sometimes they present high comorbidity rates with epilepsy. Although these diagnoses share s…	mGlu5	Gene	0.8665423393249512
17_methylation_epigenetic_dna_genes	Post-translational modification of histones is a primary mechanism through which epigenetic regulation of DNA transcription does occur. Among these modifications, regulation of histone acetylation state is an important tool to influence gene expression. Epigenetic regulation of neurodevelopment contributes to the structural and functional shaping of the brain during neurogenesis and continues to …	histones	Gene	0.6029961705207825
17_methylation_epigenetic_dna_genes	Post-translational modification of histones is a primary mechanism through which epigenetic regulation of DNA transcription does occur. Among these modifications, regulation of histone acetylation state is an important tool to influence gene expression. Epigenetic regulation of neurodevelopment contributes to the structural and functional shaping of the brain during neurogenesis and continues to …	histone deacetylase	Gene	0.719864
31_genetic_psychiatric_schizophrenia_polygenic	Findings from family and twin studies suggest that genetic contributions to psychiatric disorders do not in all cases map to present diagnostic categories. We aimed to identify specific variants underlying genetic effects shared between the five disorders in the Psychiatric Genomics Consortium: autism spectrum disorder, attention deficit-hyperactivity disorder, bipolar disorder, major depressive …	CACNA1C	Gene	0.9939107894897461
31_genetic_psychiatric_schizophrenia_polygenic	Findings from family and twin studies suggest that genetic contributions to psychiatric disorders do not in all cases map to present diagnostic categories. We aimed to identify specific variants underlying genetic effects shared between the five disorders in the Psychiatric Genomics Consortium: autism spectrum disorder, attention deficit-hyperactivity disorder, bipolar disorder, major depressive …	CACNB2	Gene	0.9973471164703369
16_deletion_duplication_16p11_22q11	Duplications of the 2q33 region are rare; to date, only 13 patients have been reported to have this chromosomal abnormality. The reported duplications are of varying size, and the patients shared developmental delay and minor dysmorphic findings. In this study, we identified a duplication of 2q32.1-q33.3 in a patient with psychomotor developmental delay, epilepsy, and autistic behavior. The dupli…	SATB homeobox 2	Gene	0.6169436573982239
16_deletion_duplication_16p11_22q11	Duplications of the 2q33 region are rare; to date, only 13 patients have been reported to have this chromosomal abnormality. The reported duplications are of varying size, and the patients shared developmental delay and minor dysmorphic findings. In this study, we identified a duplication of 2q32.1-q33.3 in a patient with psychomotor developmental delay, epilepsy, and autistic behavior. The dupli…	SATB2	Gene	0.9672790765762329
16_deletion_duplication_16p11_22q11	Duplications of the 2q33 region are rare; to date, only 13 patients have been reported to have this chromosomal abnormality. The reported duplications are of varying size, and the patients shared developmental delay and minor dysmorphic findings. In this study, we identified a duplication of 2q32.1-q33.3 in a patient with psychomotor developmental delay, epilepsy, and autistic behavior. The dupli…	potassium channel tetramerisation domain-containing 18	Gene	0.5664261102676391
16_deletion_duplication_16p11_22q11	Duplications of the 2q33 region are rare; to date, only 13 patients have been reported to have this chromosomal abnormality. The reported duplications are of varying size, and the patients shared developmental delay and minor dysmorphic findings. In this study, we identified a duplication of 2q32.1-q33.3 in a patient with psychomotor developmental delay, epilepsy, and autistic behavior. The dupli…	KCTD18	Gene	0.8818312883377075
16_deletion_duplication_16p11_22q11	Duplications of the 2q33 region are rare; to date, only 13 patients have been reported to have this chromosomal abnormality. The reported duplications are of varying size, and the patients shared developmental delay and minor dysmorphic findings. In this study, we identified a duplication of 2q32.1-q33.3 in a patient with psychomotor developmental delay, epilepsy, and autistic behavior. The dupli…	ADAM23	Gene	0.9914286732673645
17_methylation_epigenetic_dna_genes	Autism is a complex neurodevelopmental disorder that has significant phenotypic overlap with several diseases, many of which fall within the broader category of autism spectrum disorders (ASDs). The etiology of the disorder is unclear and seems to involve a complex interplay of polygenic as well as environmental factors. We discuss evidence that suggests that epigenetic dysregulation is highly im…	UBE3A	Gene	0.9370872974395752
17_methylation_epigenetic_dna_genes	Autism is a complex neurodevelopmental disorder that has significant phenotypic overlap with several diseases, many of which fall within the broader category of autism spectrum disorders (ASDs). The etiology of the disorder is unclear and seems to involve a complex interplay of polygenic as well as environmental factors. We discuss evidence that suggests that epigenetic dysregulation is highly im…	RELN	Gene	0.9685986638069153
17_methylation_epigenetic_dna_genes	Autism is a complex neurodevelopmental disorder that has significant phenotypic overlap with several diseases, many of which fall within the broader category of autism spectrum disorders (ASDs). The etiology of the disorder is unclear and seems to involve a complex interplay of polygenic as well as environmental factors. We discuss evidence that suggests that epigenetic dysregulation is highly im…	MeCP2	Gene	0.9480735659599304
31_genetic_psychiatric_schizophrenia_polygenic	Humans express at least seven alcohol dehydrogenase (ADH) isoforms that are encoded by ADH gene cluster (ADH7-ADH1C-ADH1B-ADH1A-ADH6-ADH4-ADH5) at chromosome 4. ADHs are key catabolic enzymes for retinol and ethanol. The functional ADH variants (mostly rare) have been implicated in alcoholism risk. In addition to catalyzing the oxidation of retinol and ethanol, ADHs may be involved in the metabol…	alcohol dehydrogenase	Gene	0.8167628347873688
31_genetic_psychiatric_schizophrenia_polygenic	Humans express at least seven alcohol dehydrogenase (ADH) isoforms that are encoded by ADH gene cluster (ADH7-ADH1C-ADH1B-ADH1A-ADH6-ADH4-ADH5) at chromosome 4. ADHs are key catabolic enzymes for retinol and ethanol. The functional ADH variants (mostly rare) have been implicated in alcoholism risk. In addition to catalyzing the oxidation of retinol and ethanol, ADHs may be involved in the metabol…	ADH	Gene	0.9613860845565796
31_genetic_psychiatric_schizophrenia_polygenic	Humans express at least seven alcohol dehydrogenase (ADH) isoforms that are encoded by ADH gene cluster (ADH7-ADH1C-ADH1B-ADH1A-ADH6-ADH4-ADH5) at chromosome 4. ADHs are key catabolic enzymes for retinol and ethanol. The functional ADH variants (mostly rare) have been implicated in alcoholism risk. In addition to catalyzing the oxidation of retinol and ethanol, ADHs may be involved in the metabol…	ADH	Gene	0.8900485634803772
31_genetic_psychiatric_schizophrenia_polygenic	Humans express at least seven alcohol dehydrogenase (ADH) isoforms that are encoded by ADH gene cluster (ADH7-ADH1C-ADH1B-ADH1A-ADH6-ADH4-ADH5) at chromosome 4. ADHs are key catabolic enzymes for retinol and ethanol. The functional ADH variants (mostly rare) have been implicated in alcoholism risk. In addition to catalyzing the oxidation of retinol and ethanol, ADHs may be involved in the metabol…	ADH7-ADH1C-ADH1B-ADH1A-ADH6-ADH4-ADH5	Gene	0.9693841338157654
31_genetic_psychiatric_schizophrenia_polygenic	Humans express at least seven alcohol dehydrogenase (ADH) isoforms that are encoded by ADH gene cluster (ADH7-ADH1C-ADH1B-ADH1A-ADH6-ADH4-ADH5) at chromosome 4. ADHs are key catabolic enzymes for retinol and ethanol. The functional ADH variants (mostly rare) have been implicated in alcoholism risk. In addition to catalyzing the oxidation of retinol and ethanol, ADHs may be involved in the metabol…	ADHs	Gene	0.9288201928138733
31_genetic_psychiatric_schizophrenia_polygenic	Humans express at least seven alcohol dehydrogenase (ADH) isoforms that are encoded by ADH gene cluster (ADH7-ADH1C-ADH1B-ADH1A-ADH6-ADH4-ADH5) at chromosome 4. ADHs are key catabolic enzymes for retinol and ethanol. The functional ADH variants (mostly rare) have been implicated in alcoholism risk. In addition to catalyzing the oxidation of retinol and ethanol, ADHs may be involved in the metabol…	ADH	Gene	0.8809241056442261
31_genetic_psychiatric_schizophrenia_polygenic	Humans express at least seven alcohol dehydrogenase (ADH) isoforms that are encoded by ADH gene cluster (ADH7-ADH1C-ADH1B-ADH1A-ADH6-ADH4-ADH5) at chromosome 4. ADHs are key catabolic enzymes for retinol and ethanol. The functional ADH variants (mostly rare) have been implicated in alcoholism risk. In addition to catalyzing the oxidation of retinol and ethanol, ADHs may be involved in the metabol…	ADHs	Gene	0.9025105237960815
31_genetic_psychiatric_schizophrenia_polygenic	Humans express at least seven alcohol dehydrogenase (ADH) isoforms that are encoded by ADH gene cluster (ADH7-ADH1C-ADH1B-ADH1A-ADH6-ADH4-ADH5) at chromosome 4. ADHs are key catabolic enzymes for retinol and ethanol. The functional ADH variants (mostly rare) have been implicated in alcoholism risk. In addition to catalyzing the oxidation of retinol and ethanol, ADHs may be involved in the metabol…	ADH	Gene	0.919041
31_genetic_psychiatric_schizophrenia_polygenic	Humans express at least seven alcohol dehydrogenase (ADH) isoforms that are encoded by ADH gene cluster (ADH7-ADH1C-ADH1B-ADH1A-ADH6-ADH4-ADH5) at chromosome 4. ADHs are key catabolic enzymes for retinol and ethanol. The functional ADH variants (mostly rare) have been implicated in alcoholism risk. In addition to catalyzing the oxidation of retinol and ethanol, ADHs may be involved in the metabol…	ADH	Gene	0.9830547571182251
31_genetic_psychiatric_schizophrenia_polygenic	Humans express at least seven alcohol dehydrogenase (ADH) isoforms that are encoded by ADH gene cluster (ADH7-ADH1C-ADH1B-ADH1A-ADH6-ADH4-ADH5) at chromosome 4. ADHs are key catabolic enzymes for retinol and ethanol. The functional ADH variants (mostly rare) have been implicated in alcoholism risk. In addition to catalyzing the oxidation of retinol and ethanol, ADHs may be involved in the metabol…	ADH	Gene	0.721993
31_genetic_psychiatric_schizophrenia_polygenic	Aberrant connectivity is implicated in many neurological and psychiatric disorders, including Alzheimer's disease and schizophrenia. However, other than a few disease-associated candidate genes, we know little about the degree to which genetics play a role in the brain networks; we know even less about specific genes that influence brain connections. Twin and family-based studies can generate est…	SPON1	Gene	0.9932770133018494
31_genetic_psychiatric_schizophrenia_polygenic	Aberrant connectivity is implicated in many neurological and psychiatric disorders, including Alzheimer's disease and schizophrenia. However, other than a few disease-associated candidate genes, we know little about the degree to which genetics play a role in the brain networks; we know even less about specific genes that influence brain connections. Twin and family-based studies can generate est…	MACROD2	Gene	0.9853019118309021
31_genetic_psychiatric_schizophrenia_polygenic	Aberrant connectivity is implicated in many neurological and psychiatric disorders, including Alzheimer's disease and schizophrenia. However, other than a few disease-associated candidate genes, we know little about the degree to which genetics play a role in the brain networks; we know even less about specific genes that influence brain connections. Twin and family-based studies can generate est…	NEDD4	Gene	0.9825916290283203
31_genetic_psychiatric_schizophrenia_polygenic	Aberrant connectivity is implicated in many neurological and psychiatric disorders, including Alzheimer's disease and schizophrenia. However, other than a few disease-associated candidate genes, we know little about the degree to which genetics play a role in the brain networks; we know even less about specific genes that influence brain connections. Twin and family-based studies can generate est…	UBE2A	Gene	0.9776768088340759
2_synaptic_genes_mice_protein	LIS1 (PAFAH1B1) mutation can impair neuronal migration, causing lissencephaly in humans. LIS1 loss is associated with dynein protein motor dysfunction, and disrupts the actin cytoskeleton through disregulated RhoGTPases. Recently, LIS1 was implicated as an important protein-network interaction node with high-risk autism spectrum disorder genes expressed in the synapse. How LIS1 might participate …	LIS1	Gene	0.9750834703445435
2_synaptic_genes_mice_protein	LIS1 (PAFAH1B1) mutation can impair neuronal migration, causing lissencephaly in humans. LIS1 loss is associated with dynein protein motor dysfunction, and disrupts the actin cytoskeleton through disregulated RhoGTPases. Recently, LIS1 was implicated as an important protein-network interaction node with high-risk autism spectrum disorder genes expressed in the synapse. How LIS1 might participate …	PAFAH1B1	Gene	0.9948380589485168
2_synaptic_genes_mice_protein	LIS1 (PAFAH1B1) mutation can impair neuronal migration, causing lissencephaly in humans. LIS1 loss is associated with dynein protein motor dysfunction, and disrupts the actin cytoskeleton through disregulated RhoGTPases. Recently, LIS1 was implicated as an important protein-network interaction node with high-risk autism spectrum disorder genes expressed in the synapse. How LIS1 might participate …	LIS1	Gene	0.9657658934593201
2_synaptic_genes_mice_protein	LIS1 (PAFAH1B1) mutation can impair neuronal migration, causing lissencephaly in humans. LIS1 loss is associated with dynein protein motor dysfunction, and disrupts the actin cytoskeleton through disregulated RhoGTPases. Recently, LIS1 was implicated as an important protein-network interaction node with high-risk autism spectrum disorder genes expressed in the synapse. How LIS1 might participate …	actin	Gene	0.6979014277458191
2_synaptic_genes_mice_protein	LIS1 (PAFAH1B1) mutation can impair neuronal migration, causing lissencephaly in humans. LIS1 loss is associated with dynein protein motor dysfunction, and disrupts the actin cytoskeleton through disregulated RhoGTPases. Recently, LIS1 was implicated as an important protein-network interaction node with high-risk autism spectrum disorder genes expressed in the synapse. How LIS1 might participate …	LIS1	Gene	0.9810670614242554
2_synaptic_genes_mice_protein	LIS1 (PAFAH1B1) mutation can impair neuronal migration, causing lissencephaly in humans. LIS1 loss is associated with dynein protein motor dysfunction, and disrupts the actin cytoskeleton through disregulated RhoGTPases. Recently, LIS1 was implicated as an important protein-network interaction node with high-risk autism spectrum disorder genes expressed in the synapse. How LIS1 might participate …	LIS1	Gene	0.9776972532272339
2_synaptic_genes_mice_protein	LIS1 (PAFAH1B1) mutation can impair neuronal migration, causing lissencephaly in humans. LIS1 loss is associated with dynein protein motor dysfunction, and disrupts the actin cytoskeleton through disregulated RhoGTPases. Recently, LIS1 was implicated as an important protein-network interaction node with high-risk autism spectrum disorder genes expressed in the synapse. How LIS1 might participate …	LIS1	Gene	0.986085
2_synaptic_genes_mice_protein	LIS1 (PAFAH1B1) mutation can impair neuronal migration, causing lissencephaly in humans. LIS1 loss is associated with dynein protein motor dysfunction, and disrupts the actin cytoskeleton through disregulated RhoGTPases. Recently, LIS1 was implicated as an important protein-network interaction node with high-risk autism spectrum disorder genes expressed in the synapse. How LIS1 might participate …	actin-rich	Gene	0.7622142434120178
2_synaptic_genes_mice_protein	LIS1 (PAFAH1B1) mutation can impair neuronal migration, causing lissencephaly in humans. LIS1 loss is associated with dynein protein motor dysfunction, and disrupts the actin cytoskeleton through disregulated RhoGTPases. Recently, LIS1 was implicated as an important protein-network interaction node with high-risk autism spectrum disorder genes expressed in the synapse. How LIS1 might participate …	Lis1	Gene	0.9956596493721008
2_synaptic_genes_mice_protein	LIS1 (PAFAH1B1) mutation can impair neuronal migration, causing lissencephaly in humans. LIS1 loss is associated with dynein protein motor dysfunction, and disrupts the actin cytoskeleton through disregulated RhoGTPases. Recently, LIS1 was implicated as an important protein-network interaction node with high-risk autism spectrum disorder genes expressed in the synapse. How LIS1 might participate …	Lis1	Gene	0.9932176470756531
2_synaptic_genes_mice_protein	LIS1 (PAFAH1B1) mutation can impair neuronal migration, causing lissencephaly in humans. LIS1 loss is associated with dynein protein motor dysfunction, and disrupts the actin cytoskeleton through disregulated RhoGTPases. Recently, LIS1 was implicated as an important protein-network interaction node with high-risk autism spectrum disorder genes expressed in the synapse. How LIS1 might participate …	RhoA	Gene	0.9300206899642944
2_synaptic_genes_mice_protein	LIS1 (PAFAH1B1) mutation can impair neuronal migration, causing lissencephaly in humans. LIS1 loss is associated with dynein protein motor dysfunction, and disrupts the actin cytoskeleton through disregulated RhoGTPases. Recently, LIS1 was implicated as an important protein-network interaction node with high-risk autism spectrum disorder genes expressed in the synapse. How LIS1 might participate …	Lis1	Gene	0.9953219294548035
2_synaptic_genes_mice_protein	LIS1 (PAFAH1B1) mutation can impair neuronal migration, causing lissencephaly in humans. LIS1 loss is associated with dynein protein motor dysfunction, and disrupts the actin cytoskeleton through disregulated RhoGTPases. Recently, LIS1 was implicated as an important protein-network interaction node with high-risk autism spectrum disorder genes expressed in the synapse. How LIS1 might participate …	Lis1	Gene	0.9946446418762207
2_synaptic_genes_mice_protein	LIS1 (PAFAH1B1) mutation can impair neuronal migration, causing lissencephaly in humans. LIS1 loss is associated with dynein protein motor dysfunction, and disrupts the actin cytoskeleton through disregulated RhoGTPases. Recently, LIS1 was implicated as an important protein-network interaction node with high-risk autism spectrum disorder genes expressed in the synapse. How LIS1 might participate …	Lis1	Gene	0.9924219250679016
2_synaptic_genes_mice_protein	LIS1 (PAFAH1B1) mutation can impair neuronal migration, causing lissencephaly in humans. LIS1 loss is associated with dynein protein motor dysfunction, and disrupts the actin cytoskeleton through disregulated RhoGTPases. Recently, LIS1 was implicated as an important protein-network interaction node with high-risk autism spectrum disorder genes expressed in the synapse. How LIS1 might participate …	LIS1	Gene	0.9854524731636047
16_deletion_duplication_16p11_22q11	Deletions at 2p16.3 involving exons of NRXN1 are associated with susceptibility for autism and schizophrenia, and similar deletions have been identified in individuals with developmental delay and dysmorphic features. We have identified 34 probands with exonic NRXN1 deletions following referral for clinical microarray-based comparative genomic hybridization. To more firmly establish the full phen…	NRXN1	Gene	0.9907790422439575
16_deletion_duplication_16p11_22q11	Deletions at 2p16.3 involving exons of NRXN1 are associated with susceptibility for autism and schizophrenia, and similar deletions have been identified in individuals with developmental delay and dysmorphic features. We have identified 34 probands with exonic NRXN1 deletions following referral for clinical microarray-based comparative genomic hybridization. To more firmly establish the full phen…	NRXN1	Gene	0.9970993995666504
16_deletion_duplication_16p11_22q11	Deletions at 2p16.3 involving exons of NRXN1 are associated with susceptibility for autism and schizophrenia, and similar deletions have been identified in individuals with developmental delay and dysmorphic features. We have identified 34 probands with exonic NRXN1 deletions following referral for clinical microarray-based comparative genomic hybridization. To more firmly establish the full phen…	NRXN1	Gene	0.9959847927093506
16_deletion_duplication_16p11_22q11	Deletions at 2p16.3 involving exons of NRXN1 are associated with susceptibility for autism and schizophrenia, and similar deletions have been identified in individuals with developmental delay and dysmorphic features. We have identified 34 probands with exonic NRXN1 deletions following referral for clinical microarray-based comparative genomic hybridization. To more firmly establish the full phen…	NRXN1	Gene	0.997359
16_deletion_duplication_16p11_22q11	Deletions at 2p16.3 involving exons of NRXN1 are associated with susceptibility for autism and schizophrenia, and similar deletions have been identified in individuals with developmental delay and dysmorphic features. We have identified 34 probands with exonic NRXN1 deletions following referral for clinical microarray-based comparative genomic hybridization. To more firmly establish the full phen…	NRXN1	Gene	0.9981539845466614
16_deletion_duplication_16p11_22q11	Deletions at 2p16.3 involving exons of NRXN1 are associated with susceptibility for autism and schizophrenia, and similar deletions have been identified in individuals with developmental delay and dysmorphic features. We have identified 34 probands with exonic NRXN1 deletions following referral for clinical microarray-based comparative genomic hybridization. To more firmly establish the full phen…	NRXN1	Gene	0.9976345300674438
16_deletion_duplication_16p11_22q11	Deletions at 2p16.3 involving exons of NRXN1 are associated with susceptibility for autism and schizophrenia, and similar deletions have been identified in individuals with developmental delay and dysmorphic features. We have identified 34 probands with exonic NRXN1 deletions following referral for clinical microarray-based comparative genomic hybridization. To more firmly establish the full phen…	NRXN1	Gene	0.9980261921882629
16_deletion_duplication_16p11_22q11	Deletions at 2p16.3 involving exons of NRXN1 are associated with susceptibility for autism and schizophrenia, and similar deletions have been identified in individuals with developmental delay and dysmorphic features. We have identified 34 probands with exonic NRXN1 deletions following referral for clinical microarray-based comparative genomic hybridization. To more firmly establish the full phen…	NRXN1	Gene	0.9943282008171082
2_synaptic_genes_mice_protein	We report on a pedigree with a pair of brothers each with minor anomalies, developmental delay, and autistic-symptoms who share an unbalanced translocation (not detectable by karyotype). The unbalanced translocation involves a 7.1 Mb loss of the terminal portion of 10q, and a 4.2 Mb gain of 11q. One of the brothers also developed a cerebellar juvenile pilocytic astrocytoma. The father was found t…	IgLON	Gene	0.8918536901473999
2_synaptic_genes_mice_protein	We report on a pedigree with a pair of brothers each with minor anomalies, developmental delay, and autistic-symptoms who share an unbalanced translocation (not detectable by karyotype). The unbalanced translocation involves a 7.1 Mb loss of the terminal portion of 10q, and a 4.2 Mb gain of 11q. One of the brothers also developed a cerebellar juvenile pilocytic astrocytoma. The father was found t…	Neurotrimin	Gene	0.8497748970985413
2_synaptic_genes_mice_protein	We report on a pedigree with a pair of brothers each with minor anomalies, developmental delay, and autistic-symptoms who share an unbalanced translocation (not detectable by karyotype). The unbalanced translocation involves a 7.1 Mb loss of the terminal portion of 10q, and a 4.2 Mb gain of 11q. One of the brothers also developed a cerebellar juvenile pilocytic astrocytoma. The father was found t…	NTM	Gene	0.8043556809425354
2_synaptic_genes_mice_protein	We report on a pedigree with a pair of brothers each with minor anomalies, developmental delay, and autistic-symptoms who share an unbalanced translocation (not detectable by karyotype). The unbalanced translocation involves a 7.1 Mb loss of the terminal portion of 10q, and a 4.2 Mb gain of 11q. One of the brothers also developed a cerebellar juvenile pilocytic astrocytoma. The father was found t…	Opioid Binding Protein	Gene	0.6124067178794316
2_synaptic_genes_mice_protein	We report on a pedigree with a pair of brothers each with minor anomalies, developmental delay, and autistic-symptoms who share an unbalanced translocation (not detectable by karyotype). The unbalanced translocation involves a 7.1 Mb loss of the terminal portion of 10q, and a 4.2 Mb gain of 11q. One of the brothers also developed a cerebellar juvenile pilocytic astrocytoma. The father was found t…	OPCML	Gene	0.9492339491844177
2_synaptic_genes_mice_protein	We report on a pedigree with a pair of brothers each with minor anomalies, developmental delay, and autistic-symptoms who share an unbalanced translocation (not detectable by karyotype). The unbalanced translocation involves a 7.1 Mb loss of the terminal portion of 10q, and a 4.2 Mb gain of 11q. One of the brothers also developed a cerebellar juvenile pilocytic astrocytoma. The father was found t…	OPCML	Gene	0.962225
54_fxs_fragile_fmrp_fmr1	Fragile X Syndrome (FXS) and its associated disorders are caused by the expansion of the CGG repeat in the 5' untranslated region of the fragile X mental retardation 1 (FMR1) gene, with disease classification based on the number of CGG repeats. The mechanisms of repeat expansion are dependent on the presence of cis elements and the absence of trans factors both of which are not mutually exclusive…	fragile X mental retardation 1	Gene	0.6267049670219421
54_fxs_fragile_fmrp_fmr1	Fragile X Syndrome (FXS) and its associated disorders are caused by the expansion of the CGG repeat in the 5' untranslated region of the fragile X mental retardation 1 (FMR1) gene, with disease classification based on the number of CGG repeats. The mechanisms of repeat expansion are dependent on the presence of cis elements and the absence of trans factors both of which are not mutually exclusive…	FMR1	Gene	0.9545157551765442
24_cacna1c_mutation_mutations_timothy	Germline mutations in the cyclin-dependent kinase inhibitor, CDKN1B, have been described in patients with multiple endocrine neoplasia (MEN), a cancer predisposition syndrome with adult onset neoplasia and no additional phenotypes. Here, we describe the first human case of CDKN1B deficiency, which recapitulates features of the murine CDKN1B knockout mouse model, including gigantism and neurodevel…	cyclin-dependent kinase inhibitor	Gene	0.5394494334856669
24_cacna1c_mutation_mutations_timothy	Germline mutations in the cyclin-dependent kinase inhibitor, CDKN1B, have been described in patients with multiple endocrine neoplasia (MEN), a cancer predisposition syndrome with adult onset neoplasia and no additional phenotypes. Here, we describe the first human case of CDKN1B deficiency, which recapitulates features of the murine CDKN1B knockout mouse model, including gigantism and neurodevel…	CDKN1B	Gene	0.9688123464584351
24_cacna1c_mutation_mutations_timothy	Germline mutations in the cyclin-dependent kinase inhibitor, CDKN1B, have been described in patients with multiple endocrine neoplasia (MEN), a cancer predisposition syndrome with adult onset neoplasia and no additional phenotypes. Here, we describe the first human case of CDKN1B deficiency, which recapitulates features of the murine CDKN1B knockout mouse model, including gigantism and neurodevel…	CDKN1B	Gene	0.9953675270080566
24_cacna1c_mutation_mutations_timothy	Germline mutations in the cyclin-dependent kinase inhibitor, CDKN1B, have been described in patients with multiple endocrine neoplasia (MEN), a cancer predisposition syndrome with adult onset neoplasia and no additional phenotypes. Here, we describe the first human case of CDKN1B deficiency, which recapitulates features of the murine CDKN1B knockout mouse model, including gigantism and neurodevel…	CDKN1B	Gene	0.9792109131813049
24_cacna1c_mutation_mutations_timothy	Germline mutations in the cyclin-dependent kinase inhibitor, CDKN1B, have been described in patients with multiple endocrine neoplasia (MEN), a cancer predisposition syndrome with adult onset neoplasia and no additional phenotypes. Here, we describe the first human case of CDKN1B deficiency, which recapitulates features of the murine CDKN1B knockout mouse model, including gigantism and neurodevel…	CDKN1B	Gene	0.9927149415016174
24_cacna1c_mutation_mutations_timothy	Germline mutations in the cyclin-dependent kinase inhibitor, CDKN1B, have been described in patients with multiple endocrine neoplasia (MEN), a cancer predisposition syndrome with adult onset neoplasia and no additional phenotypes. Here, we describe the first human case of CDKN1B deficiency, which recapitulates features of the murine CDKN1B knockout mouse model, including gigantism and neurodevel…	CDKN1B	Gene	0.9780994057655334
24_cacna1c_mutation_mutations_timothy	Germline mutations in the cyclin-dependent kinase inhibitor, CDKN1B, have been described in patients with multiple endocrine neoplasia (MEN), a cancer predisposition syndrome with adult onset neoplasia and no additional phenotypes. Here, we describe the first human case of CDKN1B deficiency, which recapitulates features of the murine CDKN1B knockout mouse model, including gigantism and neurodevel…	CDKN1B	Gene	0.9711785316467285
24_cacna1c_mutation_mutations_timothy	Germline mutations in the cyclin-dependent kinase inhibitor, CDKN1B, have been described in patients with multiple endocrine neoplasia (MEN), a cancer predisposition syndrome with adult onset neoplasia and no additional phenotypes. Here, we describe the first human case of CDKN1B deficiency, which recapitulates features of the murine CDKN1B knockout mouse model, including gigantism and neurodevel…	CDKN1B	Gene	0.985128
24_cacna1c_mutation_mutations_timothy	Germline mutations in the cyclin-dependent kinase inhibitor, CDKN1B, have been described in patients with multiple endocrine neoplasia (MEN), a cancer predisposition syndrome with adult onset neoplasia and no additional phenotypes. Here, we describe the first human case of CDKN1B deficiency, which recapitulates features of the murine CDKN1B knockout mouse model, including gigantism and neurodevel…	CDKN1B	Gene	0.9849700927734375
16_deletion_duplication_16p11_22q11	In animal studies, brain-derived neurotrophic factor (BDNF) is an important regulator of central nervous system development and synaptic plasticity. WAGR (Wilms tumour, Aniridia, Genitourinary anomalies, and mental Retardation) syndrome is caused by 11p13 deletions of variable size near the BDNF locus and can serve as a model for studying human BDNF haploinsufficiency (+/-). We hypothesized that …	brain-derived neurotrophic factor	Gene	0.6895970702171326
16_deletion_duplication_16p11_22q11	In animal studies, brain-derived neurotrophic factor (BDNF) is an important regulator of central nervous system development and synaptic plasticity. WAGR (Wilms tumour, Aniridia, Genitourinary anomalies, and mental Retardation) syndrome is caused by 11p13 deletions of variable size near the BDNF locus and can serve as a model for studying human BDNF haploinsufficiency (+/-). We hypothesized that …	BDNF	Gene	0.9789667129516602
16_deletion_duplication_16p11_22q11	In animal studies, brain-derived neurotrophic factor (BDNF) is an important regulator of central nervous system development and synaptic plasticity. WAGR (Wilms tumour, Aniridia, Genitourinary anomalies, and mental Retardation) syndrome is caused by 11p13 deletions of variable size near the BDNF locus and can serve as a model for studying human BDNF haploinsufficiency (+/-). We hypothesized that …	BDNF	Gene	0.9501217603683472
16_deletion_duplication_16p11_22q11	In animal studies, brain-derived neurotrophic factor (BDNF) is an important regulator of central nervous system development and synaptic plasticity. WAGR (Wilms tumour, Aniridia, Genitourinary anomalies, and mental Retardation) syndrome is caused by 11p13 deletions of variable size near the BDNF locus and can serve as a model for studying human BDNF haploinsufficiency (+/-). We hypothesized that …	BDNF	Gene	0.9798484444618225
16_deletion_duplication_16p11_22q11	In animal studies, brain-derived neurotrophic factor (BDNF) is an important regulator of central nervous system development and synaptic plasticity. WAGR (Wilms tumour, Aniridia, Genitourinary anomalies, and mental Retardation) syndrome is caused by 11p13 deletions of variable size near the BDNF locus and can serve as a model for studying human BDNF haploinsufficiency (+/-). We hypothesized that …	BDNF	Gene	0.9927718043327332
16_deletion_duplication_16p11_22q11	In animal studies, brain-derived neurotrophic factor (BDNF) is an important regulator of central nervous system development and synaptic plasticity. WAGR (Wilms tumour, Aniridia, Genitourinary anomalies, and mental Retardation) syndrome is caused by 11p13 deletions of variable size near the BDNF locus and can serve as a model for studying human BDNF haploinsufficiency (+/-). We hypothesized that …	PAX6	Gene	0.9991703033447266
16_deletion_duplication_16p11_22q11	In animal studies, brain-derived neurotrophic factor (BDNF) is an important regulator of central nervous system development and synaptic plasticity. WAGR (Wilms tumour, Aniridia, Genitourinary anomalies, and mental Retardation) syndrome is caused by 11p13 deletions of variable size near the BDNF locus and can serve as a model for studying human BDNF haploinsufficiency (+/-). We hypothesized that …	BDNF	Gene	0.9923380017280579
16_deletion_duplication_16p11_22q11	In animal studies, brain-derived neurotrophic factor (BDNF) is an important regulator of central nervous system development and synaptic plasticity. WAGR (Wilms tumour, Aniridia, Genitourinary anomalies, and mental Retardation) syndrome is caused by 11p13 deletions of variable size near the BDNF locus and can serve as a model for studying human BDNF haploinsufficiency (+/-). We hypothesized that …	BDNF	Gene	0.9833553433418274
16_deletion_duplication_16p11_22q11	In animal studies, brain-derived neurotrophic factor (BDNF) is an important regulator of central nervous system development and synaptic plasticity. WAGR (Wilms tumour, Aniridia, Genitourinary anomalies, and mental Retardation) syndrome is caused by 11p13 deletions of variable size near the BDNF locus and can serve as a model for studying human BDNF haploinsufficiency (+/-). We hypothesized that …	BDNF	Gene	0.9769636988639832
16_deletion_duplication_16p11_22q11	In animal studies, brain-derived neurotrophic factor (BDNF) is an important regulator of central nervous system development and synaptic plasticity. WAGR (Wilms tumour, Aniridia, Genitourinary anomalies, and mental Retardation) syndrome is caused by 11p13 deletions of variable size near the BDNF locus and can serve as a model for studying human BDNF haploinsufficiency (+/-). We hypothesized that …	BDNF	Gene	0.9951218962669373
16_deletion_duplication_16p11_22q11	In animal studies, brain-derived neurotrophic factor (BDNF) is an important regulator of central nervous system development and synaptic plasticity. WAGR (Wilms tumour, Aniridia, Genitourinary anomalies, and mental Retardation) syndrome is caused by 11p13 deletions of variable size near the BDNF locus and can serve as a model for studying human BDNF haploinsufficiency (+/-). We hypothesized that …	BDNF	Gene	0.990563
16_deletion_duplication_16p11_22q11	In animal studies, brain-derived neurotrophic factor (BDNF) is an important regulator of central nervous system development and synaptic plasticity. WAGR (Wilms tumour, Aniridia, Genitourinary anomalies, and mental Retardation) syndrome is caused by 11p13 deletions of variable size near the BDNF locus and can serve as a model for studying human BDNF haploinsufficiency (+/-). We hypothesized that …	BDNF	Gene	0.9872415065765381
16_deletion_duplication_16p11_22q11	In animal studies, brain-derived neurotrophic factor (BDNF) is an important regulator of central nervous system development and synaptic plasticity. WAGR (Wilms tumour, Aniridia, Genitourinary anomalies, and mental Retardation) syndrome is caused by 11p13 deletions of variable size near the BDNF locus and can serve as a model for studying human BDNF haploinsufficiency (+/-). We hypothesized that …	BDNF	Gene	0.9918131828308105
24_cacna1c_mutation_mutations_timothy	Timothy syndrome (TS) is a rare long-QT syndrome caused by CACNA1C mutations G406R in exon 8A (TS1) and G402S/G406R in exon 8 (TS2). Management of TS is a challenge and prognosis is poor. This study aimed to explore the inheritance pattern and mechanism of an INa blocker, mexiletine, to improve clinical manifestations in TS.A 2-year-old Chinese girl with a typical TS1 phenotype underwent candidat…	CACNA1C	Gene	0.9869383573532104
24_cacna1c_mutation_mutations_timothy	Timothy syndrome (TS) is a rare long-QT syndrome caused by CACNA1C mutations G406R in exon 8A (TS1) and G402S/G406R in exon 8 (TS2). Management of TS is a challenge and prognosis is poor. This study aimed to explore the inheritance pattern and mechanism of an INa blocker, mexiletine, to improve clinical manifestations in TS.A 2-year-old Chinese girl with a typical TS1 phenotype underwent candidat…	CACNA1C	Gene	0.9811288118362427
15_genes_variants_mutations_novo	The purpose of the present study was to discover the extent to which distinct DSM disorders share large, highly recurrent copy number variants (CNVs) as susceptibility factors. We also sought to identify gene mechanisms common to groups of diagnoses and/or specific to a given diagnosis based on associations with CNVs.Systematic review of 820 PubMed articles on autism spectrum disorder (ASD), inte…	actin	Gene	0.6735572814941406
15_genes_variants_mutations_novo	We carried out analyses with the goal of identifying rare variants in exome sequence data that contribute to disease risk for a complex trait. We analyzed a large, 47-member, multigenerational pedigree with 11 cases of autism spectrum disorder, using genotypes from 3 technologies representing increasing resolution: a multiallelic linkage marker panel, a dense diallelic marker panel, and variants …	MYH9	Gene	0.9778215885162354
41_variants_sequencing_exome_variant	Existence of a discrete new X-linked intellectual disability (XLID) syndrome due to KIAA2022 deficiency was questioned by disruption of KIAA2022 by an X-chromosome pericentric inversion in a XLID family we reported in 2004. Three additional families with likely pathogenic KIAA2022 mutations were discovered within the frame of systematic parallel sequencing of familial cases of XLID or in the cont…	KIAA2022	Gene	0.989983
41_variants_sequencing_exome_variant	Existence of a discrete new X-linked intellectual disability (XLID) syndrome due to KIAA2022 deficiency was questioned by disruption of KIAA2022 by an X-chromosome pericentric inversion in a XLID family we reported in 2004. Three additional families with likely pathogenic KIAA2022 mutations were discovered within the frame of systematic parallel sequencing of familial cases of XLID or in the cont…	KIAA2022	Gene	0.9943933486938477
41_variants_sequencing_exome_variant	Existence of a discrete new X-linked intellectual disability (XLID) syndrome due to KIAA2022 deficiency was questioned by disruption of KIAA2022 by an X-chromosome pericentric inversion in a XLID family we reported in 2004. Three additional families with likely pathogenic KIAA2022 mutations were discovered within the frame of systematic parallel sequencing of familial cases of XLID or in the cont…	KIAA2022	Gene	0.9891092777252197
41_variants_sequencing_exome_variant	Existence of a discrete new X-linked intellectual disability (XLID) syndrome due to KIAA2022 deficiency was questioned by disruption of KIAA2022 by an X-chromosome pericentric inversion in a XLID family we reported in 2004. Three additional families with likely pathogenic KIAA2022 mutations were discovered within the frame of systematic parallel sequencing of familial cases of XLID or in the cont…	KIAA2022	Gene	0.6605086922645569
41_variants_sequencing_exome_variant	Existence of a discrete new X-linked intellectual disability (XLID) syndrome due to KIAA2022 deficiency was questioned by disruption of KIAA2022 by an X-chromosome pericentric inversion in a XLID family we reported in 2004. Three additional families with likely pathogenic KIAA2022 mutations were discovered within the frame of systematic parallel sequencing of familial cases of XLID or in the cont…	KIAA2022	Gene	0.9937779903411865
41_variants_sequencing_exome_variant	Existence of a discrete new X-linked intellectual disability (XLID) syndrome due to KIAA2022 deficiency was questioned by disruption of KIAA2022 by an X-chromosome pericentric inversion in a XLID family we reported in 2004. Three additional families with likely pathogenic KIAA2022 mutations were discovered within the frame of systematic parallel sequencing of familial cases of XLID or in the cont…	KIAA2022	Gene	0.9972407817840576
41_variants_sequencing_exome_variant	Existence of a discrete new X-linked intellectual disability (XLID) syndrome due to KIAA2022 deficiency was questioned by disruption of KIAA2022 by an X-chromosome pericentric inversion in a XLID family we reported in 2004. Three additional families with likely pathogenic KIAA2022 mutations were discovered within the frame of systematic parallel sequencing of familial cases of XLID or in the cont…	KIAA2022	Gene	0.9995170831680298
41_variants_sequencing_exome_variant	Existence of a discrete new X-linked intellectual disability (XLID) syndrome due to KIAA2022 deficiency was questioned by disruption of KIAA2022 by an X-chromosome pericentric inversion in a XLID family we reported in 2004. Three additional families with likely pathogenic KIAA2022 mutations were discovered within the frame of systematic parallel sequencing of familial cases of XLID or in the cont…	KIAA2022	Gene	0.9941985607147217
41_variants_sequencing_exome_variant	Existence of a discrete new X-linked intellectual disability (XLID) syndrome due to KIAA2022 deficiency was questioned by disruption of KIAA2022 by an X-chromosome pericentric inversion in a XLID family we reported in 2004. Three additional families with likely pathogenic KIAA2022 mutations were discovered within the frame of systematic parallel sequencing of familial cases of XLID or in the cont…	KIAA2022	Gene	0.9969643950462341
41_variants_sequencing_exome_variant	Existence of a discrete new X-linked intellectual disability (XLID) syndrome due to KIAA2022 deficiency was questioned by disruption of KIAA2022 by an X-chromosome pericentric inversion in a XLID family we reported in 2004. Three additional families with likely pathogenic KIAA2022 mutations were discovered within the frame of systematic parallel sequencing of familial cases of XLID or in the cont…	KIAA2022	Gene	0.9960843324661255
2_synaptic_genes_mice_protein	Autism spectrum disorder (ASD) is one of the most common neurodevelopmental disorders and is thought to be closely associated with genetic factors. It is noteworthy that many ASD-associated genes reported by genome-wide association studies encode proteins related to synaptic formation, transmission, and plasticity. Therefore, it is essential to elucidate the relationship between deficiencies in t…	CAPS2	Gene	0.9834169745445251
2_synaptic_genes_mice_protein	Autism spectrum disorder (ASD) is one of the most common neurodevelopmental disorders and is thought to be closely associated with genetic factors. It is noteworthy that many ASD-associated genes reported by genome-wide association studies encode proteins related to synaptic formation, transmission, and plasticity. Therefore, it is essential to elucidate the relationship between deficiencies in t…	CADPS2	Gene	0.9875011444091797
57_snps_association_genetic_polymorphisms	Autism is a neurodevelopmental disorder with a high estimated heritability. ATP2B2, located on human chromosome 3p25.3, encodes the plasma membrane calcium-transporting ATPase 2 which extrudes Ca(2+) from cytosol into extracellular space. Recent studies reported association between ATP2B2 and autism in samples from Autism Genetic Resource Exchange (AGRE) and Italy. In this study, we investigated …	ATP2B2	Gene	0.9896016716957092
57_snps_association_genetic_polymorphisms	Autism is a neurodevelopmental disorder with a high estimated heritability. ATP2B2, located on human chromosome 3p25.3, encodes the plasma membrane calcium-transporting ATPase 2 which extrudes Ca(2+) from cytosol into extracellular space. Recent studies reported association between ATP2B2 and autism in samples from Autism Genetic Resource Exchange (AGRE) and Italy. In this study, we investigated …	calcium-transporting ATPase 2	Gene	0.7457807064056396
57_snps_association_genetic_polymorphisms	Autism is a neurodevelopmental disorder with a high estimated heritability. ATP2B2, located on human chromosome 3p25.3, encodes the plasma membrane calcium-transporting ATPase 2 which extrudes Ca(2+) from cytosol into extracellular space. Recent studies reported association between ATP2B2 and autism in samples from Autism Genetic Resource Exchange (AGRE) and Italy. In this study, we investigated …	ATP2B2	Gene	0.9967455863952637
57_snps_association_genetic_polymorphisms	Autism is a neurodevelopmental disorder with a high estimated heritability. ATP2B2, located on human chromosome 3p25.3, encodes the plasma membrane calcium-transporting ATPase 2 which extrudes Ca(2+) from cytosol into extracellular space. Recent studies reported association between ATP2B2 and autism in samples from Autism Genetic Resource Exchange (AGRE) and Italy. In this study, we investigated …	ATP2B2	Gene	0.9973795413970947
57_snps_association_genetic_polymorphisms	Autism is a neurodevelopmental disorder with a high estimated heritability. ATP2B2, located on human chromosome 3p25.3, encodes the plasma membrane calcium-transporting ATPase 2 which extrudes Ca(2+) from cytosol into extracellular space. Recent studies reported association between ATP2B2 and autism in samples from Autism Genetic Resource Exchange (AGRE) and Italy. In this study, we investigated …	ATP2B2	Gene	0.9966997504234314
57_snps_association_genetic_polymorphisms	Autism is a neurodevelopmental disorder with a high estimated heritability. ATP2B2, located on human chromosome 3p25.3, encodes the plasma membrane calcium-transporting ATPase 2 which extrudes Ca(2+) from cytosol into extracellular space. Recent studies reported association between ATP2B2 and autism in samples from Autism Genetic Resource Exchange (AGRE) and Italy. In this study, we investigated …	ATP2B2	Gene	0.9959415793418884
17_methylation_epigenetic_dna_genes	Serotoninergic dysfunction leads to neurodevelopmental abnormalities and behavioral impairments. Platelet hyperserotoninemia is reported as the best identified endophenotype for autism spectrum disorders. Therefore, in the present study we investigate the association of TPH2, the rate limiting enzyme in 5-HT biosynthesis and ITGB3, a serotonin quantitative trait locus with ASD in the Indian popul…	TPH2	Gene	0.9891777038574219
17_methylation_epigenetic_dna_genes	Serotoninergic dysfunction leads to neurodevelopmental abnormalities and behavioral impairments. Platelet hyperserotoninemia is reported as the best identified endophenotype for autism spectrum disorders. Therefore, in the present study we investigate the association of TPH2, the rate limiting enzyme in 5-HT biosynthesis and ITGB3, a serotonin quantitative trait locus with ASD in the Indian popul…	ITGB3	Gene	0.9797315001487732
17_methylation_epigenetic_dna_genes	Serotoninergic dysfunction leads to neurodevelopmental abnormalities and behavioral impairments. Platelet hyperserotoninemia is reported as the best identified endophenotype for autism spectrum disorders. Therefore, in the present study we investigate the association of TPH2, the rate limiting enzyme in 5-HT biosynthesis and ITGB3, a serotonin quantitative trait locus with ASD in the Indian popul…	ITGB3	Gene	0.9939883947372437
17_methylation_epigenetic_dna_genes	Serotoninergic dysfunction leads to neurodevelopmental abnormalities and behavioral impairments. Platelet hyperserotoninemia is reported as the best identified endophenotype for autism spectrum disorders. Therefore, in the present study we investigate the association of TPH2, the rate limiting enzyme in 5-HT biosynthesis and ITGB3, a serotonin quantitative trait locus with ASD in the Indian popul…	TPH2	Gene	0.9881542921066284
17_methylation_epigenetic_dna_genes	Serotoninergic dysfunction leads to neurodevelopmental abnormalities and behavioral impairments. Platelet hyperserotoninemia is reported as the best identified endophenotype for autism spectrum disorders. Therefore, in the present study we investigate the association of TPH2, the rate limiting enzyme in 5-HT biosynthesis and ITGB3, a serotonin quantitative trait locus with ASD in the Indian popul…	ITGB3	Gene	0.9918768405914307
17_methylation_epigenetic_dna_genes	Serotoninergic dysfunction leads to neurodevelopmental abnormalities and behavioral impairments. Platelet hyperserotoninemia is reported as the best identified endophenotype for autism spectrum disorders. Therefore, in the present study we investigate the association of TPH2, the rate limiting enzyme in 5-HT biosynthesis and ITGB3, a serotonin quantitative trait locus with ASD in the Indian popul…	TPH2	Gene	0.9904944896697998
17_methylation_epigenetic_dna_genes	Serotoninergic dysfunction leads to neurodevelopmental abnormalities and behavioral impairments. Platelet hyperserotoninemia is reported as the best identified endophenotype for autism spectrum disorders. Therefore, in the present study we investigate the association of TPH2, the rate limiting enzyme in 5-HT biosynthesis and ITGB3, a serotonin quantitative trait locus with ASD in the Indian popul…	ITGB3	Gene	0.9924115538597107
17_methylation_epigenetic_dna_genes	Serotoninergic dysfunction leads to neurodevelopmental abnormalities and behavioral impairments. Platelet hyperserotoninemia is reported as the best identified endophenotype for autism spectrum disorders. Therefore, in the present study we investigate the association of TPH2, the rate limiting enzyme in 5-HT biosynthesis and ITGB3, a serotonin quantitative trait locus with ASD in the Indian popul…	TPH2	Gene	0.9835997819900513
17_methylation_epigenetic_dna_genes	Serotoninergic dysfunction leads to neurodevelopmental abnormalities and behavioral impairments. Platelet hyperserotoninemia is reported as the best identified endophenotype for autism spectrum disorders. Therefore, in the present study we investigate the association of TPH2, the rate limiting enzyme in 5-HT biosynthesis and ITGB3, a serotonin quantitative trait locus with ASD in the Indian popul…	ITGB3	Gene	0.9870699644088745
17_methylation_epigenetic_dna_genes	Serotoninergic dysfunction leads to neurodevelopmental abnormalities and behavioral impairments. Platelet hyperserotoninemia is reported as the best identified endophenotype for autism spectrum disorders. Therefore, in the present study we investigate the association of TPH2, the rate limiting enzyme in 5-HT biosynthesis and ITGB3, a serotonin quantitative trait locus with ASD in the Indian popul…	TPH2	Gene	0.9887141585350037
57_snps_association_genetic_polymorphisms	Autism spectrum disorder (ASD) is a neurodevelopmental syndrome associated with impairments of reciprocal communication and cognitive function. Associations between single-nucleotide polymorphisms (SNPs) and ASD were analysed by logistic regression. Polymorphisms in fibronectin type III domain-containing 3A (FNDC3A) exhibited significant associations in genotype and diplotype analyses. We conclud…	fibronectin type III domain-containing 3A	Gene	0.6514184594154357
57_snps_association_genetic_polymorphisms	Autism spectrum disorder (ASD) is a neurodevelopmental syndrome associated with impairments of reciprocal communication and cognitive function. Associations between single-nucleotide polymorphisms (SNPs) and ASD were analysed by logistic regression. Polymorphisms in fibronectin type III domain-containing 3A (FNDC3A) exhibited significant associations in genotype and diplotype analyses. We conclud…	FNDC3A	Gene	0.9911367893218994
57_snps_association_genetic_polymorphisms	Autism spectrum disorder (ASD) is a neurodevelopmental syndrome associated with impairments of reciprocal communication and cognitive function. Associations between single-nucleotide polymorphisms (SNPs) and ASD were analysed by logistic regression. Polymorphisms in fibronectin type III domain-containing 3A (FNDC3A) exhibited significant associations in genotype and diplotype analyses. We conclud…	FNDC3A	Gene	0.9943252205848694
2_synaptic_genes_mice_protein	Actin-based remodelling underlies spine structural changes occurring during synaptic plasticity, the process that constantly reshapes the circuitry of the adult brain in response to external stimuli, leading to learning and memory formation. A positive correlation exists between spine shape and synaptic strength and, consistently, abnormalities in spine number and morphology have been described i…	actin-regulating	Gene	0.5737701654434204
2_synaptic_genes_mice_protein	Actin-based remodelling underlies spine structural changes occurring during synaptic plasticity, the process that constantly reshapes the circuitry of the adult brain in response to external stimuli, leading to learning and memory formation. A positive correlation exists between spine shape and synaptic strength and, consistently, abnormalities in spine number and morphology have been described i…	Eps8	Gene	0.9788548350334167
2_synaptic_genes_mice_protein	Actin-based remodelling underlies spine structural changes occurring during synaptic plasticity, the process that constantly reshapes the circuitry of the adult brain in response to external stimuli, leading to learning and memory formation. A positive correlation exists between spine shape and synaptic strength and, consistently, abnormalities in spine number and morphology have been described i…	Eps8	Gene	0.9931875467300415
2_synaptic_genes_mice_protein	Actin-based remodelling underlies spine structural changes occurring during synaptic plasticity, the process that constantly reshapes the circuitry of the adult brain in response to external stimuli, leading to learning and memory formation. A positive correlation exists between spine shape and synaptic strength and, consistently, abnormalities in spine number and morphology have been described i…	Eps8	Gene	0.9851173162460327
2_synaptic_genes_mice_protein	Actin-based remodelling underlies spine structural changes occurring during synaptic plasticity, the process that constantly reshapes the circuitry of the adult brain in response to external stimuli, leading to learning and memory formation. A positive correlation exists between spine shape and synaptic strength and, consistently, abnormalities in spine number and morphology have been described i…	Eps8	Gene	0.9548684358596802
24_cacna1c_mutation_mutations_timothy	The presence of 2 distinct populations of somatic or germline cells within a single individual harboring different genotypes is termed mosaicism. Recent reports suggest that parental mosaicism is involved in the heritability of type 1 Timothy syndrome (TS1), an extremely rare and life-threatening multisystem disorder characterized by severe QT interval prolongation, syndactyly, and several other …	TS1-causative	Gene	0.5897938013076782
120_pten_phts_macrocephaly_mutations	Unlike some other childhood neurodevelopmental disorders, no diagnostic biochemical marker has been identified in all individuals with an autism spectrum disorder (ASD). This deficit likely results from genetic heterogeneity among the population. Therefore, we evaluated a subset of individuals with ASDs, specifically, individuals with or without macrocephaly in the presence or absence of PTEN mut…	PTEN	Gene	0.986922
120_pten_phts_macrocephaly_mutations	Unlike some other childhood neurodevelopmental disorders, no diagnostic biochemical marker has been identified in all individuals with an autism spectrum disorder (ASD). This deficit likely results from genetic heterogeneity among the population. Therefore, we evaluated a subset of individuals with ASDs, specifically, individuals with or without macrocephaly in the presence or absence of PTEN mut…	PTEN	Gene	0.9882087707519531
120_pten_phts_macrocephaly_mutations	Unlike some other childhood neurodevelopmental disorders, no diagnostic biochemical marker has been identified in all individuals with an autism spectrum disorder (ASD). This deficit likely results from genetic heterogeneity among the population. Therefore, we evaluated a subset of individuals with ASDs, specifically, individuals with or without macrocephaly in the presence or absence of PTEN mut…	PTEN	Gene	0.9806298613548279
120_pten_phts_macrocephaly_mutations	Unlike some other childhood neurodevelopmental disorders, no diagnostic biochemical marker has been identified in all individuals with an autism spectrum disorder (ASD). This deficit likely results from genetic heterogeneity among the population. Therefore, we evaluated a subset of individuals with ASDs, specifically, individuals with or without macrocephaly in the presence or absence of PTEN mut…	PTEN	Gene	0.9916903972625732
120_pten_phts_macrocephaly_mutations	Unlike some other childhood neurodevelopmental disorders, no diagnostic biochemical marker has been identified in all individuals with an autism spectrum disorder (ASD). This deficit likely results from genetic heterogeneity among the population. Therefore, we evaluated a subset of individuals with ASDs, specifically, individuals with or without macrocephaly in the presence or absence of PTEN mut…	PTEN	Gene	0.9882996082305908
120_pten_phts_macrocephaly_mutations	Unlike some other childhood neurodevelopmental disorders, no diagnostic biochemical marker has been identified in all individuals with an autism spectrum disorder (ASD). This deficit likely results from genetic heterogeneity among the population. Therefore, we evaluated a subset of individuals with ASDs, specifically, individuals with or without macrocephaly in the presence or absence of PTEN mut…	PTEN	Gene	0.9856700301170349
120_pten_phts_macrocephaly_mutations	Unlike some other childhood neurodevelopmental disorders, no diagnostic biochemical marker has been identified in all individuals with an autism spectrum disorder (ASD). This deficit likely results from genetic heterogeneity among the population. Therefore, we evaluated a subset of individuals with ASDs, specifically, individuals with or without macrocephaly in the presence or absence of PTEN mut…	PTEN	Gene	0.989566
120_pten_phts_macrocephaly_mutations	Unlike some other childhood neurodevelopmental disorders, no diagnostic biochemical marker has been identified in all individuals with an autism spectrum disorder (ASD). This deficit likely results from genetic heterogeneity among the population. Therefore, we evaluated a subset of individuals with ASDs, specifically, individuals with or without macrocephaly in the presence or absence of PTEN mut…	PTEN	Gene	0.9830083847045898
15_genes_variants_mutations_novo	Recent studies have shown that certain copy number variations (CNV) are associated with a wide range of neurodevelopmental disorders, including autism spectrum disorders (ASD), bipolar disorder and intellectual disabilities. Implicated regions and genes have comprised a variety of post synaptic complex proteins and neurotransmitter receptors, including gamma-amino butyric acid A (GABAA). Clusters…	GABAA receptor	Gene	0.5891160368919373
50_gut_microbiota_metabolic_diseases	Adenylosuccinate lyase (ADSL) is a homotetrameric enzyme involved in the de novo purine biosynthesis pathway and purine nucleotide cycle. Missense mutations in the protein lead to ADSL deficiency, an inborn error of purine metabolism characterized by neurological and physiological symptoms. ADSL deficiency is biochemically diagnosed by elevated levels of succinylaminoimidazolecarboxamide riboside…	Adenylosuccinate lyase	Gene	0.7511598169803619
50_gut_microbiota_metabolic_diseases	Adenylosuccinate lyase (ADSL) is a homotetrameric enzyme involved in the de novo purine biosynthesis pathway and purine nucleotide cycle. Missense mutations in the protein lead to ADSL deficiency, an inborn error of purine metabolism characterized by neurological and physiological symptoms. ADSL deficiency is biochemically diagnosed by elevated levels of succinylaminoimidazolecarboxamide riboside…	ADSL	Gene	0.9964008331298828
50_gut_microbiota_metabolic_diseases	Adenylosuccinate lyase (ADSL) is a homotetrameric enzyme involved in the de novo purine biosynthesis pathway and purine nucleotide cycle. Missense mutations in the protein lead to ADSL deficiency, an inborn error of purine metabolism characterized by neurological and physiological symptoms. ADSL deficiency is biochemically diagnosed by elevated levels of succinylaminoimidazolecarboxamide riboside…	ADSL	Gene	0.9628902077674866
50_gut_microbiota_metabolic_diseases	Adenylosuccinate lyase (ADSL) is a homotetrameric enzyme involved in the de novo purine biosynthesis pathway and purine nucleotide cycle. Missense mutations in the protein lead to ADSL deficiency, an inborn error of purine metabolism characterized by neurological and physiological symptoms. ADSL deficiency is biochemically diagnosed by elevated levels of succinylaminoimidazolecarboxamide riboside…	ADSL	Gene	0.9801627397537231
50_gut_microbiota_metabolic_diseases	Adenylosuccinate lyase (ADSL) is a homotetrameric enzyme involved in the de novo purine biosynthesis pathway and purine nucleotide cycle. Missense mutations in the protein lead to ADSL deficiency, an inborn error of purine metabolism characterized by neurological and physiological symptoms. ADSL deficiency is biochemically diagnosed by elevated levels of succinylaminoimidazolecarboxamide riboside…	ADSL	Gene	0.9693129658699036
15_genes_variants_mutations_novo	The genetic basis of complex neurological disorders involving language are poorly understood, partly due to the multiple additive genetic risk factors that are thought to be responsible. Furthermore, these conditions are often syndromic in that they have a range of endophenotypes that may be associated with the disorder and that may be present in different combinations in patients. However, the e…	CNTNAP2	Gene	0.9886589646339417
15_genes_variants_mutations_novo	The genetic basis of complex neurological disorders involving language are poorly understood, partly due to the multiple additive genetic risk factors that are thought to be responsible. Furthermore, these conditions are often syndromic in that they have a range of endophenotypes that may be associated with the disorder and that may be present in different combinations in patients. However, the e…	CNTNAP2	Gene	0.9950106143951416
15_genes_variants_mutations_novo	The genetic basis of complex neurological disorders involving language are poorly understood, partly due to the multiple additive genetic risk factors that are thought to be responsible. Furthermore, these conditions are often syndromic in that they have a range of endophenotypes that may be associated with the disorder and that may be present in different combinations in patients. However, the e…	CNTNAP2	Gene	0.9959016442298889
15_genes_variants_mutations_novo	The genetic basis of complex neurological disorders involving language are poorly understood, partly due to the multiple additive genetic risk factors that are thought to be responsible. Furthermore, these conditions are often syndromic in that they have a range of endophenotypes that may be associated with the disorder and that may be present in different combinations in patients. However, the e…	CNTNAP2	Gene	0.9919130802154541
17_methylation_epigenetic_dna_genes	Autism spectrum disorders are severe neurodevelopmental disorders with a strong genetic component. The potential role of the serotoninergic system in the development of autistic disorder has been based on the observation of hyperserotoninemia in autistic subjects and the results of drug treatment studies. Multiple molecules involved in serotonin metabolism and neurotransmission have been studied;…	SLC6A4	Gene	0.985751
17_methylation_epigenetic_dna_genes	Autism spectrum disorders are severe neurodevelopmental disorders with a strong genetic component. The potential role of the serotoninergic system in the development of autistic disorder has been based on the observation of hyperserotoninemia in autistic subjects and the results of drug treatment studies. Multiple molecules involved in serotonin metabolism and neurotransmission have been studied;…	HTR2A	Gene	0.9926112294197083
17_methylation_epigenetic_dna_genes	Autism spectrum disorders are severe neurodevelopmental disorders with a strong genetic component. The potential role of the serotoninergic system in the development of autistic disorder has been based on the observation of hyperserotoninemia in autistic subjects and the results of drug treatment studies. Multiple molecules involved in serotonin metabolism and neurotransmission have been studied;…	ITGB3	Gene	0.9915820956230164
17_methylation_epigenetic_dna_genes	Autism spectrum disorders are severe neurodevelopmental disorders with a strong genetic component. The potential role of the serotoninergic system in the development of autistic disorder has been based on the observation of hyperserotoninemia in autistic subjects and the results of drug treatment studies. Multiple molecules involved in serotonin metabolism and neurotransmission have been studied;…	SLC6A4	Gene	0.9892311692237854
17_methylation_epigenetic_dna_genes	Autism spectrum disorders are severe neurodevelopmental disorders with a strong genetic component. The potential role of the serotoninergic system in the development of autistic disorder has been based on the observation of hyperserotoninemia in autistic subjects and the results of drug treatment studies. Multiple molecules involved in serotonin metabolism and neurotransmission have been studied;…	HTR2A	Gene	0.9943888783454895
17_methylation_epigenetic_dna_genes	Autism spectrum disorders are severe neurodevelopmental disorders with a strong genetic component. The potential role of the serotoninergic system in the development of autistic disorder has been based on the observation of hyperserotoninemia in autistic subjects and the results of drug treatment studies. Multiple molecules involved in serotonin metabolism and neurotransmission have been studied;…	ITGB3	Gene	0.9950044751167297
17_methylation_epigenetic_dna_genes	Autism spectrum disorders are severe neurodevelopmental disorders with a strong genetic component. The potential role of the serotoninergic system in the development of autistic disorder has been based on the observation of hyperserotoninemia in autistic subjects and the results of drug treatment studies. Multiple molecules involved in serotonin metabolism and neurotransmission have been studied;…	SLC6A4	Gene	0.9978860020637512
17_methylation_epigenetic_dna_genes	Autism spectrum disorders are severe neurodevelopmental disorders with a strong genetic component. The potential role of the serotoninergic system in the development of autistic disorder has been based on the observation of hyperserotoninemia in autistic subjects and the results of drug treatment studies. Multiple molecules involved in serotonin metabolism and neurotransmission have been studied;…	ITGB3	Gene	0.9976181387901306
17_methylation_epigenetic_dna_genes	Autism spectrum disorders are severe neurodevelopmental disorders with a strong genetic component. The potential role of the serotoninergic system in the development of autistic disorder has been based on the observation of hyperserotoninemia in autistic subjects and the results of drug treatment studies. Multiple molecules involved in serotonin metabolism and neurotransmission have been studied;…	HTR2A	Gene	0.9964147806167603
17_methylation_epigenetic_dna_genes	Autism spectrum disorders are severe neurodevelopmental disorders with a strong genetic component. The potential role of the serotoninergic system in the development of autistic disorder has been based on the observation of hyperserotoninemia in autistic subjects and the results of drug treatment studies. Multiple molecules involved in serotonin metabolism and neurotransmission have been studied;…	SLC6A4	Gene	0.9918707609176636
17_methylation_epigenetic_dna_genes	Autism spectrum disorders are severe neurodevelopmental disorders with a strong genetic component. The potential role of the serotoninergic system in the development of autistic disorder has been based on the observation of hyperserotoninemia in autistic subjects and the results of drug treatment studies. Multiple molecules involved in serotonin metabolism and neurotransmission have been studied;…	HTR2A	Gene	0.9881475567817688
17_methylation_epigenetic_dna_genes	Autism spectrum disorders are severe neurodevelopmental disorders with a strong genetic component. The potential role of the serotoninergic system in the development of autistic disorder has been based on the observation of hyperserotoninemia in autistic subjects and the results of drug treatment studies. Multiple molecules involved in serotonin metabolism and neurotransmission have been studied;…	SLC6A4	Gene	0.990045
17_methylation_epigenetic_dna_genes	Autism spectrum disorders are severe neurodevelopmental disorders with a strong genetic component. The potential role of the serotoninergic system in the development of autistic disorder has been based on the observation of hyperserotoninemia in autistic subjects and the results of drug treatment studies. Multiple molecules involved in serotonin metabolism and neurotransmission have been studied;…	SLC6A4	Gene	0.9946030974388123
17_methylation_epigenetic_dna_genes	Autism spectrum disorders are severe neurodevelopmental disorders with a strong genetic component. The potential role of the serotoninergic system in the development of autistic disorder has been based on the observation of hyperserotoninemia in autistic subjects and the results of drug treatment studies. Multiple molecules involved in serotonin metabolism and neurotransmission have been studied;…	HTR2A	Gene	0.9696815013885498
54_fxs_fragile_fmrp_fmr1	Fragile X syndrome, the leading inherited cause of mental retardation and autism spectrum disorders worldwide, is caused by a tandem repeat expansion in the FMR1 (fragile X mental retardation 1) gene. It presents with a distinct behavioral phenotype which overlaps significantly with that of autism. Emerging evidence suggests that tandem repeat polymorphisms (TRPs) might also play a key role in mo…	FMR1	Gene	0.8867412805557251
54_fxs_fragile_fmrp_fmr1	Fragile X syndrome, the leading inherited cause of mental retardation and autism spectrum disorders worldwide, is caused by a tandem repeat expansion in the FMR1 (fragile X mental retardation 1) gene. It presents with a distinct behavioral phenotype which overlaps significantly with that of autism. Emerging evidence suggests that tandem repeat polymorphisms (TRPs) might also play a key role in mo…	fragile X mental retardation 1	Gene	0.6118667364120484
2_synaptic_genes_mice_protein	Precise regulation of neurite growth and differentiation determines accurate formation of synaptic connections, whose disruptions are frequently associated with neurological disorders. Dedicator of cytokinesis 4 (Dock4), an atypical guanine nucleotide exchange factor for Rac1, is found to be associated with neuropsychiatric diseases, including autism and schizophrenia. Nonetheless, the neuronal f…	Dedicator of cytokinesis 4	Gene	0.7657611966133118
2_synaptic_genes_mice_protein	Precise regulation of neurite growth and differentiation determines accurate formation of synaptic connections, whose disruptions are frequently associated with neurological disorders. Dedicator of cytokinesis 4 (Dock4), an atypical guanine nucleotide exchange factor for Rac1, is found to be associated with neuropsychiatric diseases, including autism and schizophrenia. Nonetheless, the neuronal f…	Dock4	Gene	0.9823856949806213
2_synaptic_genes_mice_protein	Precise regulation of neurite growth and differentiation determines accurate formation of synaptic connections, whose disruptions are frequently associated with neurological disorders. Dedicator of cytokinesis 4 (Dock4), an atypical guanine nucleotide exchange factor for Rac1, is found to be associated with neuropsychiatric diseases, including autism and schizophrenia. Nonetheless, the neuronal f…	Rac1	Gene	0.7724671959877014
2_synaptic_genes_mice_protein	Precise regulation of neurite growth and differentiation determines accurate formation of synaptic connections, whose disruptions are frequently associated with neurological disorders. Dedicator of cytokinesis 4 (Dock4), an atypical guanine nucleotide exchange factor for Rac1, is found to be associated with neuropsychiatric diseases, including autism and schizophrenia. Nonetheless, the neuronal f…	Dock4	Gene	0.9928821325302124
2_synaptic_genes_mice_protein	Precise regulation of neurite growth and differentiation determines accurate formation of synaptic connections, whose disruptions are frequently associated with neurological disorders. Dedicator of cytokinesis 4 (Dock4), an atypical guanine nucleotide exchange factor for Rac1, is found to be associated with neuropsychiatric diseases, including autism and schizophrenia. Nonetheless, the neuronal f…	Dock4	Gene	0.9894953370094299
2_synaptic_genes_mice_protein	Precise regulation of neurite growth and differentiation determines accurate formation of synaptic connections, whose disruptions are frequently associated with neurological disorders. Dedicator of cytokinesis 4 (Dock4), an atypical guanine nucleotide exchange factor for Rac1, is found to be associated with neuropsychiatric diseases, including autism and schizophrenia. Nonetheless, the neuronal f…	Rac1	Gene	0.9552416205406189
2_synaptic_genes_mice_protein	Precise regulation of neurite growth and differentiation determines accurate formation of synaptic connections, whose disruptions are frequently associated with neurological disorders. Dedicator of cytokinesis 4 (Dock4), an atypical guanine nucleotide exchange factor for Rac1, is found to be associated with neuropsychiatric diseases, including autism and schizophrenia. Nonetheless, the neuronal f…	actin-enriched	Gene	0.6644502282142639
2_synaptic_genes_mice_protein	Precise regulation of neurite growth and differentiation determines accurate formation of synaptic connections, whose disruptions are frequently associated with neurological disorders. Dedicator of cytokinesis 4 (Dock4), an atypical guanine nucleotide exchange factor for Rac1, is found to be associated with neuropsychiatric diseases, including autism and schizophrenia. Nonetheless, the neuronal f…	Dock4	Gene	0.9941127896308899
2_synaptic_genes_mice_protein	Precise regulation of neurite growth and differentiation determines accurate formation of synaptic connections, whose disruptions are frequently associated with neurological disorders. Dedicator of cytokinesis 4 (Dock4), an atypical guanine nucleotide exchange factor for Rac1, is found to be associated with neuropsychiatric diseases, including autism and schizophrenia. Nonetheless, the neuronal f…	Dock4	Gene	0.9856559038162231
2_synaptic_genes_mice_protein	Precise regulation of neurite growth and differentiation determines accurate formation of synaptic connections, whose disruptions are frequently associated with neurological disorders. Dedicator of cytokinesis 4 (Dock4), an atypical guanine nucleotide exchange factor for Rac1, is found to be associated with neuropsychiatric diseases, including autism and schizophrenia. Nonetheless, the neuronal f…	GEF	Gene	0.5635966062545776
2_synaptic_genes_mice_protein	Precise regulation of neurite growth and differentiation determines accurate formation of synaptic connections, whose disruptions are frequently associated with neurological disorders. Dedicator of cytokinesis 4 (Dock4), an atypical guanine nucleotide exchange factor for Rac1, is found to be associated with neuropsychiatric diseases, including autism and schizophrenia. Nonetheless, the neuronal f…	Dock4	Gene	0.9930713772773743
2_synaptic_genes_mice_protein	Precise regulation of neurite growth and differentiation determines accurate formation of synaptic connections, whose disruptions are frequently associated with neurological disorders. Dedicator of cytokinesis 4 (Dock4), an atypical guanine nucleotide exchange factor for Rac1, is found to be associated with neuropsychiatric diseases, including autism and schizophrenia. Nonetheless, the neuronal f…	Dock4	Gene	0.9885026216506958
54_fxs_fragile_fmrp_fmr1	Fragile X Syndrome (FXS) is considered the most common form of inherited intellectual disability. It is caused by reductions in the expression level or function of a single protein, the Fragile X Mental Retardation Protein (FMRP), a translational regulator which binds to approximately 4% of brain messenger RNAs. Accumulating evidence suggests that FXS is a complex disorder of cognition, involving…	Fragile X Mental Retardation Protein	Gene	0.6498112916946411
54_fxs_fragile_fmrp_fmr1	Fragile X Syndrome (FXS) is considered the most common form of inherited intellectual disability. It is caused by reductions in the expression level or function of a single protein, the Fragile X Mental Retardation Protein (FMRP), a translational regulator which binds to approximately 4% of brain messenger RNAs. Accumulating evidence suggests that FXS is a complex disorder of cognition, involving…	FMRP	Gene	0.9130476713180542
16_deletion_duplication_16p11_22q11	Autism Spectrum Disorders (ASD) are complex neurodevelopmental conditions characterized by delays in social interactions and communication as well as displays of restrictive/repetitive interests. DNA copy number variants have been identified as a genomic susceptibility factor in ASDs and imply significant genetic heterogeneity. We report a 7-year-old female with ADOS-G and ADI-R confirmed autisti…	desmocollin	Gene	0.7798954248428345
16_deletion_duplication_16p11_22q11	Autism Spectrum Disorders (ASD) are complex neurodevelopmental conditions characterized by delays in social interactions and communication as well as displays of restrictive/repetitive interests. DNA copy number variants have been identified as a genomic susceptibility factor in ASDs and imply significant genetic heterogeneity. We report a 7-year-old female with ADOS-G and ADI-R confirmed autisti…	desmoglein	Gene	0.4819487929344177
16_deletion_duplication_16p11_22q11	Autism Spectrum Disorders (ASD) are complex neurodevelopmental conditions characterized by delays in social interactions and communication as well as displays of restrictive/repetitive interests. DNA copy number variants have been identified as a genomic susceptibility factor in ASDs and imply significant genetic heterogeneity. We report a 7-year-old female with ADOS-G and ADI-R confirmed autisti…	trafficking protein particle complex 8	Gene	0.6844384431838989
16_deletion_duplication_16p11_22q11	Autism Spectrum Disorders (ASD) are complex neurodevelopmental conditions characterized by delays in social interactions and communication as well as displays of restrictive/repetitive interests. DNA copy number variants have been identified as a genomic susceptibility factor in ASDs and imply significant genetic heterogeneity. We report a 7-year-old female with ADOS-G and ADI-R confirmed autisti…	dystrobrevin-alpha	Gene	0.8752346038818359
2_synaptic_genes_mice_protein	Compulsive behavior is a debilitating clinical feature of many forms of neuropsychiatric disease, including Tourette syndrome, obsessive-compulsive spectrum disorders, eating disorders, and autism. Although several studies link striatal dysfunction to compulsivity, the pathophysiology remains poorly understood. Here, we show that both constitutive and induced genetic deletion of the gene encoding…	melanocortin 4 receptor	Gene	0.664825
2_synaptic_genes_mice_protein	Compulsive behavior is a debilitating clinical feature of many forms of neuropsychiatric disease, including Tourette syndrome, obsessive-compulsive spectrum disorders, eating disorders, and autism. Although several studies link striatal dysfunction to compulsivity, the pathophysiology remains poorly understood. Here, we show that both constitutive and induced genetic deletion of the gene encoding…	MC4R	Gene	0.870047
2_synaptic_genes_mice_protein	Compulsive behavior is a debilitating clinical feature of many forms of neuropsychiatric disease, including Tourette syndrome, obsessive-compulsive spectrum disorders, eating disorders, and autism. Although several studies link striatal dysfunction to compulsivity, the pathophysiology remains poorly understood. Here, we show that both constitutive and induced genetic deletion of the gene encoding…	MC4R	Gene	0.877815
2_synaptic_genes_mice_protein	Compulsive behavior is a debilitating clinical feature of many forms of neuropsychiatric disease, including Tourette syndrome, obsessive-compulsive spectrum disorders, eating disorders, and autism. Although several studies link striatal dysfunction to compulsivity, the pathophysiology remains poorly understood. Here, we show that both constitutive and induced genetic deletion of the gene encoding…	synapse-associated protein 90	Gene	0.6638793547948202
2_synaptic_genes_mice_protein	Compulsive behavior is a debilitating clinical feature of many forms of neuropsychiatric disease, including Tourette syndrome, obsessive-compulsive spectrum disorders, eating disorders, and autism. Although several studies link striatal dysfunction to compulsivity, the pathophysiology remains poorly understood. Here, we show that both constitutive and induced genetic deletion of the gene encoding…	postsynaptic density protein 95-associated protein 3	Gene	0.6737143099308014
2_synaptic_genes_mice_protein	Compulsive behavior is a debilitating clinical feature of many forms of neuropsychiatric disease, including Tourette syndrome, obsessive-compulsive spectrum disorders, eating disorders, and autism. Although several studies link striatal dysfunction to compulsivity, the pathophysiology remains poorly understood. Here, we show that both constitutive and induced genetic deletion of the gene encoding…	SAPAP3	Gene	0.9739233255386353
2_synaptic_genes_mice_protein	Compulsive behavior is a debilitating clinical feature of many forms of neuropsychiatric disease, including Tourette syndrome, obsessive-compulsive spectrum disorders, eating disorders, and autism. Although several studies link striatal dysfunction to compulsivity, the pathophysiology remains poorly understood. Here, we show that both constitutive and induced genetic deletion of the gene encoding…	SAPAP3	Gene	0.9881072640419006
2_synaptic_genes_mice_protein	Compulsive behavior is a debilitating clinical feature of many forms of neuropsychiatric disease, including Tourette syndrome, obsessive-compulsive spectrum disorders, eating disorders, and autism. Although several studies link striatal dysfunction to compulsivity, the pathophysiology remains poorly understood. Here, we show that both constitutive and induced genetic deletion of the gene encoding…	MC4R-null	Gene	0.9877480268478394
16_deletion_duplication_16p11_22q11	Williams Beuren syndrome (WBS) is a multisystemic disorder caused by a hemizygous deletion of 1.5 Mb on chromosome 7q11.23 spanning 28 genes. A few patients with larger and smaller WBS deletion have been reported. They show clinical features that vary between isolated SVAS to the full spectrum of WBS phenotype, associated with epilepsy or autism spectrum behavior. Here we describe four patients w…	Huntingtin-interacting protein 1	Gene	0.6796059906482697
16_deletion_duplication_16p11_22q11	Williams Beuren syndrome (WBS) is a multisystemic disorder caused by a hemizygous deletion of 1.5 Mb on chromosome 7q11.23 spanning 28 genes. A few patients with larger and smaller WBS deletion have been reported. They show clinical features that vary between isolated SVAS to the full spectrum of WBS phenotype, associated with epilepsy or autism spectrum behavior. Here we describe four patients w…	HIP1	Gene	0.919692
16_deletion_duplication_16p11_22q11	Williams Beuren syndrome (WBS) is a multisystemic disorder caused by a hemizygous deletion of 1.5 Mb on chromosome 7q11.23 spanning 28 genes. A few patients with larger and smaller WBS deletion have been reported. They show clinical features that vary between isolated SVAS to the full spectrum of WBS phenotype, associated with epilepsy or autism spectrum behavior. Here we describe four patients w…	tyrosine 3-monooxygenase	Gene	0.6133810989558697
16_deletion_duplication_16p11_22q11	Williams Beuren syndrome (WBS) is a multisystemic disorder caused by a hemizygous deletion of 1.5 Mb on chromosome 7q11.23 spanning 28 genes. A few patients with larger and smaller WBS deletion have been reported. They show clinical features that vary between isolated SVAS to the full spectrum of WBS phenotype, associated with epilepsy or autism spectrum behavior. Here we describe four patients w…	YWHAG	Gene	0.9744179248809814
16_deletion_duplication_16p11_22q11	Williams Beuren syndrome (WBS) is a multisystemic disorder caused by a hemizygous deletion of 1.5 Mb on chromosome 7q11.23 spanning 28 genes. A few patients with larger and smaller WBS deletion have been reported. They show clinical features that vary between isolated SVAS to the full spectrum of WBS phenotype, associated with epilepsy or autism spectrum behavior. Here we describe four patients w…	BAZ1B	Gene	0.9663079380989075
16_deletion_duplication_16p11_22q11	Williams Beuren syndrome (WBS) is a multisystemic disorder caused by a hemizygous deletion of 1.5 Mb on chromosome 7q11.23 spanning 28 genes. A few patients with larger and smaller WBS deletion have been reported. They show clinical features that vary between isolated SVAS to the full spectrum of WBS phenotype, associated with epilepsy or autism spectrum behavior. Here we describe four patients w…	FZD9	Gene	0.9912931323051453
16_deletion_duplication_16p11_22q11	Williams Beuren syndrome (WBS) is a multisystemic disorder caused by a hemizygous deletion of 1.5 Mb on chromosome 7q11.23 spanning 28 genes. A few patients with larger and smaller WBS deletion have been reported. They show clinical features that vary between isolated SVAS to the full spectrum of WBS phenotype, associated with epilepsy or autism spectrum behavior. Here we describe four patients w…	HIP1	Gene	0.9587587714195251
16_deletion_duplication_16p11_22q11	Williams Beuren syndrome (WBS) is a multisystemic disorder caused by a hemizygous deletion of 1.5 Mb on chromosome 7q11.23 spanning 28 genes. A few patients with larger and smaller WBS deletion have been reported. They show clinical features that vary between isolated SVAS to the full spectrum of WBS phenotype, associated with epilepsy or autism spectrum behavior. Here we describe four patients w…	YWHAG	Gene	0.9910693168640137
16_deletion_duplication_16p11_22q11	Williams Beuren syndrome (WBS) is a multisystemic disorder caused by a hemizygous deletion of 1.5 Mb on chromosome 7q11.23 spanning 28 genes. A few patients with larger and smaller WBS deletion have been reported. They show clinical features that vary between isolated SVAS to the full spectrum of WBS phenotype, associated with epilepsy or autism spectrum behavior. Here we describe four patients w…	BAZ1B	Gene	0.9753307104110718
16_deletion_duplication_16p11_22q11	Williams Beuren syndrome (WBS) is a multisystemic disorder caused by a hemizygous deletion of 1.5 Mb on chromosome 7q11.23 spanning 28 genes. A few patients with larger and smaller WBS deletion have been reported. They show clinical features that vary between isolated SVAS to the full spectrum of WBS phenotype, associated with epilepsy or autism spectrum behavior. Here we describe four patients w…	FZD9	Gene	0.987575
2_synaptic_genes_mice_protein	Interleukin-1 receptor accessory protein-like 1 (IL1RAPL1) is associated with X-linked mental retardation and autism spectrum disorder. We found that IL1RAPL1 regulates synapse formation of cortical neurons. To investigate how IL1RAPL1 controls synapse formation, we here screened IL1RAPL1-interacting proteins by affinity chromatography and mass spectroscopy. IL1RAPL1 interacted with Mcf2-like (Mc…	Interleukin-1 receptor accessory protein-like 1	Gene	0.6898529887199402
2_synaptic_genes_mice_protein	Interleukin-1 receptor accessory protein-like 1 (IL1RAPL1) is associated with X-linked mental retardation and autism spectrum disorder. We found that IL1RAPL1 regulates synapse formation of cortical neurons. To investigate how IL1RAPL1 controls synapse formation, we here screened IL1RAPL1-interacting proteins by affinity chromatography and mass spectroscopy. IL1RAPL1 interacted with Mcf2-like (Mc…	IL1RAPL1	Gene	0.9853523373603821
2_synaptic_genes_mice_protein	Interleukin-1 receptor accessory protein-like 1 (IL1RAPL1) is associated with X-linked mental retardation and autism spectrum disorder. We found that IL1RAPL1 regulates synapse formation of cortical neurons. To investigate how IL1RAPL1 controls synapse formation, we here screened IL1RAPL1-interacting proteins by affinity chromatography and mass spectroscopy. IL1RAPL1 interacted with Mcf2-like (Mc…	IL1RAPL1	Gene	0.9911937117576599
2_synaptic_genes_mice_protein	Interleukin-1 receptor accessory protein-like 1 (IL1RAPL1) is associated with X-linked mental retardation and autism spectrum disorder. We found that IL1RAPL1 regulates synapse formation of cortical neurons. To investigate how IL1RAPL1 controls synapse formation, we here screened IL1RAPL1-interacting proteins by affinity chromatography and mass spectroscopy. IL1RAPL1 interacted with Mcf2-like (Mc…	IL1RAPL1	Gene	0.9936475157737732
2_synaptic_genes_mice_protein	Interleukin-1 receptor accessory protein-like 1 (IL1RAPL1) is associated with X-linked mental retardation and autism spectrum disorder. We found that IL1RAPL1 regulates synapse formation of cortical neurons. To investigate how IL1RAPL1 controls synapse formation, we here screened IL1RAPL1-interacting proteins by affinity chromatography and mass spectroscopy. IL1RAPL1 interacted with Mcf2-like (Mc…	IL1RAPL1-interacting	Gene	0.8915262818336487
2_synaptic_genes_mice_protein	Interleukin-1 receptor accessory protein-like 1 (IL1RAPL1) is associated with X-linked mental retardation and autism spectrum disorder. We found that IL1RAPL1 regulates synapse formation of cortical neurons. To investigate how IL1RAPL1 controls synapse formation, we here screened IL1RAPL1-interacting proteins by affinity chromatography and mass spectroscopy. IL1RAPL1 interacted with Mcf2-like (Mc…	IL1RAPL1	Gene	0.9904058575630188
2_synaptic_genes_mice_protein	Interleukin-1 receptor accessory protein-like 1 (IL1RAPL1) is associated with X-linked mental retardation and autism spectrum disorder. We found that IL1RAPL1 regulates synapse formation of cortical neurons. To investigate how IL1RAPL1 controls synapse formation, we here screened IL1RAPL1-interacting proteins by affinity chromatography and mass spectroscopy. IL1RAPL1 interacted with Mcf2-like (Mc…	Mcf2-like	Gene	0.956062
2_synaptic_genes_mice_protein	Interleukin-1 receptor accessory protein-like 1 (IL1RAPL1) is associated with X-linked mental retardation and autism spectrum disorder. We found that IL1RAPL1 regulates synapse formation of cortical neurons. To investigate how IL1RAPL1 controls synapse formation, we here screened IL1RAPL1-interacting proteins by affinity chromatography and mass spectroscopy. IL1RAPL1 interacted with Mcf2-like (Mc…	Mcf2l	Gene	0.9900374412536621
2_synaptic_genes_mice_protein	Interleukin-1 receptor accessory protein-like 1 (IL1RAPL1) is associated with X-linked mental retardation and autism spectrum disorder. We found that IL1RAPL1 regulates synapse formation of cortical neurons. To investigate how IL1RAPL1 controls synapse formation, we here screened IL1RAPL1-interacting proteins by affinity chromatography and mass spectroscopy. IL1RAPL1 interacted with Mcf2-like (Mc…	Rho guanine nucleotide exchange factor	Gene	0.6342687487602234
2_synaptic_genes_mice_protein	Interleukin-1 receptor accessory protein-like 1 (IL1RAPL1) is associated with X-linked mental retardation and autism spectrum disorder. We found that IL1RAPL1 regulates synapse formation of cortical neurons. To investigate how IL1RAPL1 controls synapse formation, we here screened IL1RAPL1-interacting proteins by affinity chromatography and mass spectroscopy. IL1RAPL1 interacted with Mcf2-like (Mc…	Toll	Gene	0.6245081424713135
2_synaptic_genes_mice_protein	Interleukin-1 receptor accessory protein-like 1 (IL1RAPL1) is associated with X-linked mental retardation and autism spectrum disorder. We found that IL1RAPL1 regulates synapse formation of cortical neurons. To investigate how IL1RAPL1 controls synapse formation, we here screened IL1RAPL1-interacting proteins by affinity chromatography and mass spectroscopy. IL1RAPL1 interacted with Mcf2-like (Mc…	Mcf2l	Gene	0.9888213872909546
2_synaptic_genes_mice_protein	Interleukin-1 receptor accessory protein-like 1 (IL1RAPL1) is associated with X-linked mental retardation and autism spectrum disorder. We found that IL1RAPL1 regulates synapse formation of cortical neurons. To investigate how IL1RAPL1 controls synapse formation, we here screened IL1RAPL1-interacting proteins by affinity chromatography and mass spectroscopy. IL1RAPL1 interacted with Mcf2-like (Mc…	Rho-associated protein kinase	Gene	0.7473801175753275
2_synaptic_genes_mice_protein	Interleukin-1 receptor accessory protein-like 1 (IL1RAPL1) is associated with X-linked mental retardation and autism spectrum disorder. We found that IL1RAPL1 regulates synapse formation of cortical neurons. To investigate how IL1RAPL1 controls synapse formation, we here screened IL1RAPL1-interacting proteins by affinity chromatography and mass spectroscopy. IL1RAPL1 interacted with Mcf2-like (Mc…	ROCK	Gene	0.9539936184883118
2_synaptic_genes_mice_protein	Interleukin-1 receptor accessory protein-like 1 (IL1RAPL1) is associated with X-linked mental retardation and autism spectrum disorder. We found that IL1RAPL1 regulates synapse formation of cortical neurons. To investigate how IL1RAPL1 controls synapse formation, we here screened IL1RAPL1-interacting proteins by affinity chromatography and mass spectroscopy. IL1RAPL1 interacted with Mcf2-like (Mc…	RhoA	Gene	0.9313995242118835
2_synaptic_genes_mice_protein	Interleukin-1 receptor accessory protein-like 1 (IL1RAPL1) is associated with X-linked mental retardation and autism spectrum disorder. We found that IL1RAPL1 regulates synapse formation of cortical neurons. To investigate how IL1RAPL1 controls synapse formation, we here screened IL1RAPL1-interacting proteins by affinity chromatography and mass spectroscopy. IL1RAPL1 interacted with Mcf2-like (Mc…	IL1RAPL1-induced	Gene	0.9681504964828491
2_synaptic_genes_mice_protein	Interleukin-1 receptor accessory protein-like 1 (IL1RAPL1) is associated with X-linked mental retardation and autism spectrum disorder. We found that IL1RAPL1 regulates synapse formation of cortical neurons. To investigate how IL1RAPL1 controls synapse formation, we here screened IL1RAPL1-interacting proteins by affinity chromatography and mass spectroscopy. IL1RAPL1 interacted with Mcf2-like (Mc…	IL1RAPL1	Gene	0.9948053956031799
2_synaptic_genes_mice_protein	Interleukin-1 receptor accessory protein-like 1 (IL1RAPL1) is associated with X-linked mental retardation and autism spectrum disorder. We found that IL1RAPL1 regulates synapse formation of cortical neurons. To investigate how IL1RAPL1 controls synapse formation, we here screened IL1RAPL1-interacting proteins by affinity chromatography and mass spectroscopy. IL1RAPL1 interacted with Mcf2-like (Mc…	AMPA receptor	Gene	0.6071516275405884
2_synaptic_genes_mice_protein	Interleukin-1 receptor accessory protein-like 1 (IL1RAPL1) is associated with X-linked mental retardation and autism spectrum disorder. We found that IL1RAPL1 regulates synapse formation of cortical neurons. To investigate how IL1RAPL1 controls synapse formation, we here screened IL1RAPL1-interacting proteins by affinity chromatography and mass spectroscopy. IL1RAPL1 interacted with Mcf2-like (Mc…	GluA1-containing AMPA receptors	Gene	0.5821611881256104
2_synaptic_genes_mice_protein	Interleukin-1 receptor accessory protein-like 1 (IL1RAPL1) is associated with X-linked mental retardation and autism spectrum disorder. We found that IL1RAPL1 regulates synapse formation of cortical neurons. To investigate how IL1RAPL1 controls synapse formation, we here screened IL1RAPL1-interacting proteins by affinity chromatography and mass spectroscopy. IL1RAPL1 interacted with Mcf2-like (Mc…	AMPA receptors	Gene	0.6637702584266663
2_synaptic_genes_mice_protein	Interleukin-1 receptor accessory protein-like 1 (IL1RAPL1) is associated with X-linked mental retardation and autism spectrum disorder. We found that IL1RAPL1 regulates synapse formation of cortical neurons. To investigate how IL1RAPL1 controls synapse formation, we here screened IL1RAPL1-interacting proteins by affinity chromatography and mass spectroscopy. IL1RAPL1 interacted with Mcf2-like (Mc…	GluA2	Gene	0.828846
2_synaptic_genes_mice_protein	Interleukin-1 receptor accessory protein-like 1 (IL1RAPL1) is associated with X-linked mental retardation and autism spectrum disorder. We found that IL1RAPL1 regulates synapse formation of cortical neurons. To investigate how IL1RAPL1 controls synapse formation, we here screened IL1RAPL1-interacting proteins by affinity chromatography and mass spectroscopy. IL1RAPL1 interacted with Mcf2-like (Mc…	Mcf2l	Gene	0.9853975772857666
2_synaptic_genes_mice_protein	Interleukin-1 receptor accessory protein-like 1 (IL1RAPL1) is associated with X-linked mental retardation and autism spectrum disorder. We found that IL1RAPL1 regulates synapse formation of cortical neurons. To investigate how IL1RAPL1 controls synapse formation, we here screened IL1RAPL1-interacting proteins by affinity chromatography and mass spectroscopy. IL1RAPL1 interacted with Mcf2-like (Mc…	ROCK	Gene	0.947986
2_synaptic_genes_mice_protein	Interleukin-1 receptor accessory protein-like 1 (IL1RAPL1) is associated with X-linked mental retardation and autism spectrum disorder. We found that IL1RAPL1 regulates synapse formation of cortical neurons. To investigate how IL1RAPL1 controls synapse formation, we here screened IL1RAPL1-interacting proteins by affinity chromatography and mass spectroscopy. IL1RAPL1 interacted with Mcf2-like (Mc…	IL1RAPL1-induced	Gene	0.8750928640365601
2_synaptic_genes_mice_protein	Interleukin-1 receptor accessory protein-like 1 (IL1RAPL1) is associated with X-linked mental retardation and autism spectrum disorder. We found that IL1RAPL1 regulates synapse formation of cortical neurons. To investigate how IL1RAPL1 controls synapse formation, we here screened IL1RAPL1-interacting proteins by affinity chromatography and mass spectroscopy. IL1RAPL1 interacted with Mcf2-like (Mc…	Mcf2l-RhoA-ROCK	Gene	0.9686766266822815
2_synaptic_genes_mice_protein	Interleukin-1 receptor accessory protein-like 1 (IL1RAPL1) is associated with X-linked mental retardation and autism spectrum disorder. We found that IL1RAPL1 regulates synapse formation of cortical neurons. To investigate how IL1RAPL1 controls synapse formation, we here screened IL1RAPL1-interacting proteins by affinity chromatography and mass spectroscopy. IL1RAPL1 interacted with Mcf2-like (Mc…	IL1RAPL1-dependent	Gene	0.9694004654884338
2_synaptic_genes_mice_protein	Loss-of-function mutations in UPF3B result in variable clinical presentations including intellectual disability (ID, syndromic and non-syndromic), autism, childhood onset schizophrenia and attention deficit hyperactivity disorder. UPF3B is a core member of the nonsense-mediated mRNA decay (NMD) pathway that functions to rapidly degrade transcripts with premature termination codons (PTCs). Traditi…	UPF3B	Gene	0.9782727956771851
2_synaptic_genes_mice_protein	Loss-of-function mutations in UPF3B result in variable clinical presentations including intellectual disability (ID, syndromic and non-syndromic), autism, childhood onset schizophrenia and attention deficit hyperactivity disorder. UPF3B is a core member of the nonsense-mediated mRNA decay (NMD) pathway that functions to rapidly degrade transcripts with premature termination codons (PTCs). Traditi…	UPF3B	Gene	0.9753818511962891
2_synaptic_genes_mice_protein	Loss-of-function mutations in UPF3B result in variable clinical presentations including intellectual disability (ID, syndromic and non-syndromic), autism, childhood onset schizophrenia and attention deficit hyperactivity disorder. UPF3B is a core member of the nonsense-mediated mRNA decay (NMD) pathway that functions to rapidly degrade transcripts with premature termination codons (PTCs). Traditi…	Upf3b	Gene	0.8912262916564941
2_synaptic_genes_mice_protein	Loss-of-function mutations in UPF3B result in variable clinical presentations including intellectual disability (ID, syndromic and non-syndromic), autism, childhood onset schizophrenia and attention deficit hyperactivity disorder. UPF3B is a core member of the nonsense-mediated mRNA decay (NMD) pathway that functions to rapidly degrade transcripts with premature termination codons (PTCs). Traditi…	Upf3b-dependent	Gene	0.9794817566871643
2_synaptic_genes_mice_protein	Loss-of-function mutations in UPF3B result in variable clinical presentations including intellectual disability (ID, syndromic and non-syndromic), autism, childhood onset schizophrenia and attention deficit hyperactivity disorder. UPF3B is a core member of the nonsense-mediated mRNA decay (NMD) pathway that functions to rapidly degrade transcripts with premature termination codons (PTCs). Traditi…	Upf3b-NMD	Gene	0.9320930242538452
2_synaptic_genes_mice_protein	Loss-of-function mutations in UPF3B result in variable clinical presentations including intellectual disability (ID, syndromic and non-syndromic), autism, childhood onset schizophrenia and attention deficit hyperactivity disorder. UPF3B is a core member of the nonsense-mediated mRNA decay (NMD) pathway that functions to rapidly degrade transcripts with premature termination codons (PTCs). Traditi…	Upf3b	Gene	0.9351931810379028
2_synaptic_genes_mice_protein	Loss-of-function mutations in UPF3B result in variable clinical presentations including intellectual disability (ID, syndromic and non-syndromic), autism, childhood onset schizophrenia and attention deficit hyperactivity disorder. UPF3B is a core member of the nonsense-mediated mRNA decay (NMD) pathway that functions to rapidly degrade transcripts with premature termination codons (PTCs). Traditi…	Upf3b	Gene	0.9526857137680054
2_synaptic_genes_mice_protein	Loss-of-function mutations in UPF3B result in variable clinical presentations including intellectual disability (ID, syndromic and non-syndromic), autism, childhood onset schizophrenia and attention deficit hyperactivity disorder. UPF3B is a core member of the nonsense-mediated mRNA decay (NMD) pathway that functions to rapidly degrade transcripts with premature termination codons (PTCs). Traditi…	Upf3a	Gene	0.9889844655990601
2_synaptic_genes_mice_protein	Loss-of-function mutations in UPF3B result in variable clinical presentations including intellectual disability (ID, syndromic and non-syndromic), autism, childhood onset schizophrenia and attention deficit hyperactivity disorder. UPF3B is a core member of the nonsense-mediated mRNA decay (NMD) pathway that functions to rapidly degrade transcripts with premature termination codons (PTCs). Traditi…	Stau1	Gene	0.9919440746307373
2_synaptic_genes_mice_protein	Loss-of-function mutations in UPF3B result in variable clinical presentations including intellectual disability (ID, syndromic and non-syndromic), autism, childhood onset schizophrenia and attention deficit hyperactivity disorder. UPF3B is a core member of the nonsense-mediated mRNA decay (NMD) pathway that functions to rapidly degrade transcripts with premature termination codons (PTCs). Traditi…	Staufen1-mediated	Gene	0.9140326976776123
2_synaptic_genes_mice_protein	Loss-of-function mutations in UPF3B result in variable clinical presentations including intellectual disability (ID, syndromic and non-syndromic), autism, childhood onset schizophrenia and attention deficit hyperactivity disorder. UPF3B is a core member of the nonsense-mediated mRNA decay (NMD) pathway that functions to rapidly degrade transcripts with premature termination codons (PTCs). Traditi…	Upf3b-NMD	Gene	0.9639600515365601
2_synaptic_genes_mice_protein	Loss-of-function mutations in UPF3B result in variable clinical presentations including intellectual disability (ID, syndromic and non-syndromic), autism, childhood onset schizophrenia and attention deficit hyperactivity disorder. UPF3B is a core member of the nonsense-mediated mRNA decay (NMD) pathway that functions to rapidly degrade transcripts with premature termination codons (PTCs). Traditi…	Upf3b-NMD	Gene	0.9842664003372192
2_synaptic_genes_mice_protein	Loss-of-function mutations in UPF3B result in variable clinical presentations including intellectual disability (ID, syndromic and non-syndromic), autism, childhood onset schizophrenia and attention deficit hyperactivity disorder. UPF3B is a core member of the nonsense-mediated mRNA decay (NMD) pathway that functions to rapidly degrade transcripts with premature termination codons (PTCs). Traditi…	Upf3b-NMD	Gene	0.9688193798065186
2_synaptic_genes_mice_protein	Loss-of-function mutations in UPF3B result in variable clinical presentations including intellectual disability (ID, syndromic and non-syndromic), autism, childhood onset schizophrenia and attention deficit hyperactivity disorder. UPF3B is a core member of the nonsense-mediated mRNA decay (NMD) pathway that functions to rapidly degrade transcripts with premature termination codons (PTCs). Traditi…	UPF3B	Gene	0.9784478545188904
2_synaptic_genes_mice_protein	Loss-of-function mutations in UPF3B result in variable clinical presentations including intellectual disability (ID, syndromic and non-syndromic), autism, childhood onset schizophrenia and attention deficit hyperactivity disorder. UPF3B is a core member of the nonsense-mediated mRNA decay (NMD) pathway that functions to rapidly degrade transcripts with premature termination codons (PTCs). Traditi…	UPF3B	Gene	0.9733279943466187
2_synaptic_genes_mice_protein	Loss-of-function mutations in UPF3B result in variable clinical presentations including intellectual disability (ID, syndromic and non-syndromic), autism, childhood onset schizophrenia and attention deficit hyperactivity disorder. UPF3B is a core member of the nonsense-mediated mRNA decay (NMD) pathway that functions to rapidly degrade transcripts with premature termination codons (PTCs). Traditi…	UPF3B	Gene	0.9821281433105469
16_deletion_duplication_16p11_22q11	We observed a patient with a Saethre-Chotzen-like phenotype with severe neurological features. Saethre-Chotzen syndrome (acrocephalosyndactyly type III; SCS; OMIM #101400) is an autosomal dominant craniosynostosis syndrome characterized by craniofacial and mild limb abnormalities. The phenotypic features of chromosomal microdeletions involving the 7p21.1, where the twist homolog 1 gene (TWIST1) r…	twist homolog 1	Gene	0.6073781748612722
16_deletion_duplication_16p11_22q11	We observed a patient with a Saethre-Chotzen-like phenotype with severe neurological features. Saethre-Chotzen syndrome (acrocephalosyndactyly type III; SCS; OMIM #101400) is an autosomal dominant craniosynostosis syndrome characterized by craniofacial and mild limb abnormalities. The phenotypic features of chromosomal microdeletions involving the 7p21.1, where the twist homolog 1 gene (TWIST1) r…	TWIST1	Gene	0.9717665910720825
2_synaptic_genes_mice_protein	This week, Science Signaling highlights research that uses computational and cell biology approaches to uncover the molecular mechanisms underlying diseases of the central nervous system. In particular, research featured explores the neuronal response to stress due to excess excitatory stimuli, multiple roles for presenilin in Alzheimer's disease, and mechanisms through which autism may arise. In…	presenilin	Gene	0.741473
2_synaptic_genes_mice_protein	Autism is a common and heritable neuropsychiatric disorder that can be categorized into two types: syndromic and nonsyndromic, the former of which are associated with other neurological disorders or syndromes. Molecular and functional links between syndromic and nonsyndromic autism genes were lacking until studies aimed at understanding the role of trans-synaptic adhesion molecule neuroligin, whi…	neuroligin	Gene	0.5869583487510681
2_synaptic_genes_mice_protein	Autism is a complex, heterogeneous neurobehavioral disorder with many causes and varying degrees of severity. Some genetic implications related to autism may involve gene-regulatory processes such as alternative splicing. Here, we assess the feasibility of profiling exon-level gene expression in autism using the Affymetrix Human exon 1.0 ST array.We examined lymphoblastoid cell line-derived RNAs …	CYFIP1	Gene	0.987736
15_genes_variants_mutations_novo	Autism Spectrum Disorder (ASD) demonstrates high heritability and familial clustering, yet the genetic causes remain only partially understood as a result of extensive clinical and genomic heterogeneity. Whole-genome sequencing (WGS) shows promise as a tool for identifying ASD risk genes as well as unreported mutations in known loci, but an assessment of its full utility in an ASD group has not b…	CAPRIN1	Gene	0.9746549129486084
15_genes_variants_mutations_novo	Autism Spectrum Disorder (ASD) demonstrates high heritability and familial clustering, yet the genetic causes remain only partially understood as a result of extensive clinical and genomic heterogeneity. Whole-genome sequencing (WGS) shows promise as a tool for identifying ASD risk genes as well as unreported mutations in known loci, but an assessment of its full utility in an ASD group has not b…	AFF2	Gene	0.9885879755020142
15_genes_variants_mutations_novo	Autism Spectrum Disorder (ASD) demonstrates high heritability and familial clustering, yet the genetic causes remain only partially understood as a result of extensive clinical and genomic heterogeneity. Whole-genome sequencing (WGS) shows promise as a tool for identifying ASD risk genes as well as unreported mutations in known loci, but an assessment of its full utility in an ASD group has not b…	FMR1	Gene	0.9800728559494019
15_genes_variants_mutations_novo	Autism Spectrum Disorder (ASD) demonstrates high heritability and familial clustering, yet the genetic causes remain only partially understood as a result of extensive clinical and genomic heterogeneity. Whole-genome sequencing (WGS) shows promise as a tool for identifying ASD risk genes as well as unreported mutations in known loci, but an assessment of its full utility in an ASD group has not b…	VIP	Gene	0.7727761268615723
15_genes_variants_mutations_novo	Autism Spectrum Disorder (ASD) demonstrates high heritability and familial clustering, yet the genetic causes remain only partially understood as a result of extensive clinical and genomic heterogeneity. Whole-genome sequencing (WGS) shows promise as a tool for identifying ASD risk genes as well as unreported mutations in known loci, but an assessment of its full utility in an ASD group has not b…	SCN2A	Gene	0.9924561977386475
15_genes_variants_mutations_novo	Autism Spectrum Disorder (ASD) demonstrates high heritability and familial clustering, yet the genetic causes remain only partially understood as a result of extensive clinical and genomic heterogeneity. Whole-genome sequencing (WGS) shows promise as a tool for identifying ASD risk genes as well as unreported mutations in known loci, but an assessment of its full utility in an ASD group has not b…	KCNQ2	Gene	0.9915086030960083
15_genes_variants_mutations_novo	Autism Spectrum Disorder (ASD) demonstrates high heritability and familial clustering, yet the genetic causes remain only partially understood as a result of extensive clinical and genomic heterogeneity. Whole-genome sequencing (WGS) shows promise as a tool for identifying ASD risk genes as well as unreported mutations in known loci, but an assessment of its full utility in an ASD group has not b…	NRXN1	Gene	0.994085
15_genes_variants_mutations_novo	Autism Spectrum Disorder (ASD) demonstrates high heritability and familial clustering, yet the genetic causes remain only partially understood as a result of extensive clinical and genomic heterogeneity. Whole-genome sequencing (WGS) shows promise as a tool for identifying ASD risk genes as well as unreported mutations in known loci, but an assessment of its full utility in an ASD group has not b…	CHD7	Gene	0.988545
15_genes_variants_mutations_novo	Autism Spectrum Disorder (ASD) demonstrates high heritability and familial clustering, yet the genetic causes remain only partially understood as a result of extensive clinical and genomic heterogeneity. Whole-genome sequencing (WGS) shows promise as a tool for identifying ASD risk genes as well as unreported mutations in known loci, but an assessment of its full utility in an ASD group has not b…	ASD-associated	Gene	0.9247668385505676
2_synaptic_genes_mice_protein	Molecular and neurobiological evidence for the involvement of neuroligins (particularly NLGN3 and NLGN4X genes) in autistic disorder is accumulating. However, previous mutation screening studies on these two genes have yielded controversial results. The present study explores, for the first time, the contribution of NLGN3 and NLGN4X genetic variants in Greek patients with autistic disorder. We an…	neuroligins	Gene	0.6187363862991333
2_synaptic_genes_mice_protein	Molecular and neurobiological evidence for the involvement of neuroligins (particularly NLGN3 and NLGN4X genes) in autistic disorder is accumulating. However, previous mutation screening studies on these two genes have yielded controversial results. The present study explores, for the first time, the contribution of NLGN3 and NLGN4X genetic variants in Greek patients with autistic disorder. We an…	NLGN3	Gene	0.9954284429550171
2_synaptic_genes_mice_protein	Molecular and neurobiological evidence for the involvement of neuroligins (particularly NLGN3 and NLGN4X genes) in autistic disorder is accumulating. However, previous mutation screening studies on these two genes have yielded controversial results. The present study explores, for the first time, the contribution of NLGN3 and NLGN4X genetic variants in Greek patients with autistic disorder. We an…	NLGN4X	Gene	0.9957565665245056
2_synaptic_genes_mice_protein	Molecular and neurobiological evidence for the involvement of neuroligins (particularly NLGN3 and NLGN4X genes) in autistic disorder is accumulating. However, previous mutation screening studies on these two genes have yielded controversial results. The present study explores, for the first time, the contribution of NLGN3 and NLGN4X genetic variants in Greek patients with autistic disorder. We an…	NLGN3	Gene	0.9969727993011475
2_synaptic_genes_mice_protein	Molecular and neurobiological evidence for the involvement of neuroligins (particularly NLGN3 and NLGN4X genes) in autistic disorder is accumulating. However, previous mutation screening studies on these two genes have yielded controversial results. The present study explores, for the first time, the contribution of NLGN3 and NLGN4X genetic variants in Greek patients with autistic disorder. We an…	NLGN4X	Gene	0.9953430891036987
2_synaptic_genes_mice_protein	Molecular and neurobiological evidence for the involvement of neuroligins (particularly NLGN3 and NLGN4X genes) in autistic disorder is accumulating. However, previous mutation screening studies on these two genes have yielded controversial results. The present study explores, for the first time, the contribution of NLGN3 and NLGN4X genetic variants in Greek patients with autistic disorder. We an…	NLGN3	Gene	0.998358
2_synaptic_genes_mice_protein	Molecular and neurobiological evidence for the involvement of neuroligins (particularly NLGN3 and NLGN4X genes) in autistic disorder is accumulating. However, previous mutation screening studies on these two genes have yielded controversial results. The present study explores, for the first time, the contribution of NLGN3 and NLGN4X genetic variants in Greek patients with autistic disorder. We an…	NLGN4X	Gene	0.9985030889511108
2_synaptic_genes_mice_protein	Molecular and neurobiological evidence for the involvement of neuroligins (particularly NLGN3 and NLGN4X genes) in autistic disorder is accumulating. However, previous mutation screening studies on these two genes have yielded controversial results. The present study explores, for the first time, the contribution of NLGN3 and NLGN4X genetic variants in Greek patients with autistic disorder. We an…	NLGN4X	Gene	0.9958276152610779
2_synaptic_genes_mice_protein	Molecular and neurobiological evidence for the involvement of neuroligins (particularly NLGN3 and NLGN4X genes) in autistic disorder is accumulating. However, previous mutation screening studies on these two genes have yielded controversial results. The present study explores, for the first time, the contribution of NLGN3 and NLGN4X genetic variants in Greek patients with autistic disorder. We an…	NLGN3	Gene	0.9941322207450867
54_fxs_fragile_fmrp_fmr1	Fragile X syndrome, the most common heritable form of cognitive impairment, is caused by epigenetic silencing of the fragile X (FMR1) gene owing to large expansions (>200 repeats) of a non-coding CGG-repeat element. Smaller, so-called premutation expansions (55-200 repeats) can cause a family of neurodevelopmental phenotypes (attention deficit hyperactivity disorder, autism spectrum disorder, sei…	FMR1	Gene	0.9330692291259766
54_fxs_fragile_fmrp_fmr1	Fragile X syndrome, the most common heritable form of cognitive impairment, is caused by epigenetic silencing of the fragile X (FMR1) gene owing to large expansions (>200 repeats) of a non-coding CGG-repeat element. Smaller, so-called premutation expansions (55-200 repeats) can cause a family of neurodevelopmental phenotypes (attention deficit hyperactivity disorder, autism spectrum disorder, sei…	FMR1	Gene	0.9579574465751648
2_synaptic_genes_mice_protein	Autism is a disease of brain plasticity. Inspiring work of Willem Hendrik Gispen on neuronal plasticity has stimulated us to investigate gene defects in autism and the consequences for brain development. The central process in the pathogenesis of autism is local dendritic mRNA translation which is dependent on axodendritic communication. Hence, most autism-related gene products (i) are part of th…	mTOR	Gene	0.8290557861328125
2_synaptic_genes_mice_protein	Autism is a disease of brain plasticity. Inspiring work of Willem Hendrik Gispen on neuronal plasticity has stimulated us to investigate gene defects in autism and the consequences for brain development. The central process in the pathogenesis of autism is local dendritic mRNA translation which is dependent on axodendritic communication. Hence, most autism-related gene products (i) are part of th…	contactin	Gene	0.5871380567550659
2_synaptic_genes_mice_protein	Autism is a disease of brain plasticity. Inspiring work of Willem Hendrik Gispen on neuronal plasticity has stimulated us to investigate gene defects in autism and the consequences for brain development. The central process in the pathogenesis of autism is local dendritic mRNA translation which is dependent on axodendritic communication. Hence, most autism-related gene products (i) are part of th…	CNTN	Gene	0.6785981059074402
2_synaptic_genes_mice_protein	Autism is a disease of brain plasticity. Inspiring work of Willem Hendrik Gispen on neuronal plasticity has stimulated us to investigate gene defects in autism and the consequences for brain development. The central process in the pathogenesis of autism is local dendritic mRNA translation which is dependent on axodendritic communication. Hence, most autism-related gene products (i) are part of th…	CNTN4	Gene	0.9892784953117371
2_synaptic_genes_mice_protein	Autism is a disease of brain plasticity. Inspiring work of Willem Hendrik Gispen on neuronal plasticity has stimulated us to investigate gene defects in autism and the consequences for brain development. The central process in the pathogenesis of autism is local dendritic mRNA translation which is dependent on axodendritic communication. Hence, most autism-related gene products (i) are part of th…	CNTN5	Gene	0.9973560571670532
2_synaptic_genes_mice_protein	Autism is a disease of brain plasticity. Inspiring work of Willem Hendrik Gispen on neuronal plasticity has stimulated us to investigate gene defects in autism and the consequences for brain development. The central process in the pathogenesis of autism is local dendritic mRNA translation which is dependent on axodendritic communication. Hence, most autism-related gene products (i) are part of th…	CNTN6	Gene	0.9958577752113342
2_synaptic_genes_mice_protein	Autism is a disease of brain plasticity. Inspiring work of Willem Hendrik Gispen on neuronal plasticity has stimulated us to investigate gene defects in autism and the consequences for brain development. The central process in the pathogenesis of autism is local dendritic mRNA translation which is dependent on axodendritic communication. Hence, most autism-related gene products (i) are part of th…	CNTN	Gene	0.8878161311149597
15_genes_variants_mutations_novo	Copy number variations (CNVs) and DNA sequence alterations affecting specific neuronal genes are established risk factors for Autism Spectrum Disorder (ASD). In what is largely considered a genetic condition, so far, these mutations account for ~20% of individuals having an ASD diagnosis. However, non-coding genomic sequence also contains functional elements introducing additional disease risk lo…	CDH8	Gene	0.9927465319633484
15_genes_variants_mutations_novo	Copy number variations (CNVs) and DNA sequence alterations affecting specific neuronal genes are established risk factors for Autism Spectrum Disorder (ASD). In what is largely considered a genetic condition, so far, these mutations account for ~20% of individuals having an ASD diagnosis. However, non-coding genomic sequence also contains functional elements introducing additional disease risk lo…	NRXN1	Gene	0.9944698810577393
15_genes_variants_mutations_novo	Copy number variations (CNVs) and DNA sequence alterations affecting specific neuronal genes are established risk factors for Autism Spectrum Disorder (ASD). In what is largely considered a genetic condition, so far, these mutations account for ~20% of individuals having an ASD diagnosis. However, non-coding genomic sequence also contains functional elements introducing additional disease risk lo…	ZHX2	Gene	0.9560097455978394
15_genes_variants_mutations_novo	Copy number variations (CNVs) and DNA sequence alterations affecting specific neuronal genes are established risk factors for Autism Spectrum Disorder (ASD). In what is largely considered a genetic condition, so far, these mutations account for ~20% of individuals having an ASD diagnosis. However, non-coding genomic sequence also contains functional elements introducing additional disease risk lo…	MOCS1	Gene	0.9824449419975281
15_genes_variants_mutations_novo	Copy number variations (CNVs) and DNA sequence alterations affecting specific neuronal genes are established risk factors for Autism Spectrum Disorder (ASD). In what is largely considered a genetic condition, so far, these mutations account for ~20% of individuals having an ASD diagnosis. However, non-coding genomic sequence also contains functional elements introducing additional disease risk lo…	LRRC4C	Gene	0.9949005246162415
15_genes_variants_mutations_novo	Copy number variations (CNVs) and DNA sequence alterations affecting specific neuronal genes are established risk factors for Autism Spectrum Disorder (ASD). In what is largely considered a genetic condition, so far, these mutations account for ~20% of individuals having an ASD diagnosis. However, non-coding genomic sequence also contains functional elements introducing additional disease risk lo…	SEMA3C	Gene	0.9940821528434753
17_methylation_epigenetic_dna_genes	Autism is a behaviorally defined, neurological disorder with symptom onset before the age of 3. Abnormalities in social-emotional behaviors are a core deficit in autism, and are characterized by impaired reciprocal-social interaction, lack of facial expressions, and the inability to recognize familiar faces. The posterior cingulate cortex (PCC) and fusiform gyrus (FG) are two regions within an ex…	5-HT receptor	Gene	0.5933709740638733
17_methylation_epigenetic_dna_genes	Autism is a behaviorally defined, neurological disorder with symptom onset before the age of 3. Abnormalities in social-emotional behaviors are a core deficit in autism, and are characterized by impaired reciprocal-social interaction, lack of facial expressions, and the inability to recognize familiar faces. The posterior cingulate cortex (PCC) and fusiform gyrus (FG) are two regions within an ex…	5-HT1A	Gene	0.47837719321250916
17_methylation_epigenetic_dna_genes	Autism is a behaviorally defined, neurological disorder with symptom onset before the age of 3. Abnormalities in social-emotional behaviors are a core deficit in autism, and are characterized by impaired reciprocal-social interaction, lack of facial expressions, and the inability to recognize familiar faces. The posterior cingulate cortex (PCC) and fusiform gyrus (FG) are two regions within an ex…	5-HT(2A) receptors	Gene	0.7679313063621521
17_methylation_epigenetic_dna_genes	Autism is a behaviorally defined, neurological disorder with symptom onset before the age of 3. Abnormalities in social-emotional behaviors are a core deficit in autism, and are characterized by impaired reciprocal-social interaction, lack of facial expressions, and the inability to recognize familiar faces. The posterior cingulate cortex (PCC) and fusiform gyrus (FG) are two regions within an ex…	serotonin transporters	Gene	0.7505933046340942
17_methylation_epigenetic_dna_genes	Autism is a behaviorally defined, neurological disorder with symptom onset before the age of 3. Abnormalities in social-emotional behaviors are a core deficit in autism, and are characterized by impaired reciprocal-social interaction, lack of facial expressions, and the inability to recognize familiar faces. The posterior cingulate cortex (PCC) and fusiform gyrus (FG) are two regions within an ex…	5-HTT	Gene	0.907884
17_methylation_epigenetic_dna_genes	Autism is a behaviorally defined, neurological disorder with symptom onset before the age of 3. Abnormalities in social-emotional behaviors are a core deficit in autism, and are characterized by impaired reciprocal-social interaction, lack of facial expressions, and the inability to recognize familiar faces. The posterior cingulate cortex (PCC) and fusiform gyrus (FG) are two regions within an ex…	5-HT receptor	Gene	0.6282428205013275
52_metabolic_metabolism_amino_metabolites	Autism spectrum disorder is characterized by social communicative deficits with restricted interests occurring in about 1% of the population. Although its exact cause is not known, several factors have been implicated in its etiology, including inborn errors of metabolism. Although relatively uncommon, these disorders frequently occur in countries with high rates of consanguinity and are often as…	glucose-6-phosphatase	Gene	0.6758686900138855
52_metabolic_metabolism_amino_metabolites	Autism spectrum disorder is characterized by social communicative deficits with restricted interests occurring in about 1% of the population. Although its exact cause is not known, several factors have been implicated in its etiology, including inborn errors of metabolism. Although relatively uncommon, these disorders frequently occur in countries with high rates of consanguinity and are often as…	adenosine deaminase	Gene	0.8085287511348724
52_metabolic_metabolism_amino_metabolites	Autism spectrum disorder is characterized by social communicative deficits with restricted interests occurring in about 1% of the population. Although its exact cause is not known, several factors have been implicated in its etiology, including inborn errors of metabolism. Although relatively uncommon, these disorders frequently occur in countries with high rates of consanguinity and are often as…	branched chain ketoacid dehydrogenase kinase	Gene	0.7299787521362304
50_gut_microbiota_metabolic_diseases	The aim of this study was to develop a high-throughput urine screening technique for adenylosuccinate lyase (ADSL) deficiency and to evaluate S-adenosyl-l-methionine (SAMe) as a potential treatment for this disorder.Testing for succinyladenosine (S-Ado), a marker of ADSL deficiency, was incorporated into a screening panel for urine biomarkers for inborn errors of metabolism using electrospray tan…	adenylosuccinate lyase	Gene	0.7628191113471985
50_gut_microbiota_metabolic_diseases	The aim of this study was to develop a high-throughput urine screening technique for adenylosuccinate lyase (ADSL) deficiency and to evaluate S-adenosyl-l-methionine (SAMe) as a potential treatment for this disorder.Testing for succinyladenosine (S-Ado), a marker of ADSL deficiency, was incorporated into a screening panel for urine biomarkers for inborn errors of metabolism using electrospray tan…	ADSL	Gene	0.9935709238052368
50_gut_microbiota_metabolic_diseases	The aim of this study was to develop a high-throughput urine screening technique for adenylosuccinate lyase (ADSL) deficiency and to evaluate S-adenosyl-l-methionine (SAMe) as a potential treatment for this disorder.Testing for succinyladenosine (S-Ado), a marker of ADSL deficiency, was incorporated into a screening panel for urine biomarkers for inborn errors of metabolism using electrospray tan…	ADSL	Gene	0.989995
50_gut_microbiota_metabolic_diseases	The aim of this study was to develop a high-throughput urine screening technique for adenylosuccinate lyase (ADSL) deficiency and to evaluate S-adenosyl-l-methionine (SAMe) as a potential treatment for this disorder.Testing for succinyladenosine (S-Ado), a marker of ADSL deficiency, was incorporated into a screening panel for urine biomarkers for inborn errors of metabolism using electrospray tan…	ADSL	Gene	0.982891
50_gut_microbiota_metabolic_diseases	The aim of this study was to develop a high-throughput urine screening technique for adenylosuccinate lyase (ADSL) deficiency and to evaluate S-adenosyl-l-methionine (SAMe) as a potential treatment for this disorder.Testing for succinyladenosine (S-Ado), a marker of ADSL deficiency, was incorporated into a screening panel for urine biomarkers for inborn errors of metabolism using electrospray tan…	ADSL	Gene	0.8679981827735901
50_gut_microbiota_metabolic_diseases	The aim of this study was to develop a high-throughput urine screening technique for adenylosuccinate lyase (ADSL) deficiency and to evaluate S-adenosyl-l-methionine (SAMe) as a potential treatment for this disorder.Testing for succinyladenosine (S-Ado), a marker of ADSL deficiency, was incorporated into a screening panel for urine biomarkers for inborn errors of metabolism using electrospray tan…	ADSL	Gene	0.9109241962432861
57_snps_association_genetic_polymorphisms	Runs of homozygosity (ROH) may play a role in complex diseases. In the current study, we aimed to test if ROHs are linked to the risk of autism and related language impairment. We analyzed 546,080 SNPs in 315 Han Chinese affected with autism and 1,115 controls. ROH was defined as an extended homozygous haplotype spanning at least 500 kb. Relative extended haplotype homozygosity (REHH) for the tra…	NPAT	Gene	0.9518445730209351
57_snps_association_genetic_polymorphisms	Runs of homozygosity (ROH) may play a role in complex diseases. In the current study, we aimed to test if ROHs are linked to the risk of autism and related language impairment. We analyzed 546,080 SNPs in 315 Han Chinese affected with autism and 1,115 controls. ROH was defined as an extended homozygous haplotype spanning at least 500 kb. Relative extended haplotype homozygosity (REHH) for the tra…	ATM	Gene	0.9455583691596985
57_snps_association_genetic_polymorphisms	Runs of homozygosity (ROH) may play a role in complex diseases. In the current study, we aimed to test if ROHs are linked to the risk of autism and related language impairment. We analyzed 546,080 SNPs in 315 Han Chinese affected with autism and 1,115 controls. ROH was defined as an extended homozygous haplotype spanning at least 500 kb. Relative extended haplotype homozygosity (REHH) for the tra…	CUL5	Gene	0.9364126324653625
57_snps_association_genetic_polymorphisms	Runs of homozygosity (ROH) may play a role in complex diseases. In the current study, we aimed to test if ROHs are linked to the risk of autism and related language impairment. We analyzed 546,080 SNPs in 315 Han Chinese affected with autism and 1,115 controls. ROH was defined as an extended homozygous haplotype spanning at least 500 kb. Relative extended haplotype homozygosity (REHH) for the tra…	culin 5	Gene	0.6452664434909821
24_cacna1c_mutation_mutations_timothy	Timothy Syndrome (TS) is caused by very rare exonic mutations of the CACNA1C gene that produce delayed inactivation of Cav1.2 voltage-gated calcium channels during cellular action potentials, with greatly increased influx of calcium into the activated cells. The major clinical feature of this syndrome is a long QT interval that results in cardiac arrhythmias. However, TS also includes cognitive i…	CACNA1C	Gene	0.9391488432884216
24_cacna1c_mutation_mutations_timothy	Timothy Syndrome (TS) is caused by very rare exonic mutations of the CACNA1C gene that produce delayed inactivation of Cav1.2 voltage-gated calcium channels during cellular action potentials, with greatly increased influx of calcium into the activated cells. The major clinical feature of this syndrome is a long QT interval that results in cardiac arrhythmias. However, TS also includes cognitive i…	Cav1.2	Gene	0.8445446491241455
24_cacna1c_mutation_mutations_timothy	Timothy Syndrome (TS) is caused by very rare exonic mutations of the CACNA1C gene that produce delayed inactivation of Cav1.2 voltage-gated calcium channels during cellular action potentials, with greatly increased influx of calcium into the activated cells. The major clinical feature of this syndrome is a long QT interval that results in cardiac arrhythmias. However, TS also includes cognitive i…	CACNA1C	Gene	0.9866372346878052
24_cacna1c_mutation_mutations_timothy	Timothy Syndrome (TS) is caused by very rare exonic mutations of the CACNA1C gene that produce delayed inactivation of Cav1.2 voltage-gated calcium channels during cellular action potentials, with greatly increased influx of calcium into the activated cells. The major clinical feature of this syndrome is a long QT interval that results in cardiac arrhythmias. However, TS also includes cognitive i…	CACNA1C	Gene	0.988987
24_cacna1c_mutation_mutations_timothy	Timothy Syndrome (TS) is caused by very rare exonic mutations of the CACNA1C gene that produce delayed inactivation of Cav1.2 voltage-gated calcium channels during cellular action potentials, with greatly increased influx of calcium into the activated cells. The major clinical feature of this syndrome is a long QT interval that results in cardiac arrhythmias. However, TS also includes cognitive i…	CACNA1C	Gene	0.9911109209060669
24_cacna1c_mutation_mutations_timothy	Timothy Syndrome (TS) is caused by very rare exonic mutations of the CACNA1C gene that produce delayed inactivation of Cav1.2 voltage-gated calcium channels during cellular action potentials, with greatly increased influx of calcium into the activated cells. The major clinical feature of this syndrome is a long QT interval that results in cardiac arrhythmias. However, TS also includes cognitive i…	CACNA1C	Gene	0.9918366074562073
2_synaptic_genes_mice_protein	Emerging researches point to a relevant role of postsynaptic density (PSD) proteins, such as PSD-95, Homer, Shank, and DISC-1, in the pathophysiology of schizophrenia and autism spectrum disorders. The PSD is a thickness, detectable at electronic microscopy, localized at the postsynaptic membrane of glutamatergic synapses, and made by scaffolding proteins, receptors, and effector proteins; it is …	PSD-95	Gene	0.950638
2_synaptic_genes_mice_protein	Emerging researches point to a relevant role of postsynaptic density (PSD) proteins, such as PSD-95, Homer, Shank, and DISC-1, in the pathophysiology of schizophrenia and autism spectrum disorders. The PSD is a thickness, detectable at electronic microscopy, localized at the postsynaptic membrane of glutamatergic synapses, and made by scaffolding proteins, receptors, and effector proteins; it is …	Homer	Gene	0.9304806590080261
2_synaptic_genes_mice_protein	Emerging researches point to a relevant role of postsynaptic density (PSD) proteins, such as PSD-95, Homer, Shank, and DISC-1, in the pathophysiology of schizophrenia and autism spectrum disorders. The PSD is a thickness, detectable at electronic microscopy, localized at the postsynaptic membrane of glutamatergic synapses, and made by scaffolding proteins, receptors, and effector proteins; it is …	Shank	Gene	0.9761985540390015
2_synaptic_genes_mice_protein	Emerging researches point to a relevant role of postsynaptic density (PSD) proteins, such as PSD-95, Homer, Shank, and DISC-1, in the pathophysiology of schizophrenia and autism spectrum disorders. The PSD is a thickness, detectable at electronic microscopy, localized at the postsynaptic membrane of glutamatergic synapses, and made by scaffolding proteins, receptors, and effector proteins; it is …	DISC-1	Gene	0.9392842054367065
2_synaptic_genes_mice_protein	Emerging researches point to a relevant role of postsynaptic density (PSD) proteins, such as PSD-95, Homer, Shank, and DISC-1, in the pathophysiology of schizophrenia and autism spectrum disorders. The PSD is a thickness, detectable at electronic microscopy, localized at the postsynaptic membrane of glutamatergic synapses, and made by scaffolding proteins, receptors, and effector proteins; it is …	PSD-95	Gene	0.9594740867614746
2_synaptic_genes_mice_protein	Emerging researches point to a relevant role of postsynaptic density (PSD) proteins, such as PSD-95, Homer, Shank, and DISC-1, in the pathophysiology of schizophrenia and autism spectrum disorders. The PSD is a thickness, detectable at electronic microscopy, localized at the postsynaptic membrane of glutamatergic synapses, and made by scaffolding proteins, receptors, and effector proteins; it is …	Homer1	Gene	0.966499
2_synaptic_genes_mice_protein	Emerging researches point to a relevant role of postsynaptic density (PSD) proteins, such as PSD-95, Homer, Shank, and DISC-1, in the pathophysiology of schizophrenia and autism spectrum disorders. The PSD is a thickness, detectable at electronic microscopy, localized at the postsynaptic membrane of glutamatergic synapses, and made by scaffolding proteins, receptors, and effector proteins; it is …	Shank	Gene	0.9657434821128845
41_variants_sequencing_exome_variant	Anomalies of eye development can lead to the rare eye malformations microphthalmia and anophthalmia (small or absent ocular globes), which are genetically very heterogeneous. Several genes have been associated with microphthalmia and anophthalmia, and exome sequencing has contributed to the identification of new genes. Very recently, homozygous variations within ALDH1A3 have been associated with …	ALDH1A3	Gene	0.9932017922401428
41_variants_sequencing_exome_variant	Anomalies of eye development can lead to the rare eye malformations microphthalmia and anophthalmia (small or absent ocular globes), which are genetically very heterogeneous. Several genes have been associated with microphthalmia and anophthalmia, and exome sequencing has contributed to the identification of new genes. Very recently, homozygous variations within ALDH1A3 have been associated with …	ALDH1A3	Gene	0.9957238435745239
41_variants_sequencing_exome_variant	Anomalies of eye development can lead to the rare eye malformations microphthalmia and anophthalmia (small or absent ocular globes), which are genetically very heterogeneous. Several genes have been associated with microphthalmia and anophthalmia, and exome sequencing has contributed to the identification of new genes. Very recently, homozygous variations within ALDH1A3 have been associated with …	ALDH1A3	Gene	0.9934778213500977
41_variants_sequencing_exome_variant	Anomalies of eye development can lead to the rare eye malformations microphthalmia and anophthalmia (small or absent ocular globes), which are genetically very heterogeneous. Several genes have been associated with microphthalmia and anophthalmia, and exome sequencing has contributed to the identification of new genes. Very recently, homozygous variations within ALDH1A3 have been associated with …	ALDH1A3	Gene	0.9931788444519043
2_synaptic_genes_mice_protein	Neurexins are synaptic plasma membrane proteins encoded by three genes (NRXN1, -2, -3) with alternative promoters. Mutations in neurexin genes have been identified in different neurodevelopmental disorders, including autism. Recently, two point mutations altering the translation initiation site of NRXN1Î² (c.-3G>T and c.3G>T) have been described in patients with autism and mental retardation. In …	Neurexins	Gene	0.730473
2_synaptic_genes_mice_protein	Neurexins are synaptic plasma membrane proteins encoded by three genes (NRXN1, -2, -3) with alternative promoters. Mutations in neurexin genes have been identified in different neurodevelopmental disorders, including autism. Recently, two point mutations altering the translation initiation site of NRXN1Î² (c.-3G>T and c.3G>T) have been described in patients with autism and mental retardation. In …	NRXN1, -2, -3	Gene	0.6928280762263707
2_synaptic_genes_mice_protein	Neurexins are synaptic plasma membrane proteins encoded by three genes (NRXN1, -2, -3) with alternative promoters. Mutations in neurexin genes have been identified in different neurodevelopmental disorders, including autism. Recently, two point mutations altering the translation initiation site of NRXN1Î² (c.-3G>T and c.3G>T) have been described in patients with autism and mental retardation. In …	neurexin	Gene	0.6395325660705566
2_synaptic_genes_mice_protein	Neurexins are synaptic plasma membrane proteins encoded by three genes (NRXN1, -2, -3) with alternative promoters. Mutations in neurexin genes have been identified in different neurodevelopmental disorders, including autism. Recently, two point mutations altering the translation initiation site of NRXN1Î² (c.-3G>T and c.3G>T) have been described in patients with autism and mental retardation. In …	NRXN1Î²	Gene	0.9416680932044983
2_synaptic_genes_mice_protein	Neurexins are synaptic plasma membrane proteins encoded by three genes (NRXN1, -2, -3) with alternative promoters. Mutations in neurexin genes have been identified in different neurodevelopmental disorders, including autism. Recently, two point mutations altering the translation initiation site of NRXN1Î² (c.-3G>T and c.3G>T) have been described in patients with autism and mental retardation. In …	NRXN1Î²	Gene	0.971155
2_synaptic_genes_mice_protein	Neurexins are synaptic plasma membrane proteins encoded by three genes (NRXN1, -2, -3) with alternative promoters. Mutations in neurexin genes have been identified in different neurodevelopmental disorders, including autism. Recently, two point mutations altering the translation initiation site of NRXN1Î² (c.-3G>T and c.3G>T) have been described in patients with autism and mental retardation. In …	NRXN1Î²	Gene	0.9685670137405396
2_synaptic_genes_mice_protein	Neurexins are synaptic plasma membrane proteins encoded by three genes (NRXN1, -2, -3) with alternative promoters. Mutations in neurexin genes have been identified in different neurodevelopmental disorders, including autism. Recently, two point mutations altering the translation initiation site of NRXN1Î² (c.-3G>T and c.3G>T) have been described in patients with autism and mental retardation. In …	NRXN1Î²	Gene	0.9648390412330627
2_synaptic_genes_mice_protein	NHE9 (SLC9A9) is an endosomal cation/proton antiporter with orthologues in yeast and bacteria. Rare, missense substitutions in NHE9 are genetically linked with autism but have not been functionally evaluated. Here we use evolutionary conservation analysis to build a model structure of NHE9 based on the crystal structure of bacterial NhaA and use it to screen autism-associated variants in the huma…	NHE9	Gene	0.9928243160247803
2_synaptic_genes_mice_protein	NHE9 (SLC9A9) is an endosomal cation/proton antiporter with orthologues in yeast and bacteria. Rare, missense substitutions in NHE9 are genetically linked with autism but have not been functionally evaluated. Here we use evolutionary conservation analysis to build a model structure of NHE9 based on the crystal structure of bacterial NhaA and use it to screen autism-associated variants in the huma…	SLC9A9	Gene	0.9953681230545044
2_synaptic_genes_mice_protein	NHE9 (SLC9A9) is an endosomal cation/proton antiporter with orthologues in yeast and bacteria. Rare, missense substitutions in NHE9 are genetically linked with autism but have not been functionally evaluated. Here we use evolutionary conservation analysis to build a model structure of NHE9 based on the crystal structure of bacterial NhaA and use it to screen autism-associated variants in the huma…	NHE9	Gene	0.9842313528060913
2_synaptic_genes_mice_protein	NHE9 (SLC9A9) is an endosomal cation/proton antiporter with orthologues in yeast and bacteria. Rare, missense substitutions in NHE9 are genetically linked with autism but have not been functionally evaluated. Here we use evolutionary conservation analysis to build a model structure of NHE9 based on the crystal structure of bacterial NhaA and use it to screen autism-associated variants in the huma…	NHE9	Gene	0.9918083548545837
2_synaptic_genes_mice_protein	NHE9 (SLC9A9) is an endosomal cation/proton antiporter with orthologues in yeast and bacteria. Rare, missense substitutions in NHE9 are genetically linked with autism but have not been functionally evaluated. Here we use evolutionary conservation analysis to build a model structure of NHE9 based on the crystal structure of bacterial NhaA and use it to screen autism-associated variants in the huma…	NhaA	Gene	0.9350924491882324
2_synaptic_genes_mice_protein	NHE9 (SLC9A9) is an endosomal cation/proton antiporter with orthologues in yeast and bacteria. Rare, missense substitutions in NHE9 are genetically linked with autism but have not been functionally evaluated. Here we use evolutionary conservation analysis to build a model structure of NHE9 based on the crystal structure of bacterial NhaA and use it to screen autism-associated variants in the huma…	NHE9-GFP	Gene	0.9497624635696411
2_synaptic_genes_mice_protein	NHE9 (SLC9A9) is an endosomal cation/proton antiporter with orthologues in yeast and bacteria. Rare, missense substitutions in NHE9 are genetically linked with autism but have not been functionally evaluated. Here we use evolutionary conservation analysis to build a model structure of NHE9 based on the crystal structure of bacterial NhaA and use it to screen autism-associated variants in the huma…	transferrin	Gene	0.7639128565788269
2_synaptic_genes_mice_protein	NHE9 (SLC9A9) is an endosomal cation/proton antiporter with orthologues in yeast and bacteria. Rare, missense substitutions in NHE9 are genetically linked with autism but have not been functionally evaluated. Here we use evolutionary conservation analysis to build a model structure of NHE9 based on the crystal structure of bacterial NhaA and use it to screen autism-associated variants in the huma…	transferrin receptor	Gene	0.655665
2_synaptic_genes_mice_protein	NHE9 (SLC9A9) is an endosomal cation/proton antiporter with orthologues in yeast and bacteria. Rare, missense substitutions in NHE9 are genetically linked with autism but have not been functionally evaluated. Here we use evolutionary conservation analysis to build a model structure of NHE9 based on the crystal structure of bacterial NhaA and use it to screen autism-associated variants in the huma…	GLAST	Gene	0.8091230392456055
2_synaptic_genes_mice_protein	NHE9 (SLC9A9) is an endosomal cation/proton antiporter with orthologues in yeast and bacteria. Rare, missense substitutions in NHE9 are genetically linked with autism but have not been functionally evaluated. Here we use evolutionary conservation analysis to build a model structure of NHE9 based on the crystal structure of bacterial NhaA and use it to screen autism-associated variants in the huma…	NHE9	Gene	0.986586
96_channel_scn2a_channels_voltage	Mutations in neuronal voltage-gated sodium channel genes SCN1A, SCN2A, and SCN3A may play an important role in the etiology of neurological diseases and psychiatric disorders, besides various types of epilepsy. Here we describe a 3-year-old boy with autistic features, language delay, microcephaly and no history of seizures. Array-CGH analysis revealed an interstitial deletion of ~291.9kB at band …	SCN1A	Gene	0.9625402092933655
96_channel_scn2a_channels_voltage	Mutations in neuronal voltage-gated sodium channel genes SCN1A, SCN2A, and SCN3A may play an important role in the etiology of neurological diseases and psychiatric disorders, besides various types of epilepsy. Here we describe a 3-year-old boy with autistic features, language delay, microcephaly and no history of seizures. Array-CGH analysis revealed an interstitial deletion of ~291.9kB at band …	SCN2A	Gene	0.9903351068496704
96_channel_scn2a_channels_voltage	Mutations in neuronal voltage-gated sodium channel genes SCN1A, SCN2A, and SCN3A may play an important role in the etiology of neurological diseases and psychiatric disorders, besides various types of epilepsy. Here we describe a 3-year-old boy with autistic features, language delay, microcephaly and no history of seizures. Array-CGH analysis revealed an interstitial deletion of ~291.9kB at band …	SCN3A	Gene	0.9875668287277222
96_channel_scn2a_channels_voltage	Mutations in neuronal voltage-gated sodium channel genes SCN1A, SCN2A, and SCN3A may play an important role in the etiology of neurological diseases and psychiatric disorders, besides various types of epilepsy. Here we describe a 3-year-old boy with autistic features, language delay, microcephaly and no history of seizures. Array-CGH analysis revealed an interstitial deletion of ~291.9kB at band …	SCN2A	Gene	0.9876874089241028
96_channel_scn2a_channels_voltage	Mutations in neuronal voltage-gated sodium channel genes SCN1A, SCN2A, and SCN3A may play an important role in the etiology of neurological diseases and psychiatric disorders, besides various types of epilepsy. Here we describe a 3-year-old boy with autistic features, language delay, microcephaly and no history of seizures. Array-CGH analysis revealed an interstitial deletion of ~291.9kB at band …	SCN3A	Gene	0.9904239773750305
96_channel_scn2a_channels_voltage	Mutations in neuronal voltage-gated sodium channel genes SCN1A, SCN2A, and SCN3A may play an important role in the etiology of neurological diseases and psychiatric disorders, besides various types of epilepsy. Here we describe a 3-year-old boy with autistic features, language delay, microcephaly and no history of seizures. Array-CGH analysis revealed an interstitial deletion of ~291.9kB at band …	SCN2A	Gene	0.9960533380508423
96_channel_scn2a_channels_voltage	Mutations in neuronal voltage-gated sodium channel genes SCN1A, SCN2A, and SCN3A may play an important role in the etiology of neurological diseases and psychiatric disorders, besides various types of epilepsy. Here we describe a 3-year-old boy with autistic features, language delay, microcephaly and no history of seizures. Array-CGH analysis revealed an interstitial deletion of ~291.9kB at band …	SCN3A	Gene	0.9927616715431213
2_synaptic_genes_mice_protein	The neurexin family of cell adhesion proteins consists of three members in vertebrates and has homologs in several invertebrate species. In mammals, each neurexin gene encodes an Î±-neurexin in which the extracellular portion is long, and a Î²-neurexin in which the extracellular portion is short. As a result of alternative splicing, both major isoforms can be transcribed in many variants, contrib…	neurexin	Gene	0.656349
2_synaptic_genes_mice_protein	The neurexin family of cell adhesion proteins consists of three members in vertebrates and has homologs in several invertebrate species. In mammals, each neurexin gene encodes an Î±-neurexin in which the extracellular portion is long, and a Î²-neurexin in which the extracellular portion is short. As a result of alternative splicing, both major isoforms can be transcribed in many variants, contrib…	LRRTM	Gene	0.7463366389274597
2_synaptic_genes_mice_protein	The neurexin family of cell adhesion proteins consists of three members in vertebrates and has homologs in several invertebrate species. In mammals, each neurexin gene encodes an Î±-neurexin in which the extracellular portion is long, and a Î²-neurexin in which the extracellular portion is short. As a result of alternative splicing, both major isoforms can be transcribed in many variants, contrib…	cerebellin	Gene	0.8486742973327637
2_synaptic_genes_mice_protein	The neurexin family of cell adhesion proteins consists of three members in vertebrates and has homologs in several invertebrate species. In mammals, each neurexin gene encodes an Î±-neurexin in which the extracellular portion is long, and a Î²-neurexin in which the extracellular portion is short. As a result of alternative splicing, both major isoforms can be transcribed in many variants, contrib…	neurexin	Gene	0.5139710307121277
17_methylation_epigenetic_dna_genes	Previously, we identified multiple, rare serotonin (5-HT) transporter (SERT) variants in children with autism spectrum disorder (ASD). Although in our study the SERT Ala56 variant was over-transmitted to ASD probands, it was also seen in some unaffected individuals, suggesting that associated ASD risk is influenced by the epistatic effects of other genetic variation. Subsequently, we established …	serotonin (5-HT) transporter	Gene	0.6319247007369995
17_methylation_epigenetic_dna_genes	Previously, we identified multiple, rare serotonin (5-HT) transporter (SERT) variants in children with autism spectrum disorder (ASD). Although in our study the SERT Ala56 variant was over-transmitted to ASD probands, it was also seen in some unaffected individuals, suggesting that associated ASD risk is influenced by the epistatic effects of other genetic variation. Subsequently, we established …	SERT	Gene	0.8966481685638428
17_methylation_epigenetic_dna_genes	Previously, we identified multiple, rare serotonin (5-HT) transporter (SERT) variants in children with autism spectrum disorder (ASD). Although in our study the SERT Ala56 variant was over-transmitted to ASD probands, it was also seen in some unaffected individuals, suggesting that associated ASD risk is influenced by the epistatic effects of other genetic variation. Subsequently, we established …	SERT	Gene	0.9595242142677307
17_methylation_epigenetic_dna_genes	Previously, we identified multiple, rare serotonin (5-HT) transporter (SERT) variants in children with autism spectrum disorder (ASD). Although in our study the SERT Ala56 variant was over-transmitted to ASD probands, it was also seen in some unaffected individuals, suggesting that associated ASD risk is influenced by the epistatic effects of other genetic variation. Subsequently, we established …	SERT	Gene	0.9527333974838257
17_methylation_epigenetic_dna_genes	Previously, we identified multiple, rare serotonin (5-HT) transporter (SERT) variants in children with autism spectrum disorder (ASD). Although in our study the SERT Ala56 variant was over-transmitted to ASD probands, it was also seen in some unaffected individuals, suggesting that associated ASD risk is influenced by the epistatic effects of other genetic variation. Subsequently, we established …	SERT	Gene	0.9319368004798889
17_methylation_epigenetic_dna_genes	Previously, we identified multiple, rare serotonin (5-HT) transporter (SERT) variants in children with autism spectrum disorder (ASD). Although in our study the SERT Ala56 variant was over-transmitted to ASD probands, it was also seen in some unaffected individuals, suggesting that associated ASD risk is influenced by the epistatic effects of other genetic variation. Subsequently, we established …	SERT	Gene	0.888624
17_methylation_epigenetic_dna_genes	Previously, we identified multiple, rare serotonin (5-HT) transporter (SERT) variants in children with autism spectrum disorder (ASD). Although in our study the SERT Ala56 variant was over-transmitted to ASD probands, it was also seen in some unaffected individuals, suggesting that associated ASD risk is influenced by the epistatic effects of other genetic variation. Subsequently, we established …	SERT	Gene	0.9568830132484436
17_methylation_epigenetic_dna_genes	Previously, we identified multiple, rare serotonin (5-HT) transporter (SERT) variants in children with autism spectrum disorder (ASD). Although in our study the SERT Ala56 variant was over-transmitted to ASD probands, it was also seen in some unaffected individuals, suggesting that associated ASD risk is influenced by the epistatic effects of other genetic variation. Subsequently, we established …	5-HT receptor	Gene	0.7216476202011108
17_methylation_epigenetic_dna_genes	Previously, we identified multiple, rare serotonin (5-HT) transporter (SERT) variants in children with autism spectrum disorder (ASD). Although in our study the SERT Ala56 variant was over-transmitted to ASD probands, it was also seen in some unaffected individuals, suggesting that associated ASD risk is influenced by the epistatic effects of other genetic variation. Subsequently, we established …	SERT	Gene	0.8380616307258606
2_synaptic_genes_mice_protein	Na(+)/H(+) exchanger NHE6/SLC9A6 is an X-linked gene that is widely expressed and especially abundant in brain, heart and skeletal muscle where it is implicated in endosomal pH homeostasis and trafficking as well as maintenance of cell polarity. Recent genetic studies have identified several mutations in the coding region of NHE6 that are linked with severe intellectual disability, autistic behav…	NHE6	Gene	0.8429219126701355
2_synaptic_genes_mice_protein	Na(+)/H(+) exchanger NHE6/SLC9A6 is an X-linked gene that is widely expressed and especially abundant in brain, heart and skeletal muscle where it is implicated in endosomal pH homeostasis and trafficking as well as maintenance of cell polarity. Recent genetic studies have identified several mutations in the coding region of NHE6 that are linked with severe intellectual disability, autistic behav…	SLC9A6	Gene	0.9974932670593262
2_synaptic_genes_mice_protein	Na(+)/H(+) exchanger NHE6/SLC9A6 is an X-linked gene that is widely expressed and especially abundant in brain, heart and skeletal muscle where it is implicated in endosomal pH homeostasis and trafficking as well as maintenance of cell polarity. Recent genetic studies have identified several mutations in the coding region of NHE6 that are linked with severe intellectual disability, autistic behav…	NHE6	Gene	0.9818525910377502
2_synaptic_genes_mice_protein	Na(+)/H(+) exchanger NHE6/SLC9A6 is an X-linked gene that is widely expressed and especially abundant in brain, heart and skeletal muscle where it is implicated in endosomal pH homeostasis and trafficking as well as maintenance of cell polarity. Recent genetic studies have identified several mutations in the coding region of NHE6 that are linked with severe intellectual disability, autistic behav…	NHE6Î”WST	Gene	0.9227716326713562
2_synaptic_genes_mice_protein	Na(+)/H(+) exchanger NHE6/SLC9A6 is an X-linked gene that is widely expressed and especially abundant in brain, heart and skeletal muscle where it is implicated in endosomal pH homeostasis and trafficking as well as maintenance of cell polarity. Recent genetic studies have identified several mutations in the coding region of NHE6 that are linked with severe intellectual disability, autistic behav…	Î”WST	Gene	0.6216389536857605
2_synaptic_genes_mice_protein	Na(+)/H(+) exchanger NHE6/SLC9A6 is an X-linked gene that is widely expressed and especially abundant in brain, heart and skeletal muscle where it is implicated in endosomal pH homeostasis and trafficking as well as maintenance of cell polarity. Recent genetic studies have identified several mutations in the coding region of NHE6 that are linked with severe intellectual disability, autistic behav…	NHE6	Gene	0.991166
2_synaptic_genes_mice_protein	Na(+)/H(+) exchanger NHE6/SLC9A6 is an X-linked gene that is widely expressed and especially abundant in brain, heart and skeletal muscle where it is implicated in endosomal pH homeostasis and trafficking as well as maintenance of cell polarity. Recent genetic studies have identified several mutations in the coding region of NHE6 that are linked with severe intellectual disability, autistic behav…	transferrin	Gene	0.9204357266426086
2_synaptic_genes_mice_protein	Na(+)/H(+) exchanger NHE6/SLC9A6 is an X-linked gene that is widely expressed and especially abundant in brain, heart and skeletal muscle where it is implicated in endosomal pH homeostasis and trafficking as well as maintenance of cell polarity. Recent genetic studies have identified several mutations in the coding region of NHE6 that are linked with severe intellectual disability, autistic behav…	NHE6	Gene	0.9977974891662598
2_synaptic_genes_mice_protein	Na(+)/H(+) exchanger NHE6/SLC9A6 is an X-linked gene that is widely expressed and especially abundant in brain, heart and skeletal muscle where it is implicated in endosomal pH homeostasis and trafficking as well as maintenance of cell polarity. Recent genetic studies have identified several mutations in the coding region of NHE6 that are linked with severe intellectual disability, autistic behav…	NHE6	Gene	0.996302
2_synaptic_genes_mice_protein	Na(+)/H(+) exchanger NHE6/SLC9A6 is an X-linked gene that is widely expressed and especially abundant in brain, heart and skeletal muscle where it is implicated in endosomal pH homeostasis and trafficking as well as maintenance of cell polarity. Recent genetic studies have identified several mutations in the coding region of NHE6 that are linked with severe intellectual disability, autistic behav…	NHE6	Gene	0.9847114086151123
2_synaptic_genes_mice_protein	Autism spectrum disorders (ASD) are defined by behavioral deficits in social interaction and communication, repetitive stereotyped behaviors, and restricted interests/cognitive rigidity. Recent studies in humans and animal-models suggest that dysfunction of the cholinergic system may underlie autism-related behavioral symptoms. Here we tested the hypothesis that augmentation of acetylcholine (ACh…	acetylcholinesterase	Gene	0.8196921348571777
2_synaptic_genes_mice_protein	Autism spectrum disorders (ASD) are defined by behavioral deficits in social interaction and communication, repetitive stereotyped behaviors, and restricted interests/cognitive rigidity. Recent studies in humans and animal-models suggest that dysfunction of the cholinergic system may underlie autism-related behavioral symptoms. Here we tested the hypothesis that augmentation of acetylcholine (ACh…	acetylcholinesterase	Gene	0.7433705925941467
16_deletion_duplication_16p11_22q11	Paroxysmal kinesigenic dyskinesia with infantile convulsions (PKD/IC) is caused by mutations in the gene PRRT2 located in 16p11.2. A deletion syndrome 16p11.2 is well established and is characterized by intellectual disability, speech delay, and autism. PKD/IC, however, is extremely rare in this syndrome. We describe a case of PKD/IC and 16p11.2 deletion syndrome and discuss modifiers of PRRT2 ac…	PRRT2	Gene	0.9857932925224304
16_deletion_duplication_16p11_22q11	Paroxysmal kinesigenic dyskinesia with infantile convulsions (PKD/IC) is caused by mutations in the gene PRRT2 located in 16p11.2. A deletion syndrome 16p11.2 is well established and is characterized by intellectual disability, speech delay, and autism. PKD/IC, however, is extremely rare in this syndrome. We describe a case of PKD/IC and 16p11.2 deletion syndrome and discuss modifiers of PRRT2 ac…	PRRT2	Gene	0.9872358441352844
96_channel_scn2a_channels_voltage	Voltage-gated potassium channel Kv10.2 (KCNH5) is expressed in the nervous system, but its functions and involvement in human disease are poorly understood. We studied a human Kv10.2 channel mutation (R327H) recently identified in a child with epileptic encephalopathy and autistic features. Using multistate structural modeling, we demonstrate that the Arg327 residue in the S4 helix of voltage-sen…	Kv10.2	Gene	0.5545578002929688
96_channel_scn2a_channels_voltage	Voltage-gated potassium channel Kv10.2 (KCNH5) is expressed in the nervous system, but its functions and involvement in human disease are poorly understood. We studied a human Kv10.2 channel mutation (R327H) recently identified in a child with epileptic encephalopathy and autistic features. Using multistate structural modeling, we demonstrate that the Arg327 residue in the S4 helix of voltage-sen…	KCNH5	Gene	0.992257
96_channel_scn2a_channels_voltage	Voltage-gated potassium channel Kv10.2 (KCNH5) is expressed in the nervous system, but its functions and involvement in human disease are poorly understood. We studied a human Kv10.2 channel mutation (R327H) recently identified in a child with epileptic encephalopathy and autistic features. Using multistate structural modeling, we demonstrate that the Arg327 residue in the S4 helix of voltage-sen…	Kv10.2	Gene	0.7611592411994934
96_channel_scn2a_channels_voltage	Voltage-gated potassium channel Kv10.2 (KCNH5) is expressed in the nervous system, but its functions and involvement in human disease are poorly understood. We studied a human Kv10.2 channel mutation (R327H) recently identified in a child with epileptic encephalopathy and autistic features. Using multistate structural modeling, we demonstrate that the Arg327 residue in the S4 helix of voltage-sen…	Kv10.2	Gene	0.6833598017692566
120_pten_phts_macrocephaly_mutations	Autism is an etiologically heterogeneous group of neurodevelopmental disorders, diagnosed mostly by the clinical behavioral phenotypes. The concept that the tumor-related gene PTEN plays a critical role in autism spectrum disorder has emerged over the last decade. In this review, we focus on the essential role of the PTEN signaling pathway in neuronal differentiation and the formation of neural c…	PTEN	Gene	0.873259
120_pten_phts_macrocephaly_mutations	Autism is an etiologically heterogeneous group of neurodevelopmental disorders, diagnosed mostly by the clinical behavioral phenotypes. The concept that the tumor-related gene PTEN plays a critical role in autism spectrum disorder has emerged over the last decade. In this review, we focus on the essential role of the PTEN signaling pathway in neuronal differentiation and the formation of neural c…	PTEN	Gene	0.8654561638832092
120_pten_phts_macrocephaly_mutations	Autism is an etiologically heterogeneous group of neurodevelopmental disorders, diagnosed mostly by the clinical behavioral phenotypes. The concept that the tumor-related gene PTEN plays a critical role in autism spectrum disorder has emerged over the last decade. In this review, we focus on the essential role of the PTEN signaling pathway in neuronal differentiation and the formation of neural c…	Pten	Gene	0.995798
120_pten_phts_macrocephaly_mutations	Autism is an etiologically heterogeneous group of neurodevelopmental disorders, diagnosed mostly by the clinical behavioral phenotypes. The concept that the tumor-related gene PTEN plays a critical role in autism spectrum disorder has emerged over the last decade. In this review, we focus on the essential role of the PTEN signaling pathway in neuronal differentiation and the formation of neural c…	PTEN	Gene	0.9601159691810608
120_pten_phts_macrocephaly_mutations	PTEN hamartoma tumor syndrome (PHTS) refers to a spectrum of disorders caused by mutations in the phosphatase and tensin homolog (PTEN) gene. Diagnostic criteria for Cowden syndrome, the principal PTEN-related disorder, were first established in 1996 before the identification of the PTEN gene and the ability to molecularly confirm a clinical diagnosis. These consortium criteria were based on clin…	PTEN	Gene	0.9807122945785522
120_pten_phts_macrocephaly_mutations	PTEN hamartoma tumor syndrome (PHTS) refers to a spectrum of disorders caused by mutations in the phosphatase and tensin homolog (PTEN) gene. Diagnostic criteria for Cowden syndrome, the principal PTEN-related disorder, were first established in 1996 before the identification of the PTEN gene and the ability to molecularly confirm a clinical diagnosis. These consortium criteria were based on clin…	phosphatase and tensin homolog	Gene	0.6079323142766953
120_pten_phts_macrocephaly_mutations	PTEN hamartoma tumor syndrome (PHTS) refers to a spectrum of disorders caused by mutations in the phosphatase and tensin homolog (PTEN) gene. Diagnostic criteria for Cowden syndrome, the principal PTEN-related disorder, were first established in 1996 before the identification of the PTEN gene and the ability to molecularly confirm a clinical diagnosis. These consortium criteria were based on clin…	PTEN	Gene	0.9305397868156433
120_pten_phts_macrocephaly_mutations	PTEN hamartoma tumor syndrome (PHTS) refers to a spectrum of disorders caused by mutations in the phosphatase and tensin homolog (PTEN) gene. Diagnostic criteria for Cowden syndrome, the principal PTEN-related disorder, were first established in 1996 before the identification of the PTEN gene and the ability to molecularly confirm a clinical diagnosis. These consortium criteria were based on clin…	PTEN-related	Gene	0.8062745928764343
120_pten_phts_macrocephaly_mutations	PTEN hamartoma tumor syndrome (PHTS) refers to a spectrum of disorders caused by mutations in the phosphatase and tensin homolog (PTEN) gene. Diagnostic criteria for Cowden syndrome, the principal PTEN-related disorder, were first established in 1996 before the identification of the PTEN gene and the ability to molecularly confirm a clinical diagnosis. These consortium criteria were based on clin…	PTEN	Gene	0.9756404161453247
120_pten_phts_macrocephaly_mutations	PTEN hamartoma tumor syndrome (PHTS) refers to a spectrum of disorders caused by mutations in the phosphatase and tensin homolog (PTEN) gene. Diagnostic criteria for Cowden syndrome, the principal PTEN-related disorder, were first established in 1996 before the identification of the PTEN gene and the ability to molecularly confirm a clinical diagnosis. These consortium criteria were based on clin…	PTEN	Gene	0.9865625500679016
120_pten_phts_macrocephaly_mutations	PTEN hamartoma tumor syndrome (PHTS) refers to a spectrum of disorders caused by mutations in the phosphatase and tensin homolog (PTEN) gene. Diagnostic criteria for Cowden syndrome, the principal PTEN-related disorder, were first established in 1996 before the identification of the PTEN gene and the ability to molecularly confirm a clinical diagnosis. These consortium criteria were based on clin…	PTEN	Gene	0.9896336793899536
120_pten_phts_macrocephaly_mutations	PTEN hamartoma tumor syndrome (PHTS) refers to a spectrum of disorders caused by mutations in the phosphatase and tensin homolog (PTEN) gene. Diagnostic criteria for Cowden syndrome, the principal PTEN-related disorder, were first established in 1996 before the identification of the PTEN gene and the ability to molecularly confirm a clinical diagnosis. These consortium criteria were based on clin…	PTEN	Gene	0.9936056137084961
120_pten_phts_macrocephaly_mutations	PTEN hamartoma tumor syndrome (PHTS) refers to a spectrum of disorders caused by mutations in the phosphatase and tensin homolog (PTEN) gene. Diagnostic criteria for Cowden syndrome, the principal PTEN-related disorder, were first established in 1996 before the identification of the PTEN gene and the ability to molecularly confirm a clinical diagnosis. These consortium criteria were based on clin…	PTEN-related	Gene	0.8115034699440002
120_pten_phts_macrocephaly_mutations	PTEN hamartoma tumor syndrome (PHTS) refers to a spectrum of disorders caused by mutations in the phosphatase and tensin homolog (PTEN) gene. Diagnostic criteria for Cowden syndrome, the principal PTEN-related disorder, were first established in 1996 before the identification of the PTEN gene and the ability to molecularly confirm a clinical diagnosis. These consortium criteria were based on clin…	PTEN	Gene	0.9806782603263855
17_methylation_epigenetic_dna_genes	Long-term memory formation requires the coordinated regulation of gene expression. Until recently nucleosome remodeling, one of the major epigenetic mechanisms for controlling gene expression, had been largely unexplored in the field of neuroscience. Nucleosome remodeling is carried out by chromatin remodeling complexes (CRCs) that interact with DNA and histones to physically alter chromatin stru…	nBAF	Gene	0.6073098182678223
17_methylation_epigenetic_dna_genes	Long-term memory formation requires the coordinated regulation of gene expression. Until recently nucleosome remodeling, one of the major epigenetic mechanisms for controlling gene expression, had been largely unexplored in the field of neuroscience. Nucleosome remodeling is carried out by chromatin remodeling complexes (CRCs) that interact with DNA and histones to physically alter chromatin stru…	neuronal Brg1	Gene	0.6685334841410319
17_methylation_epigenetic_dna_genes	Long-term memory formation requires the coordinated regulation of gene expression. Until recently nucleosome remodeling, one of the major epigenetic mechanisms for controlling gene expression, had been largely unexplored in the field of neuroscience. Nucleosome remodeling is carried out by chromatin remodeling complexes (CRCs) that interact with DNA and histones to physically alter chromatin stru…	nBAF	Gene	0.8281089067459106
57_snps_association_genetic_polymorphisms	Multiple lines of genetic evidence suggest a role for CNTNAP2 in autism. To assess its population impact we studied 2148 common single nucleotide polymorphisms (SNPs) using transmission disequilibrium test (TDT) across the entire ~3.3 Mb CNTNAP2 locus in 186 (408 trios) multiplex and 323 simplex families with autistic spectrum disorder (ASD). This analysis yielded two SNPs with nominal statistica…	CNTNAP2	Gene	0.9937519431114197
57_snps_association_genetic_polymorphisms	Multiple lines of genetic evidence suggest a role for CNTNAP2 in autism. To assess its population impact we studied 2148 common single nucleotide polymorphisms (SNPs) using transmission disequilibrium test (TDT) across the entire ~3.3 Mb CNTNAP2 locus in 186 (408 trios) multiplex and 323 simplex families with autistic spectrum disorder (ASD). This analysis yielded two SNPs with nominal statistica…	CNTNAP2	Gene	0.9981448650360107
57_snps_association_genetic_polymorphisms	Multiple lines of genetic evidence suggest a role for CNTNAP2 in autism. To assess its population impact we studied 2148 common single nucleotide polymorphisms (SNPs) using transmission disequilibrium test (TDT) across the entire ~3.3 Mb CNTNAP2 locus in 186 (408 trios) multiplex and 323 simplex families with autistic spectrum disorder (ASD). This analysis yielded two SNPs with nominal statistica…	CNTNAP2	Gene	0.9983444213867188
57_snps_association_genetic_polymorphisms	Multiple lines of genetic evidence suggest a role for CNTNAP2 in autism. To assess its population impact we studied 2148 common single nucleotide polymorphisms (SNPs) using transmission disequilibrium test (TDT) across the entire ~3.3 Mb CNTNAP2 locus in 186 (408 trios) multiplex and 323 simplex families with autistic spectrum disorder (ASD). This analysis yielded two SNPs with nominal statistica…	CNTNAP2	Gene	0.995703
31_genetic_psychiatric_schizophrenia_polygenic	Deficits in sensitivity to visual stimuli of low spatial frequency and high temporal frequency (so-called frequency-doubled gratings) have been demonstrated both in schizophrenia and in autism spectrum disorder (ASD). Such basic perceptual functions are ideal candidates for molecular genetic study, because the underlying neural mechanisms are well characterized; but they have sometimes been overl…	PDZK1	Gene	0.9866935610771179
31_genetic_psychiatric_schizophrenia_polygenic	Deficits in sensitivity to visual stimuli of low spatial frequency and high temporal frequency (so-called frequency-doubled gratings) have been demonstrated both in schizophrenia and in autism spectrum disorder (ASD). Such basic perceptual functions are ideal candidates for molecular genetic study, because the underlying neural mechanisms are well characterized; but they have sometimes been overl…	PDZK1	Gene	0.9943682551383972
31_genetic_psychiatric_schizophrenia_polygenic	Deficits in sensitivity to visual stimuli of low spatial frequency and high temporal frequency (so-called frequency-doubled gratings) have been demonstrated both in schizophrenia and in autism spectrum disorder (ASD). Such basic perceptual functions are ideal candidates for molecular genetic study, because the underlying neural mechanisms are well characterized; but they have sometimes been overl…	PDZK1	Gene	0.992362
31_genetic_psychiatric_schizophrenia_polygenic	Deficits in sensitivity to visual stimuli of low spatial frequency and high temporal frequency (so-called frequency-doubled gratings) have been demonstrated both in schizophrenia and in autism spectrum disorder (ASD). Such basic perceptual functions are ideal candidates for molecular genetic study, because the underlying neural mechanisms are well characterized; but they have sometimes been overl…	N-methyl-d-aspartate receptors	Gene	0.714422
17_methylation_epigenetic_dna_genes	Intellectual disability (ID) is characterized by an extraordinary genetic heterogeneity, with >250 genes that have been implicated in monogenic forms of ID. Because this complexity precluded systematic testing for mutations and because clinical features are often non-specific, for some of these genes only few cases or families have been unambiguously documented. It is the case of the X-linked gen…	monoamine oxidase A	Gene	0.6301546196142832
17_methylation_epigenetic_dna_genes	Intellectual disability (ID) is characterized by an extraordinary genetic heterogeneity, with >250 genes that have been implicated in monogenic forms of ID. Because this complexity precluded systematic testing for mutations and because clinical features are often non-specific, for some of these genes only few cases or families have been unambiguously documented. It is the case of the X-linked gen…	MAOA	Gene	0.9371134042739868
17_methylation_epigenetic_dna_genes	Intellectual disability (ID) is characterized by an extraordinary genetic heterogeneity, with >250 genes that have been implicated in monogenic forms of ID. Because this complexity precluded systematic testing for mutations and because clinical features are often non-specific, for some of these genes only few cases or families have been unambiguously documented. It is the case of the X-linked gen…	MAOA	Gene	0.914562
17_methylation_epigenetic_dna_genes	Intellectual disability (ID) is characterized by an extraordinary genetic heterogeneity, with >250 genes that have been implicated in monogenic forms of ID. Because this complexity precluded systematic testing for mutations and because clinical features are often non-specific, for some of these genes only few cases or families have been unambiguously documented. It is the case of the X-linked gen…	MAOA	Gene	0.9231831431388855
17_methylation_epigenetic_dna_genes	Intellectual disability (ID) is characterized by an extraordinary genetic heterogeneity, with >250 genes that have been implicated in monogenic forms of ID. Because this complexity precluded systematic testing for mutations and because clinical features are often non-specific, for some of these genes only few cases or families have been unambiguously documented. It is the case of the X-linked gen…	MAOA	Gene	0.9390501379966736
17_methylation_epigenetic_dna_genes	Intellectual disability (ID) is characterized by an extraordinary genetic heterogeneity, with >250 genes that have been implicated in monogenic forms of ID. Because this complexity precluded systematic testing for mutations and because clinical features are often non-specific, for some of these genes only few cases or families have been unambiguously documented. It is the case of the X-linked gen…	MAOA	Gene	0.9481925368309021
50_gut_microbiota_metabolic_diseases	Adenylosuccinate lyase deficiency (dADSL) is a rare inherited metabolic disorder. Biochemical diagnosis of the disease is based on the determination of enormously elevated urinary levels of succinylaminoimidazole carboxamide riboside (SAICA-riboside) and succinyladenosine (SAdo). We report a case of false negative screening for dADSL caused by deribosylation of the urinary biomarkers SAICA-ribosi…	Adenylosuccinate lyase	Gene	0.7322579324245453
50_gut_microbiota_metabolic_diseases	Adenylosuccinate lyase deficiency (dADSL) is a rare inherited metabolic disorder. Biochemical diagnosis of the disease is based on the determination of enormously elevated urinary levels of succinylaminoimidazole carboxamide riboside (SAICA-riboside) and succinyladenosine (SAdo). We report a case of false negative screening for dADSL caused by deribosylation of the urinary biomarkers SAICA-ribosi…	dADSL	Gene	0.6854581832885742
57_snps_association_genetic_polymorphisms	Autism is a highly heritable neurodevelopmental disorder, and known genetic variants, mostly rare, account only for a small proportion of cases. Here we report a genome-wide association study on autism using two Chinese cohorts as gene discovery (n=2150) and three data sets of European ancestry populations for replication analysis of top association signals. Meta-analysis identified three single-…	AMPD1-NRAS-CSDE1	Gene	0.9494777917861938
57_snps_association_genetic_polymorphisms	Autism is a highly heritable neurodevelopmental disorder, and known genetic variants, mostly rare, account only for a small proportion of cases. Here we report a genome-wide association study on autism using two Chinese cohorts as gene discovery (n=2150) and three data sets of European ancestry populations for replication analysis of top association signals. Meta-analysis identified three single-…	TRIM33	Gene	0.9781109094619751
57_snps_association_genetic_polymorphisms	Autism is a highly heritable neurodevelopmental disorder, and known genetic variants, mostly rare, account only for a small proportion of cases. Here we report a genome-wide association study on autism using two Chinese cohorts as gene discovery (n=2150) and three data sets of European ancestry populations for replication analysis of top association signals. Meta-analysis identified three single-…	TRIM33-BCAS2	Gene	0.9522876739501953
[truncated: 8,750 more rows]
